# Supplementary material for: Mapping Dependence between Extreme Skew-Surge, Rainfall, and River-Flow
Source: MDPI journal article supplement (doi:10.3390/jmse10121818), 2022-11-25

## Skew-surge and rainfall ( $SS/R$ )

The following plots show Kendall's rank correlation coefficient  $\tau$ , significant at  $p$ -value  $< 0.05$ , for skew-surge and rainfall.

### $SS/R_{|SS}$ —rainfall dependent on skew-surge being extreme

Negative lags mean that the rainfall was experienced before the skew-surge and *vice versa*.

Opua

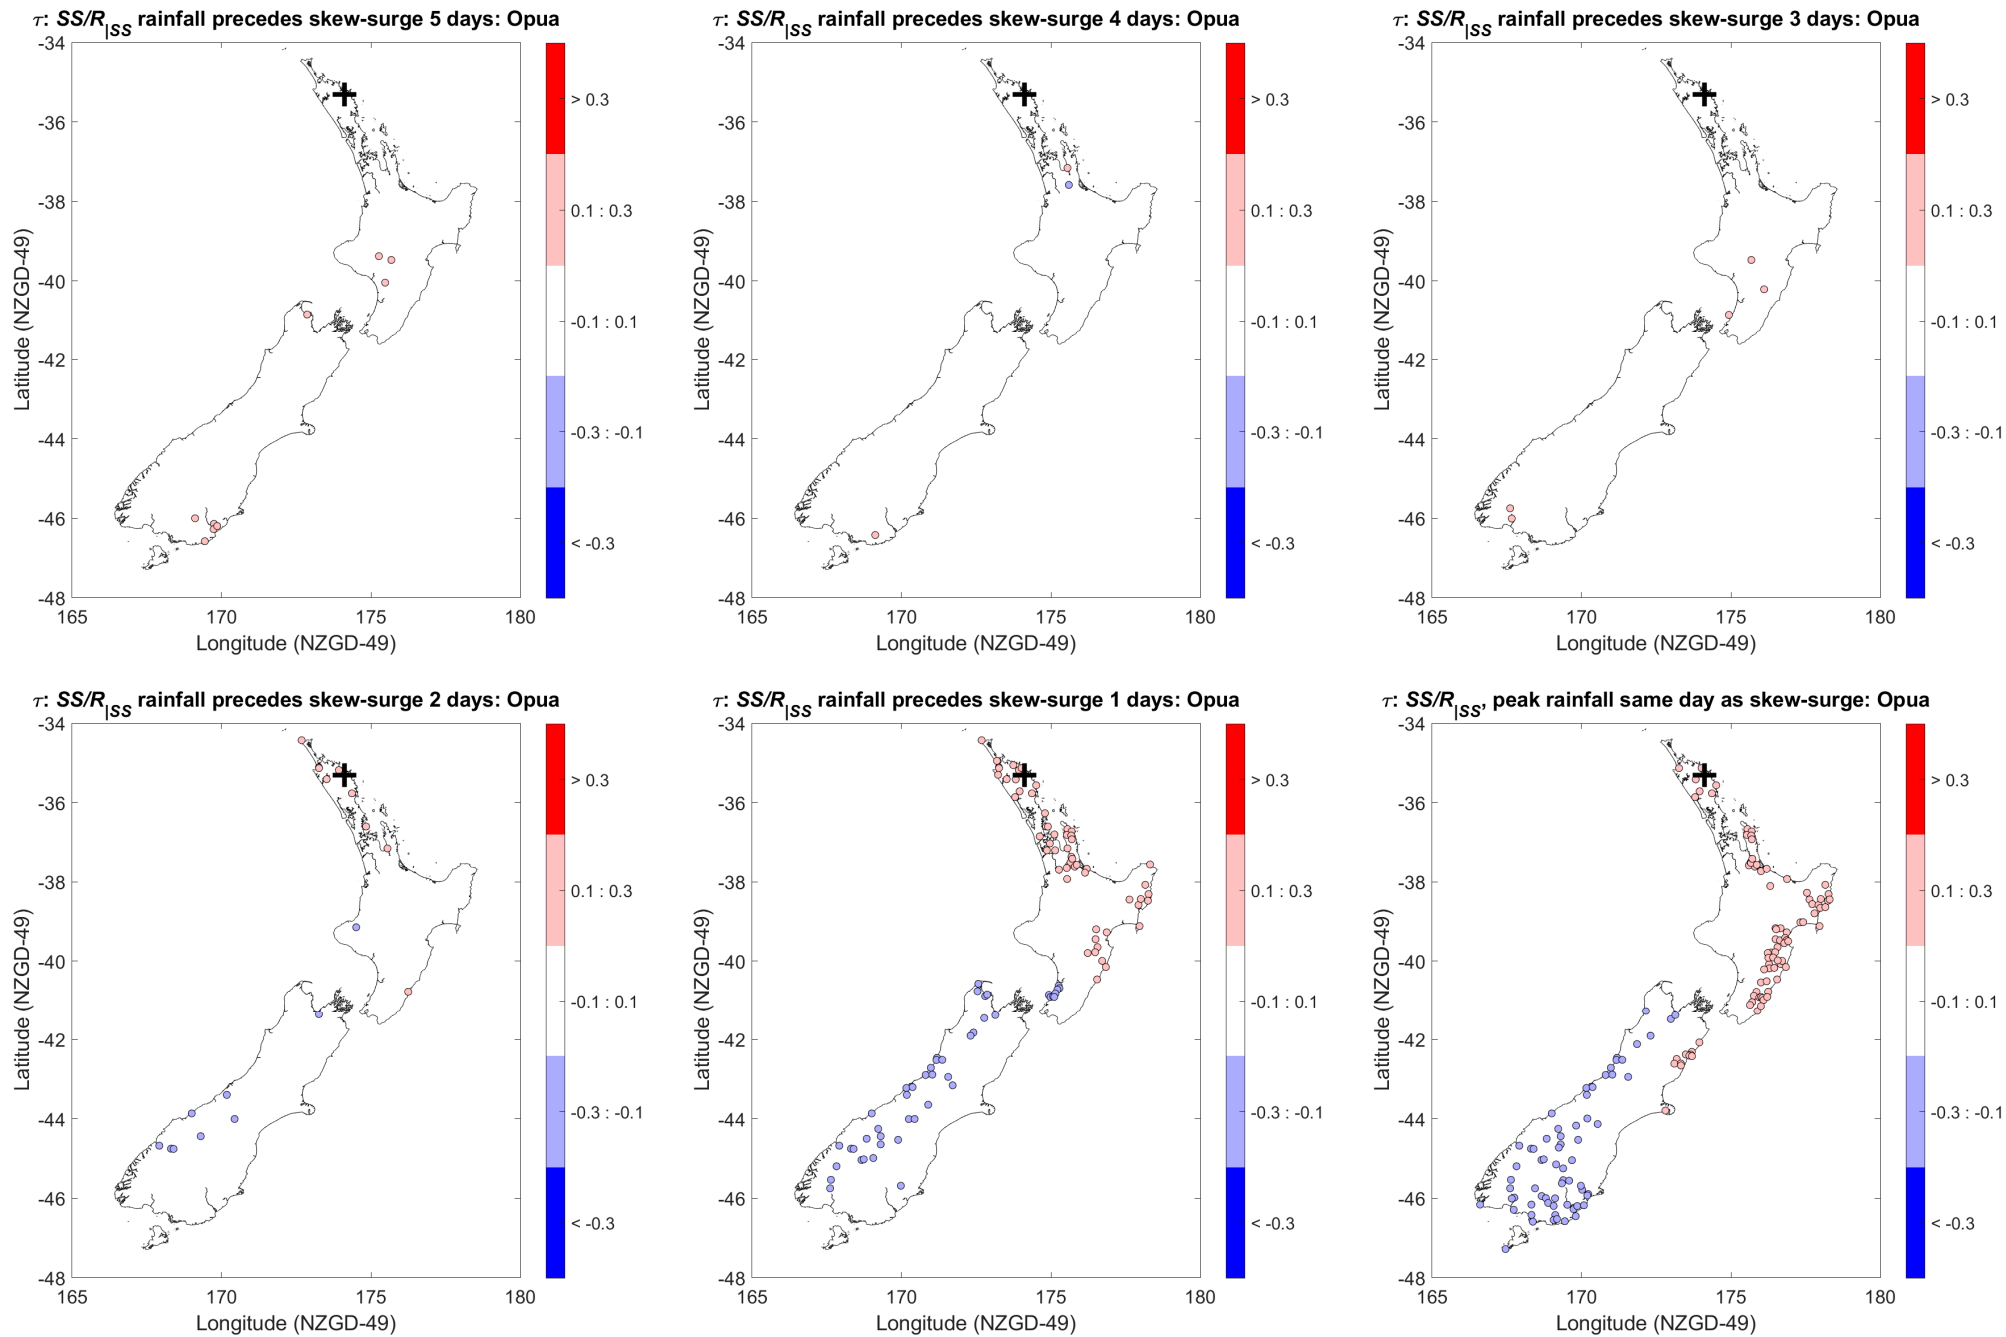

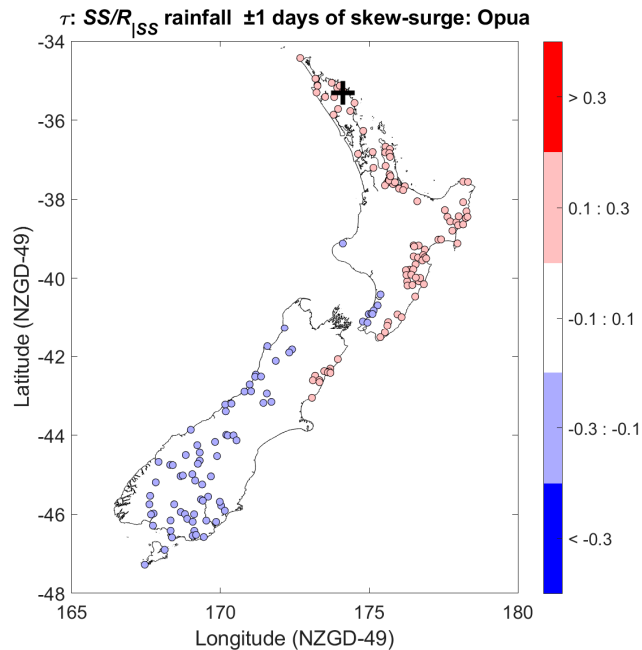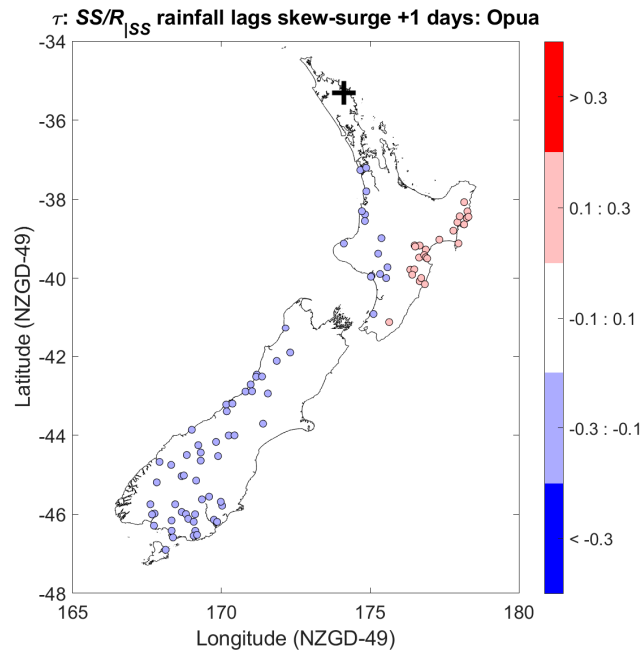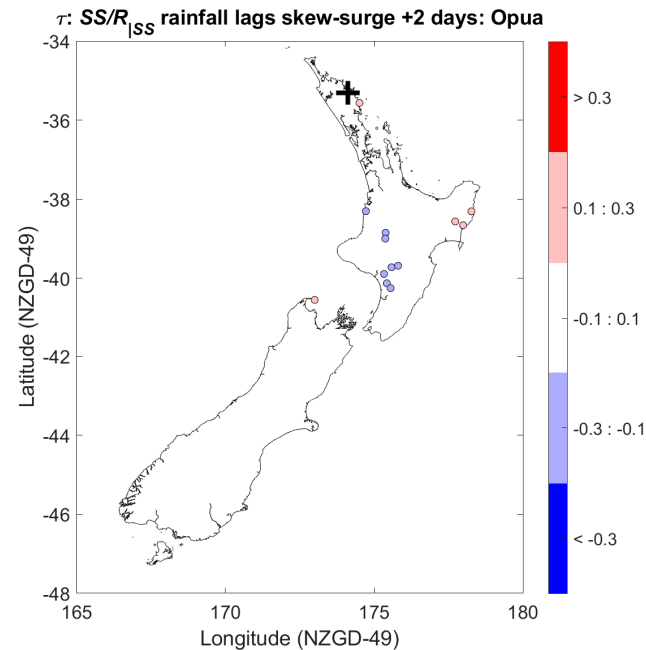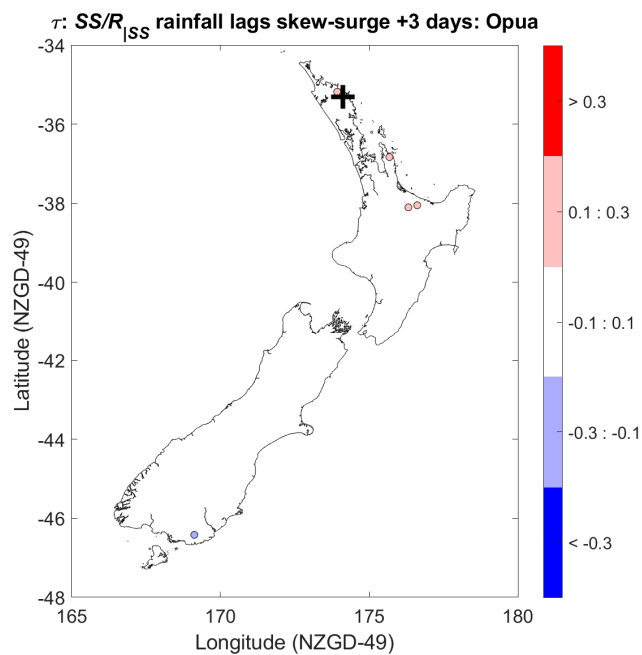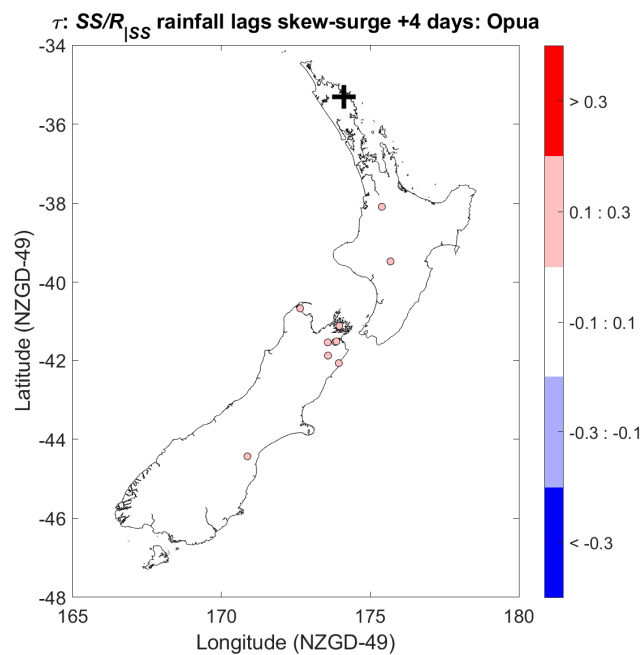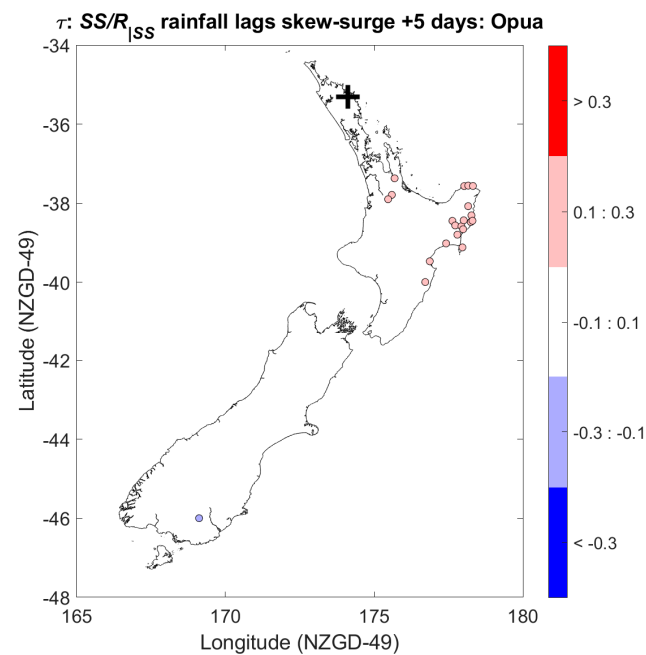

Marsden Point

$\tau$ :  $SS/R_{SS}$  rainfall precedes skew-surge 5 days: MarsdenPt

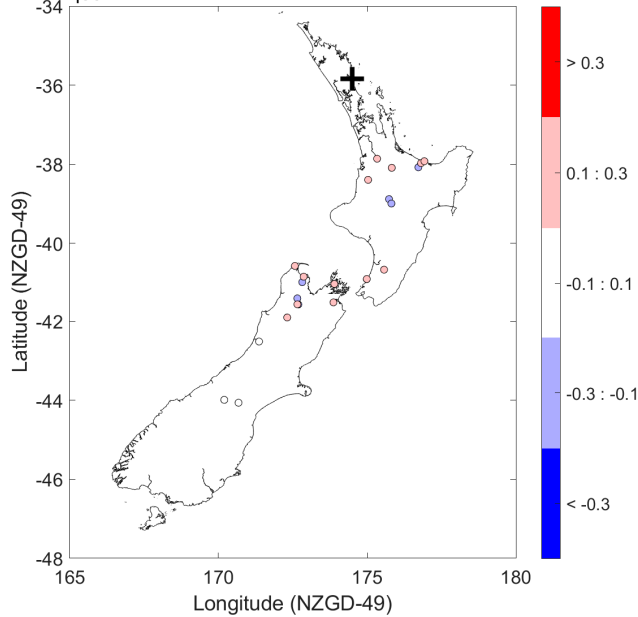

$\tau$ :  $SS/R_{SS}$  rainfall precedes skew-surge 4 days: MarsdenPt

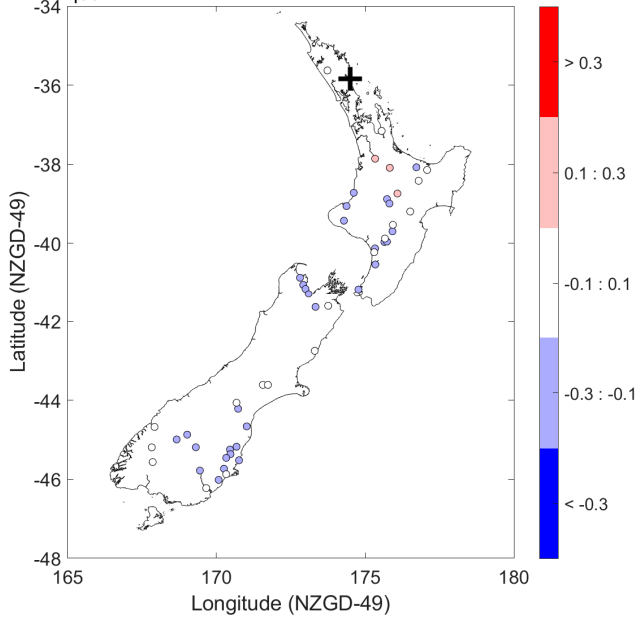

$\tau$ :  $SS/R_{SS}$  rainfall precedes skew-surge 3 days: MarsdenPt

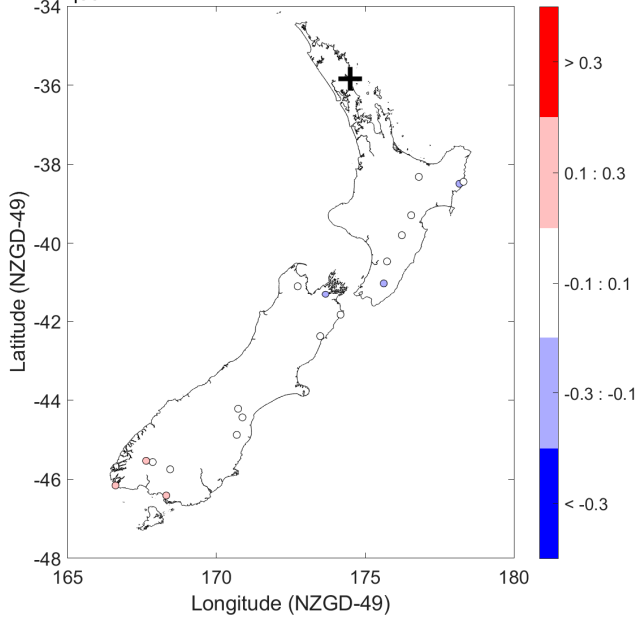

$\tau$ :  $SS/R_{SS}$  rainfall precedes skew-surge 2 days: MarsdenPt

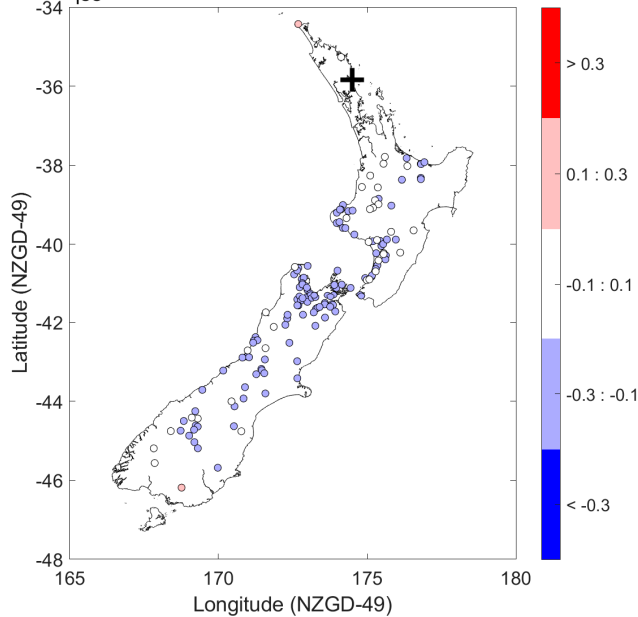

$\tau$ :  $SS/R_{SS}$  rainfall precedes skew-surge 1 days: MarsdenPt

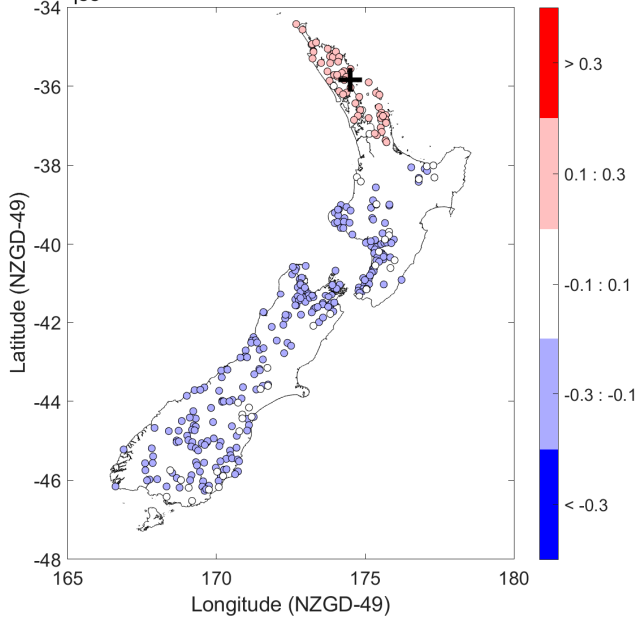

$\tau$ :  $SS/R_{SS}$  peak rainfall same day as skew-surge: MarsdenPt

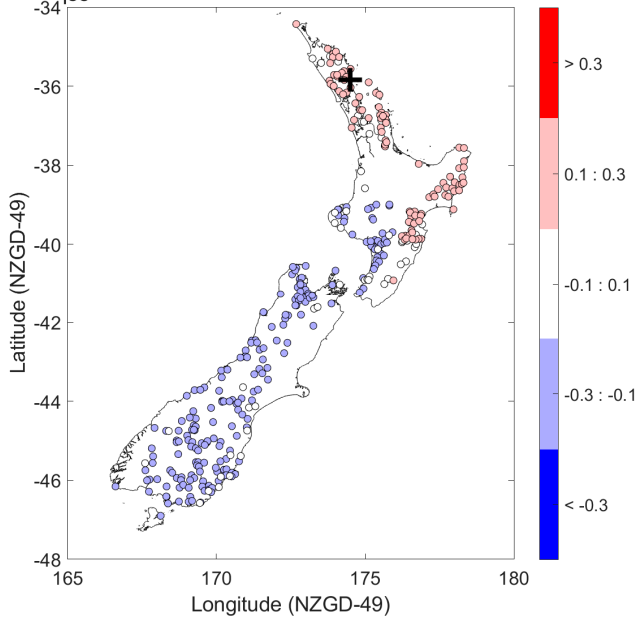



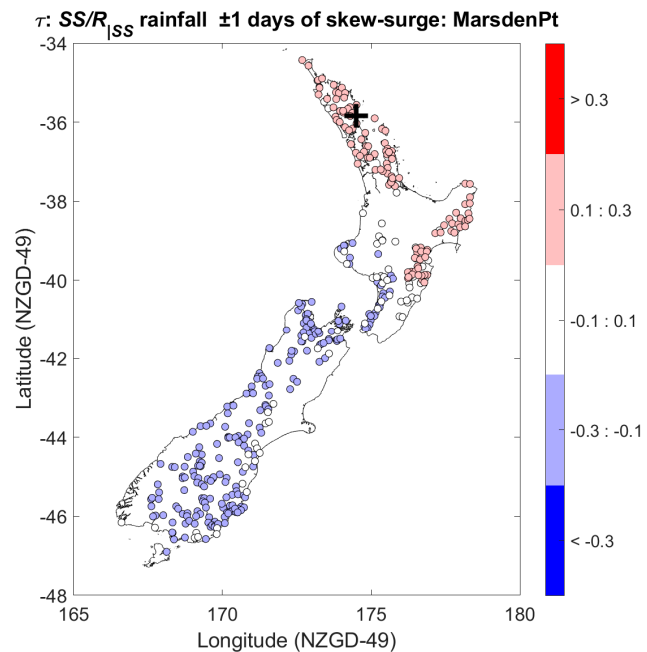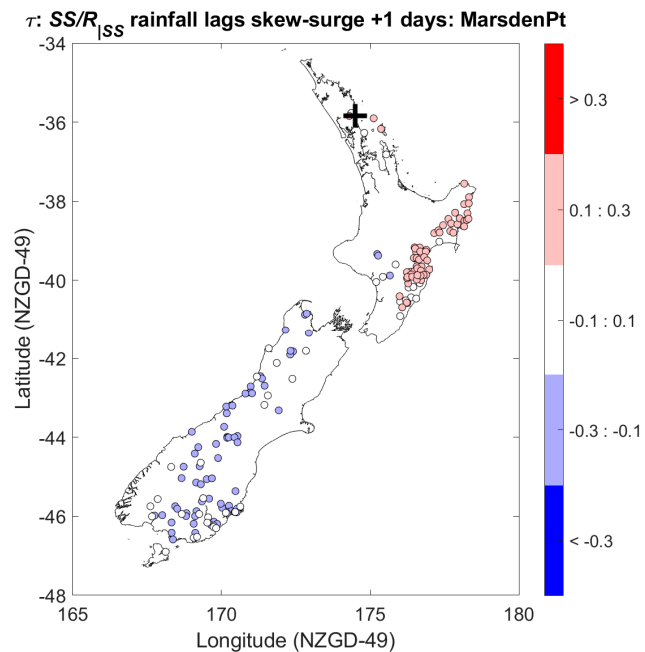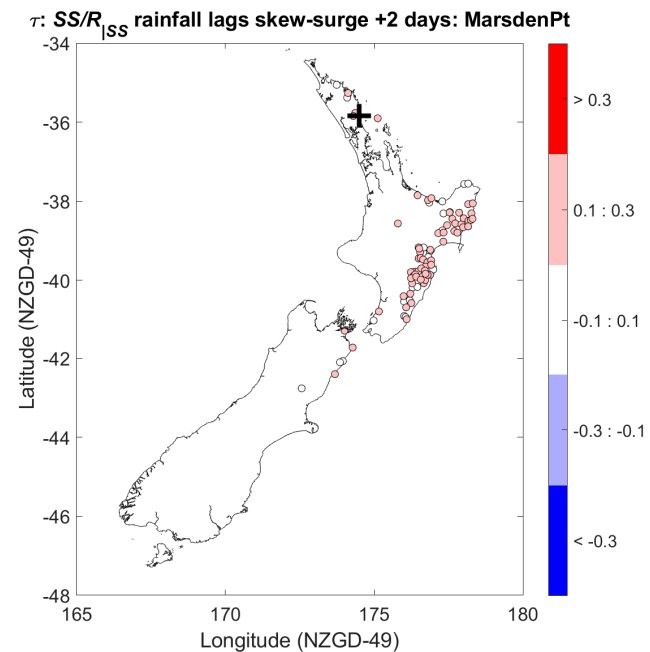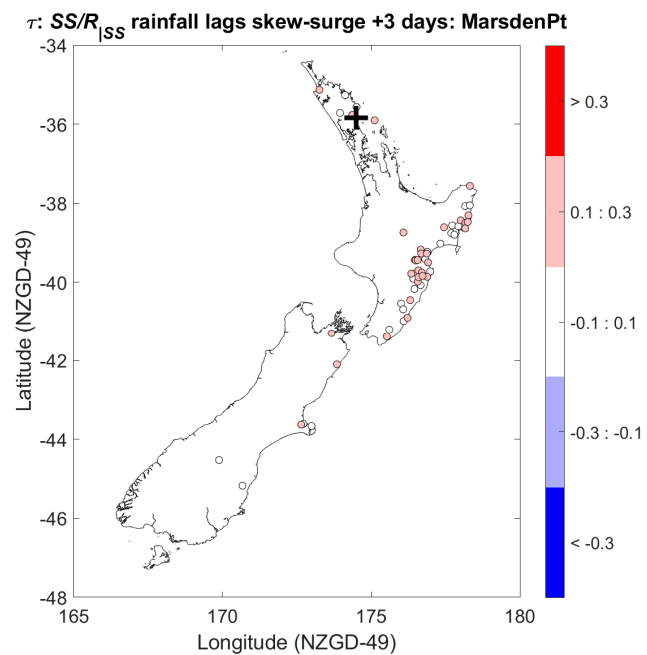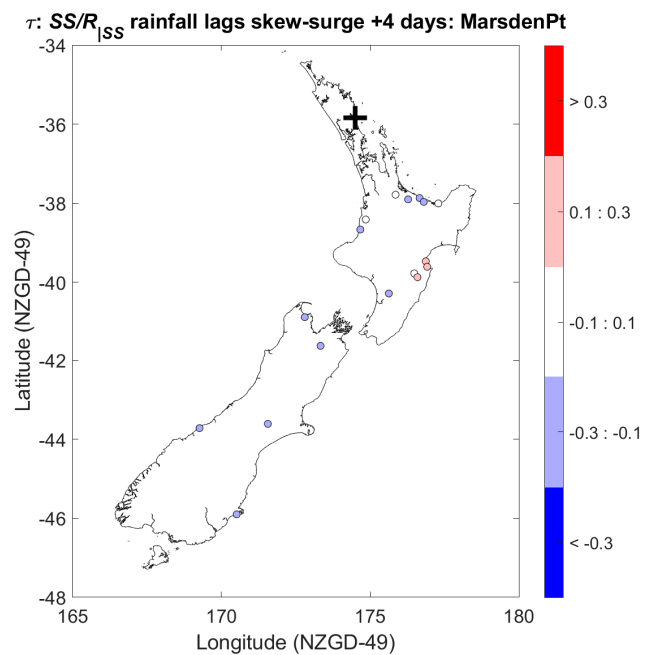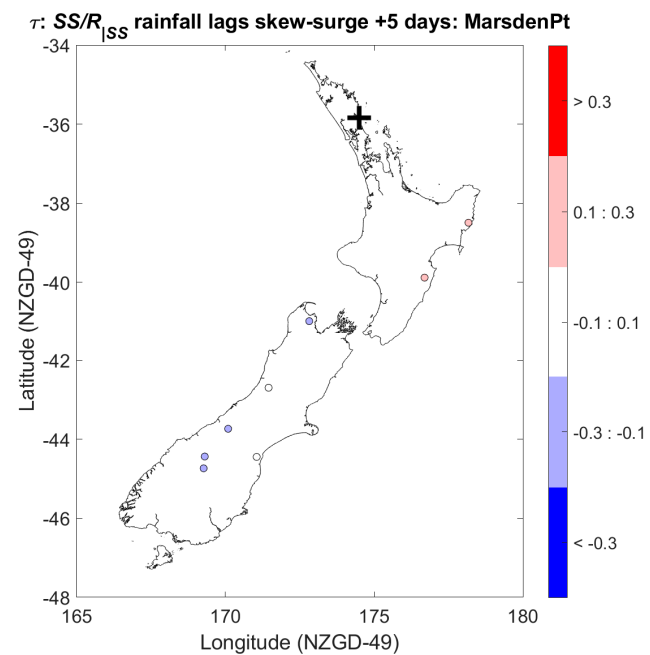

Auckland

$\tau$ :  $SS/R_{ISS}$  rainfall precedes skew-surge 5 days: Auckland

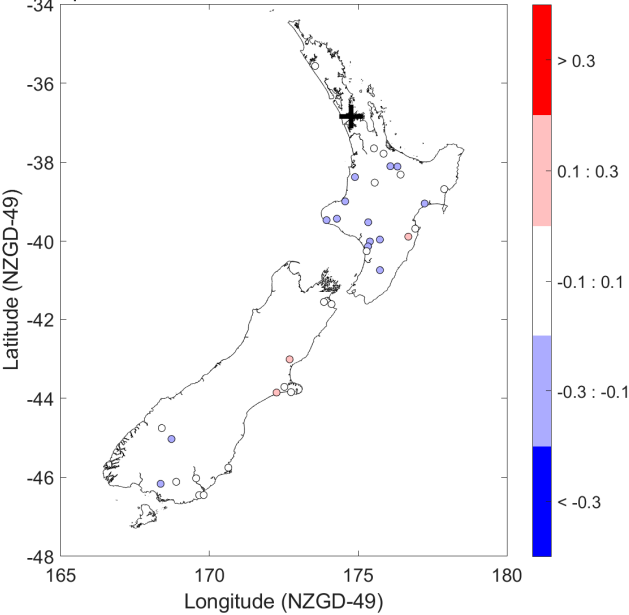

$\tau$ :  $SS/R_{ISS}$  rainfall precedes skew-surge 4 days: Auckland

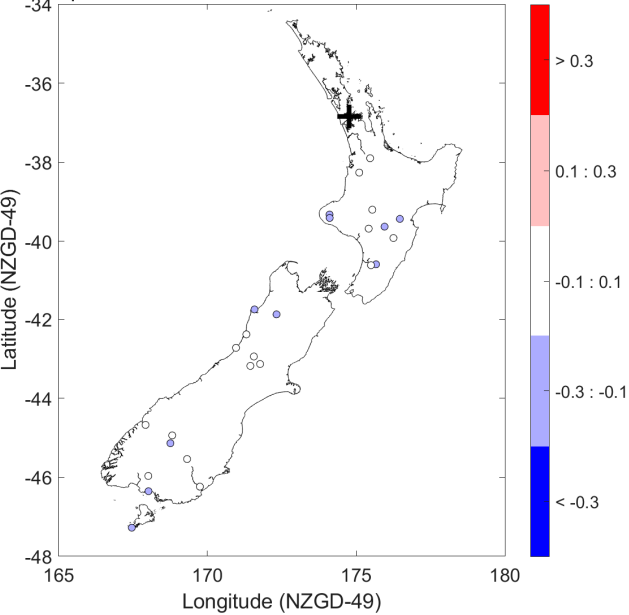

$\tau$ :  $SS/R_{ISS}$  rainfall precedes skew-surge 3 days: Auckland

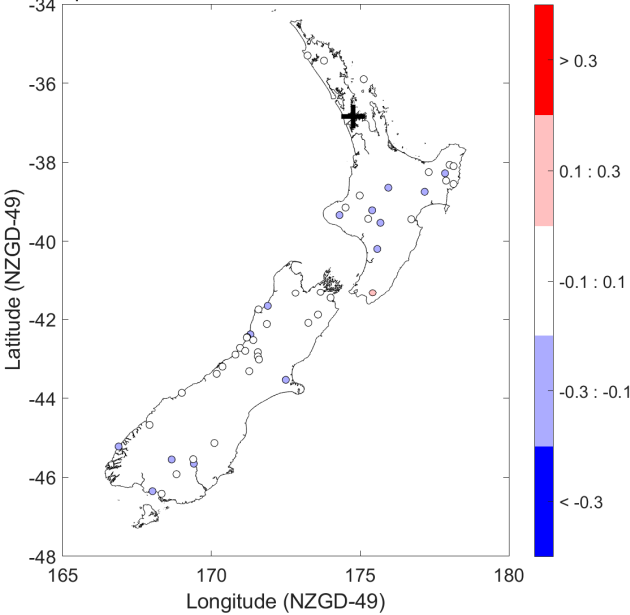

$\tau$ :  $SS/R_{ISS}$  rainfall precedes skew-surge 2 days: Auckland

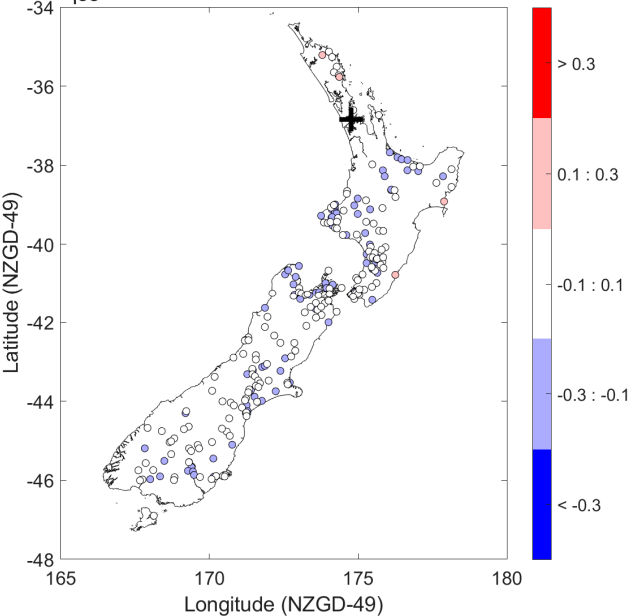

$\tau$ :  $SS/R_{ISS}$  rainfall precedes skew-surge 1 days: Auckland

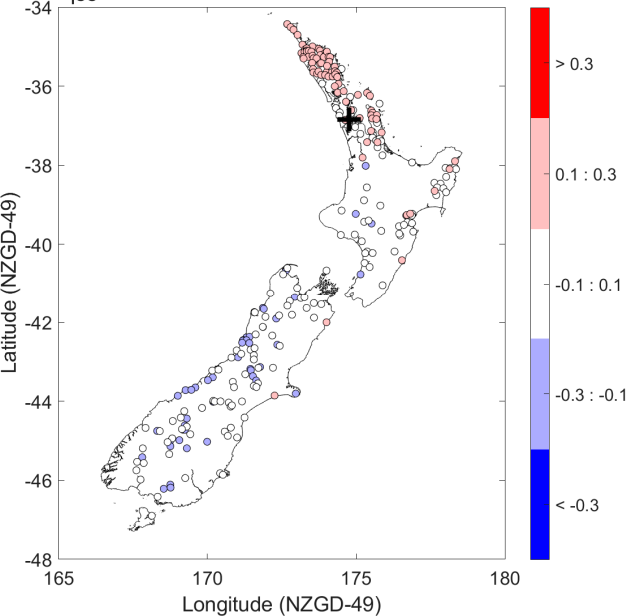

$\tau$ :  $SS/R_{ISS}$  peak rainfall same day as skew-surge: Auckland

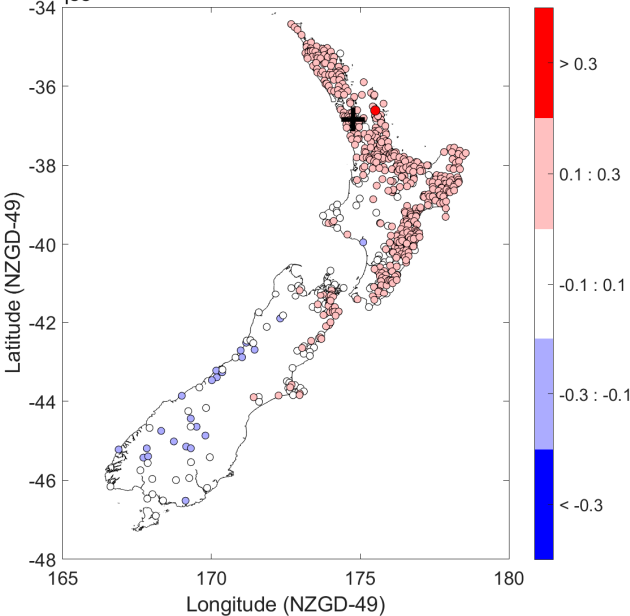

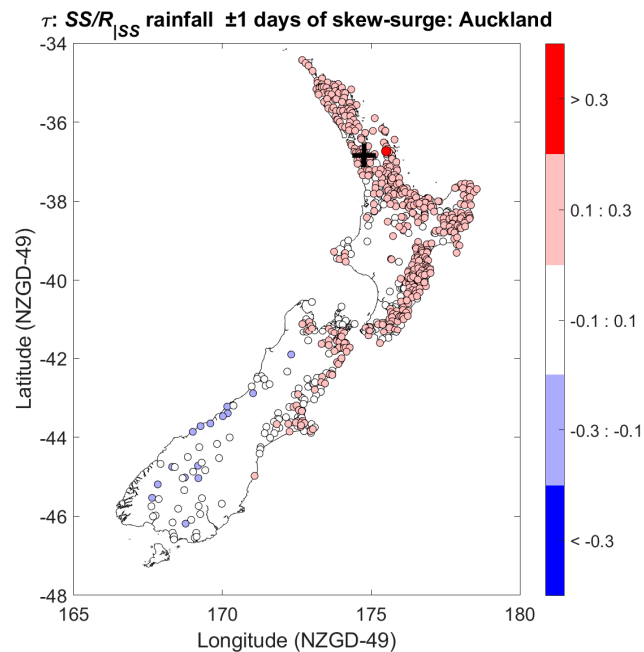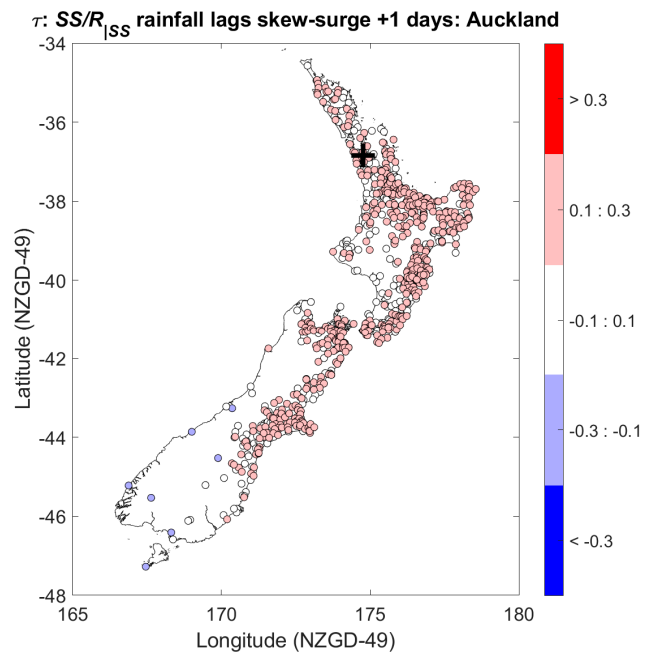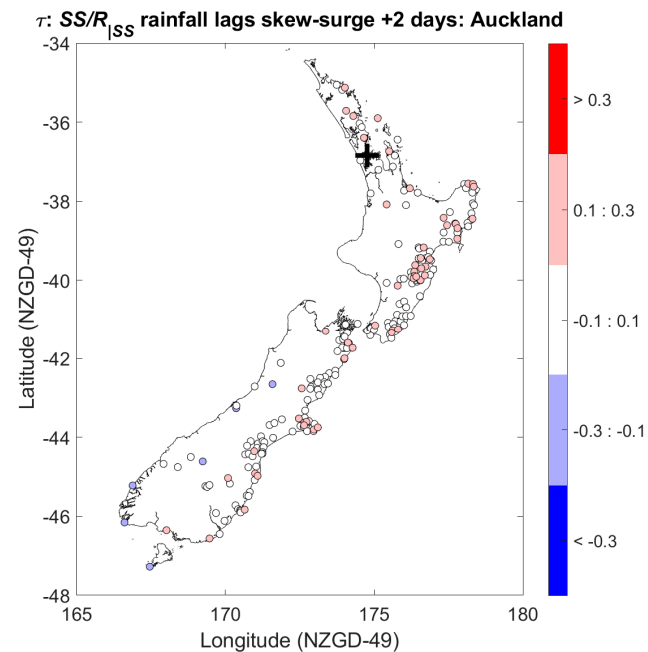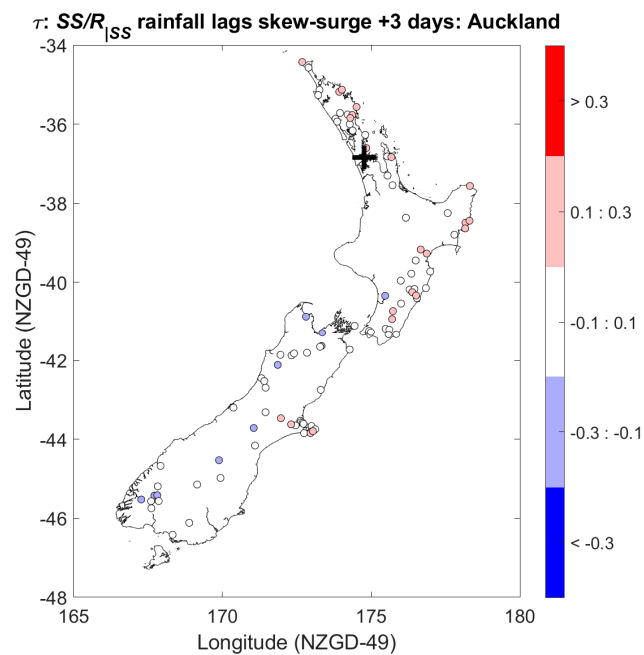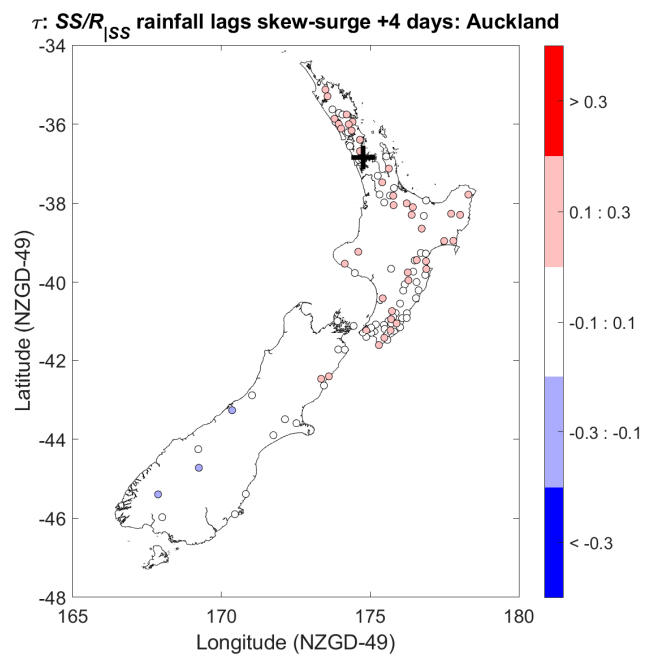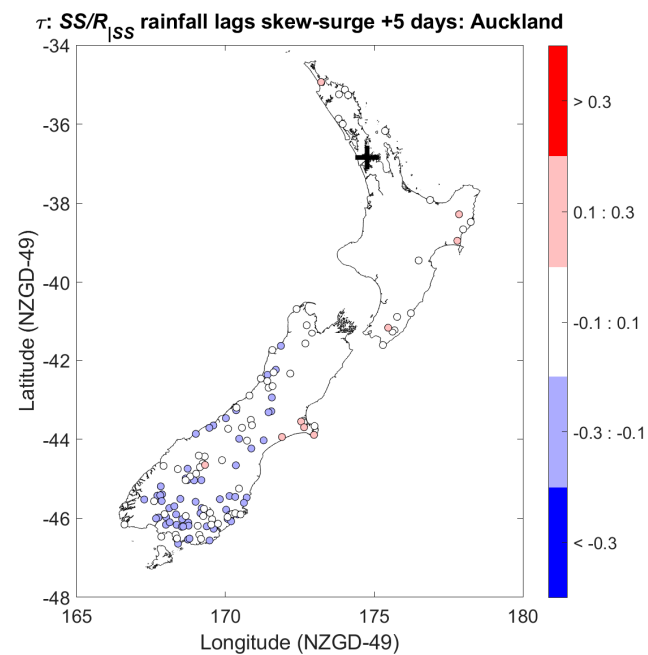

Tararu

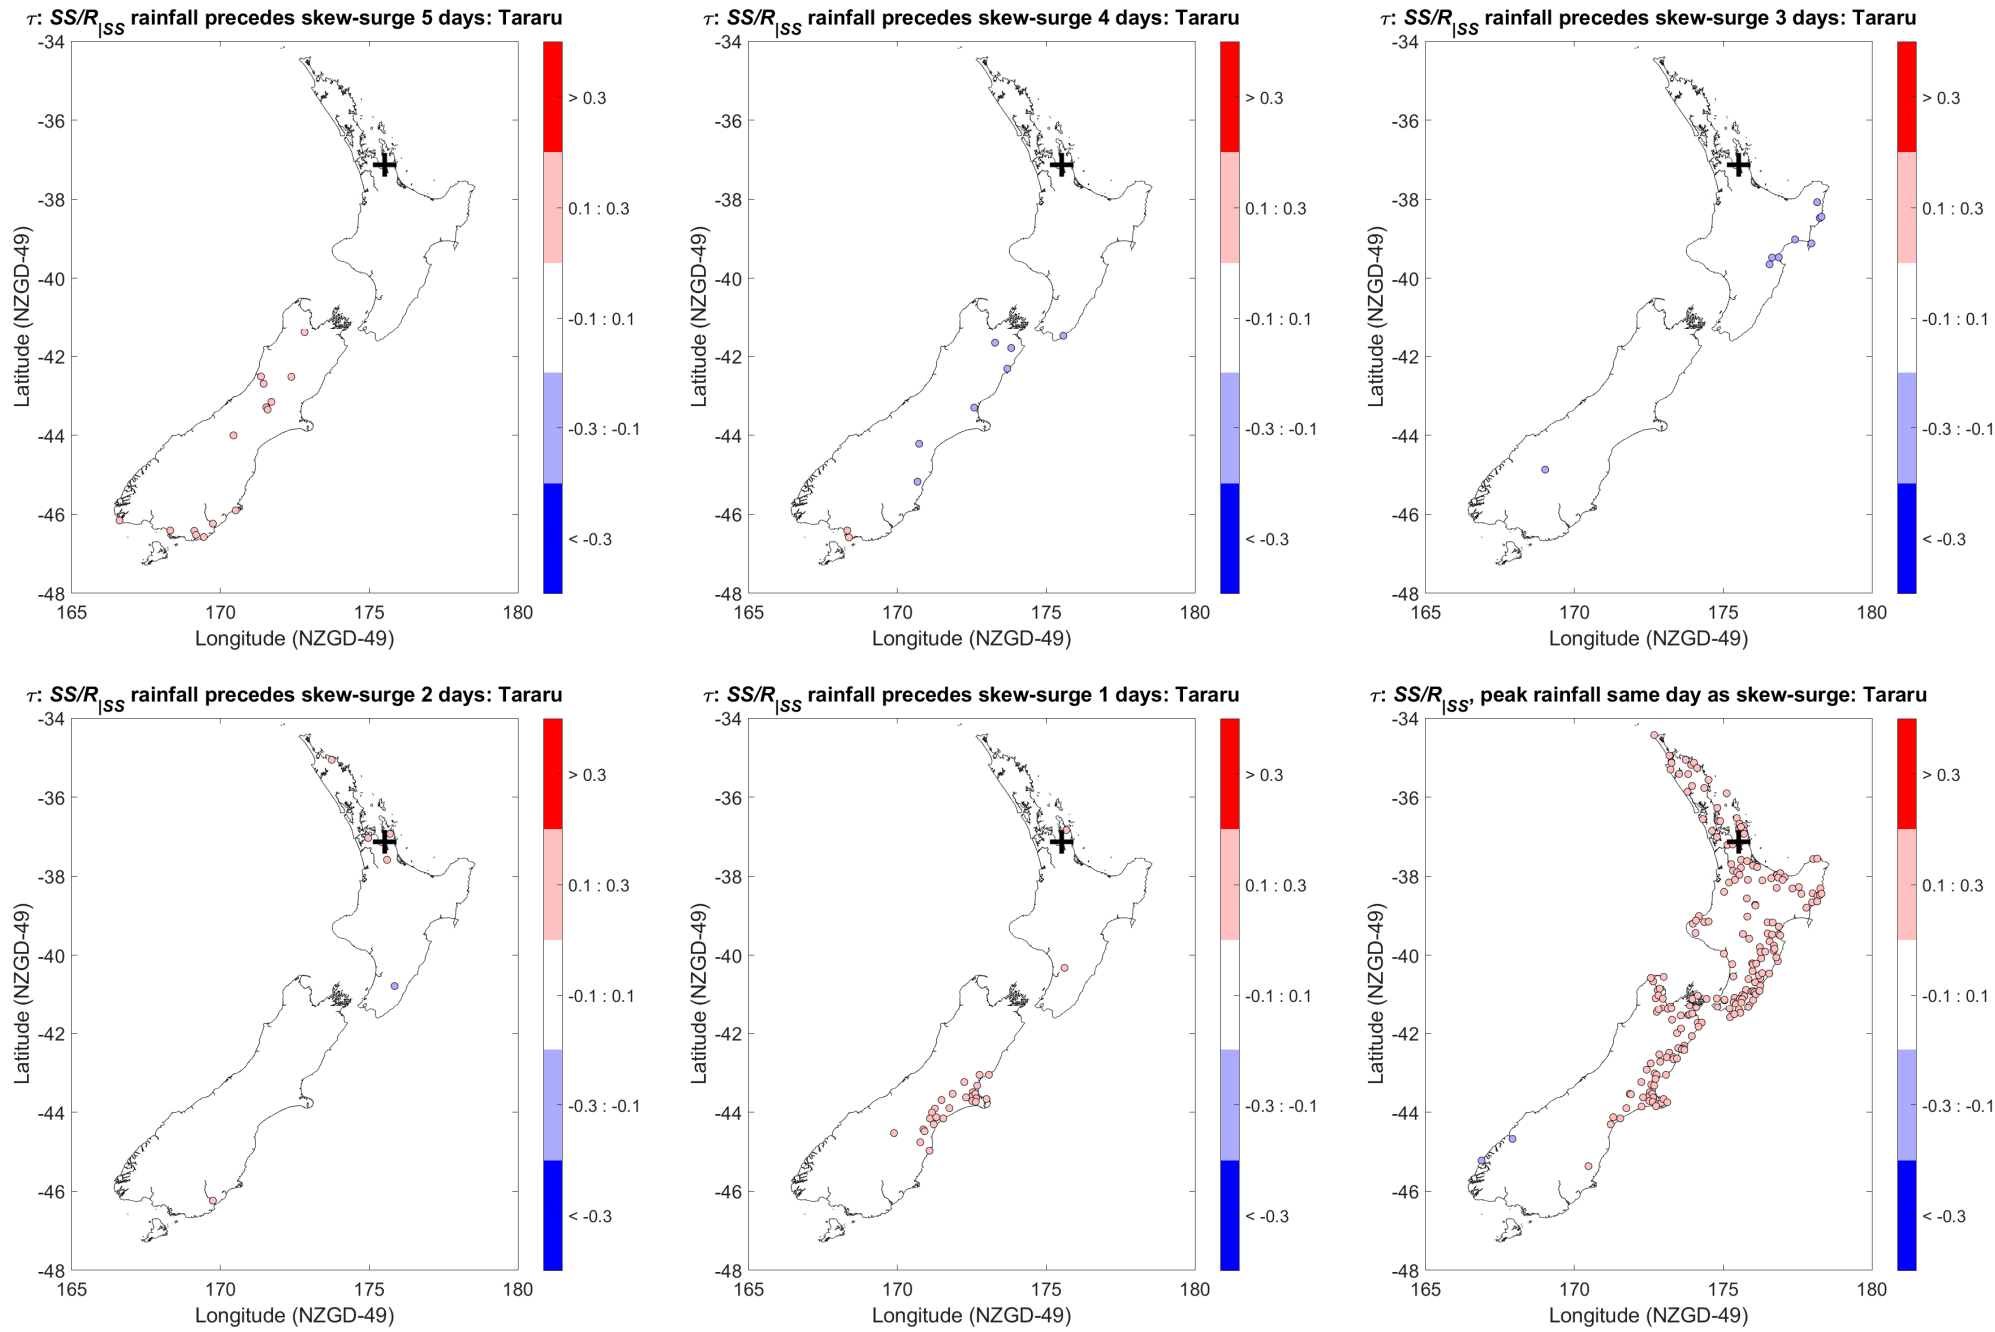

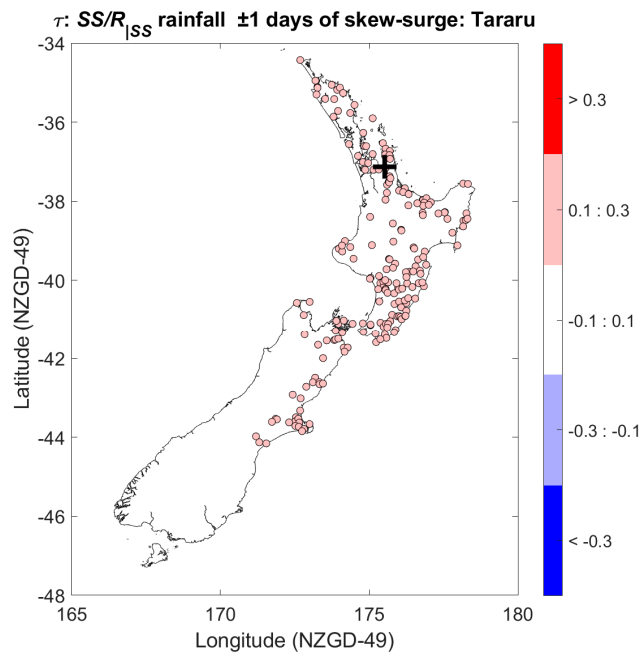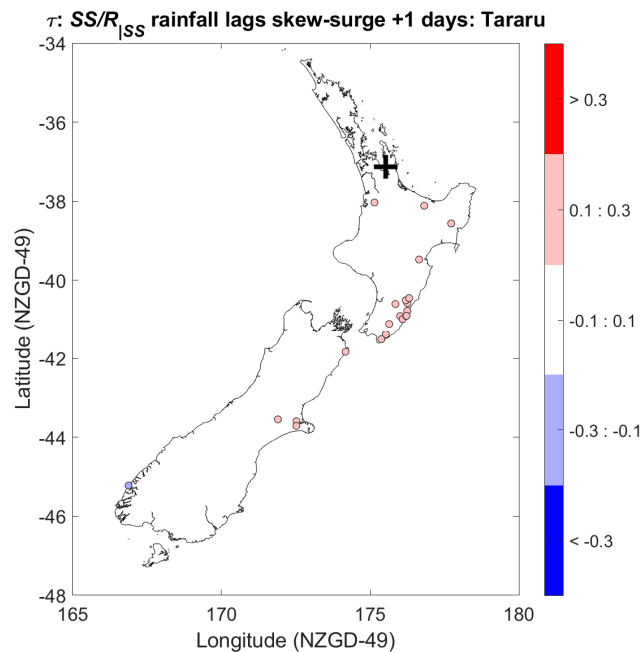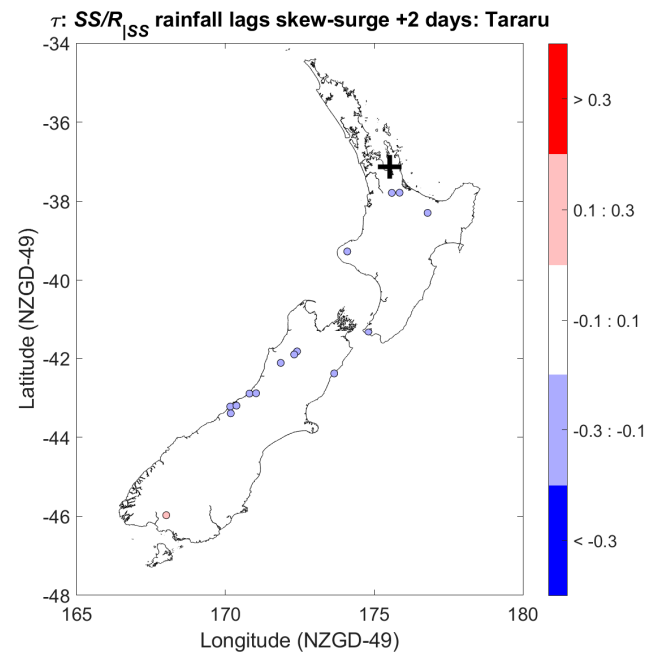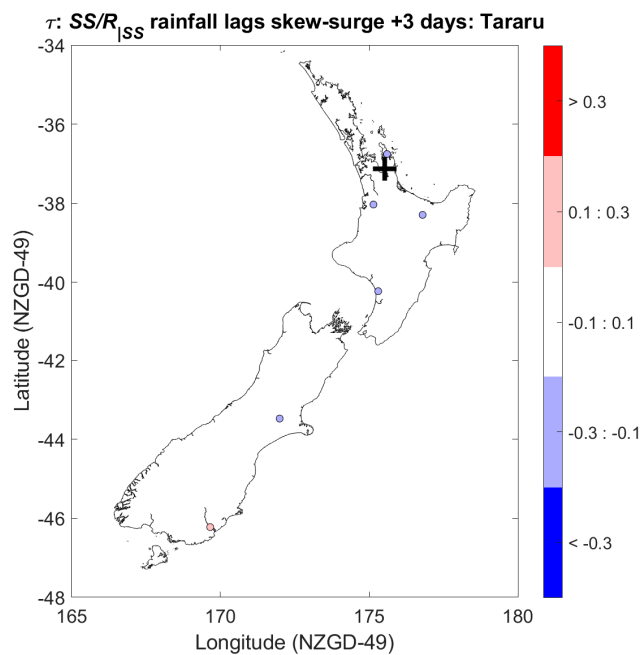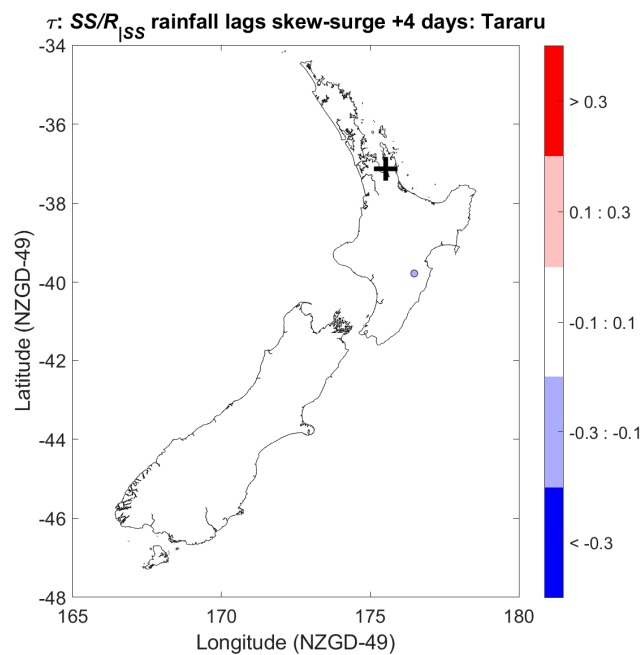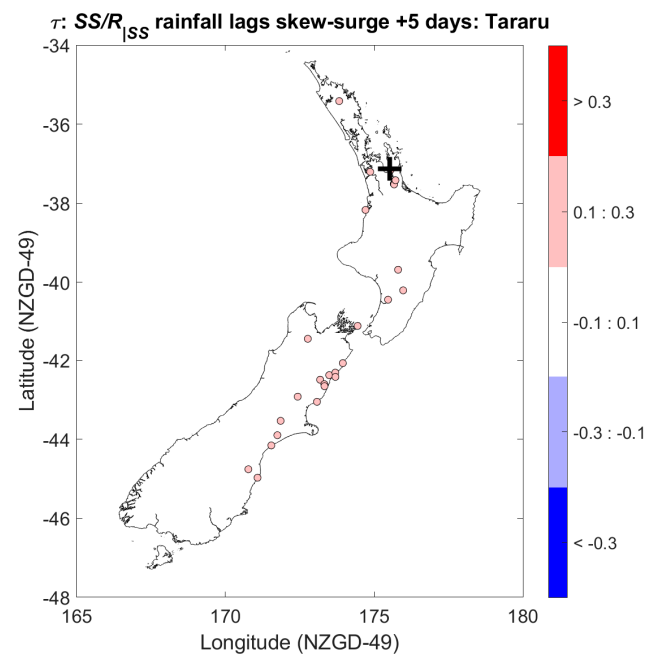

Moturiki

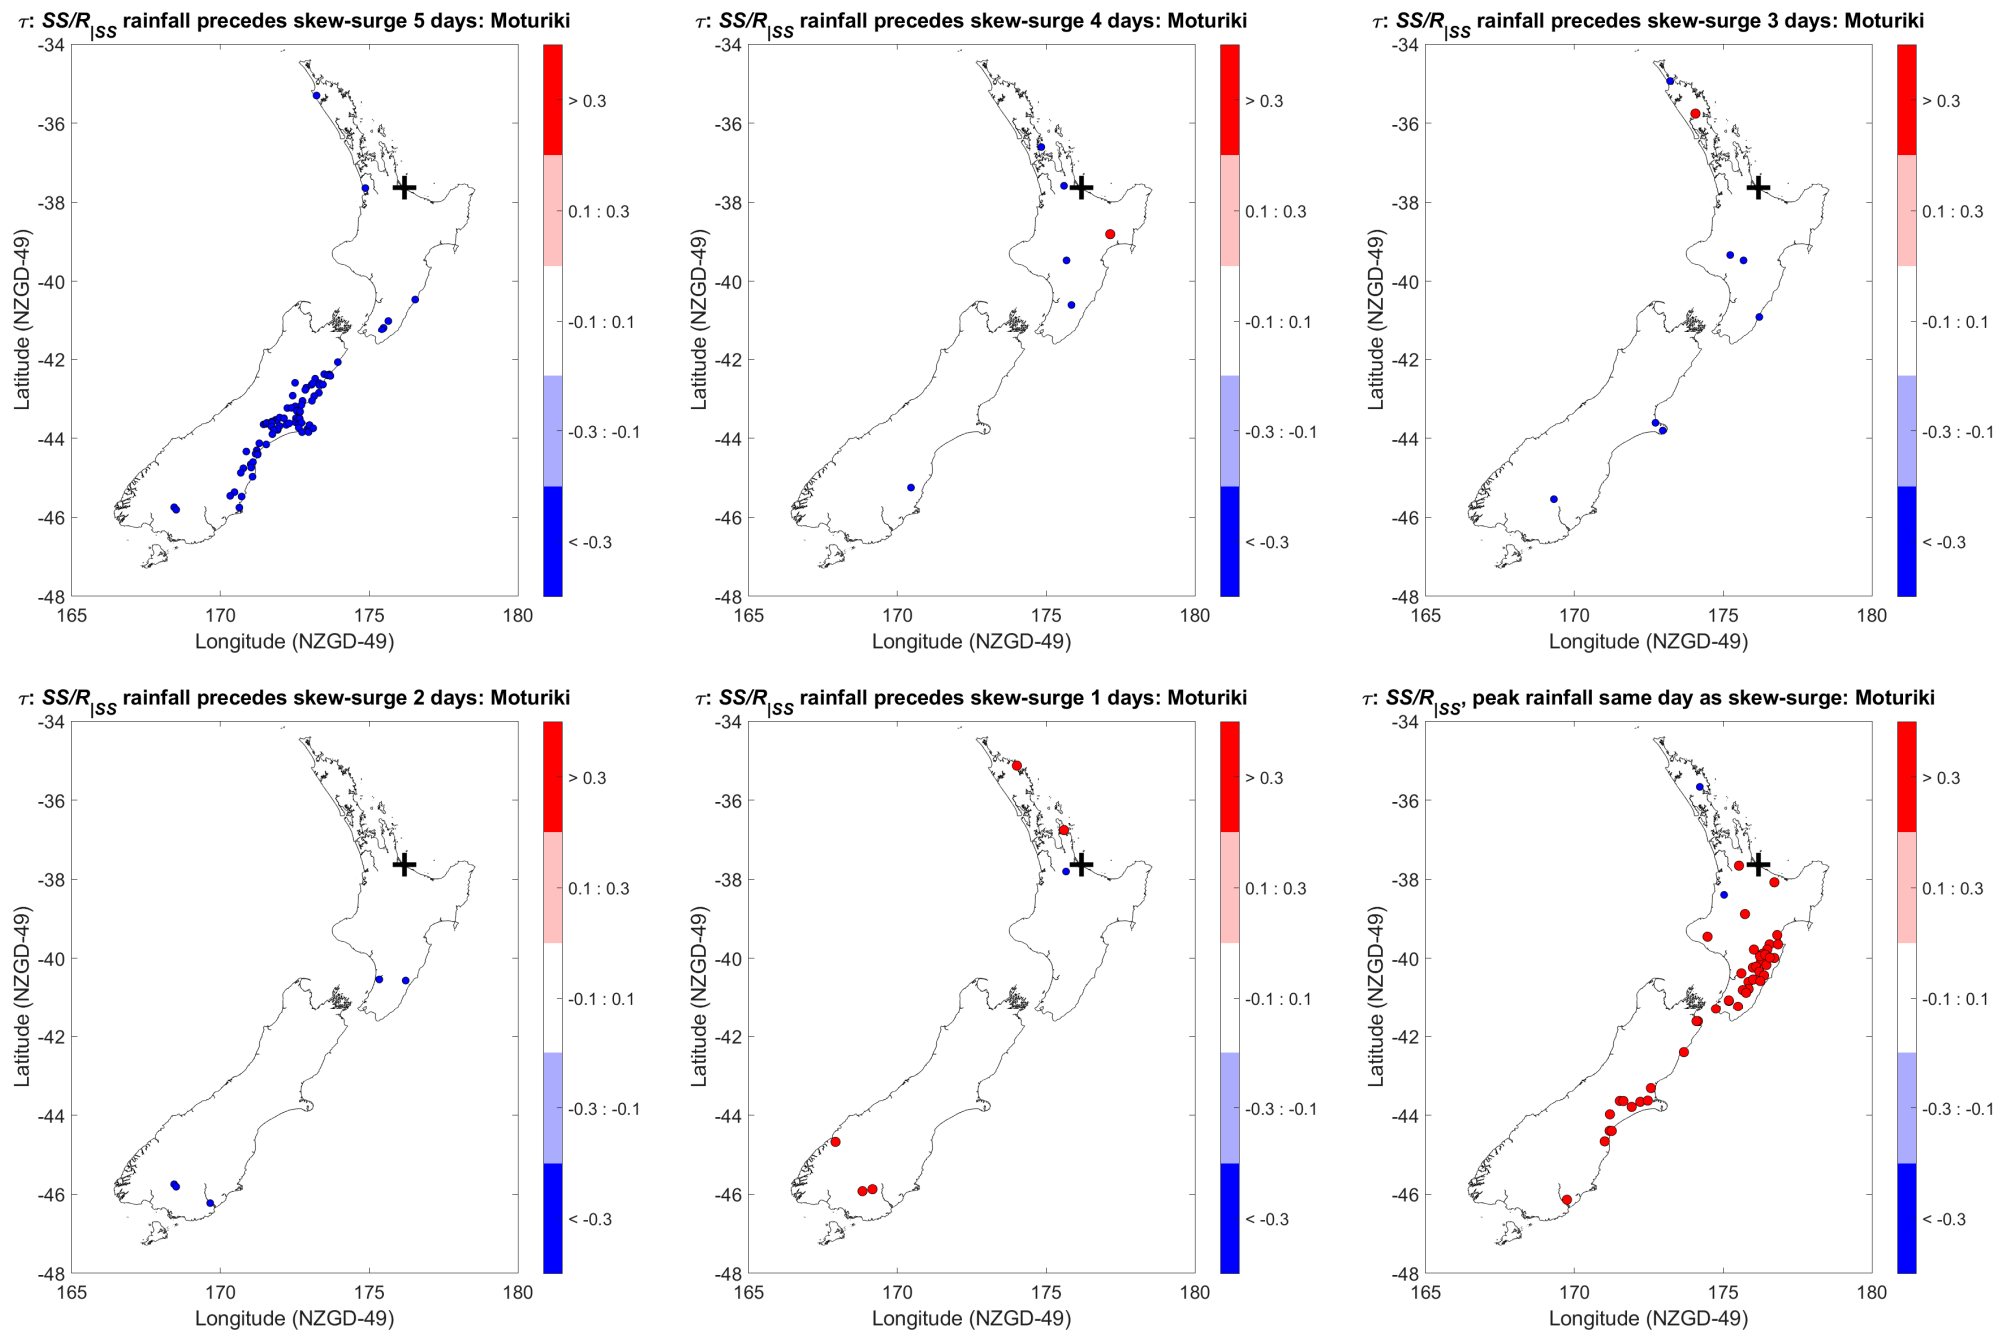

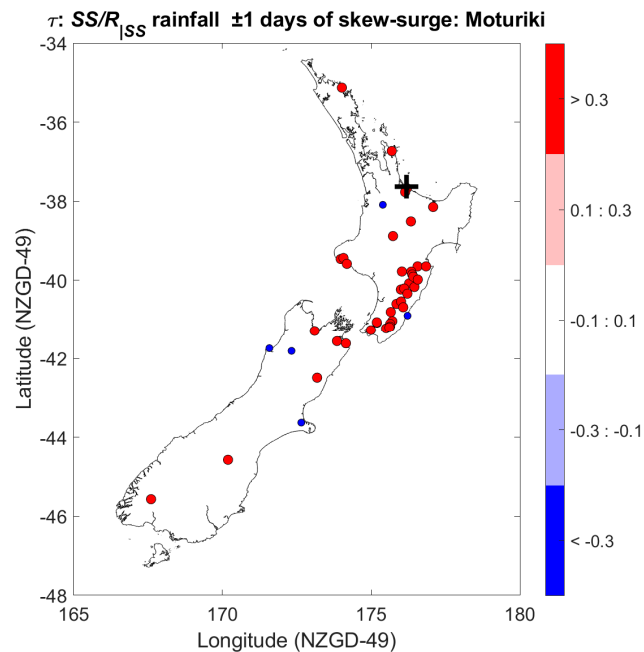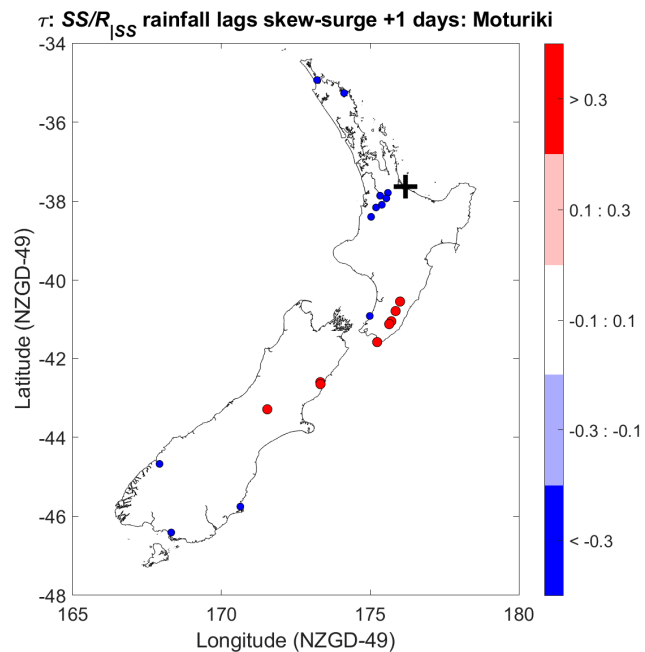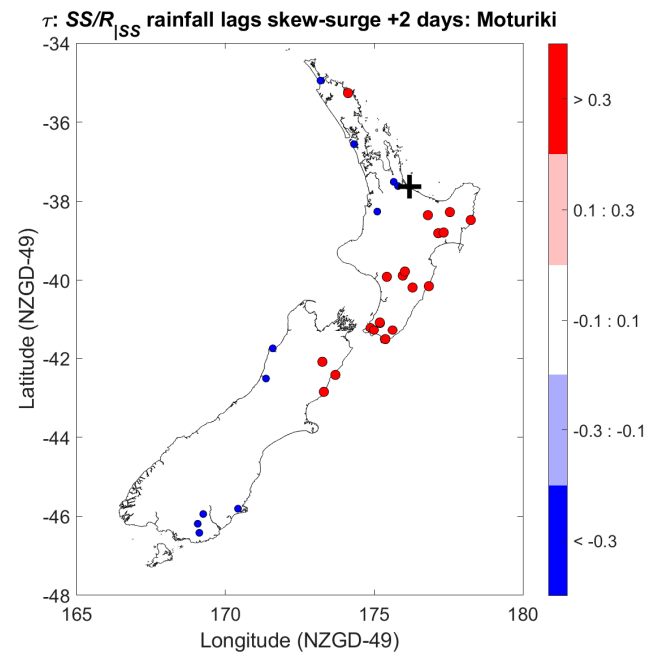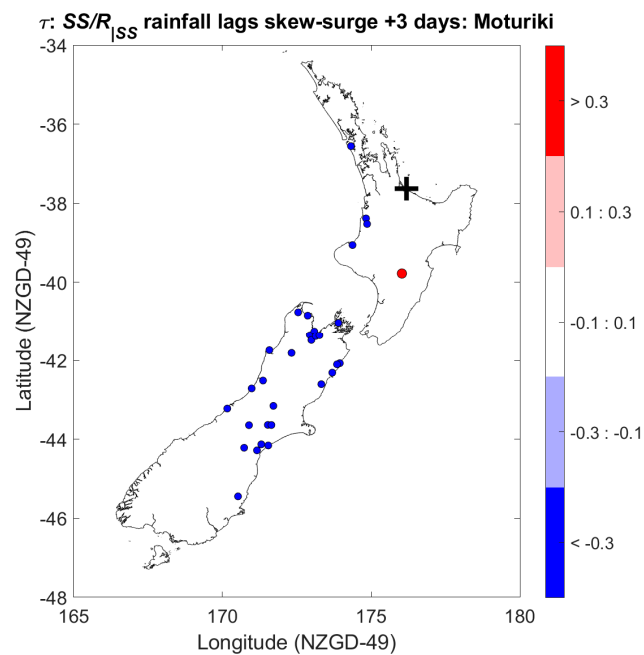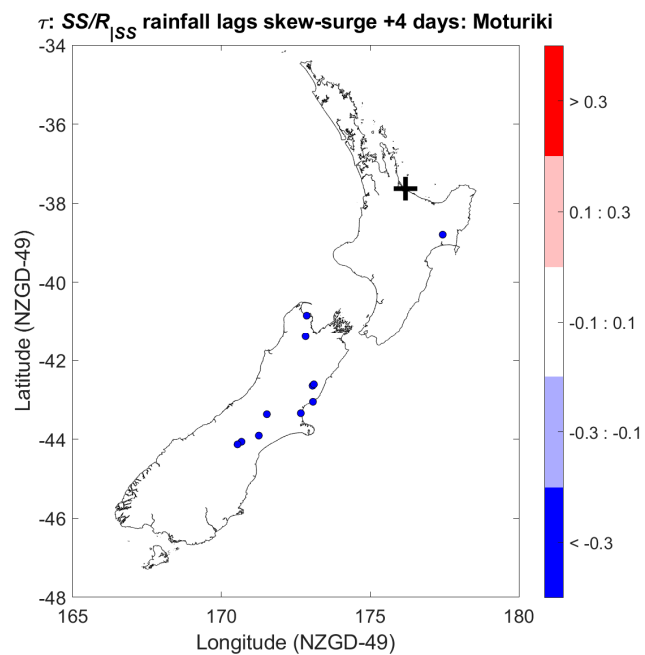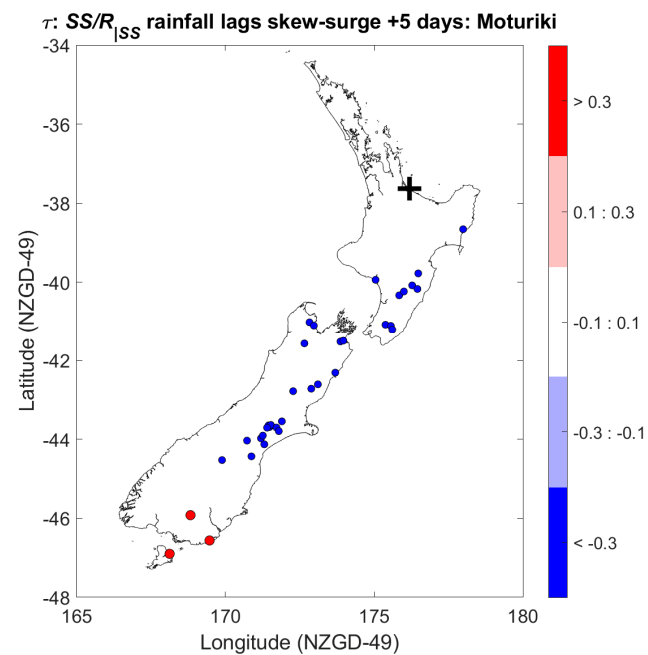

Taranaki

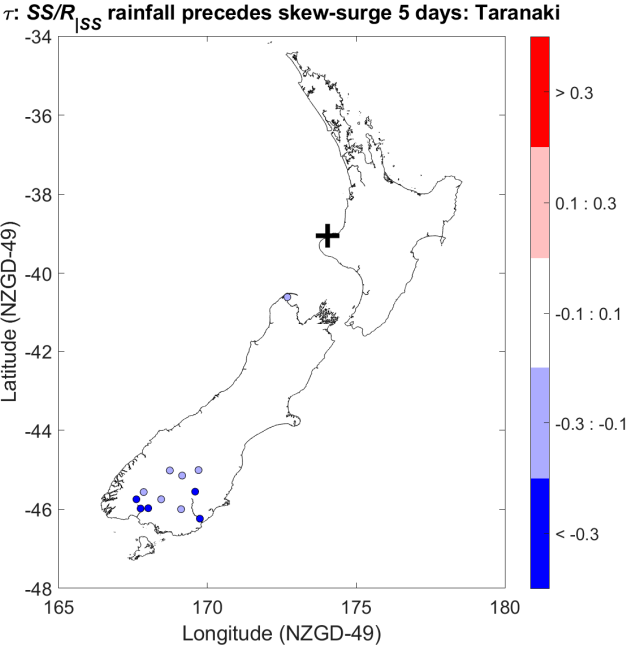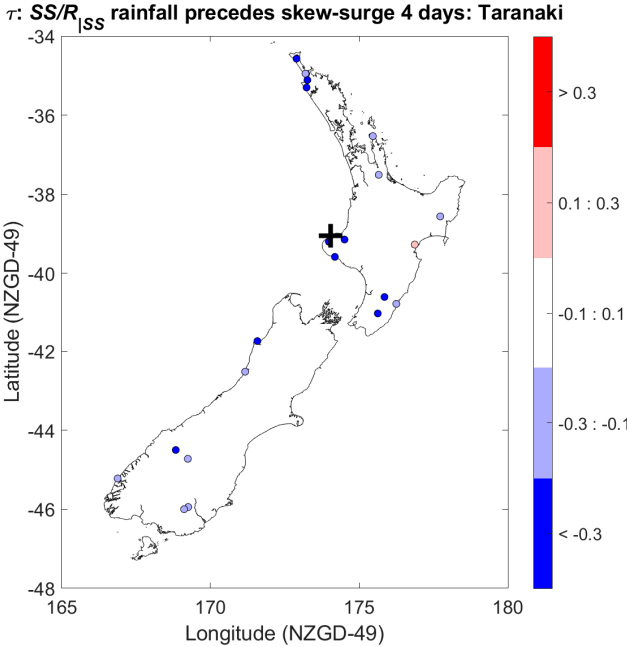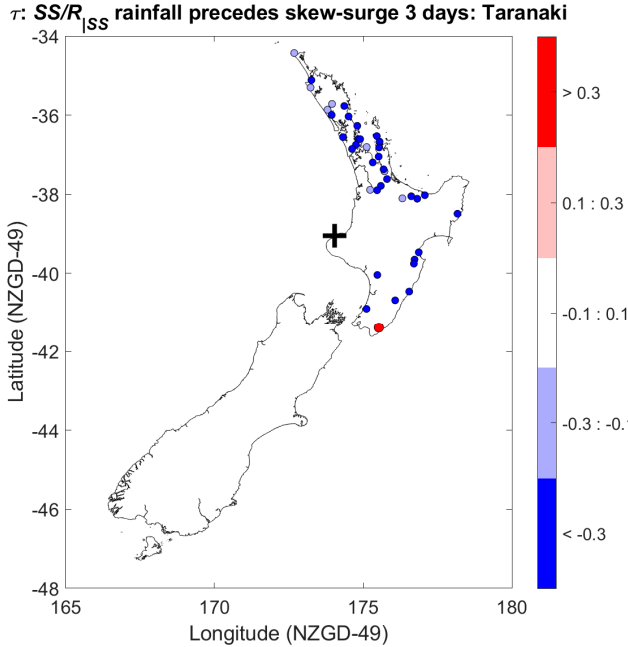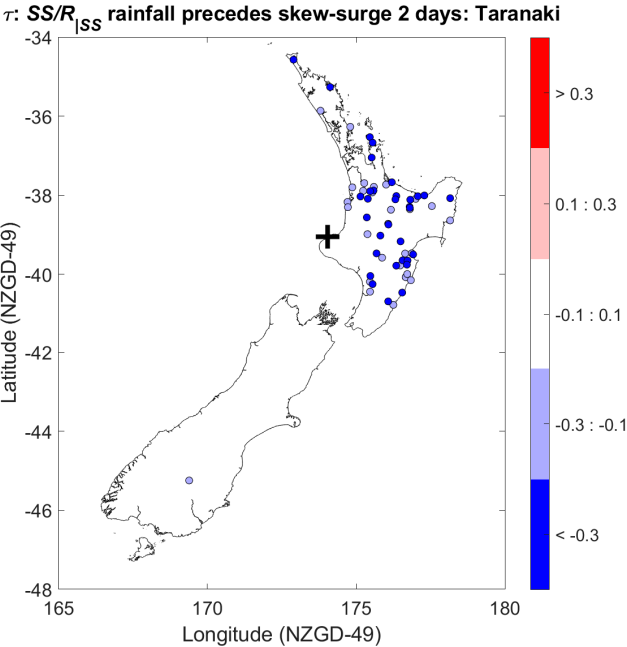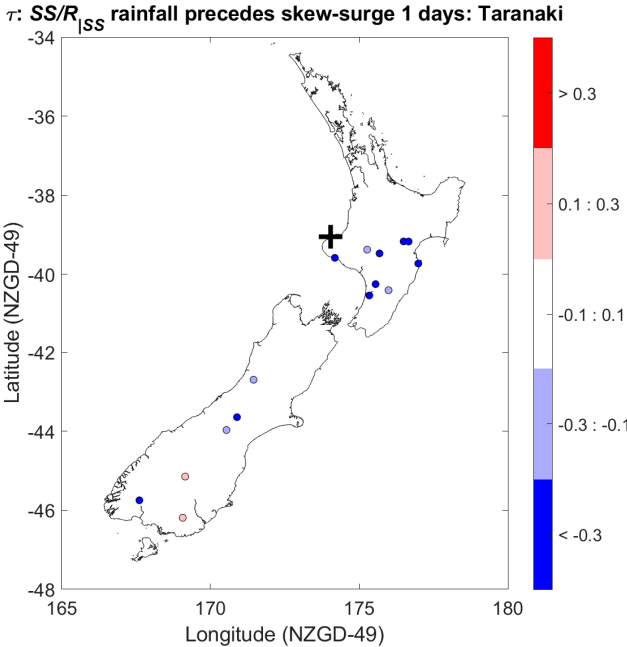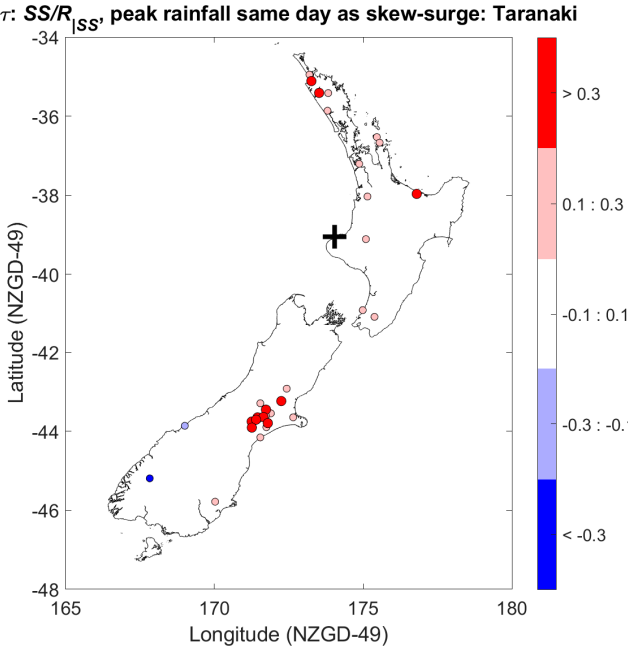



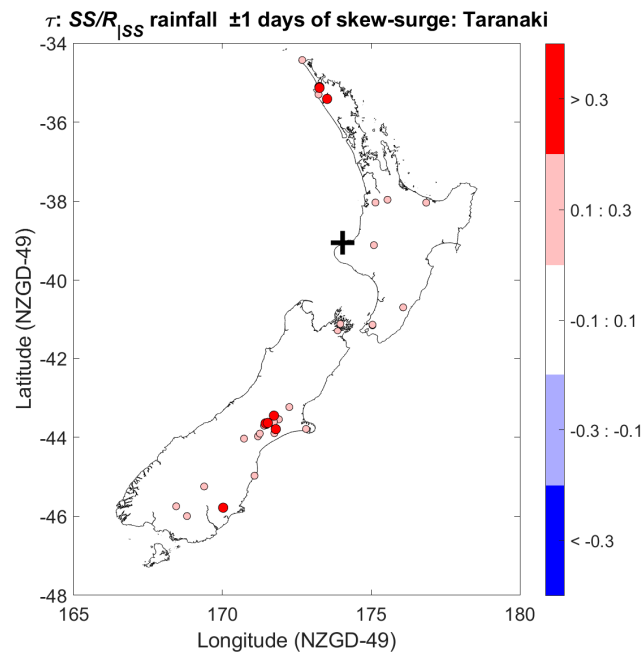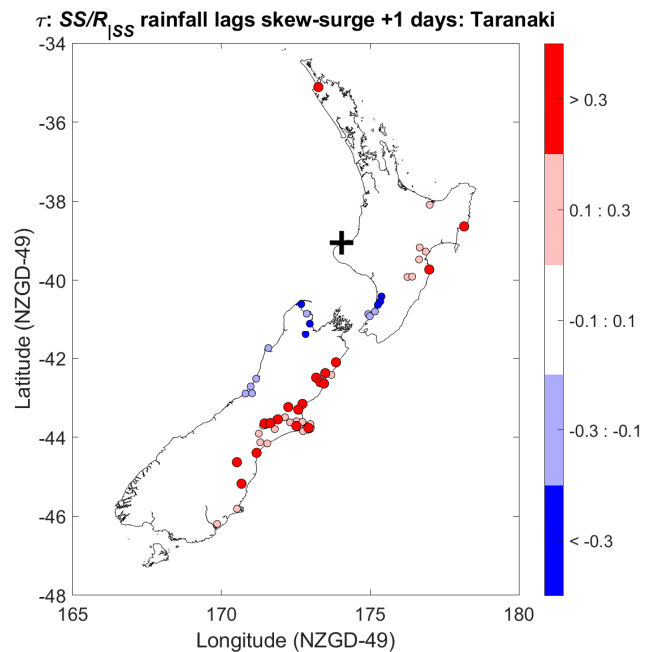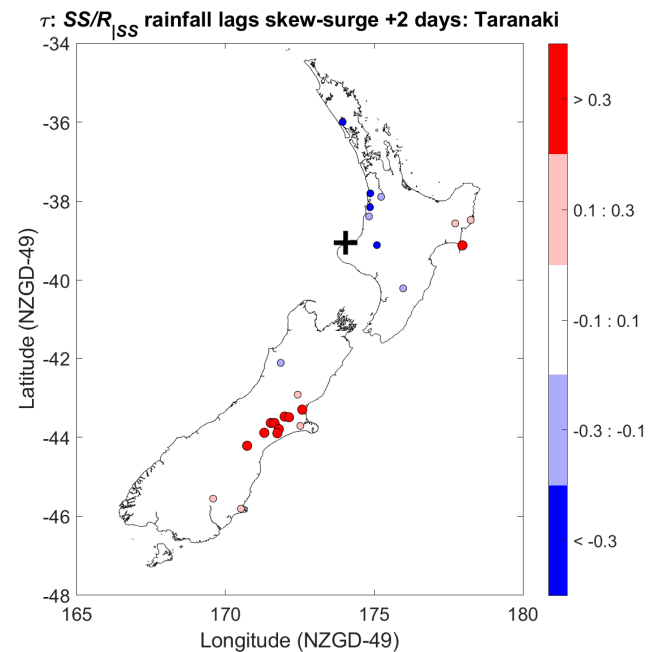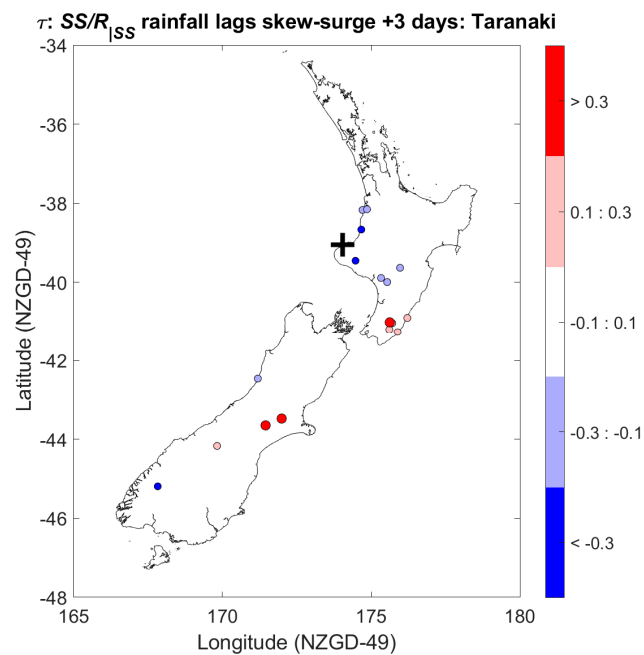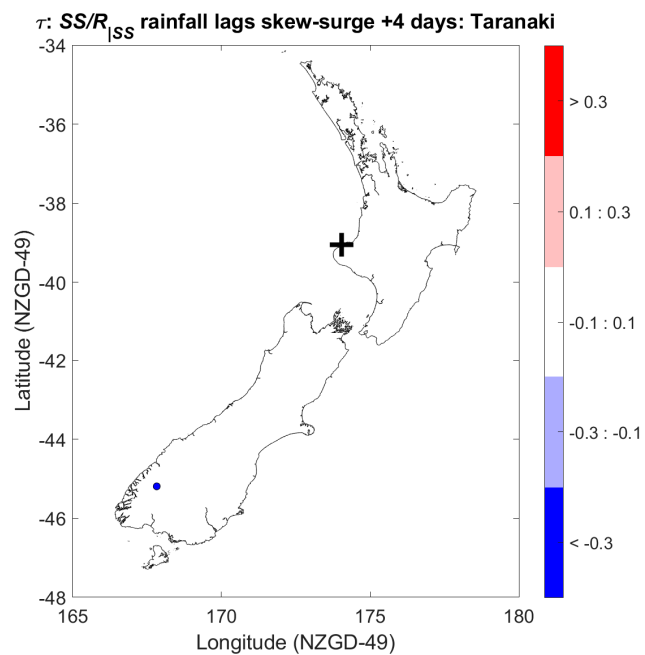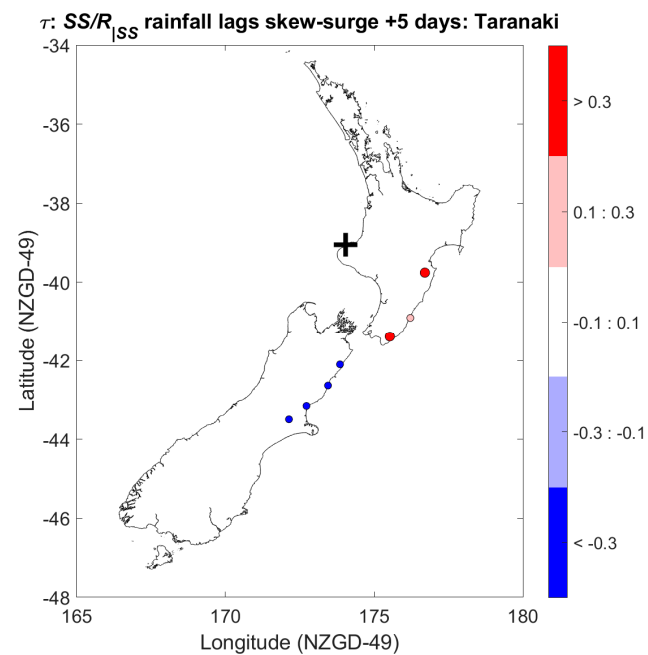

Nelson

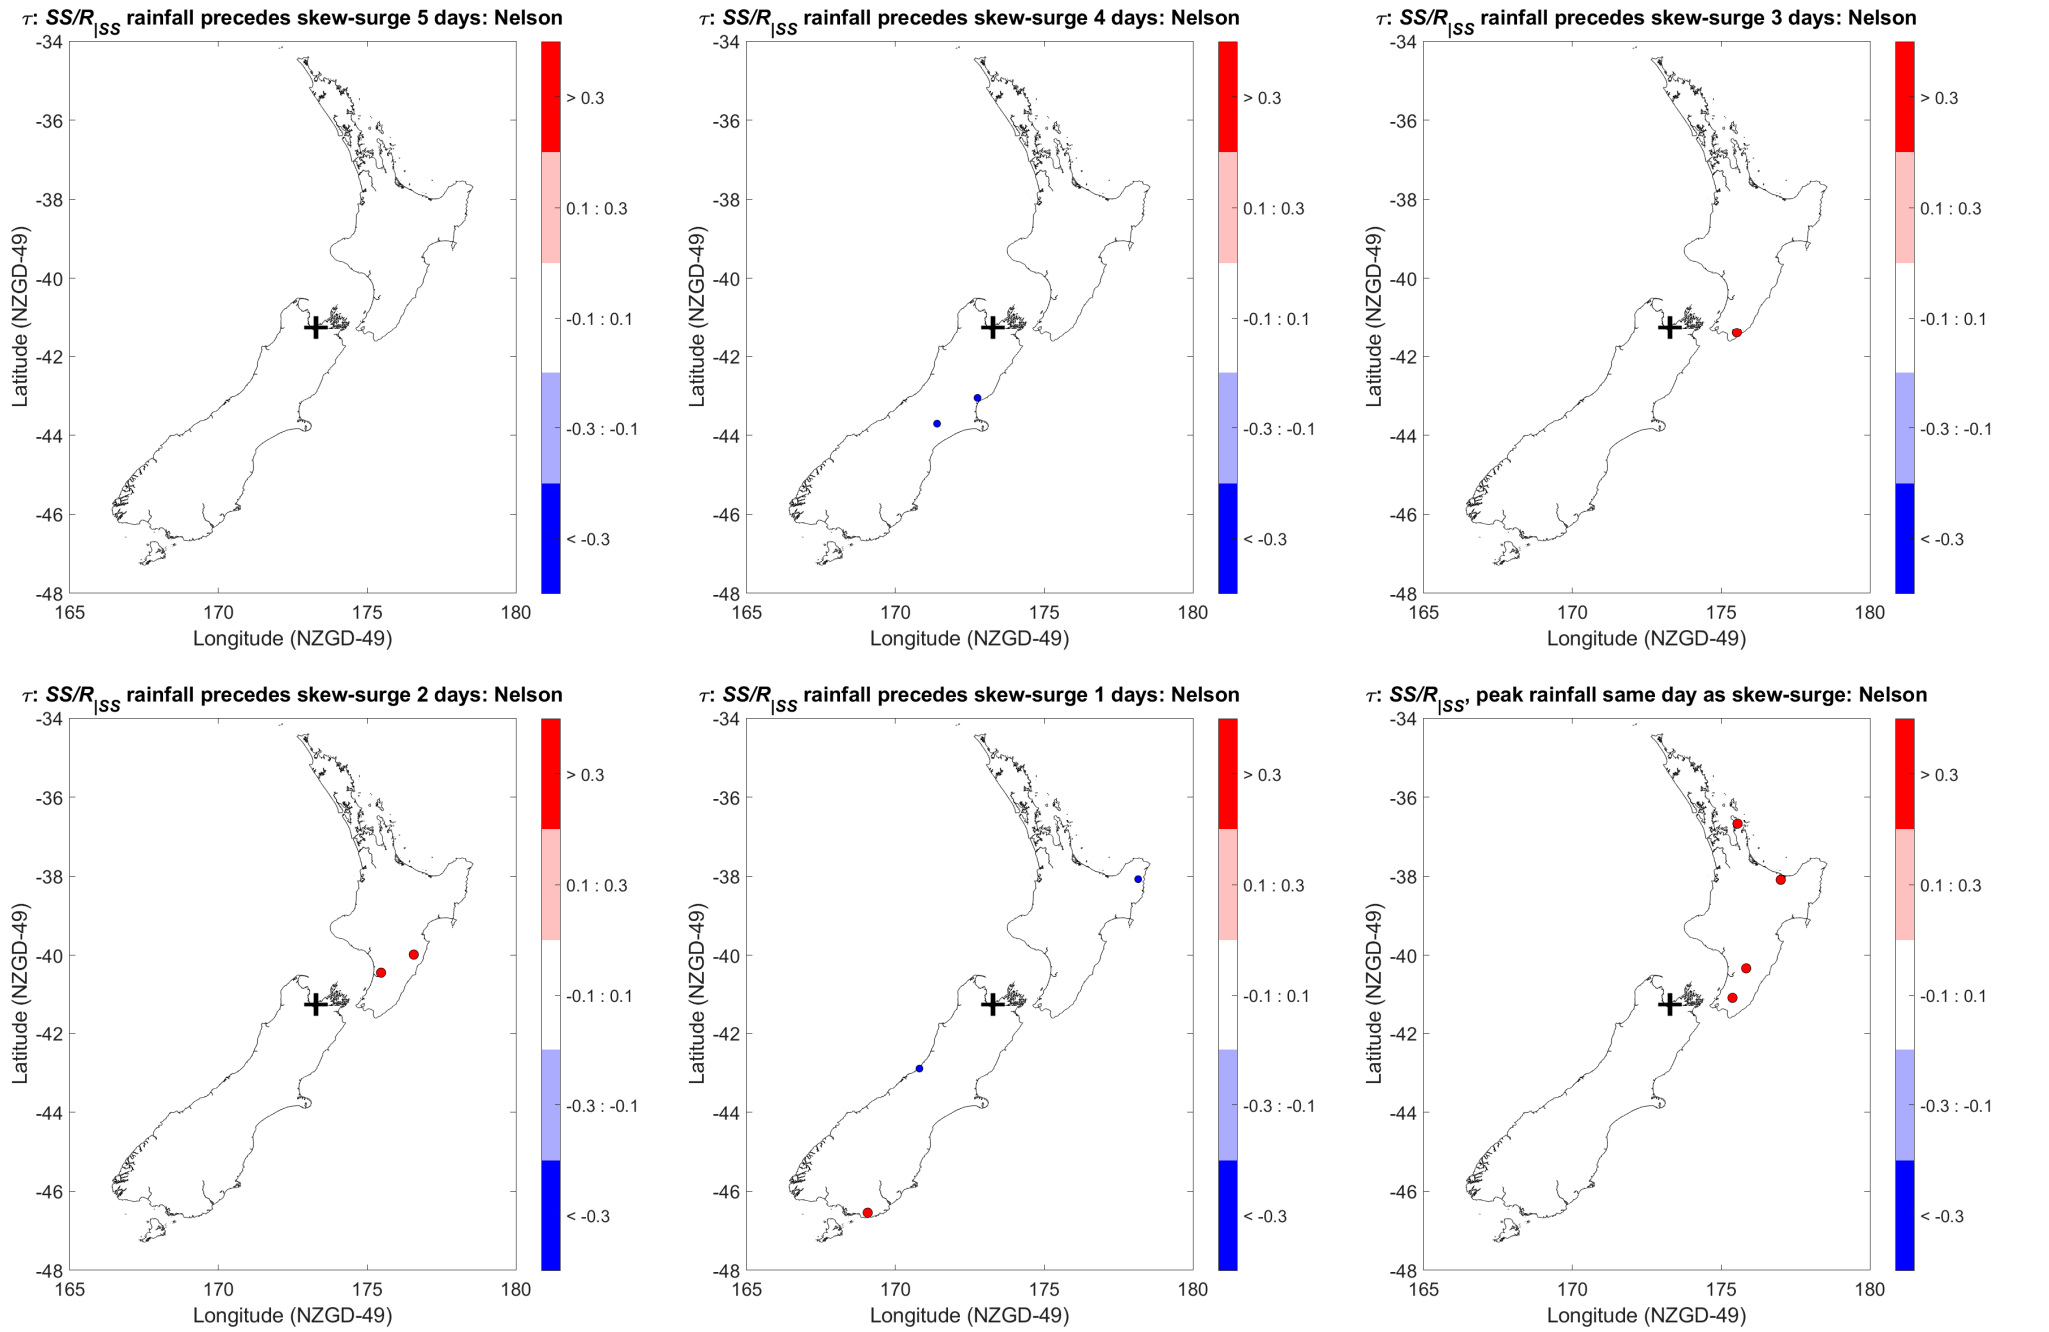

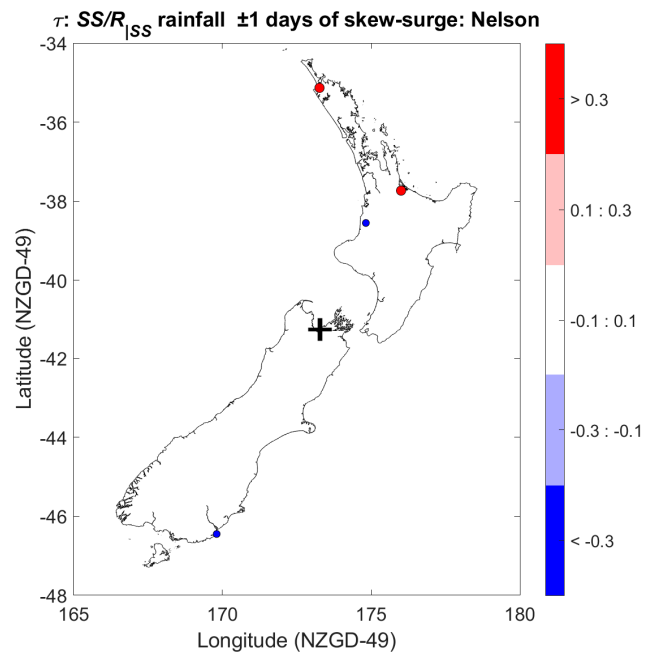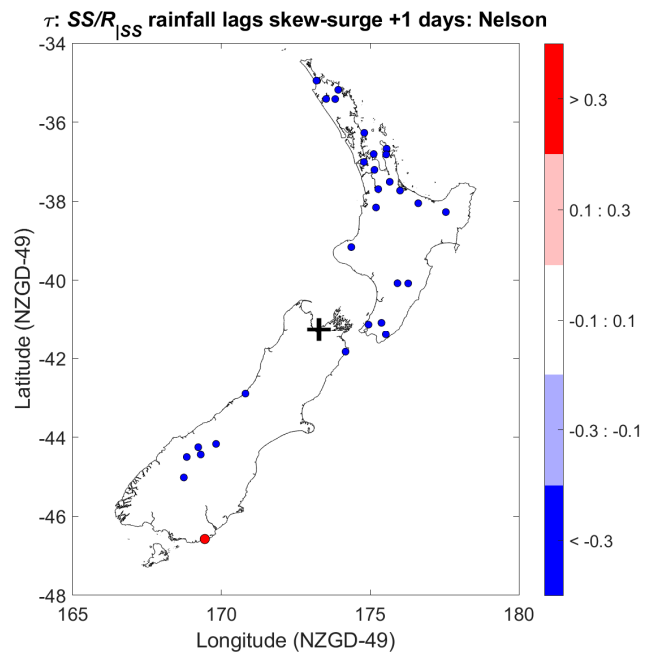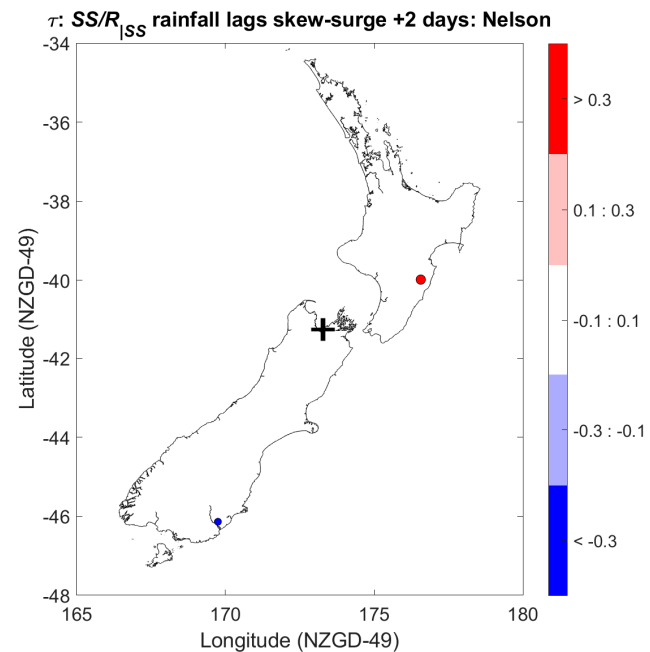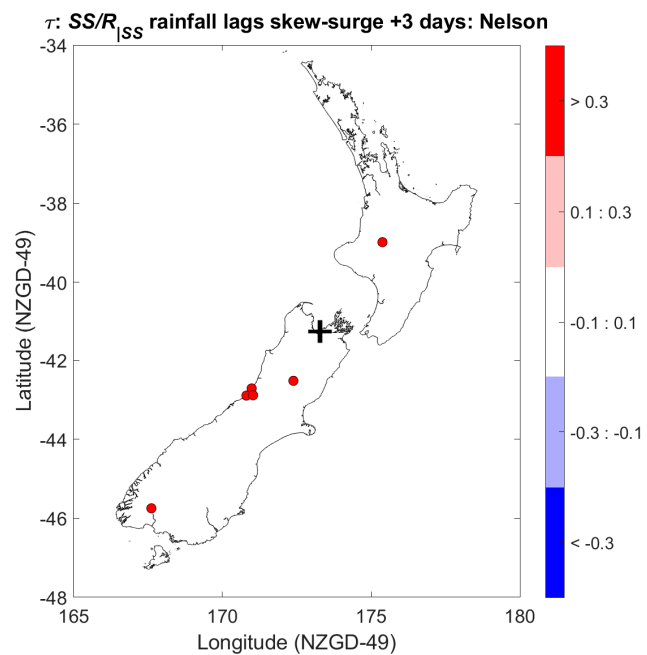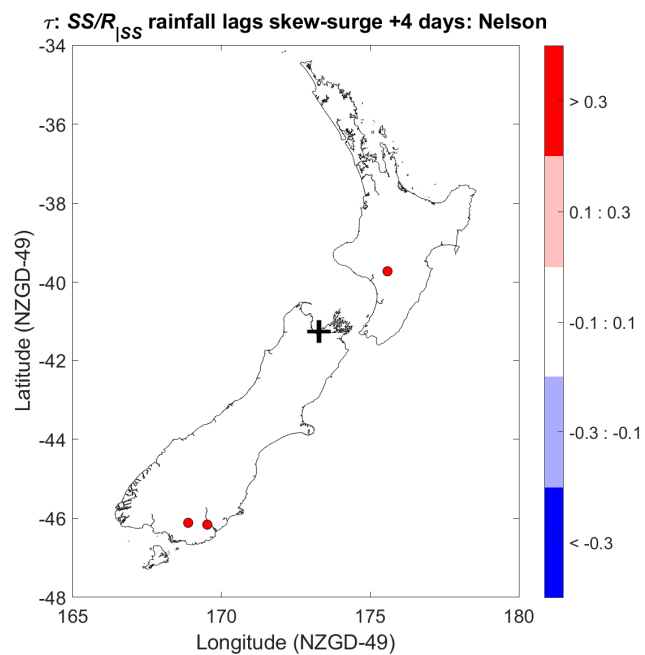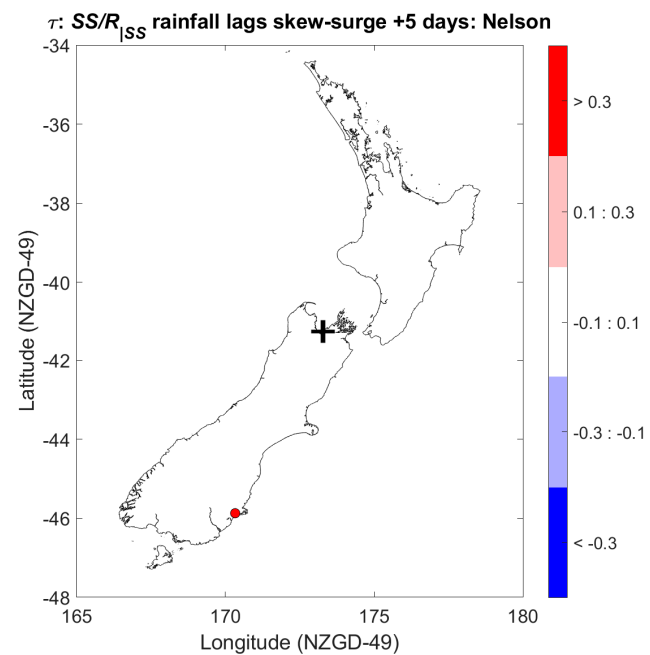

Wellington

$\tau: SS/R_{SS}$  rainfall precedes skew-surge 5 days: Wellington

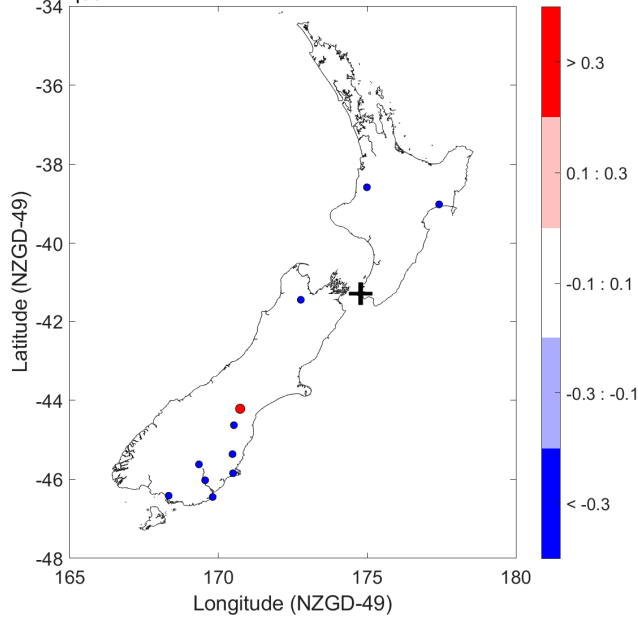

$\tau: SS/R_{SS}$  rainfall precedes skew-surge 4 days: Wellington

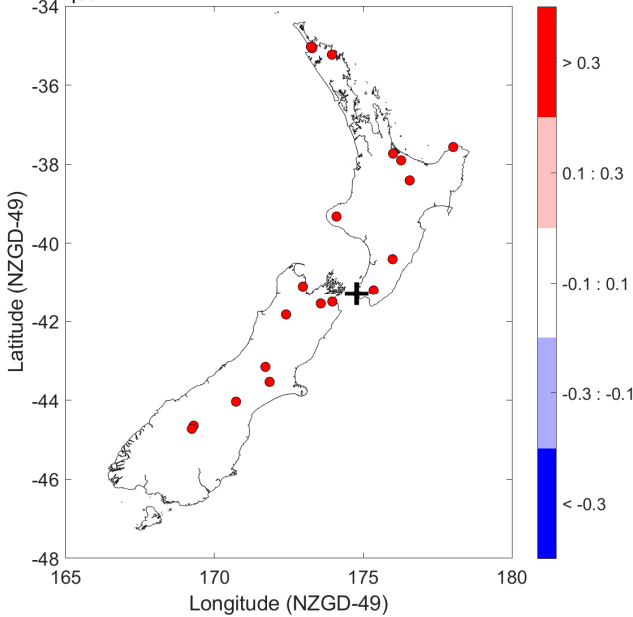

$\tau: SS/R_{SS}$  rainfall precedes skew-surge 3 days: Wellington

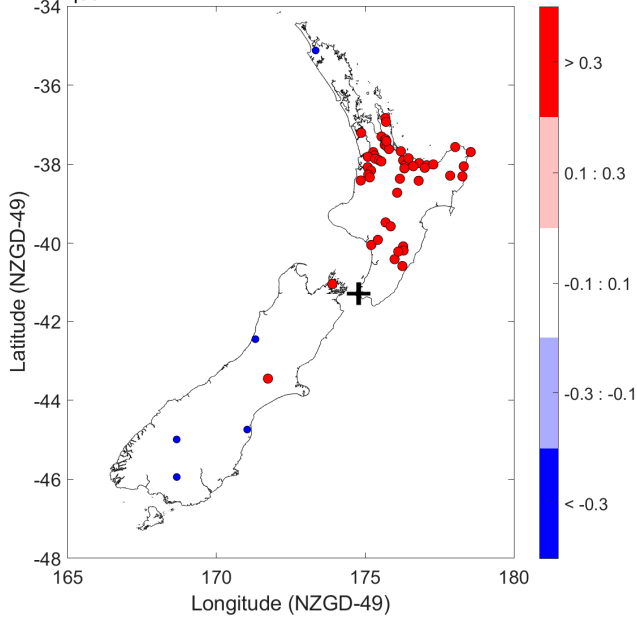

$\tau: SS/R_{SS}$  rainfall precedes skew-surge 2 days: Wellington

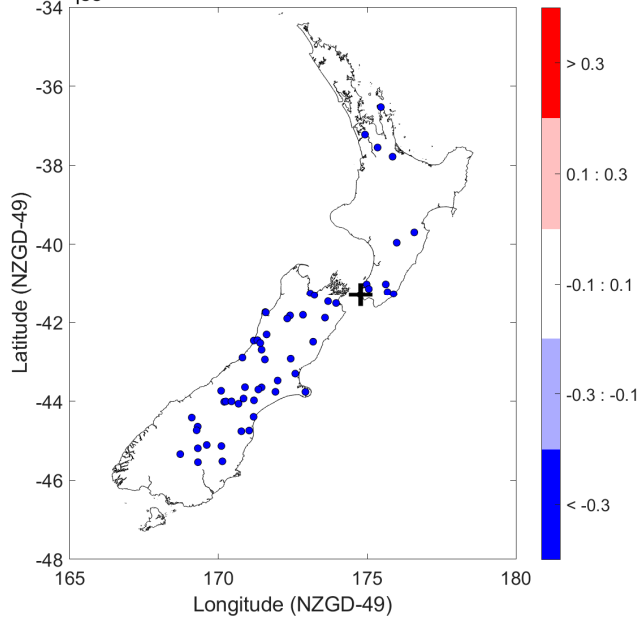

$\tau: SS/R_{SS}$  rainfall precedes skew-surge 1 days: Wellington

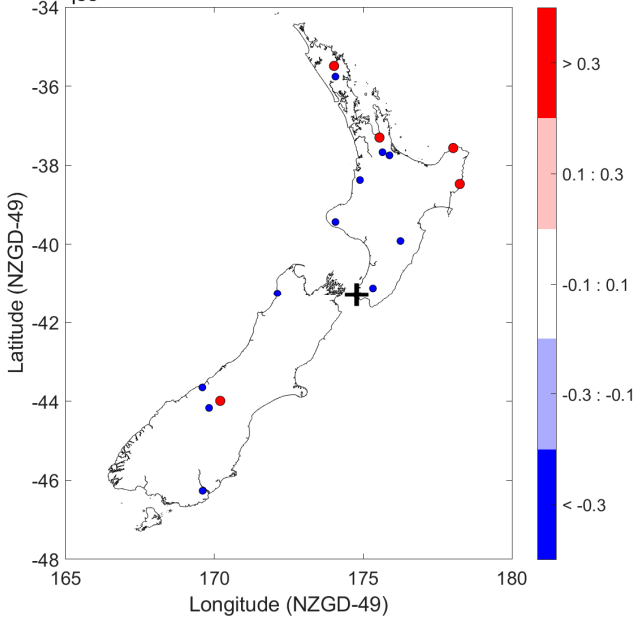

$\tau: SS/R_{SS}$  peak rainfall same day as skew-surge: Wellington

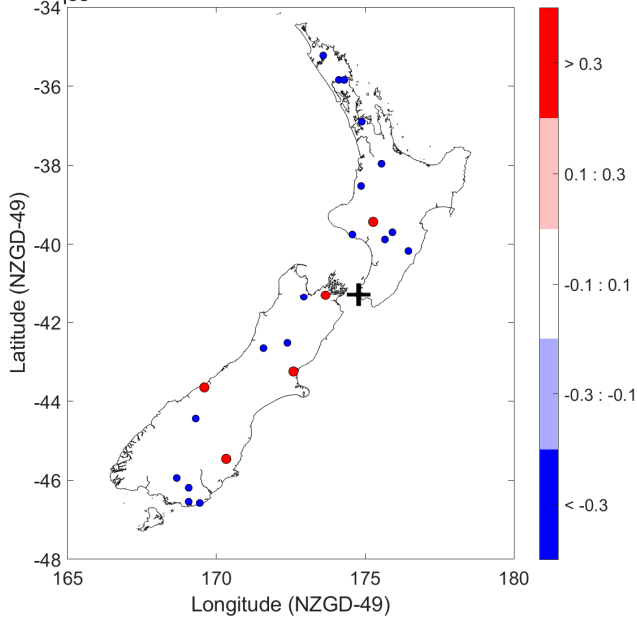

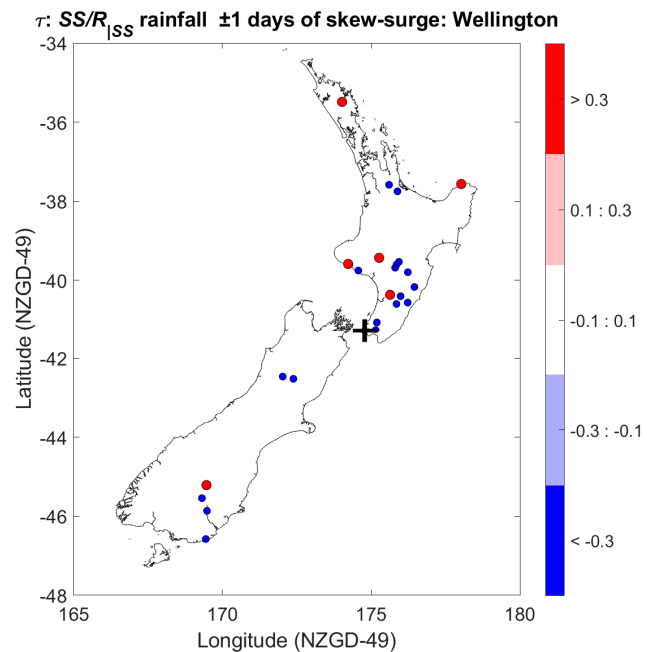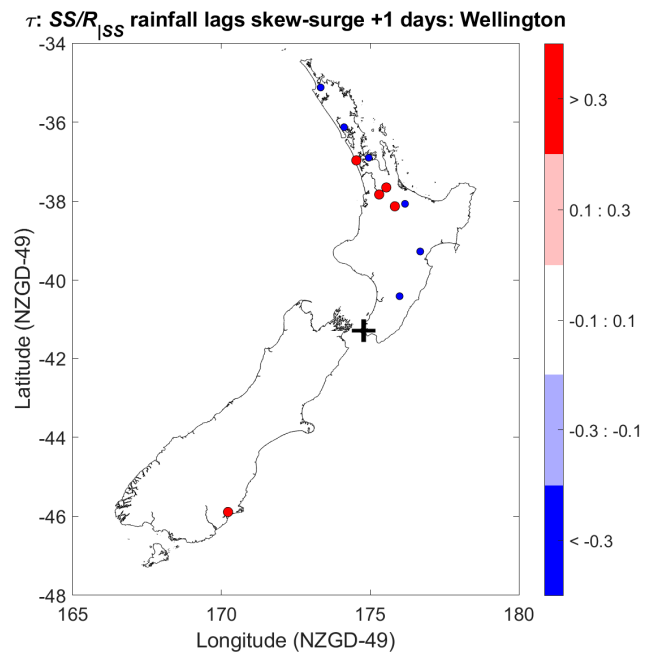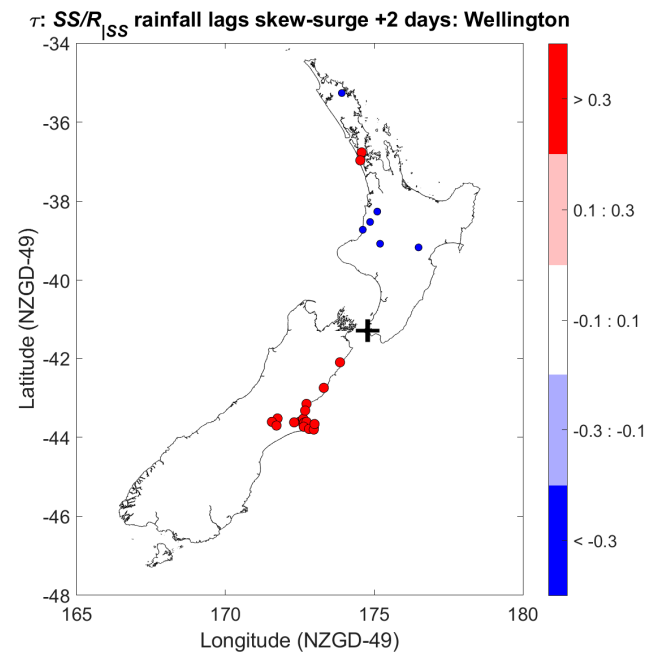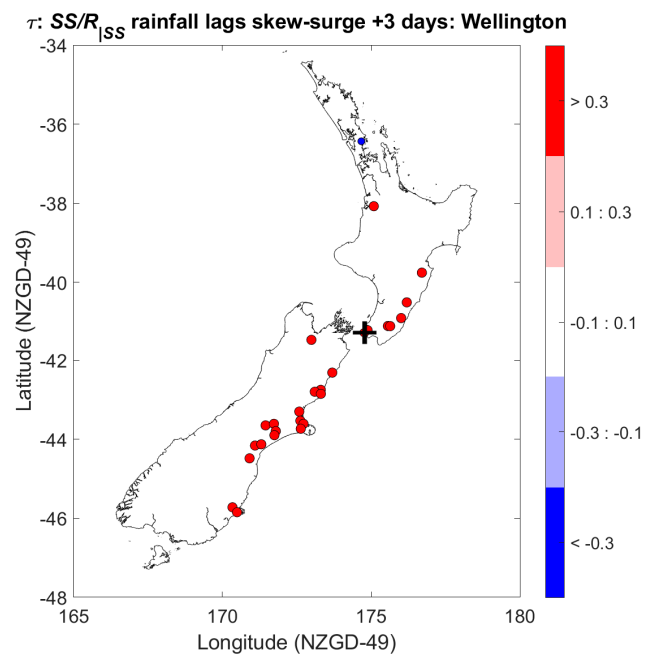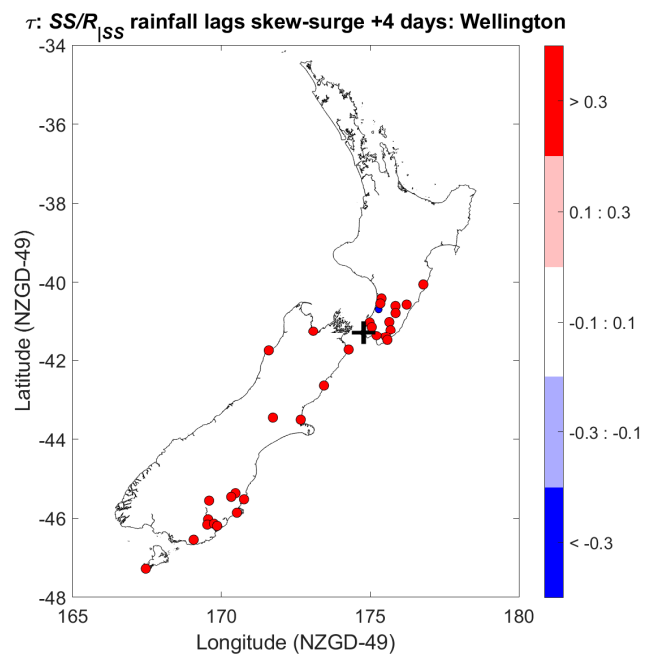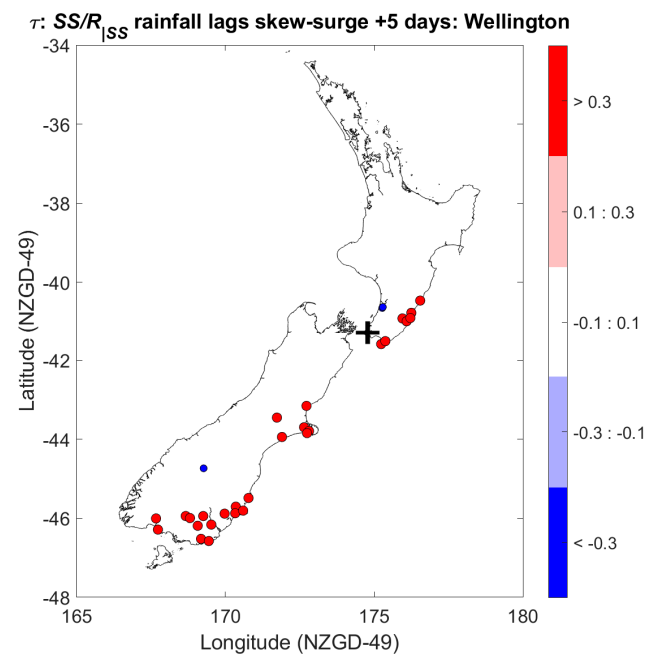

Jackson Bay

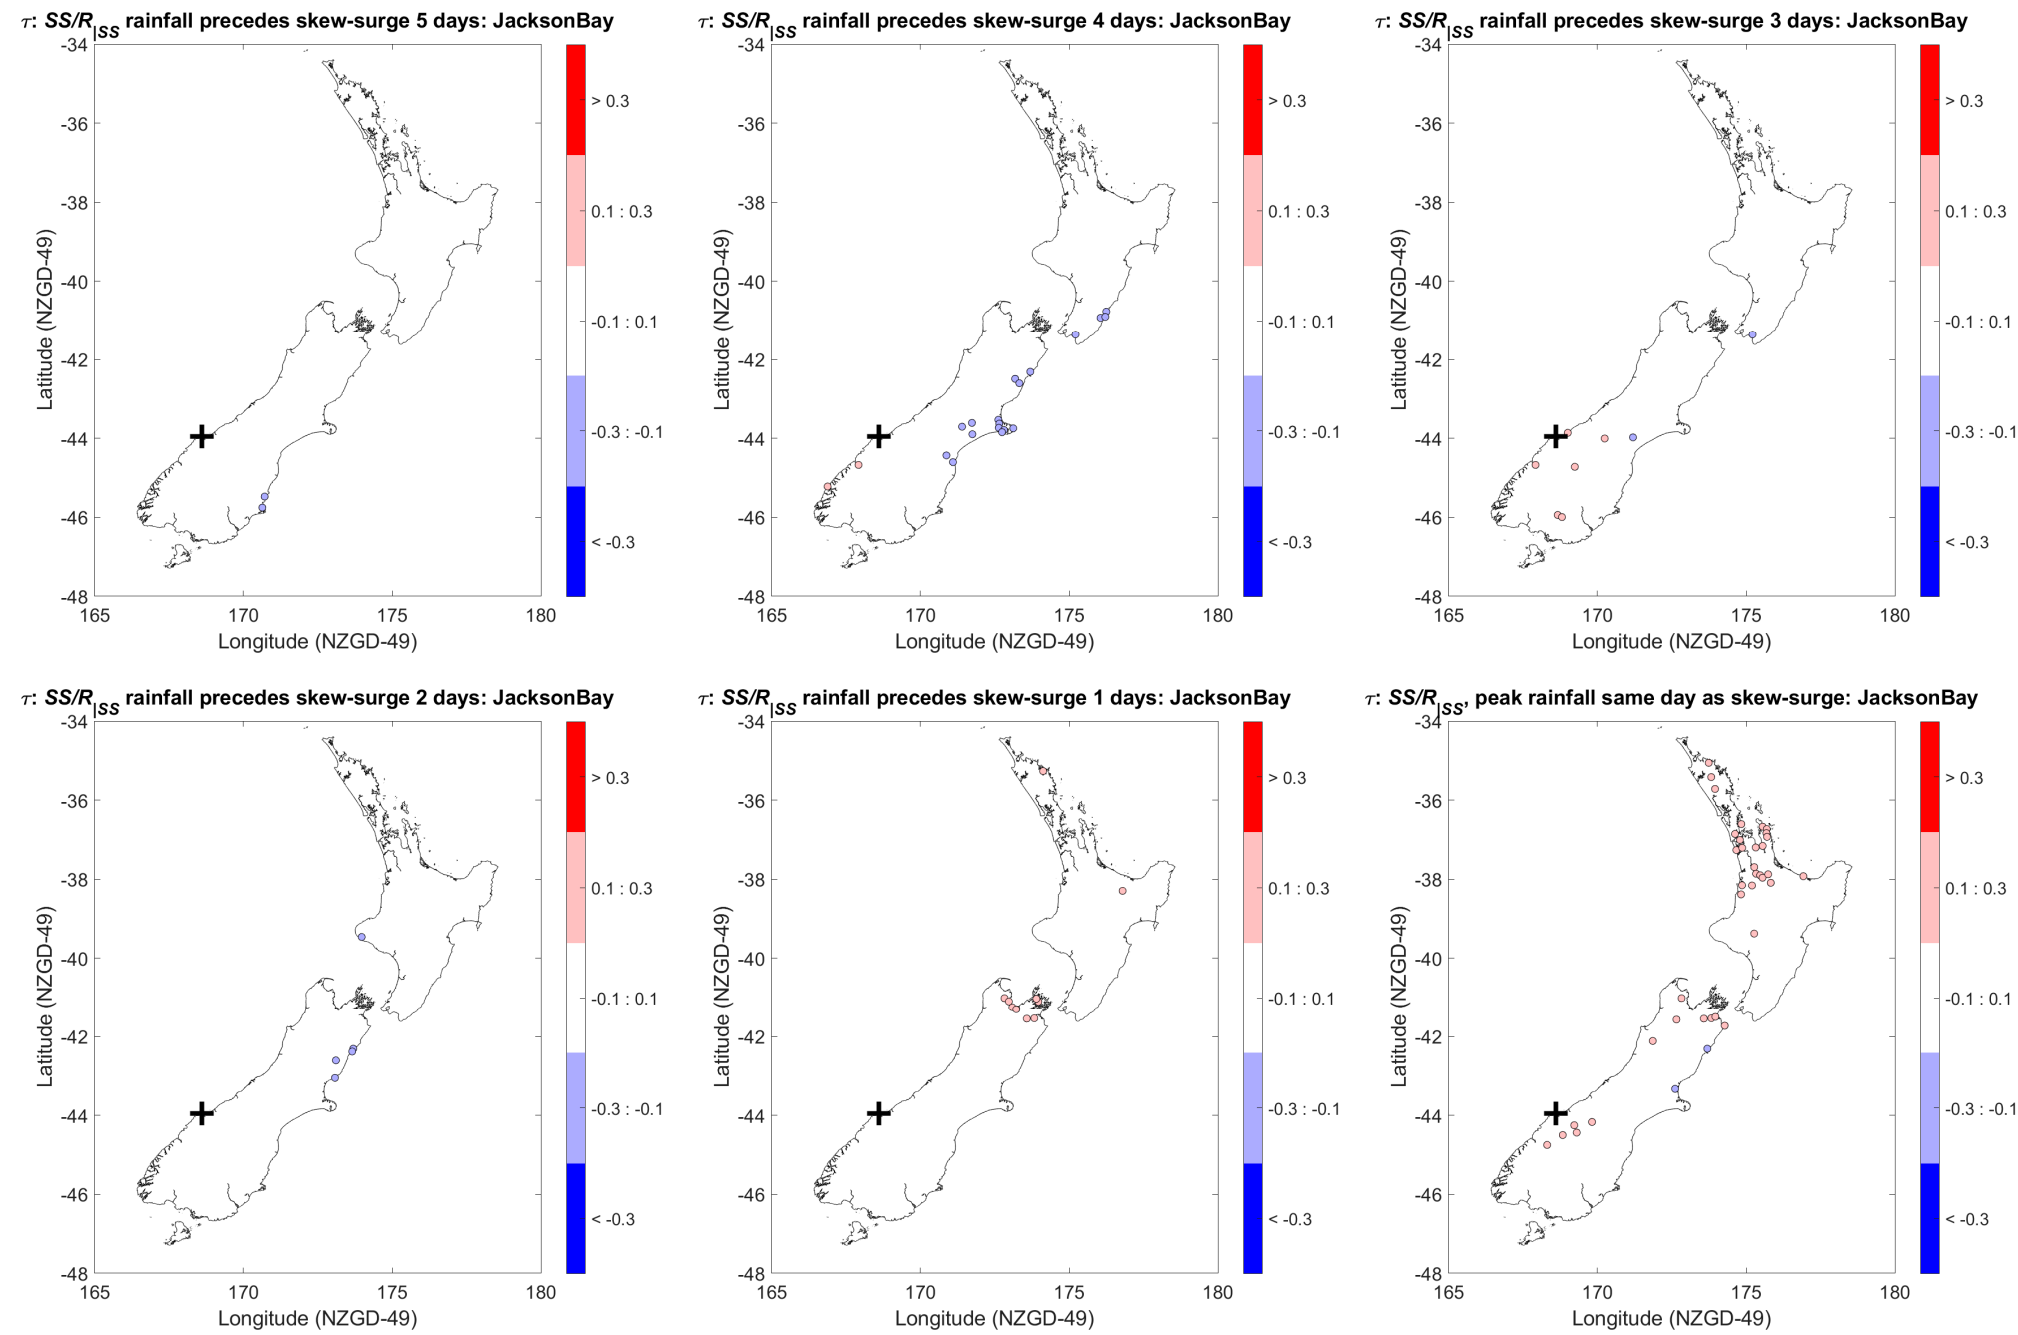

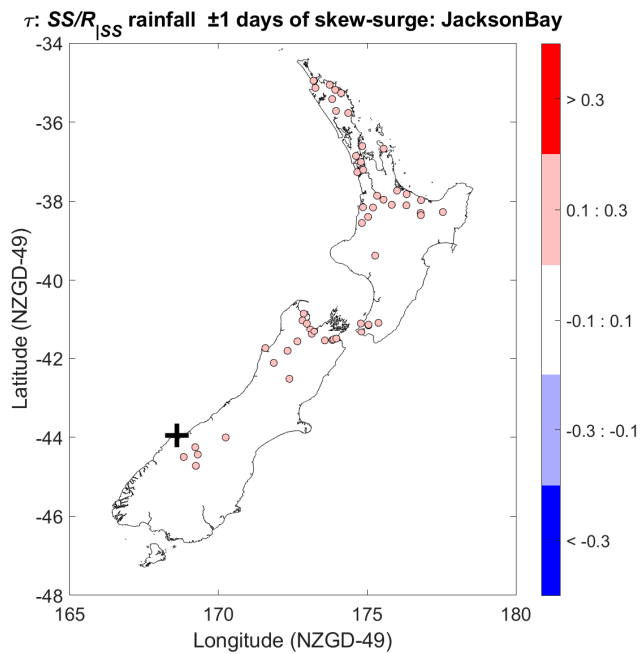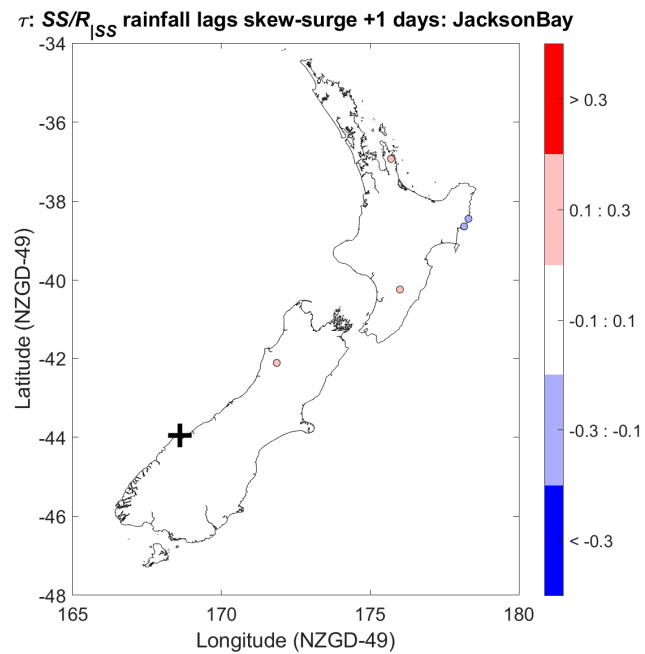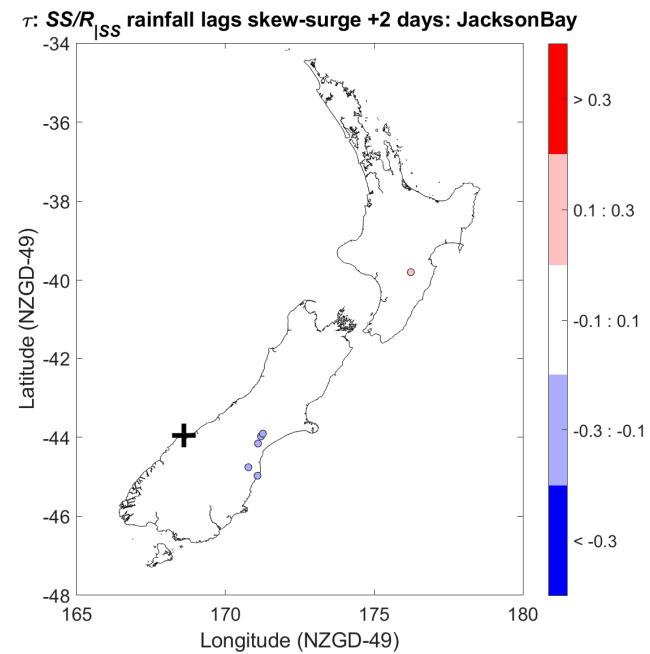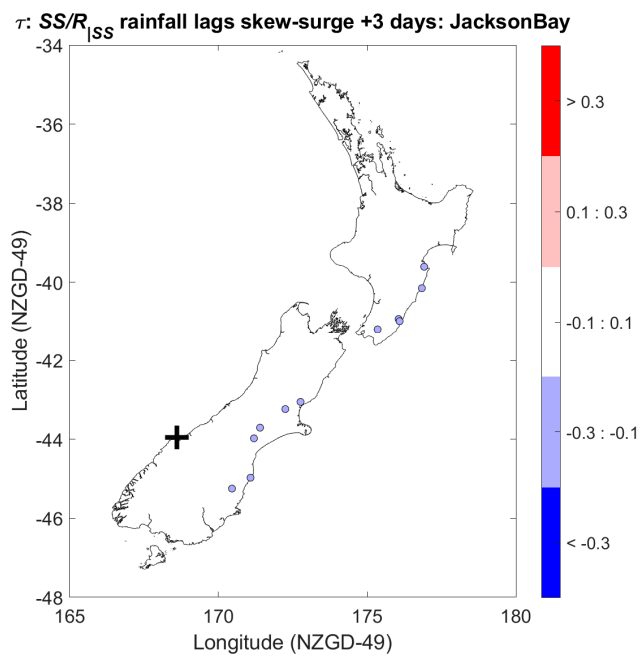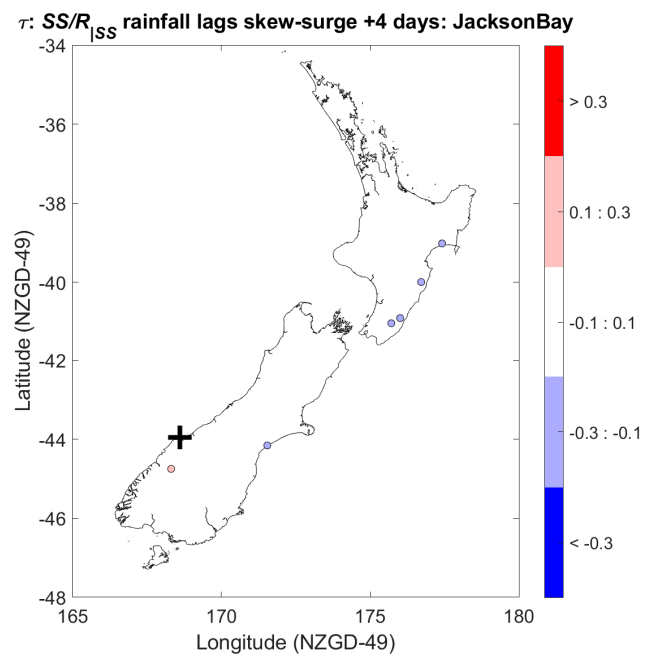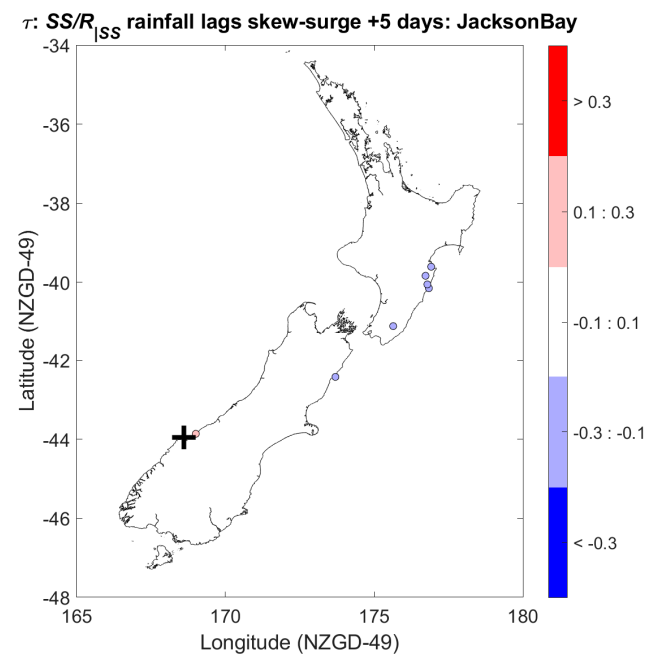

Lyttelton

$\tau$ :  $SS/R_{SS}$  rainfall precedes skew-surge 5 days: Lyttelton

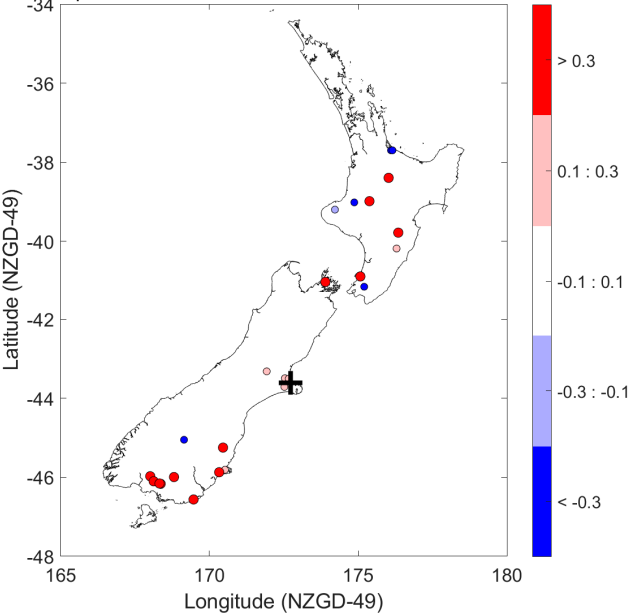

$\tau$ :  $SS/R_{SS}$  rainfall precedes skew-surge 4 days: Lyttelton

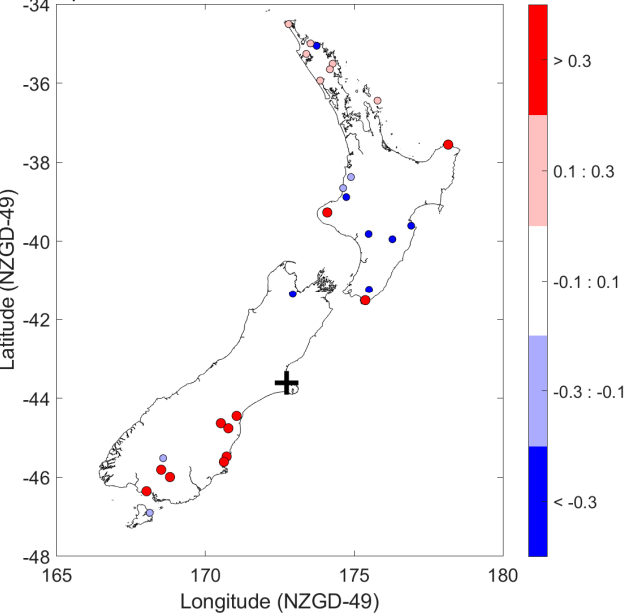

$\tau$ :  $SS/R_{SS}$  rainfall precedes skew-surge 3 days: Lyttelton

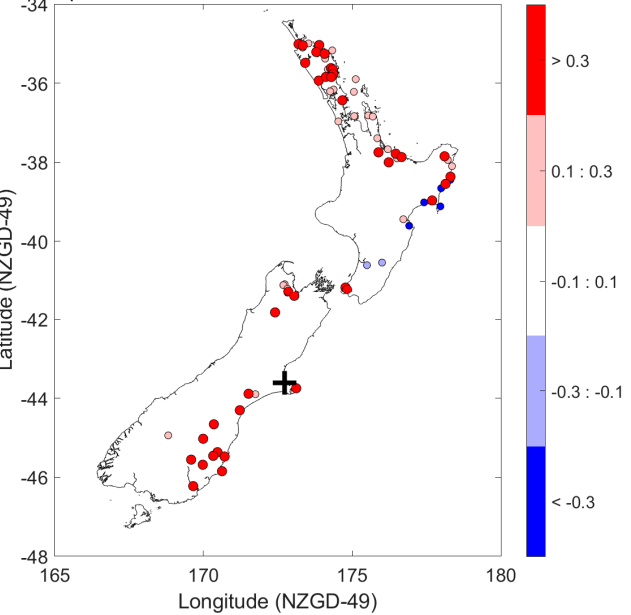

$\tau$ :  $SS/R_{SS}$  rainfall precedes skew-surge 2 days: Lyttelton

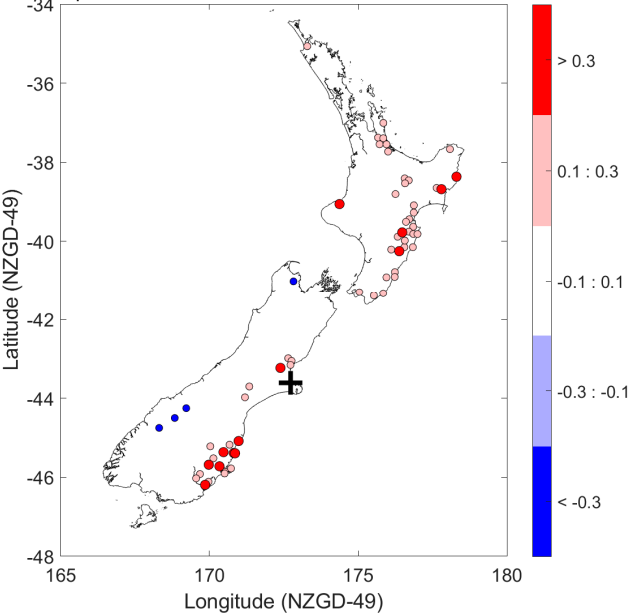

$\tau$ :  $SS/R_{SS}$  rainfall precedes skew-surge 1 days: Lyttelton

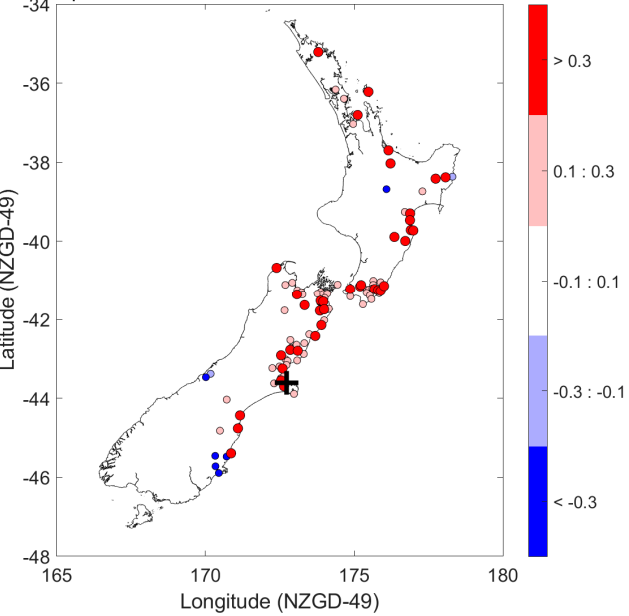

$\tau$ :  $SS/R_{SS}$  peak rainfall same day as skew-surge: Lyttelton

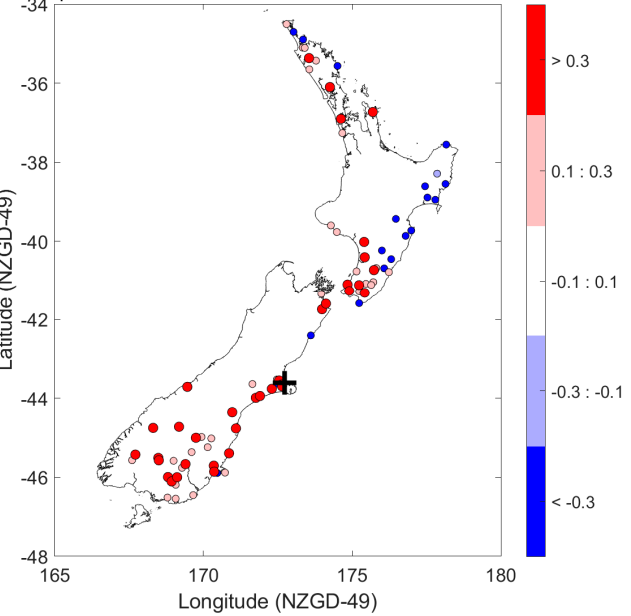



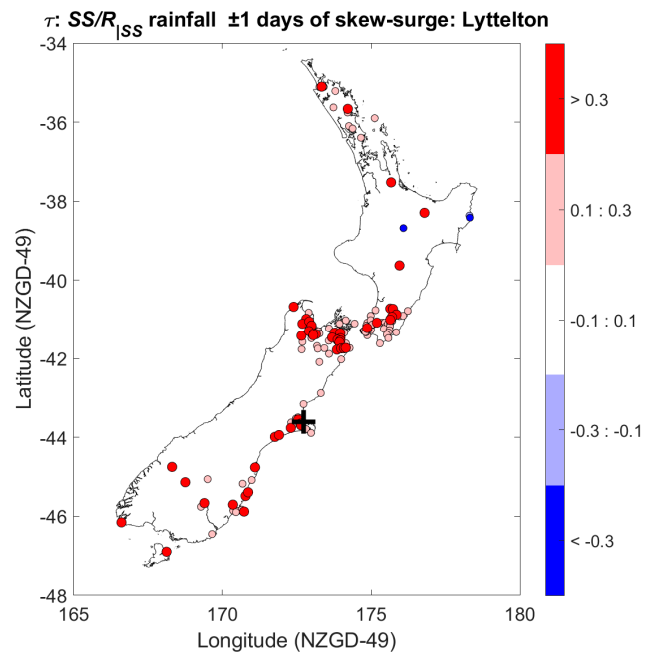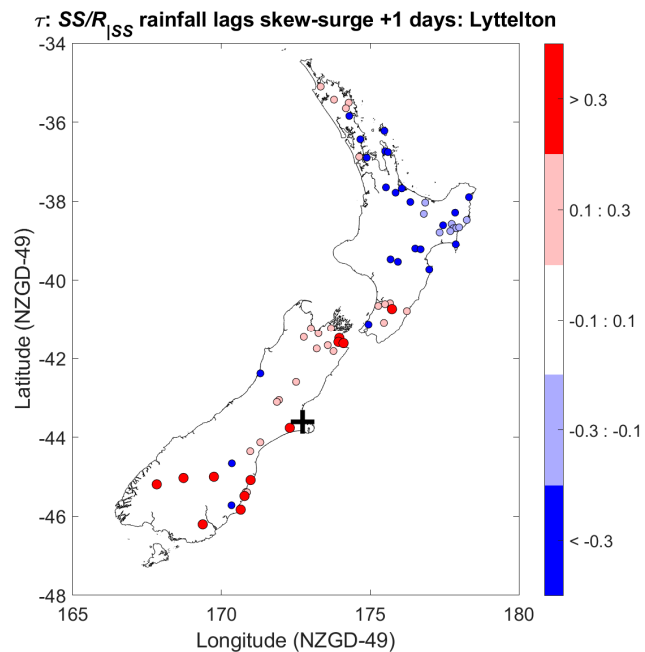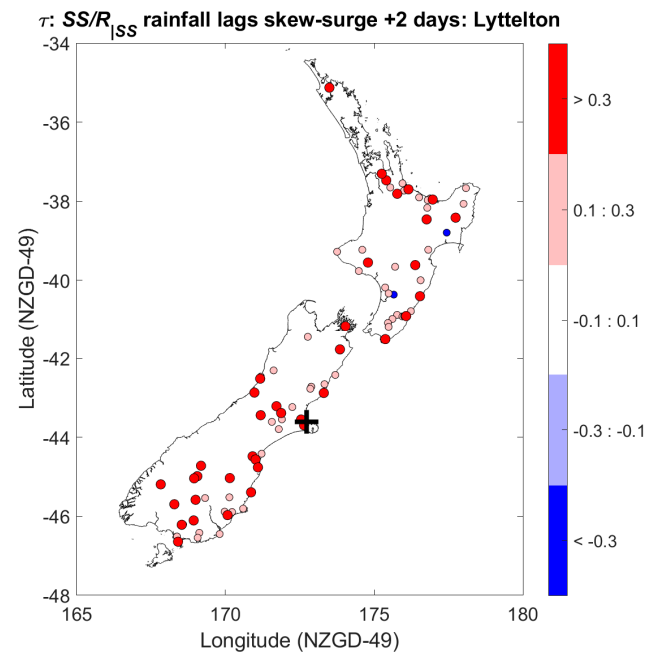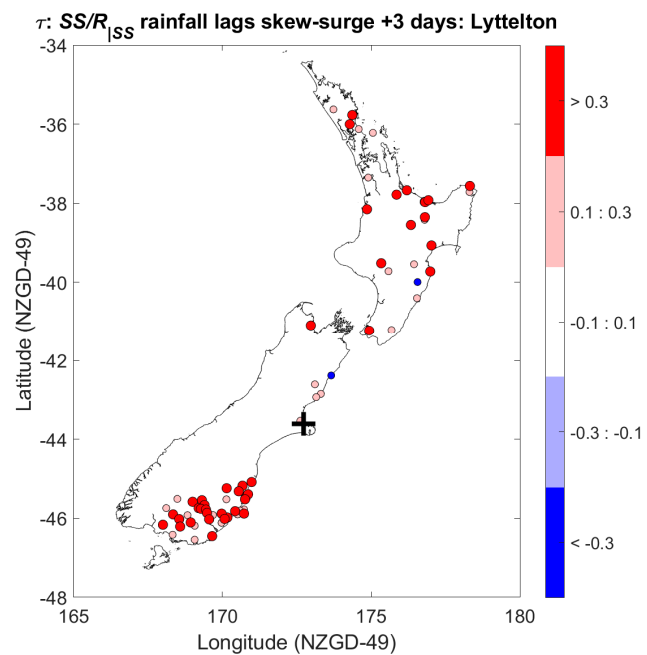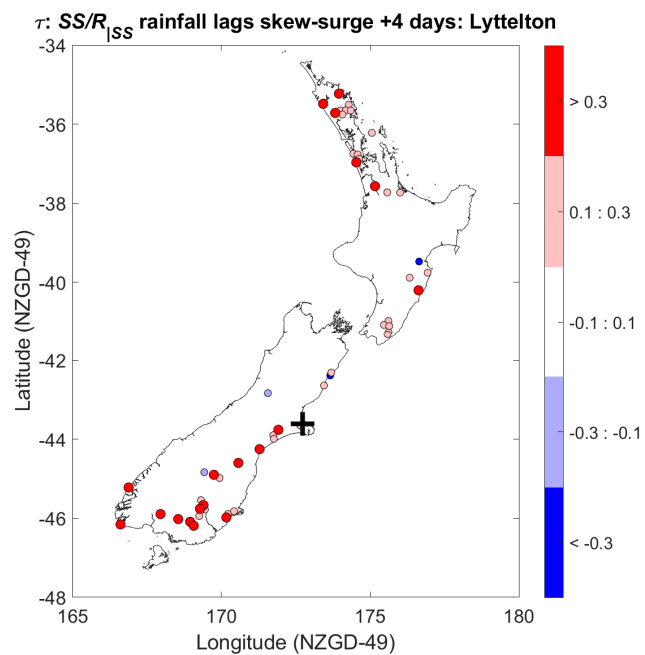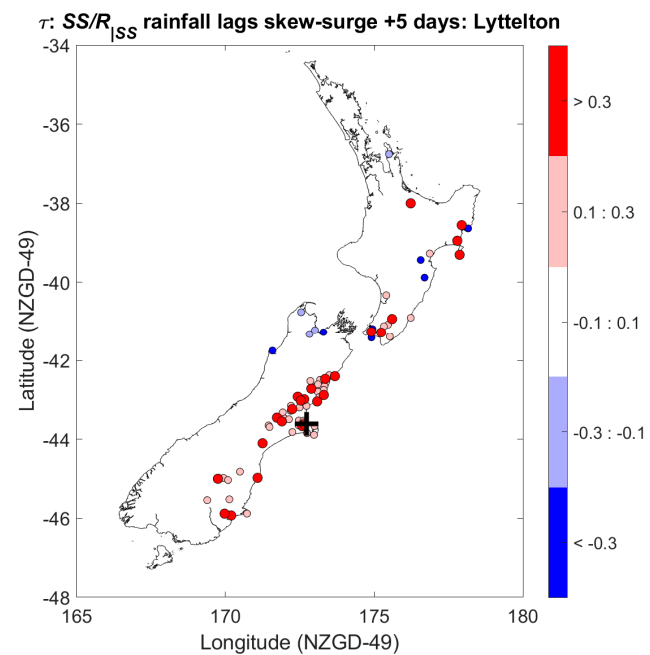

Dunedin

$\tau$ :  $SS/R_{ISS}$  rainfall precedes skew-surge 5 days: Dunedin

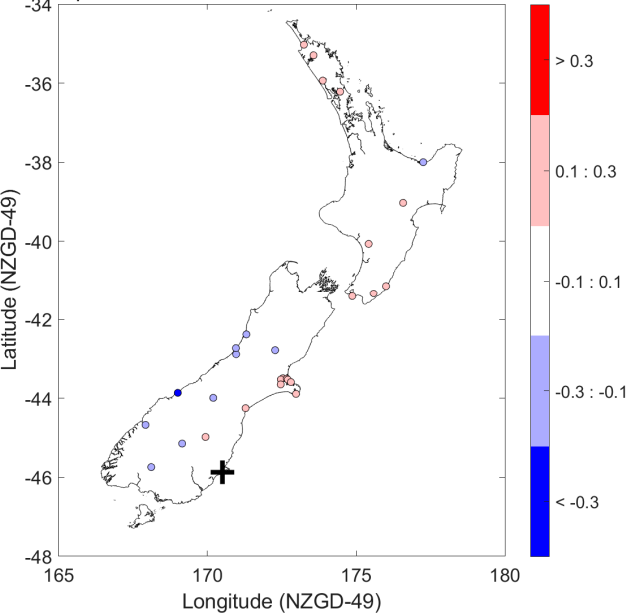

$\tau$ :  $SS/R_{ISS}$  rainfall precedes skew-surge 4 days: Dunedin

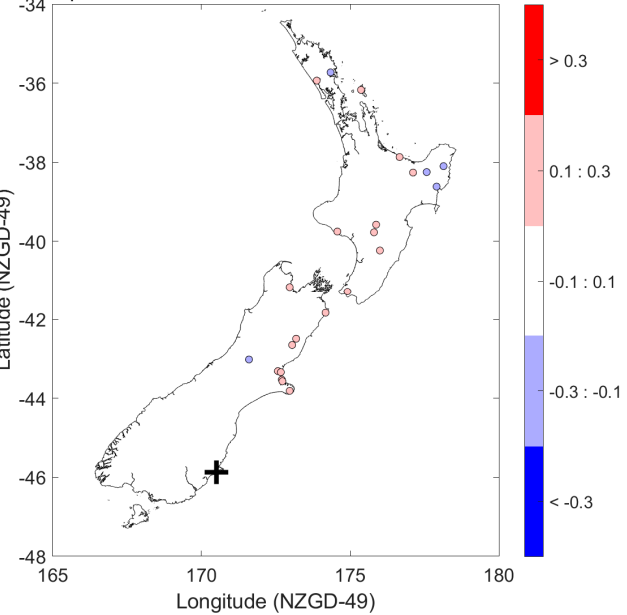

$\tau$ :  $SS/R_{ISS}$  rainfall precedes skew-surge 3 days: Dunedin

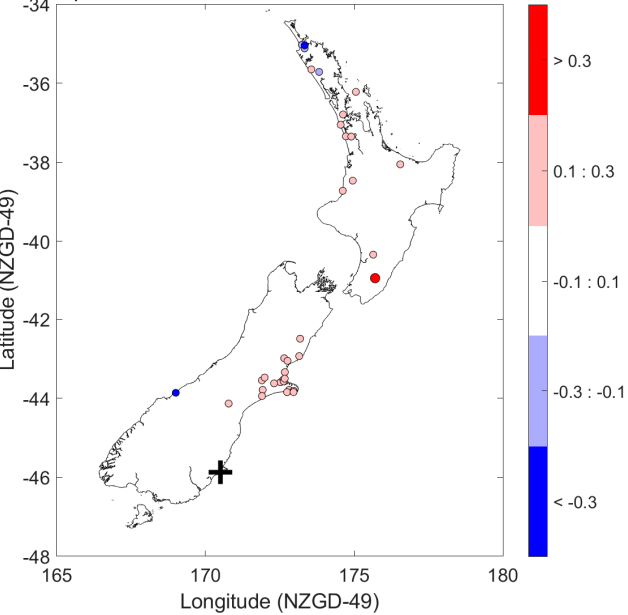

$\tau$ :  $SS/R_{ISS}$  rainfall precedes skew-surge 2 days: Dunedin

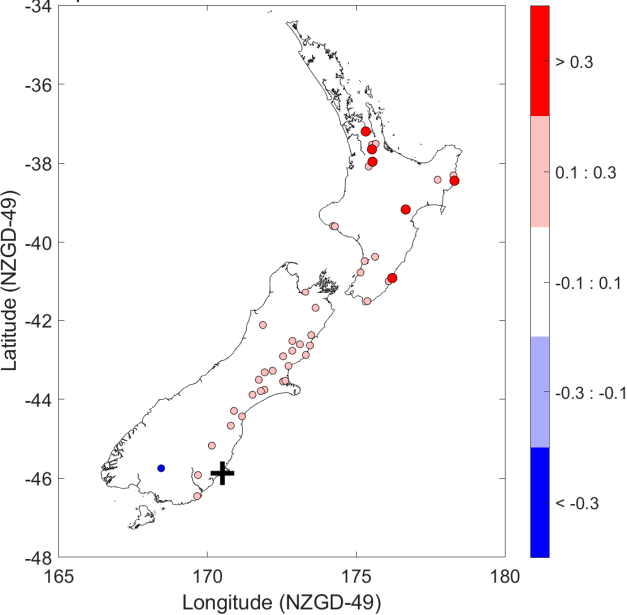

$\tau$ :  $SS/R_{ISS}$  rainfall precedes skew-surge 1 days: Dunedin

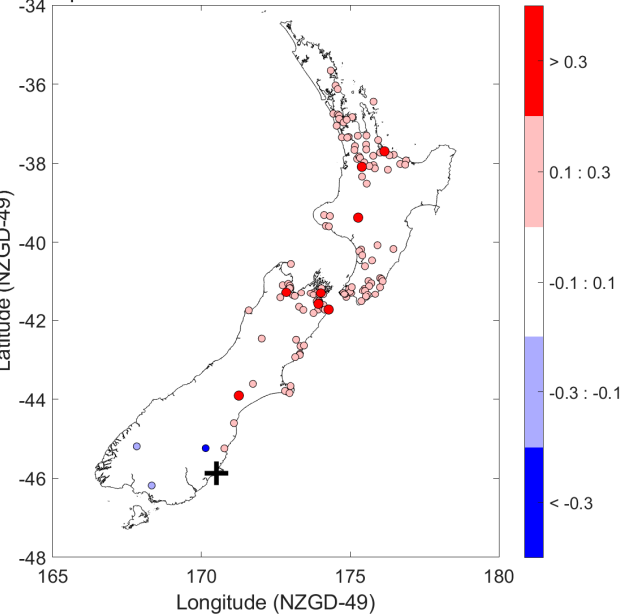

$\tau$ :  $SS/R_{ISS}$ , peak rainfall same day as skew-surge: Dunedin

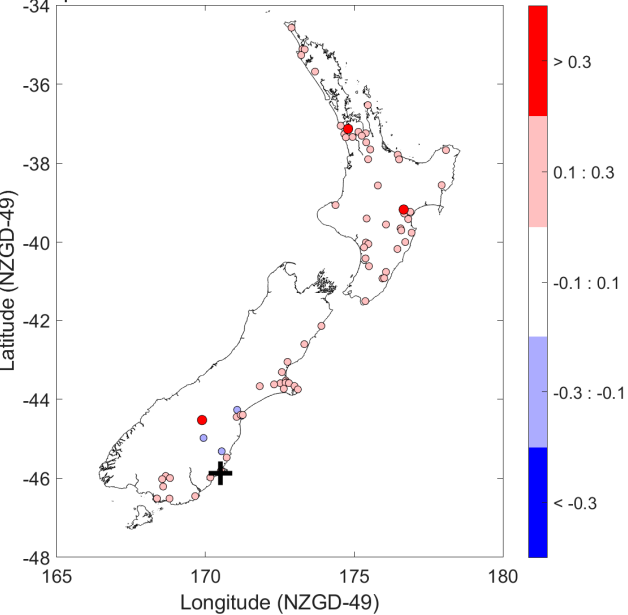

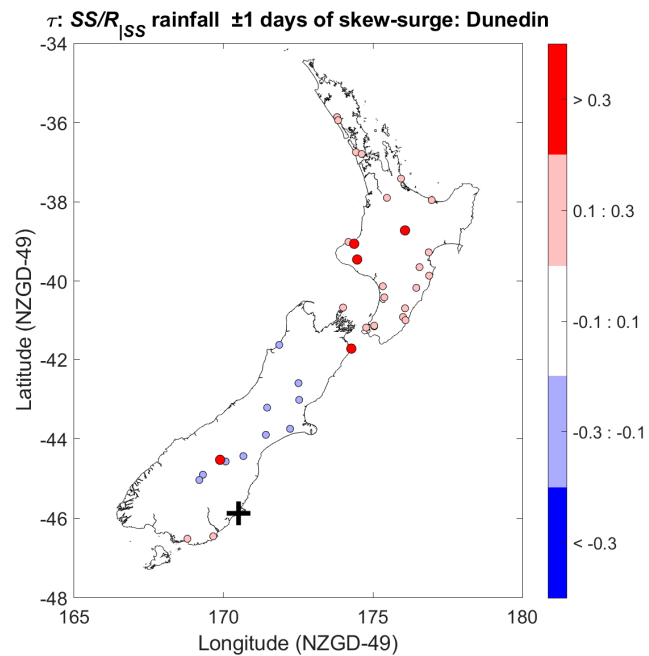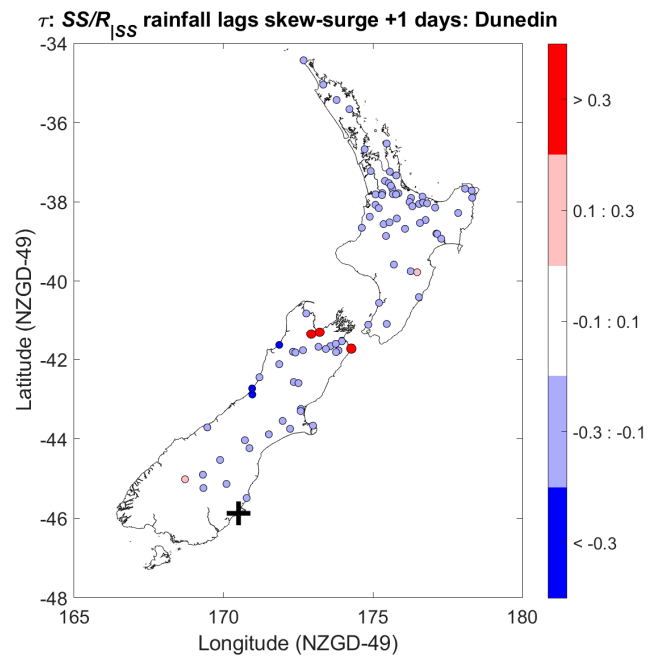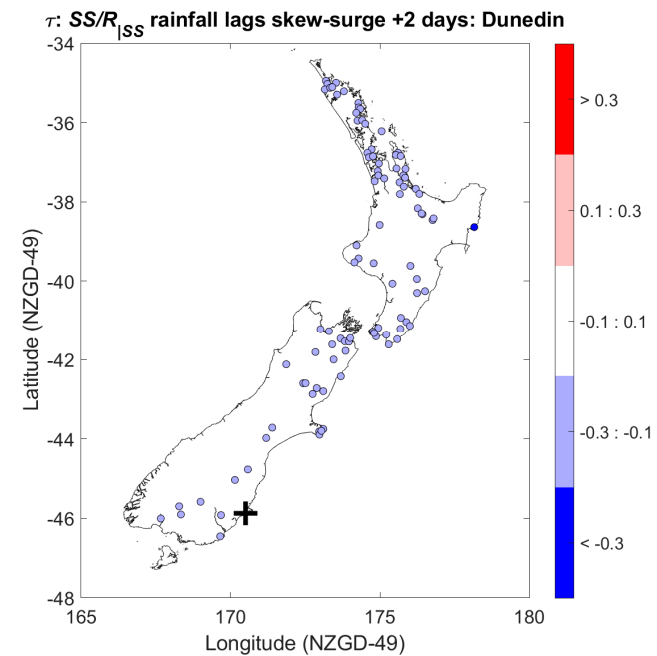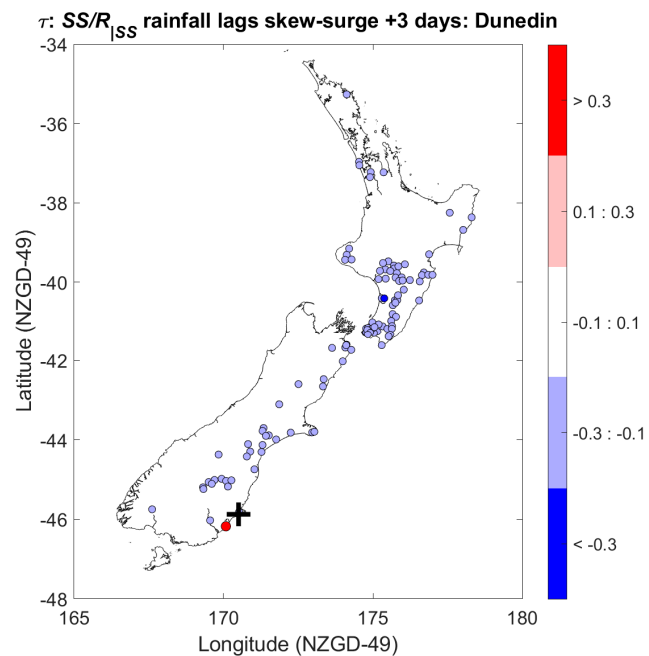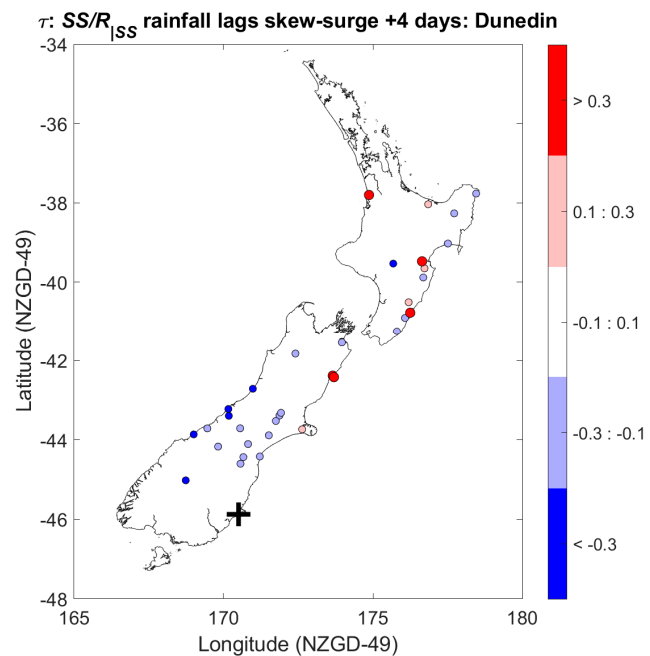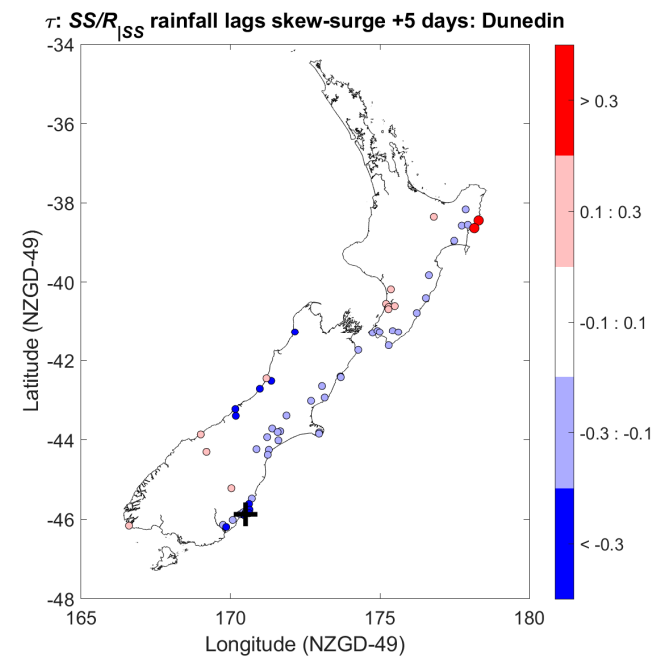

Dog Island

$\tau$ :  $SS/R_{|SS}$  rainfall precedes skew-surge 5 days: DogIsland

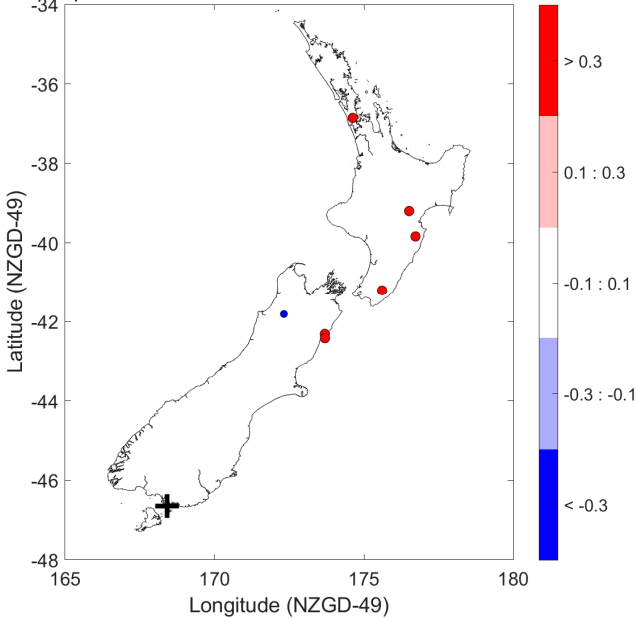

$\tau$ :  $SS/R_{|SS}$  rainfall precedes skew-surge 4 days: DogIsland

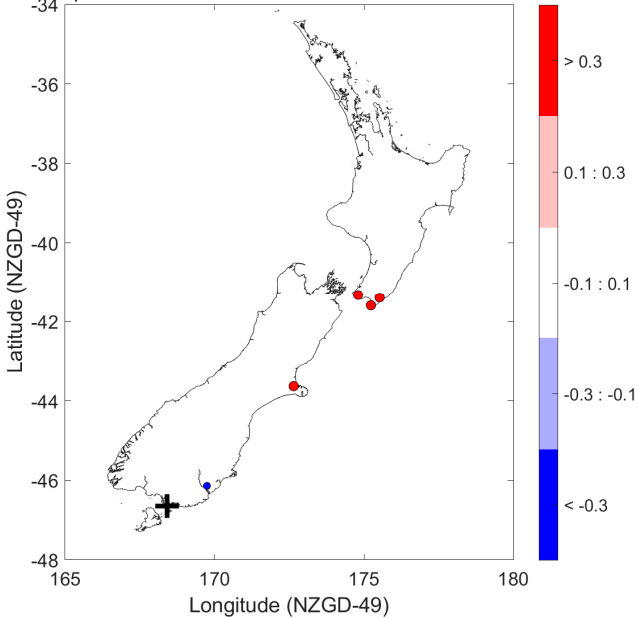

$\tau$ :  $SS/R_{|SS}$  rainfall precedes skew-surge 3 days: DogIsland

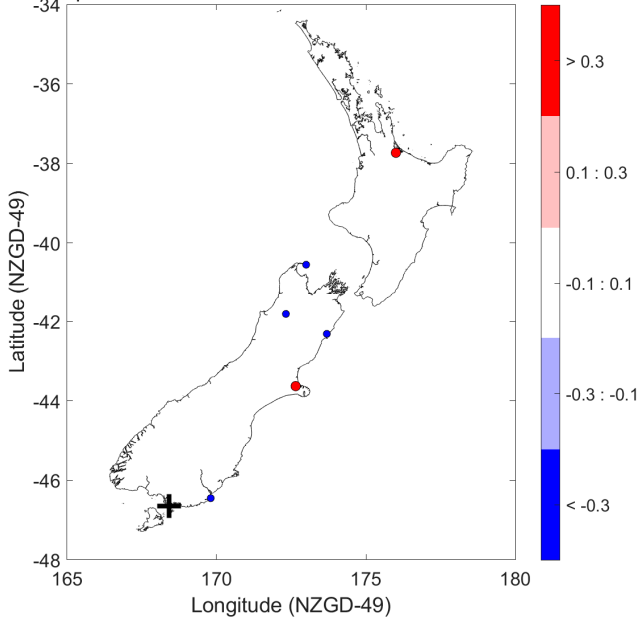

$\tau$ :  $SS/R_{|SS}$  rainfall precedes skew-surge 2 days: DogIsland

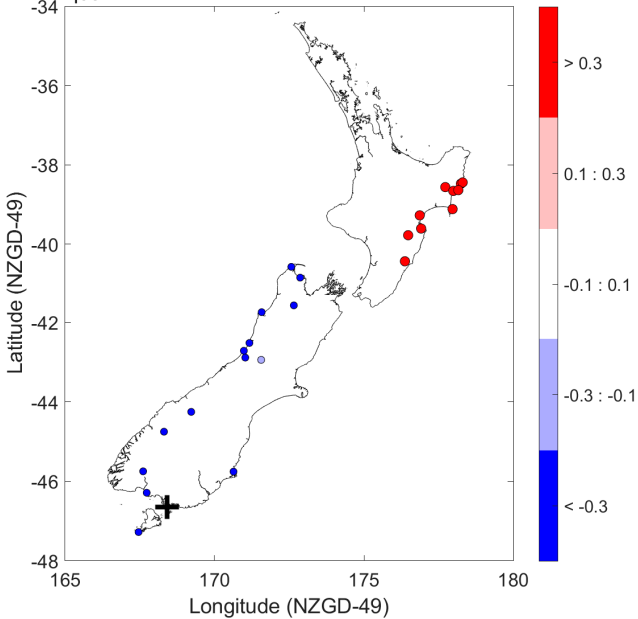

$\tau$ :  $SS/R_{|SS}$  rainfall precedes skew-surge 1 days: DogIsland

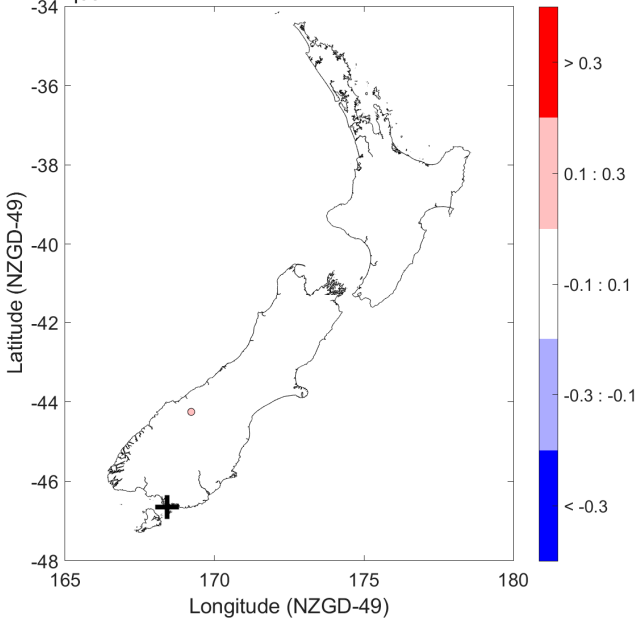

$\tau$ :  $SS/R_{|SS}$  peak rainfall same day as skew-surge: DogIsland

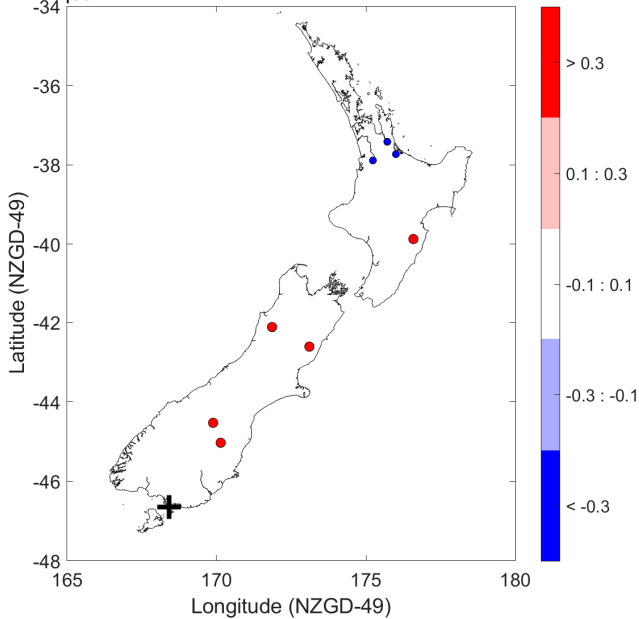

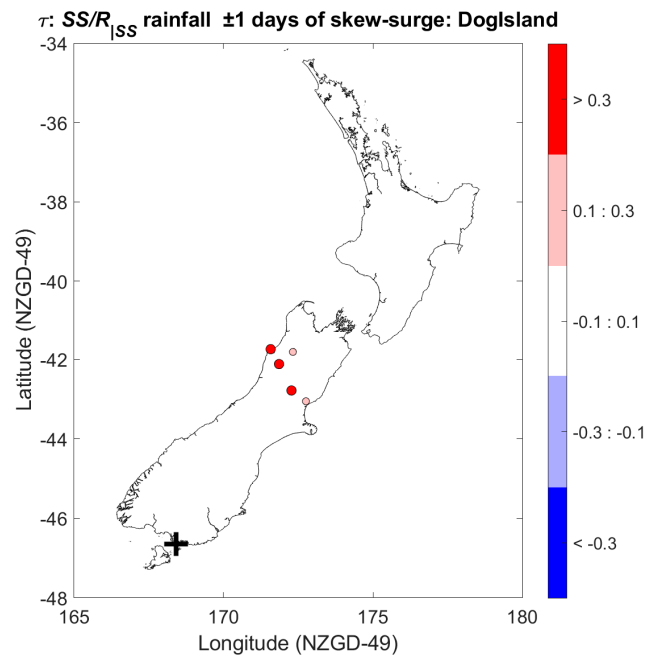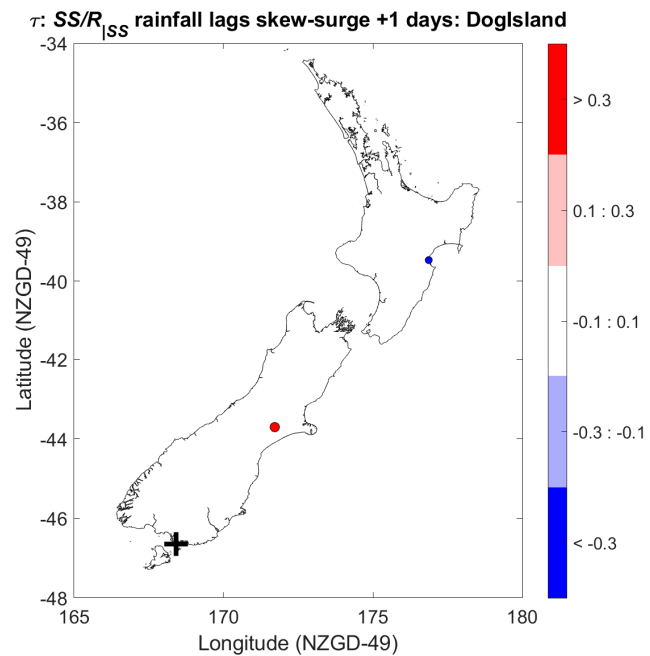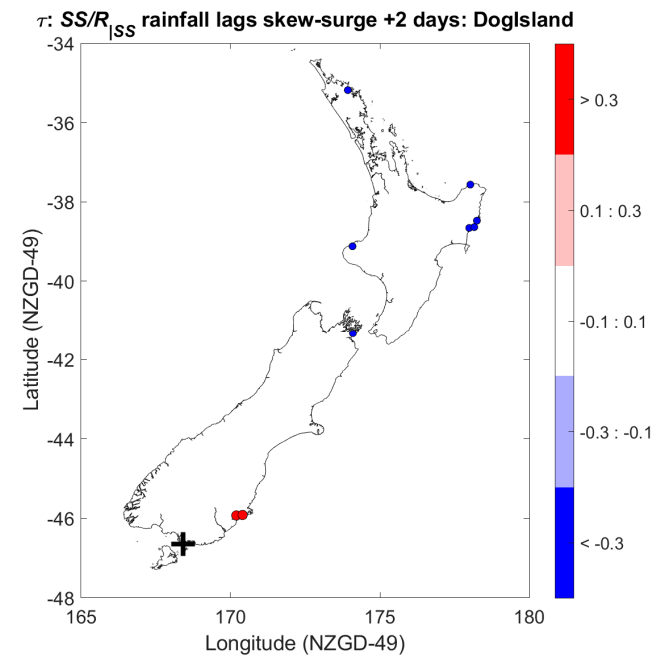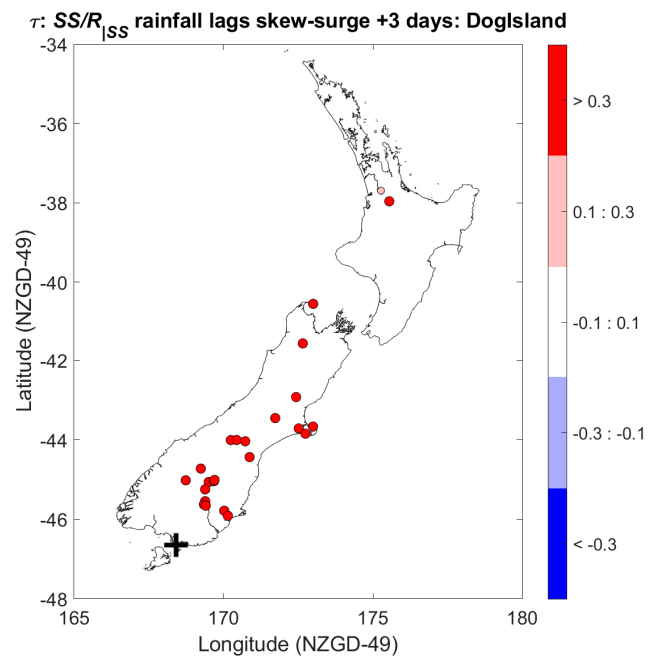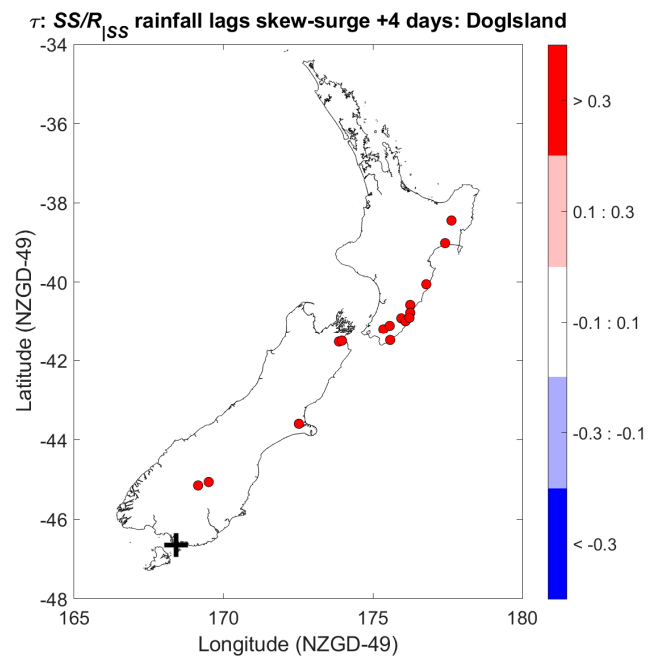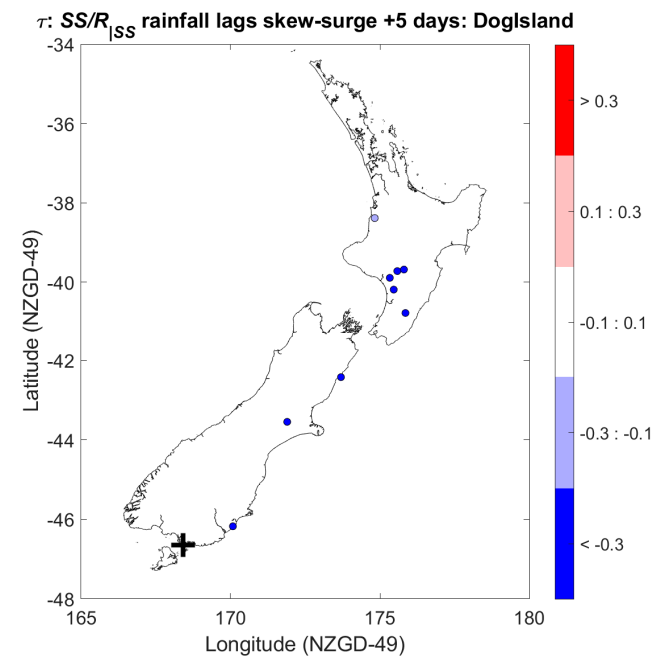

$SS/R|_R$  —skew-surge dependent on extreme rainfall

Positive lags mean that the skew-surge was experienced after the rainfall and *vice versa*.

Opua

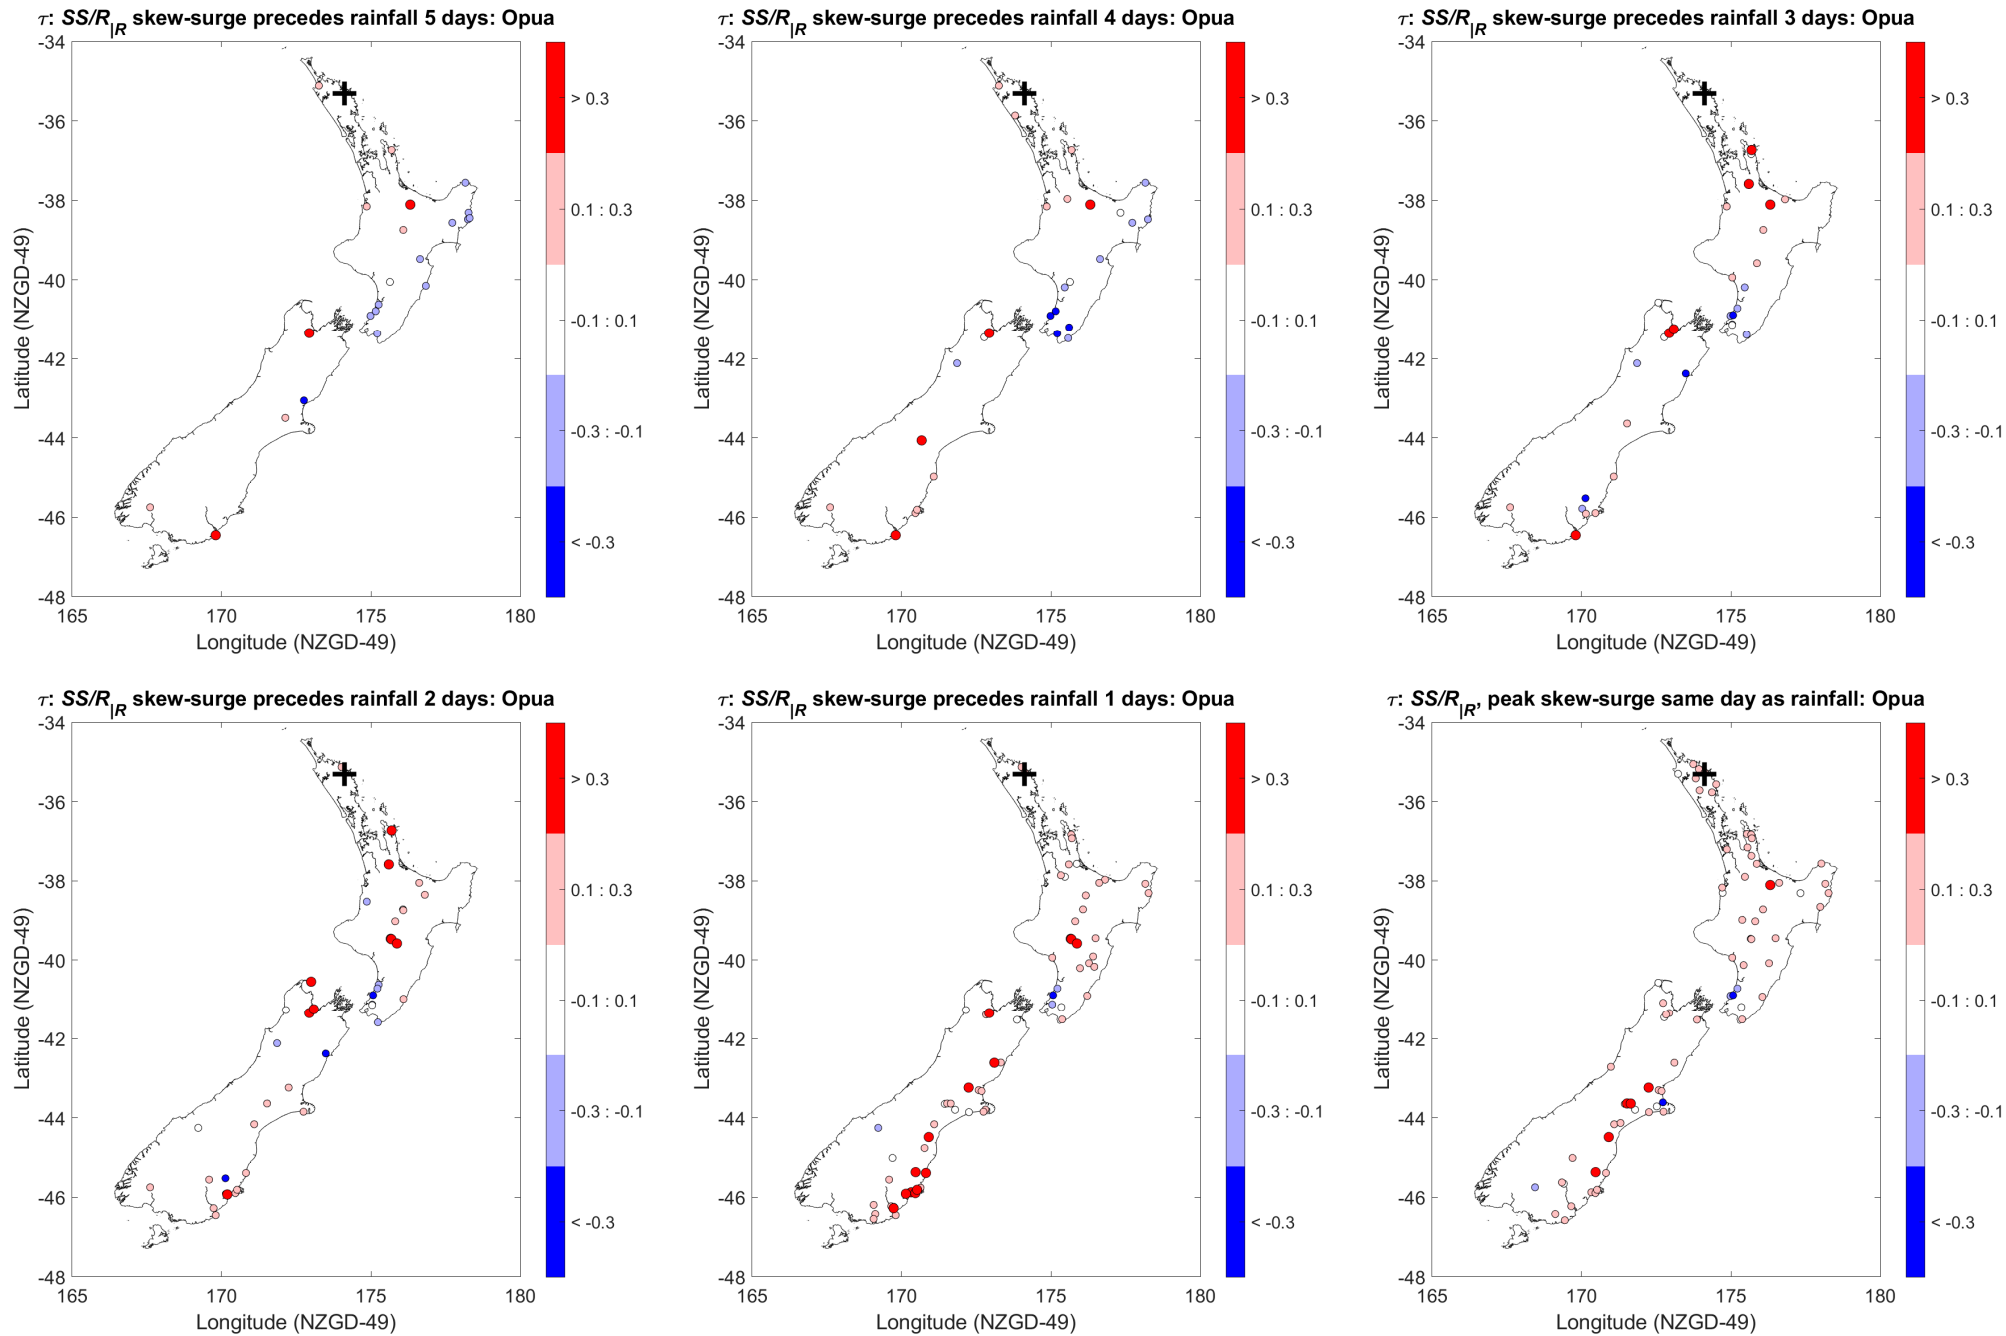

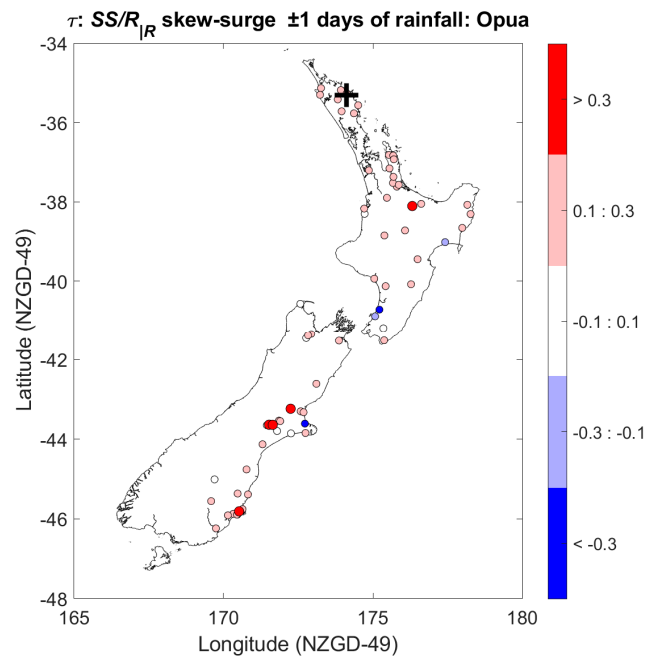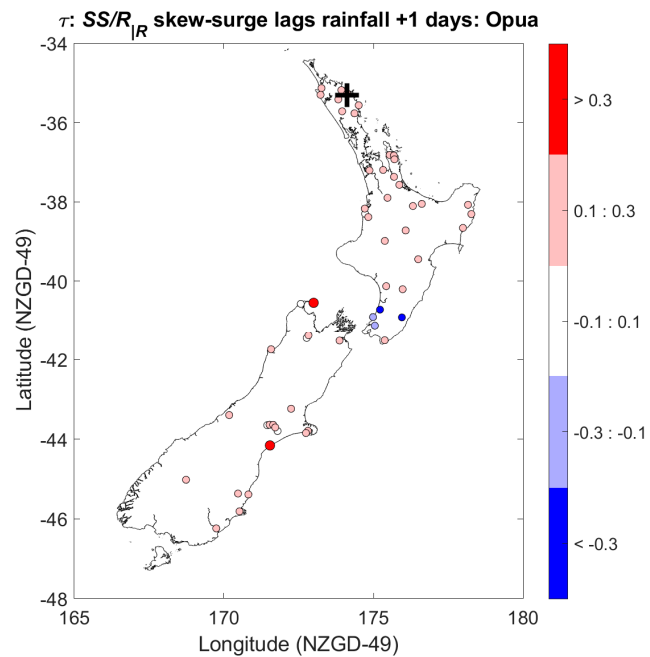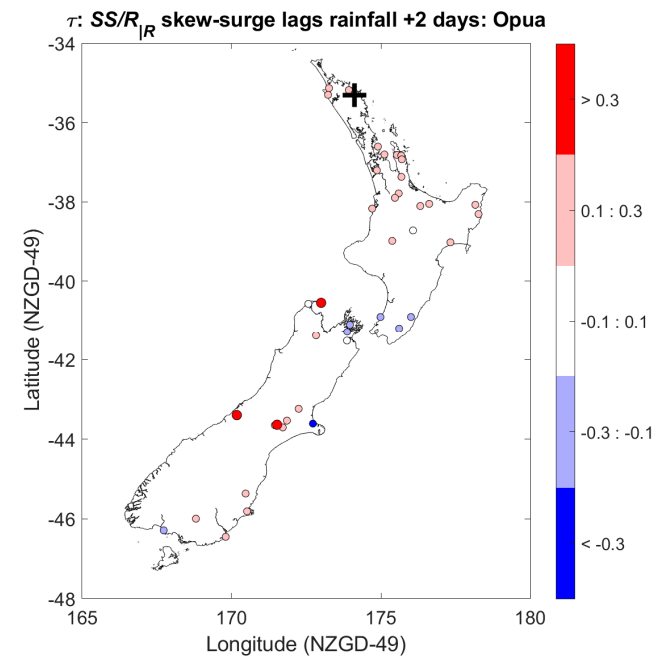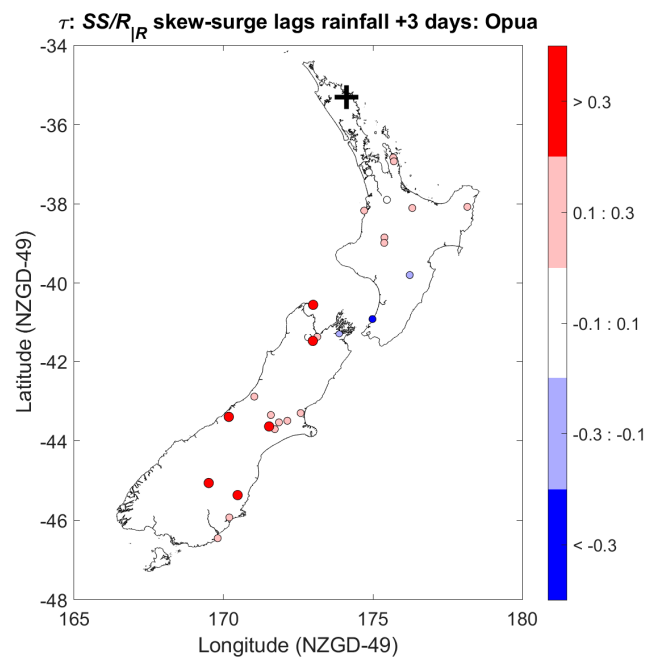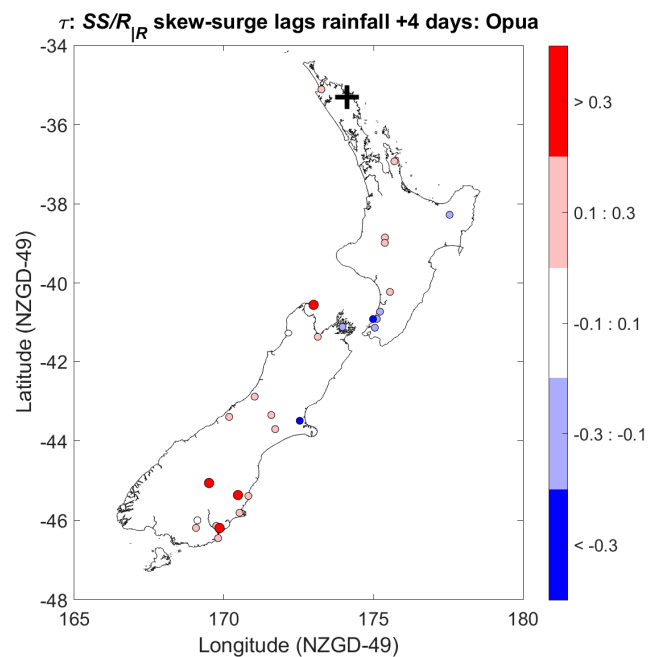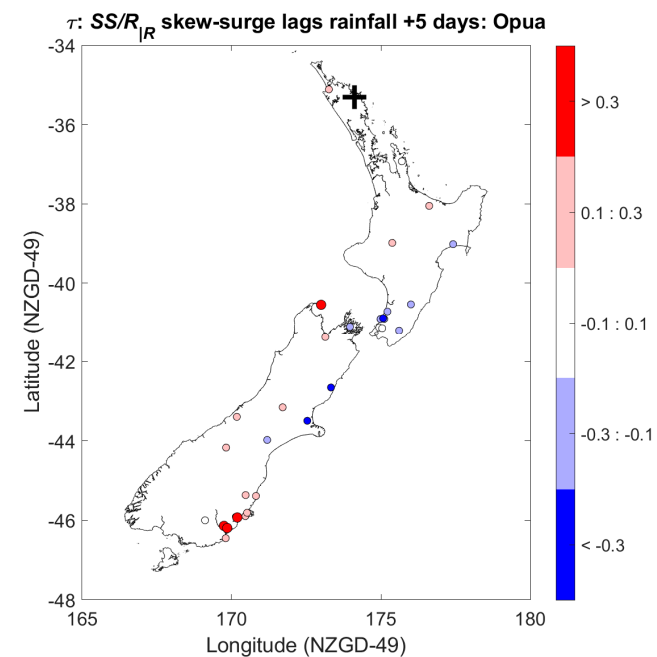



Marsden Point

$\tau$ :  $SS/R_{IR}$  skew-surge precedes rainfall 5 days: MarsdenPt

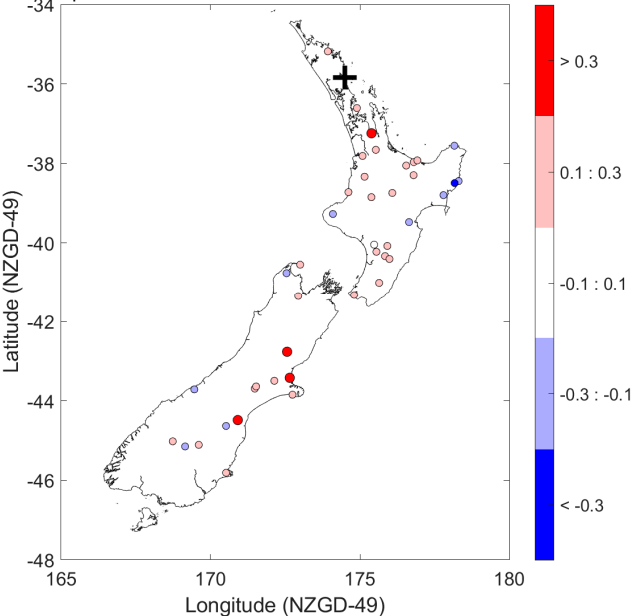

$\tau$ :  $SS/R_{IR}$  skew-surge precedes rainfall 4 days: MarsdenPt

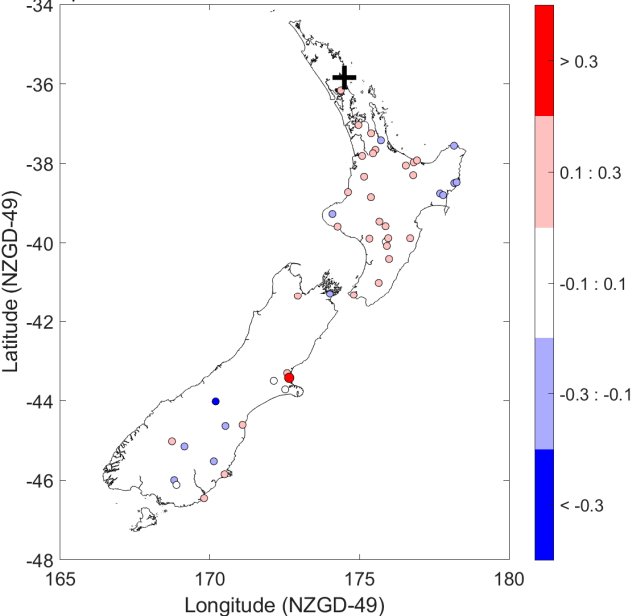

$\tau$ :  $SS/R_{IR}$  skew-surge precedes rainfall 3 days: MarsdenPt

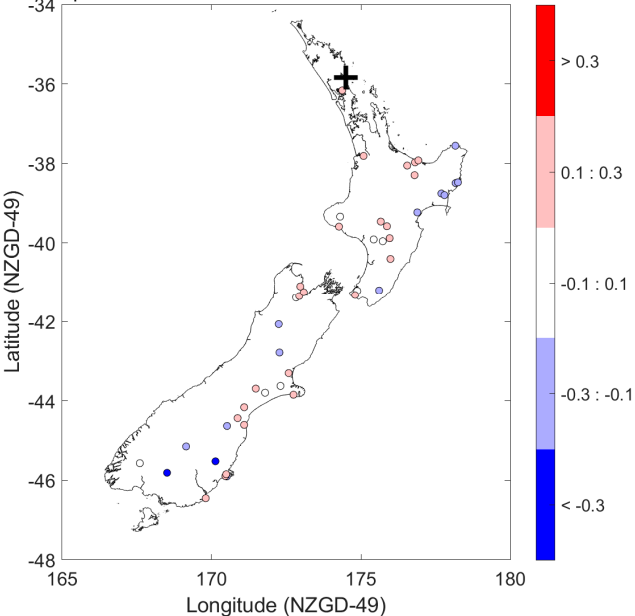

$\tau$ :  $SS/R_{IR}$  skew-surge precedes rainfall 2 days: MarsdenPt

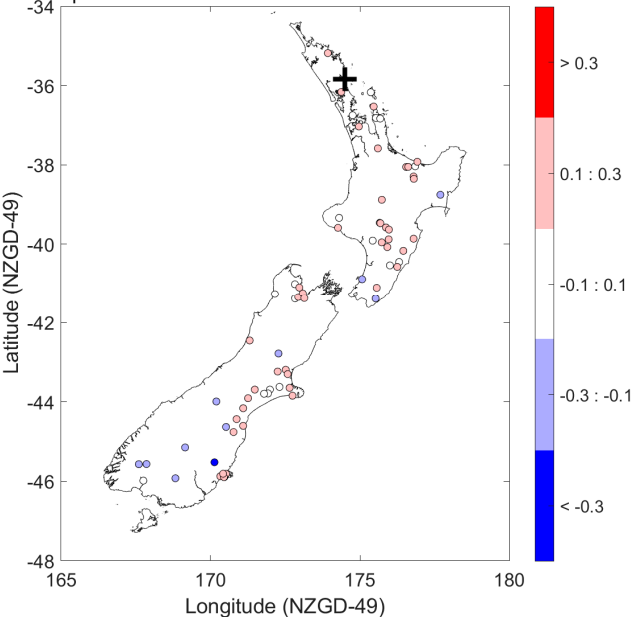

$\tau$ :  $SS/R_{IR}$  skew-surge precedes rainfall 1 days: MarsdenPt

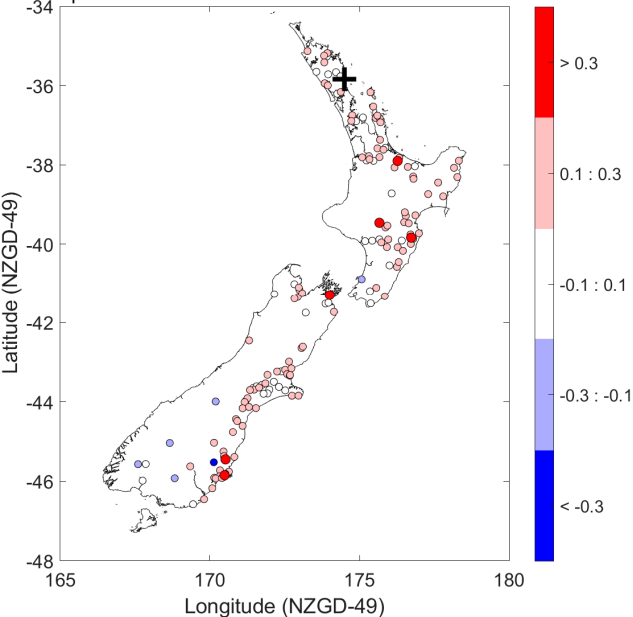

$\tau$ :  $SS/R_{IR}$  peak skew-surge same day as rainfall: MarsdenPt

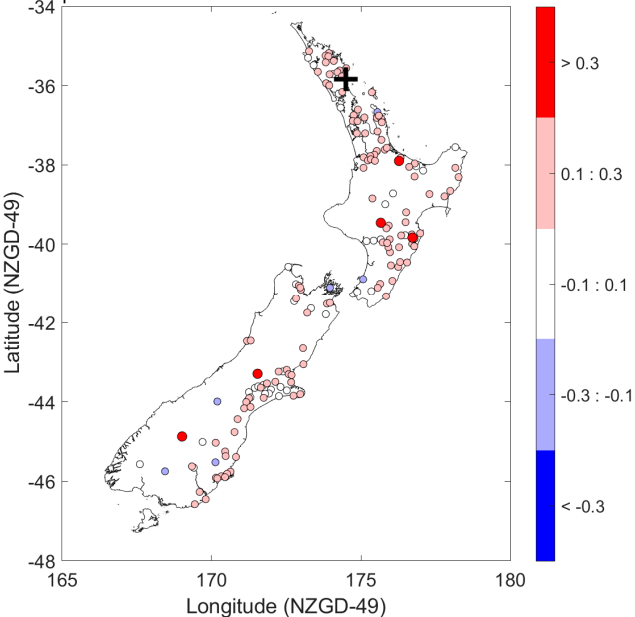

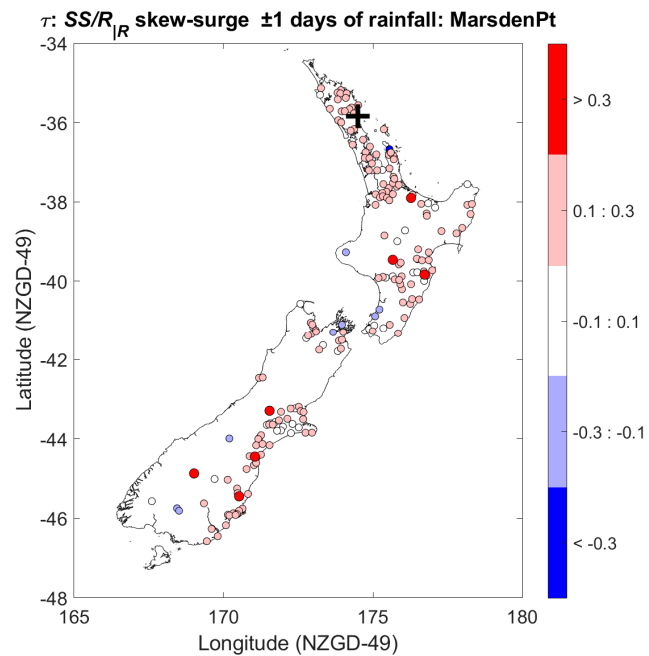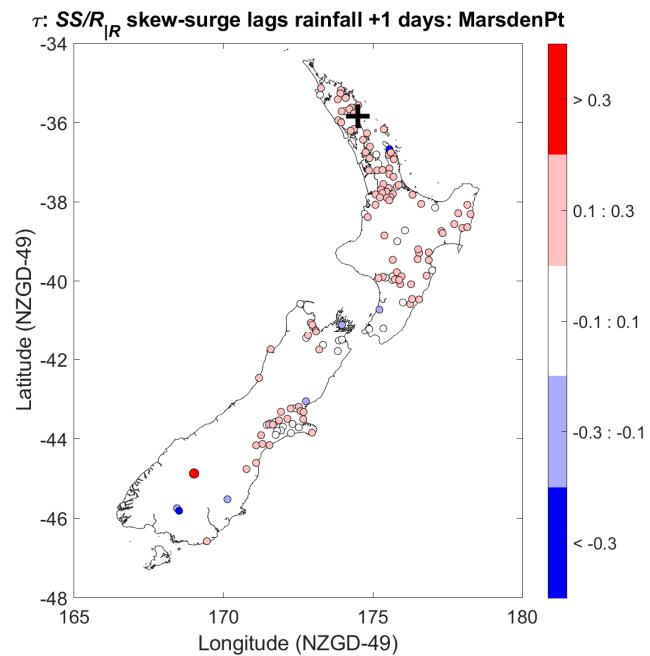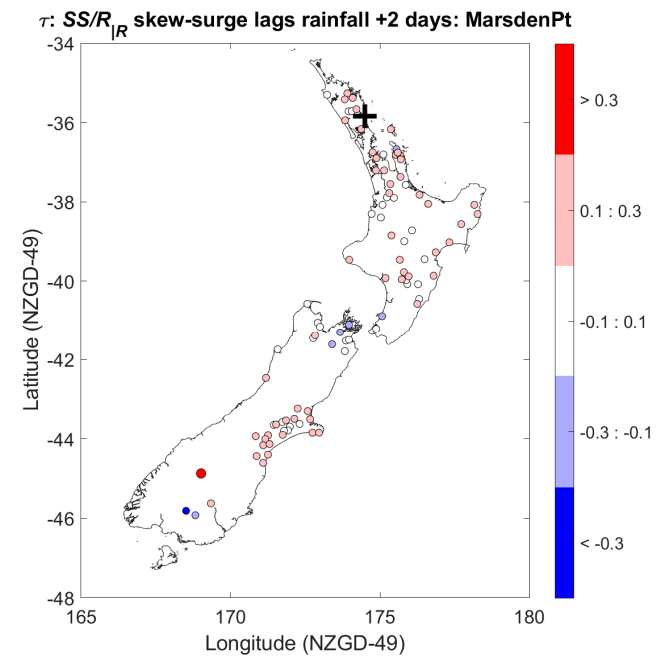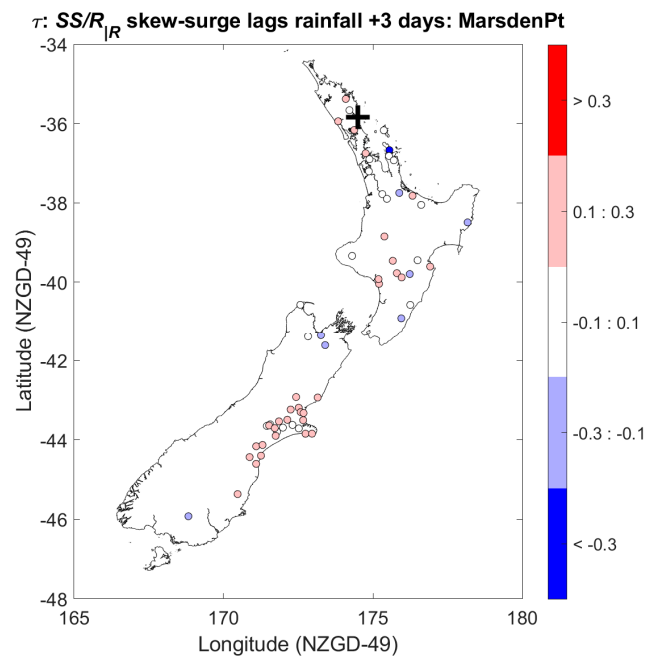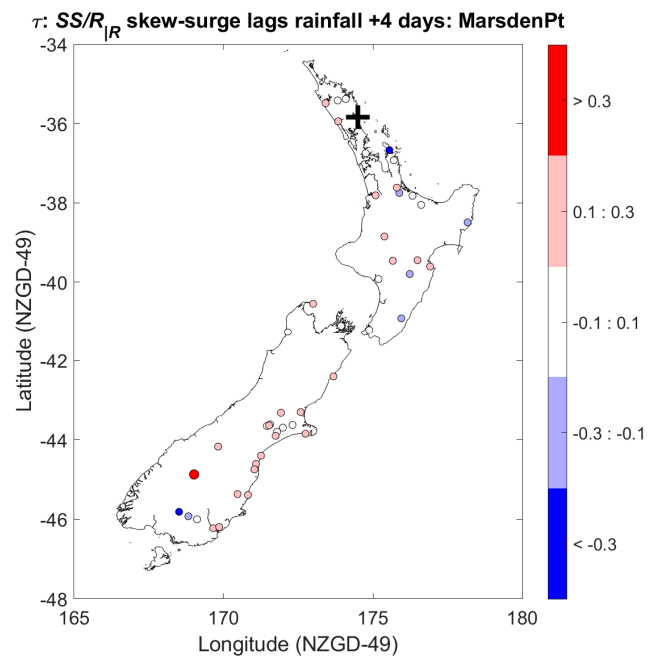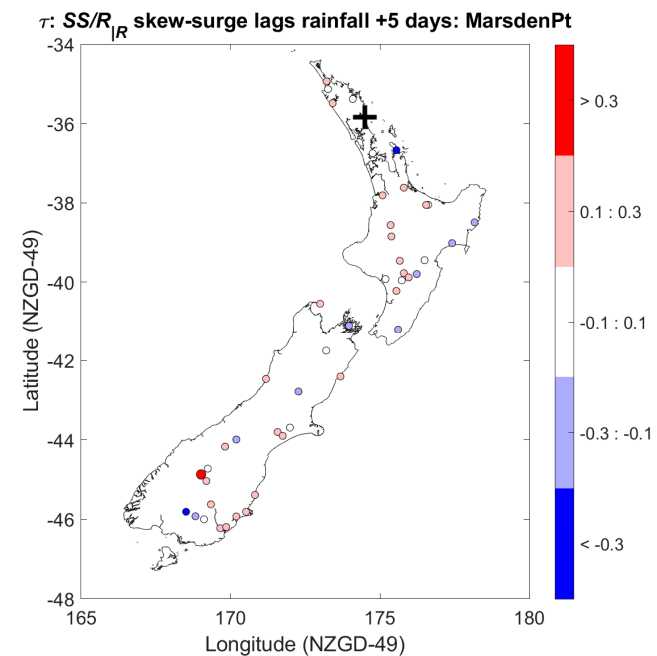

## Auckland

$\tau$ :  $SS/R_{IR}$  skew-surge precedes rainfall 5 days: Auckland

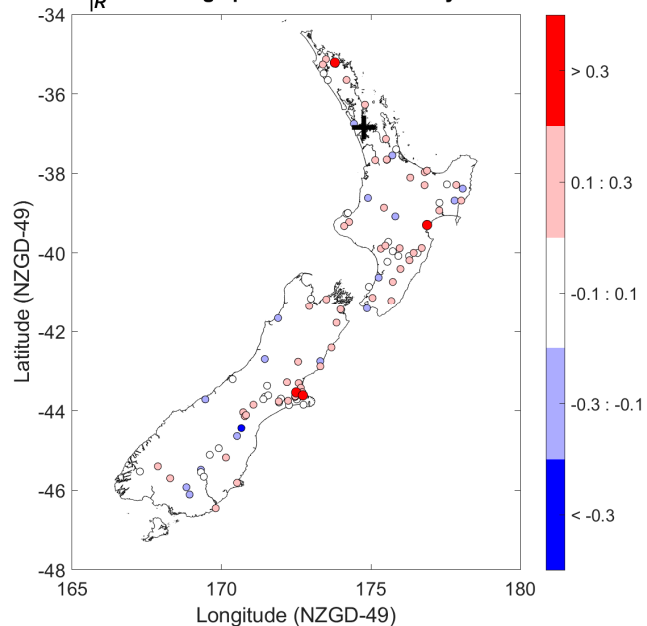

$\tau$ :  $SS/R_{IR}$  skew-surge precedes rainfall 4 days: Auckland

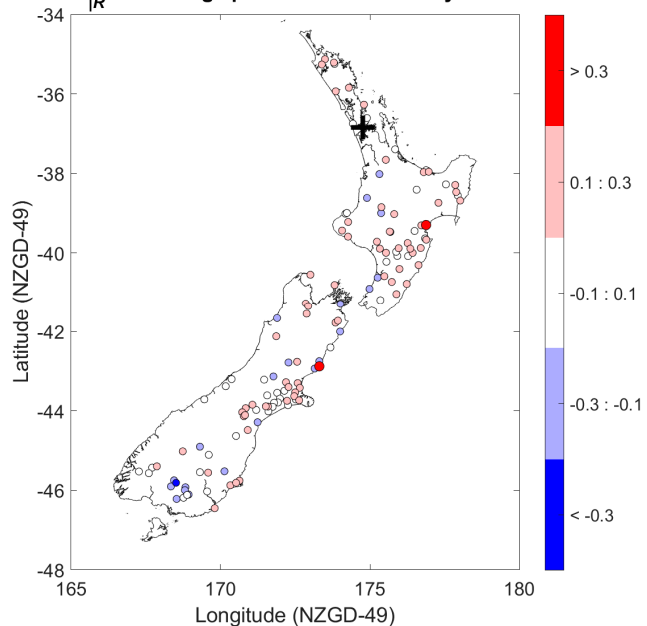

$\tau$ :  $SS/R_{IR}$  skew-surge precedes rainfall 3 days: Auckland

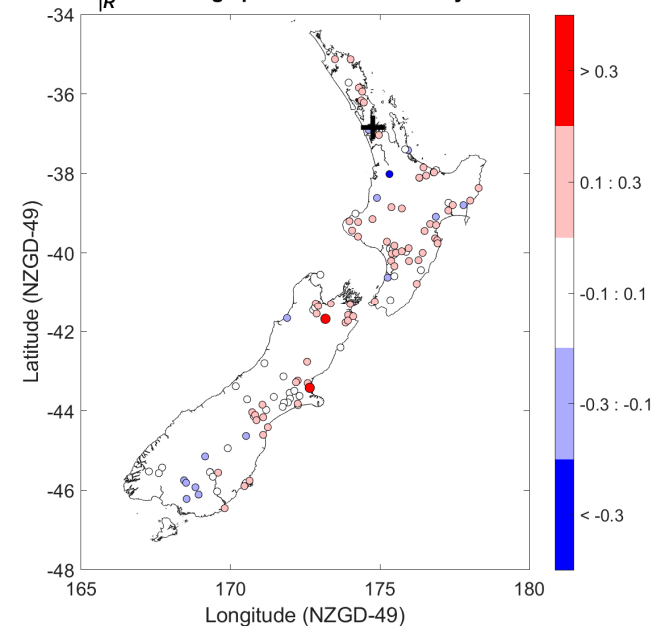

$\tau$ :  $SS/R_{IR}$  skew-surge precedes rainfall 2 days: Auckland

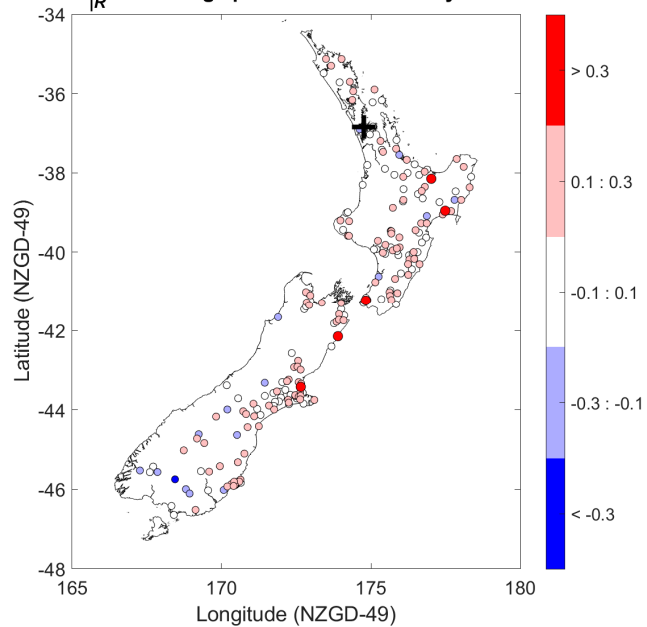

$\tau$ :  $SS/R_{IR}$  skew-surge precedes rainfall 1 days: Auckland

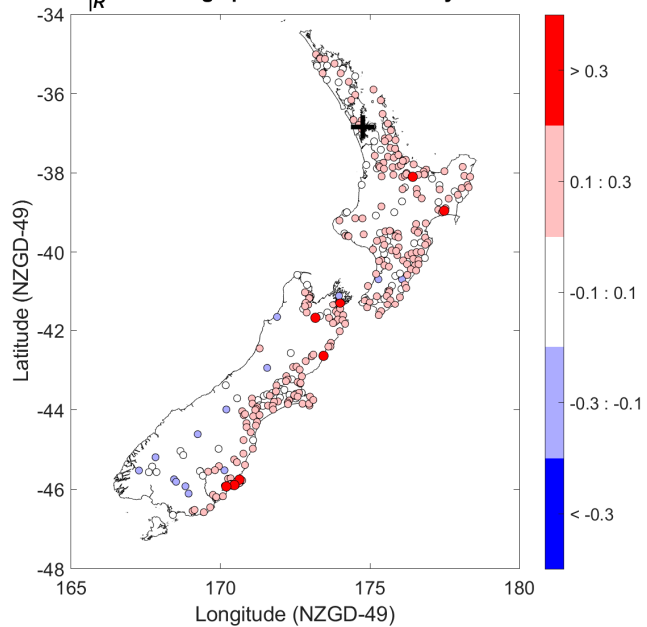

$\tau$ :  $SS/R_{IR}$  peak skew-surge same day as rainfall: Auckland

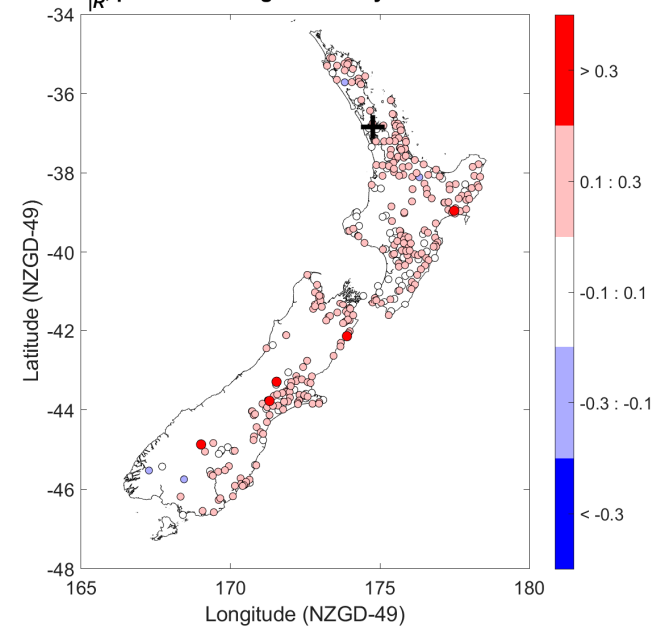

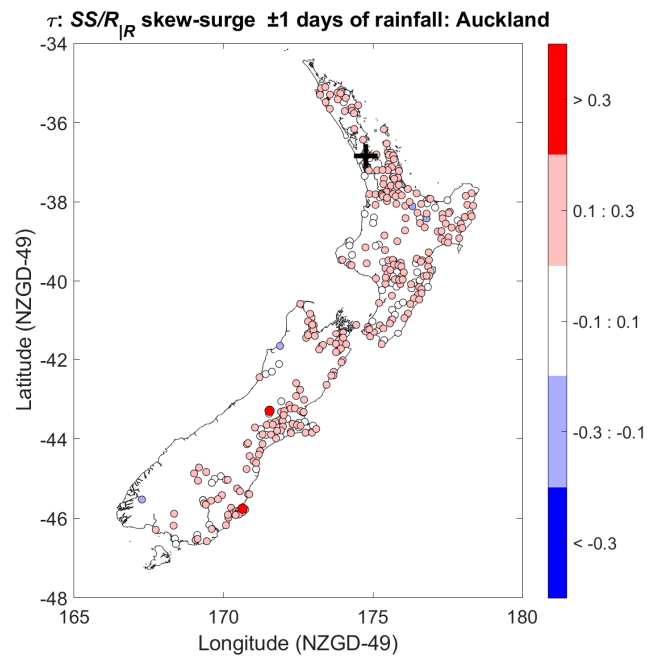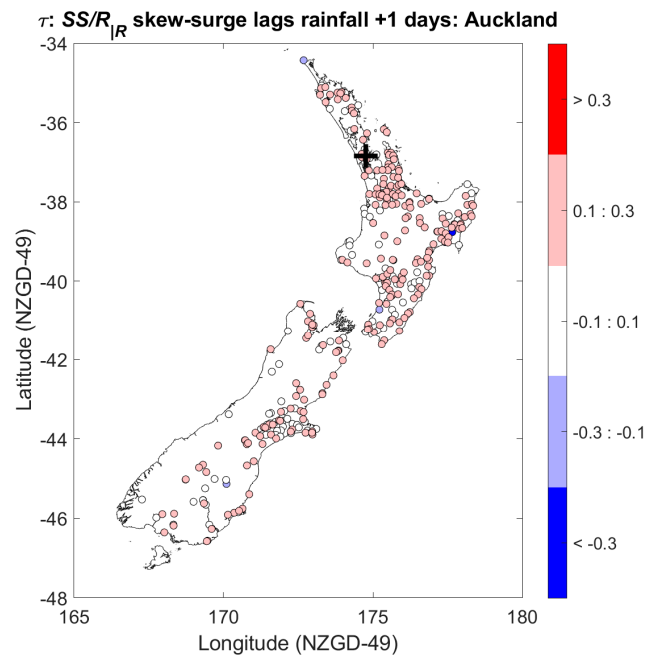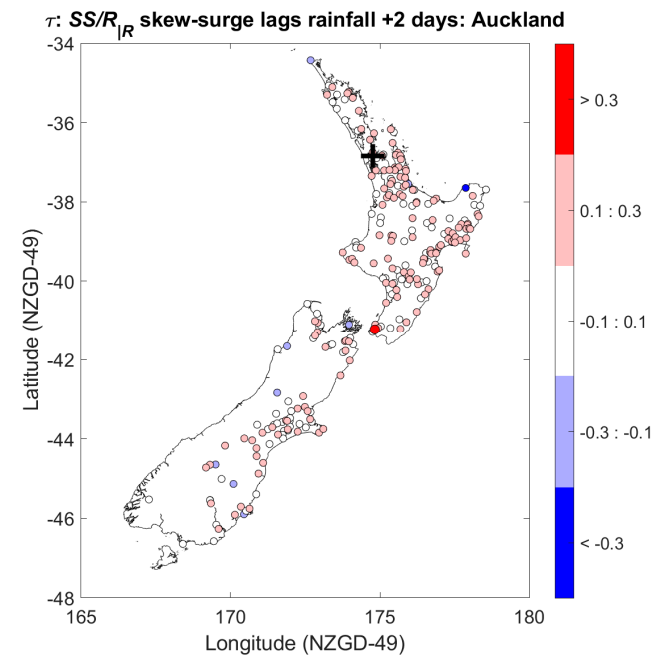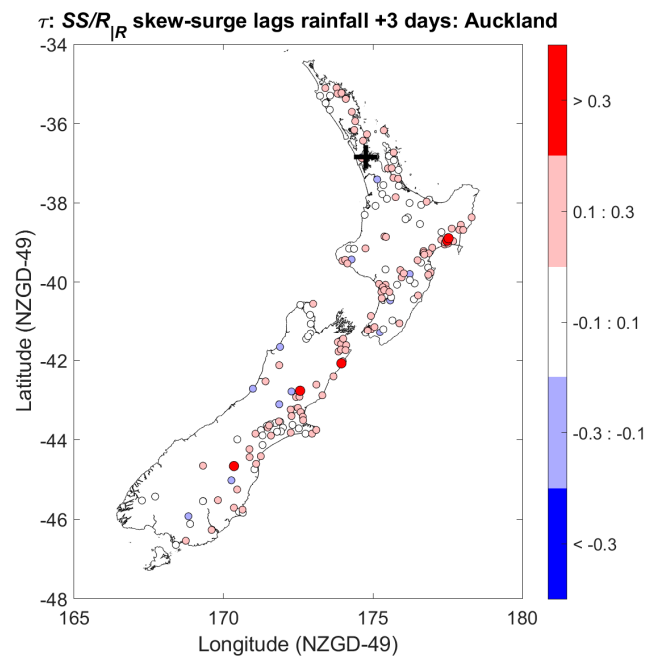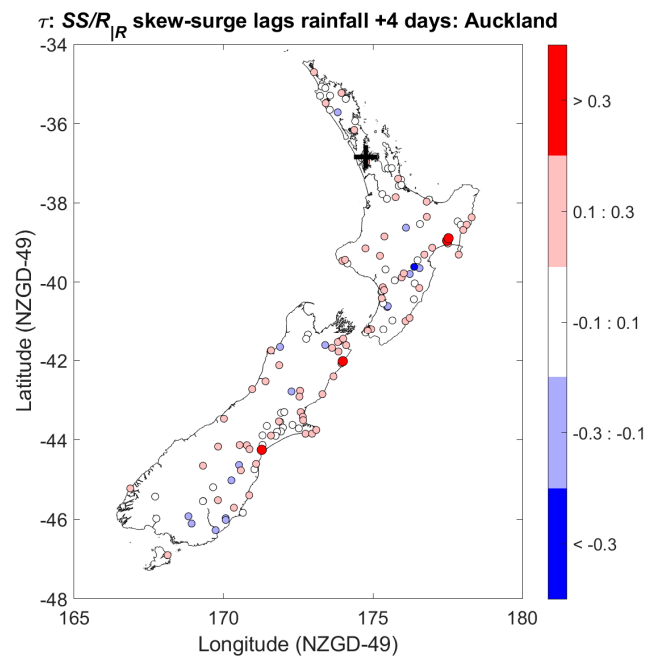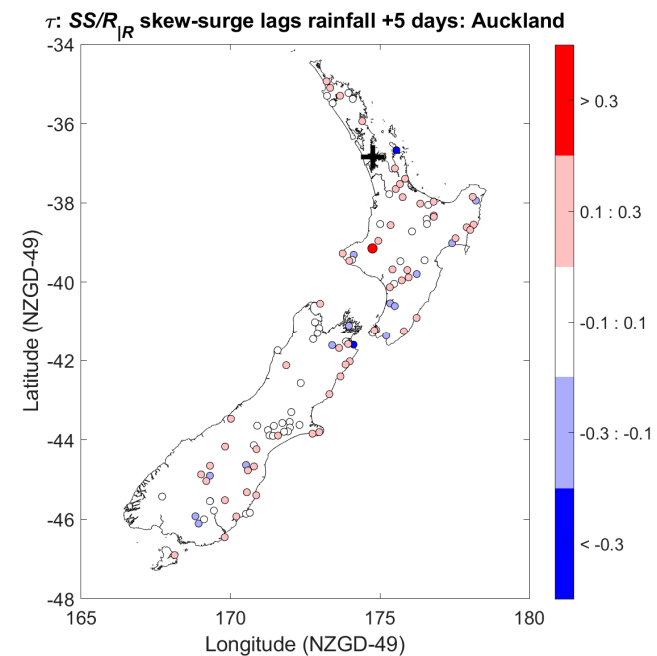

Tararu

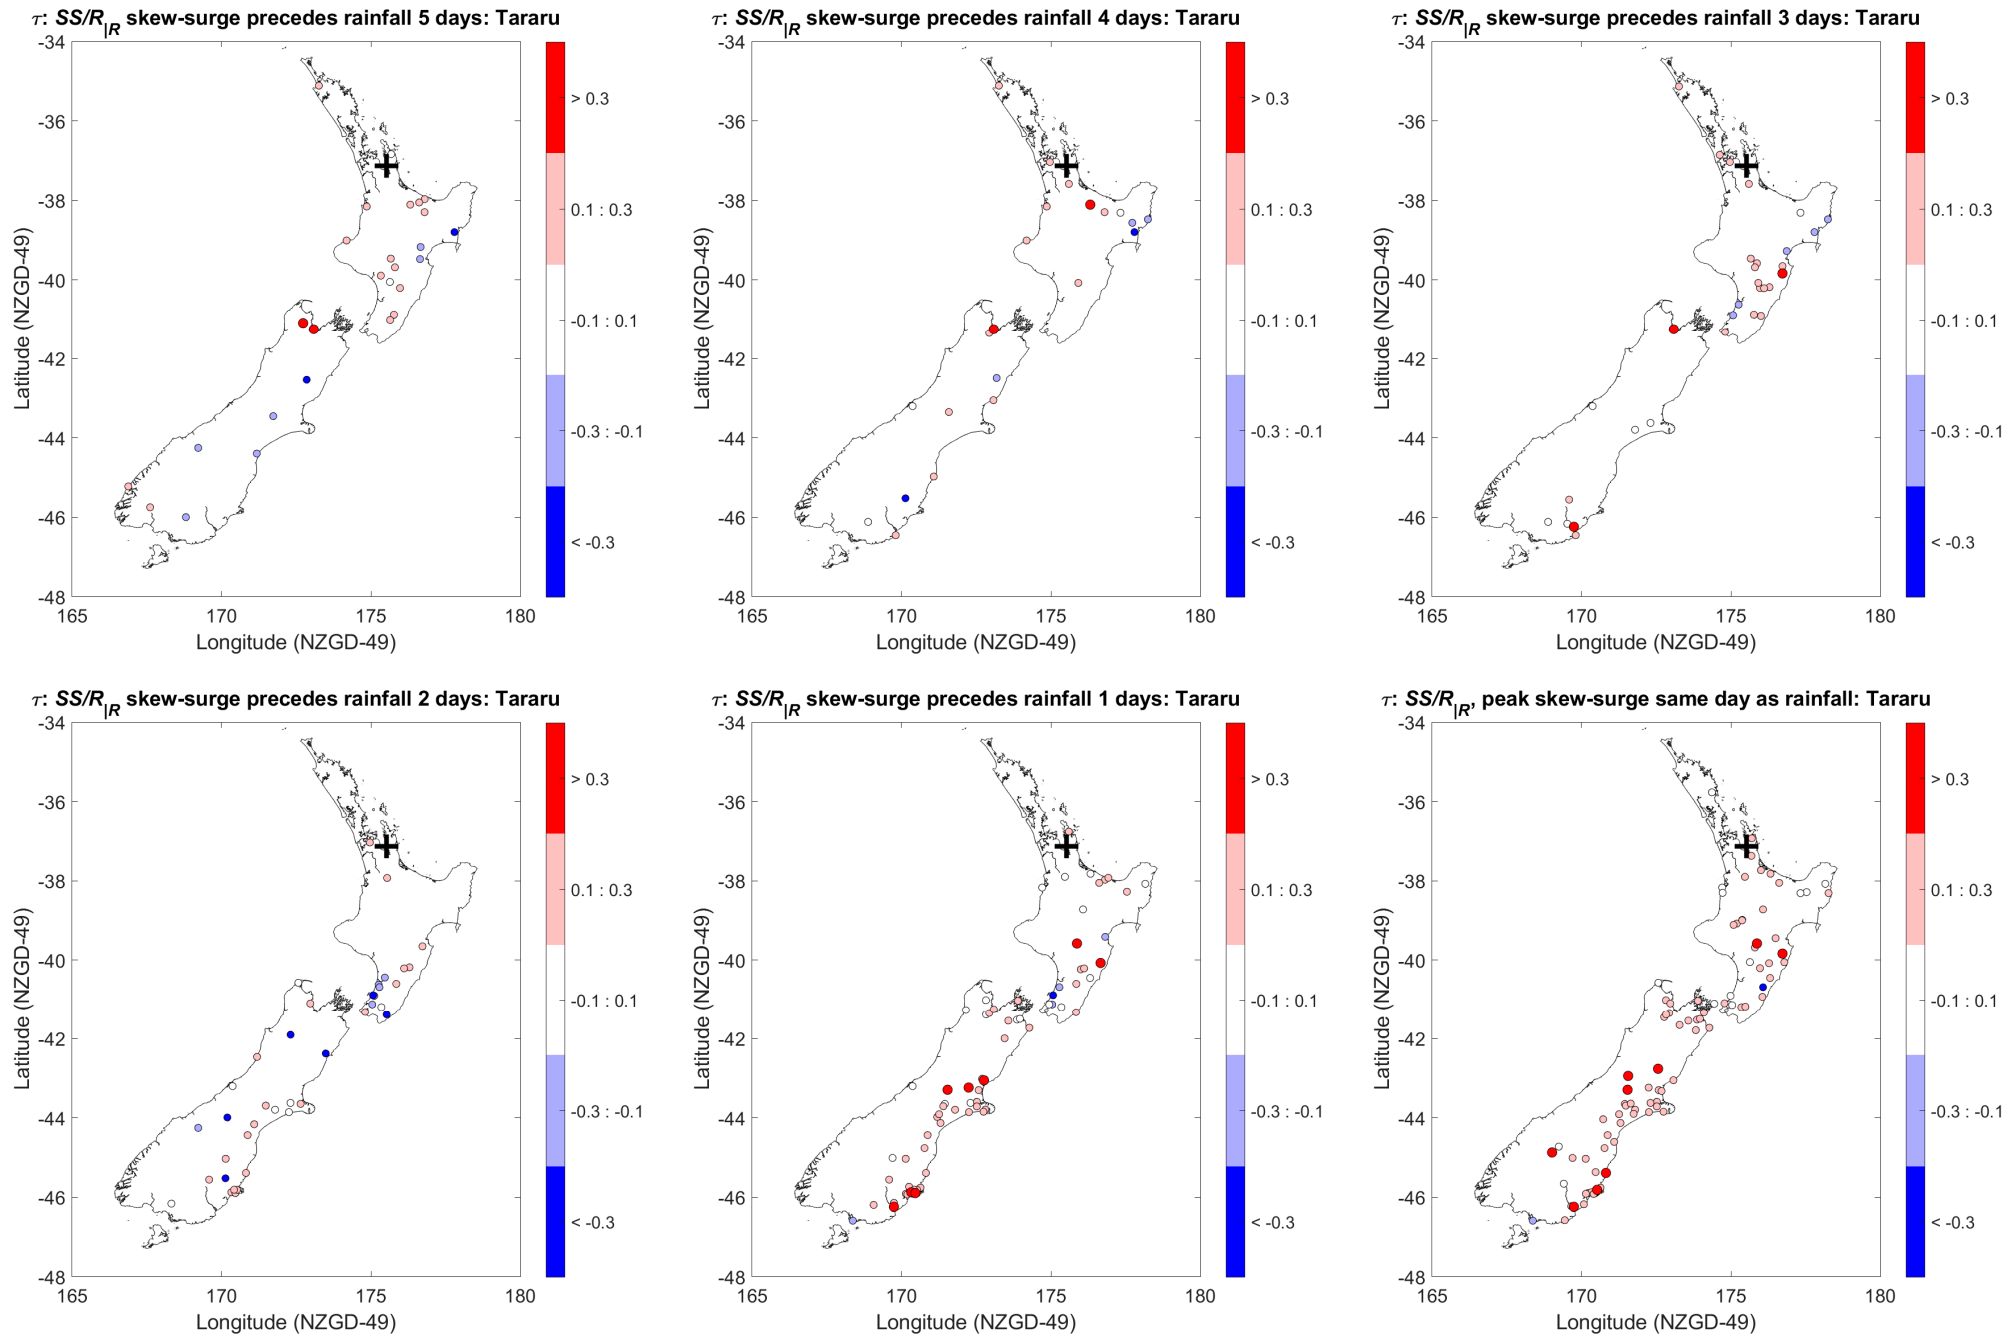

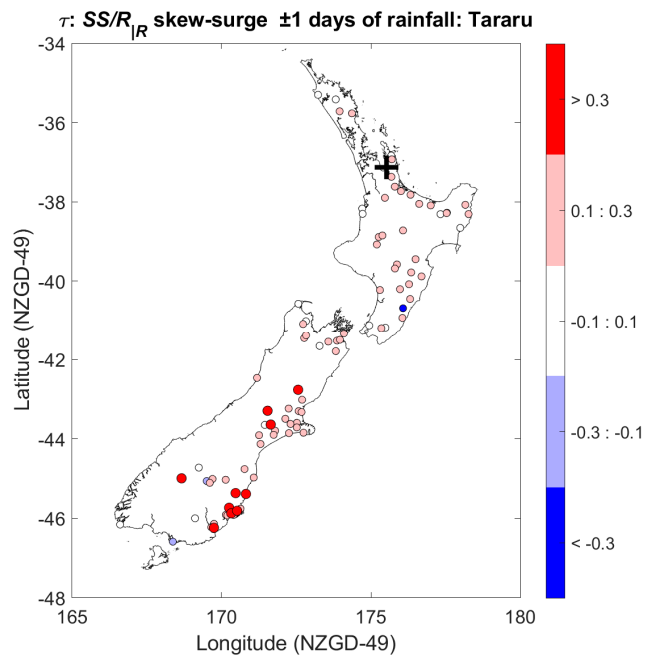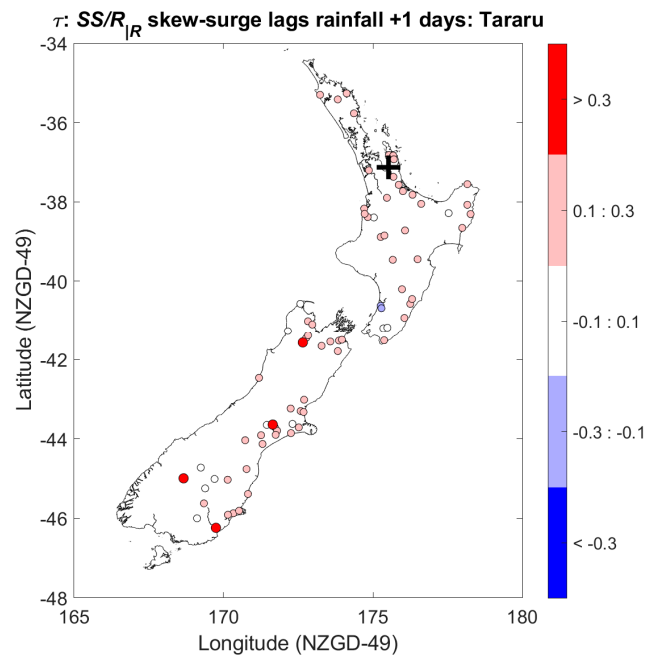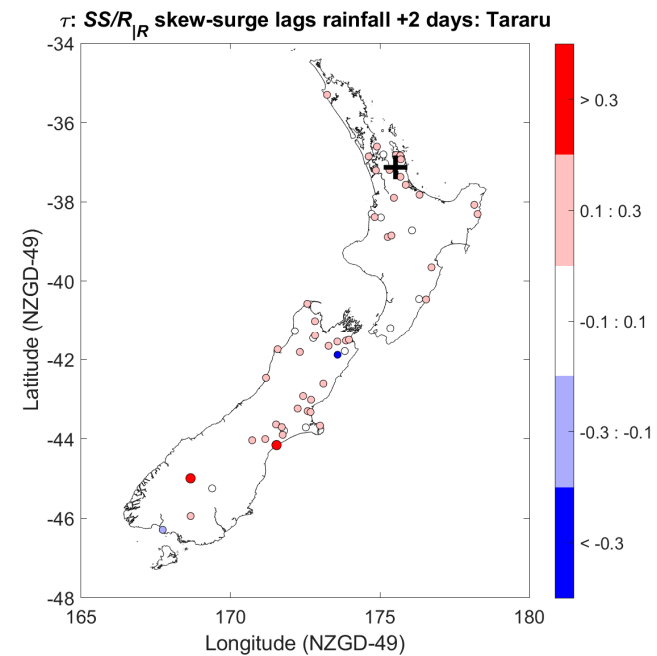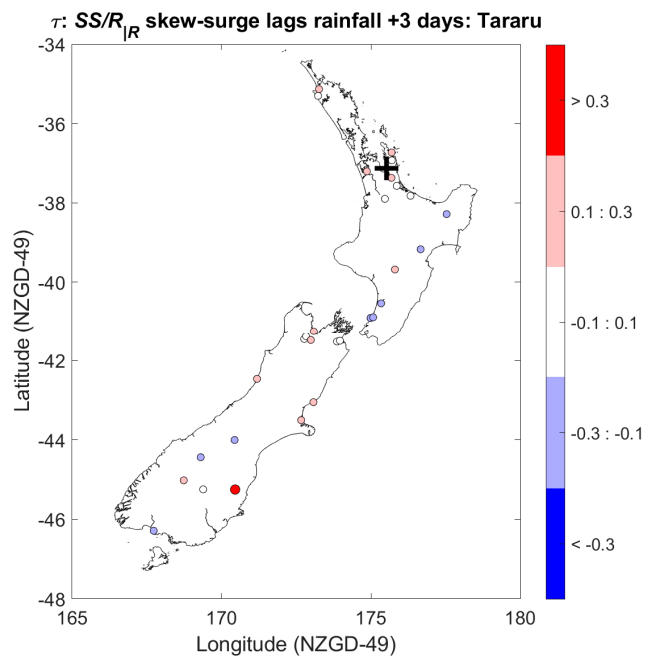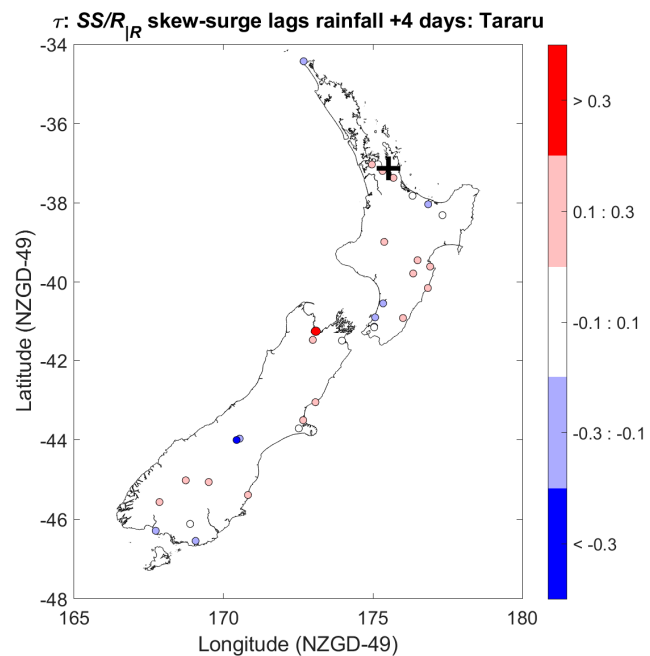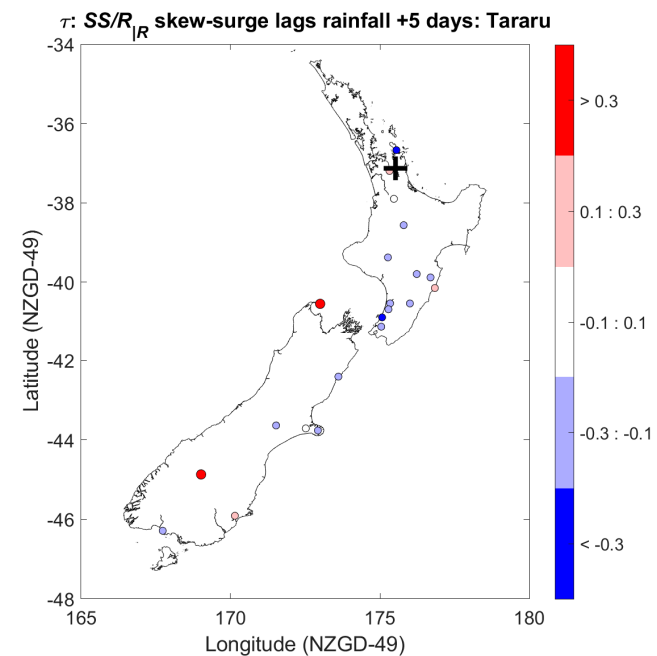

Moturiki

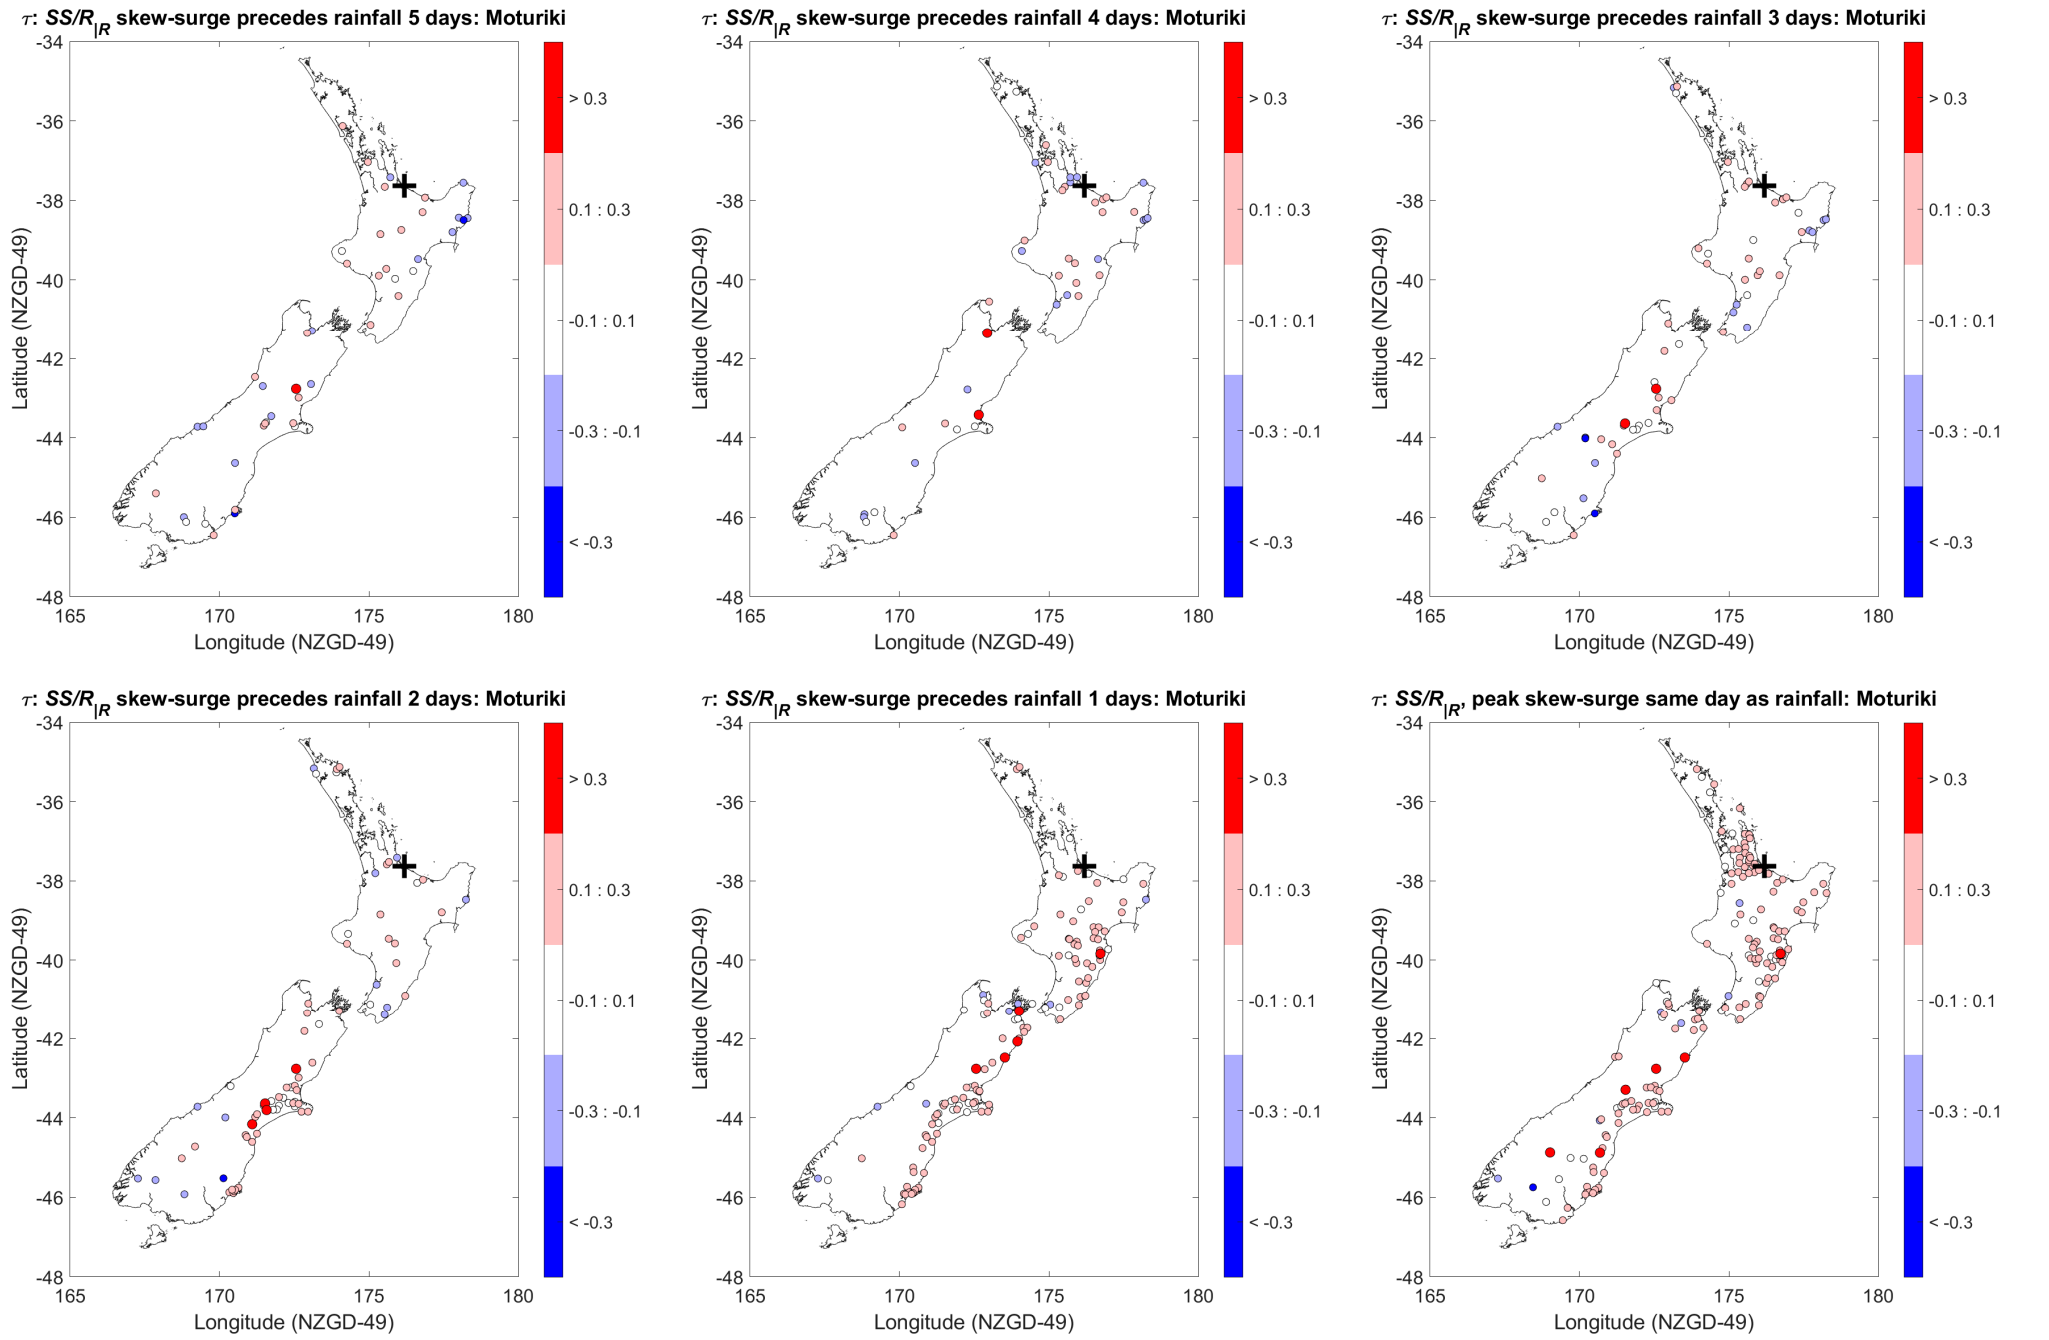

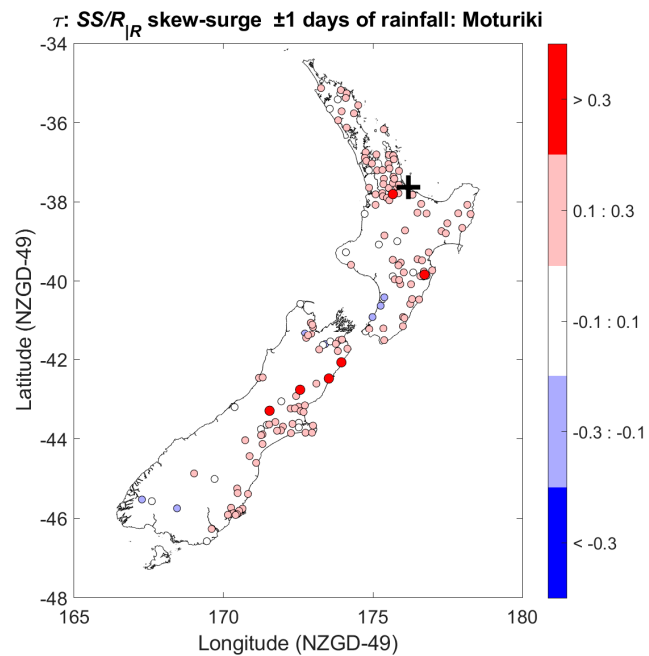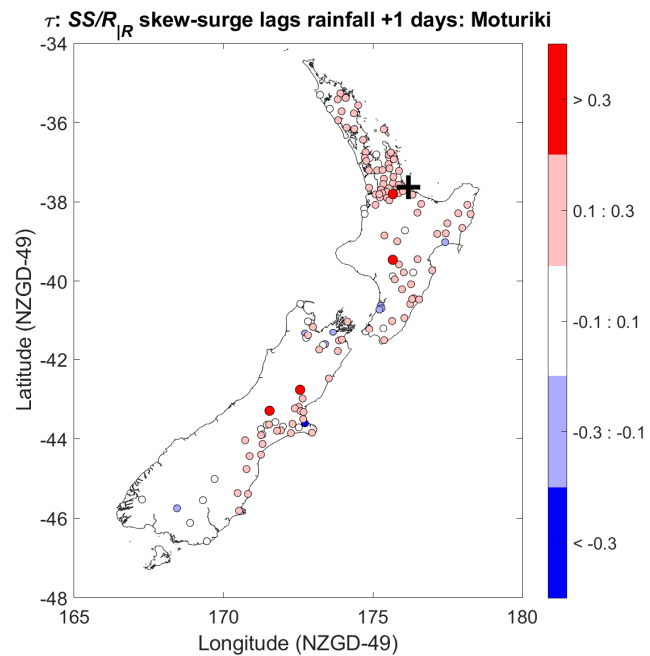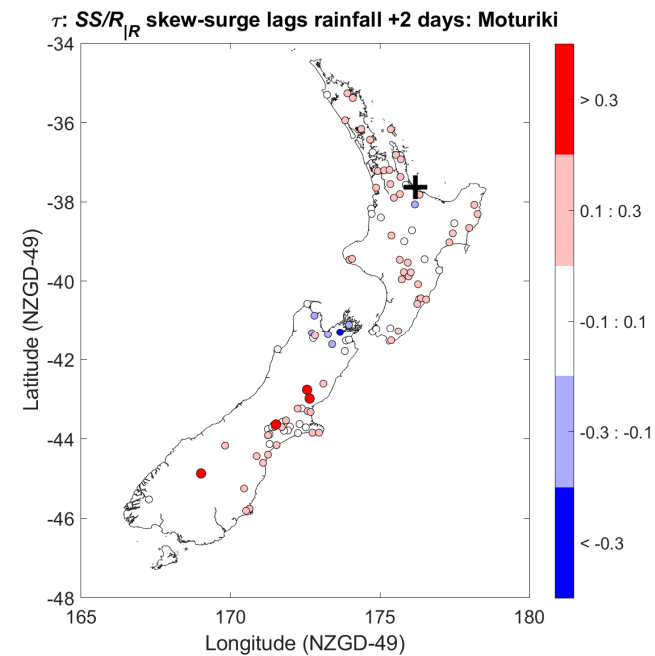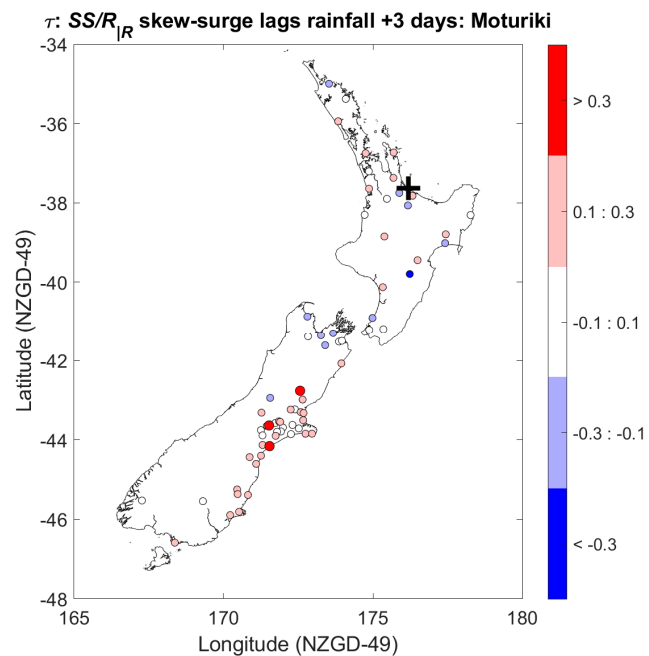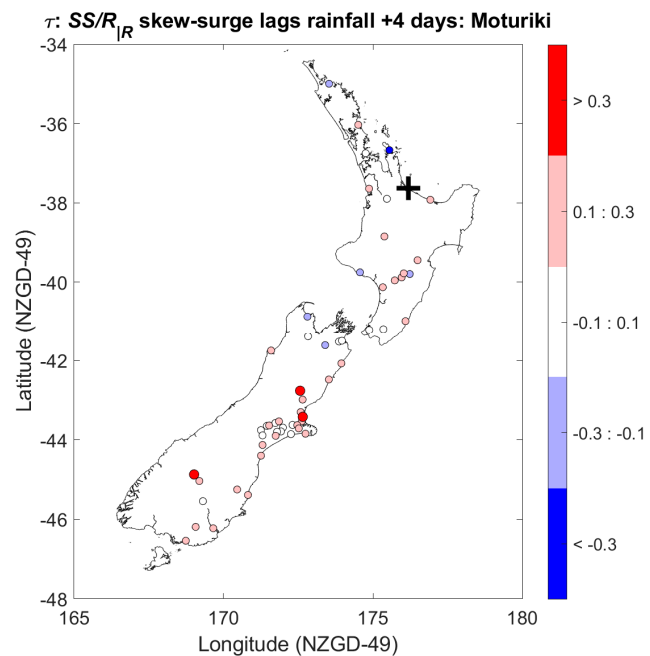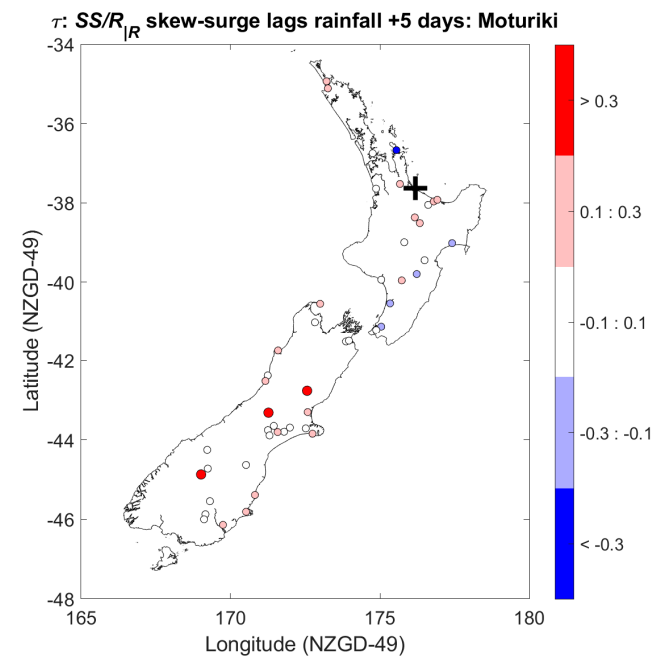



Taranaki

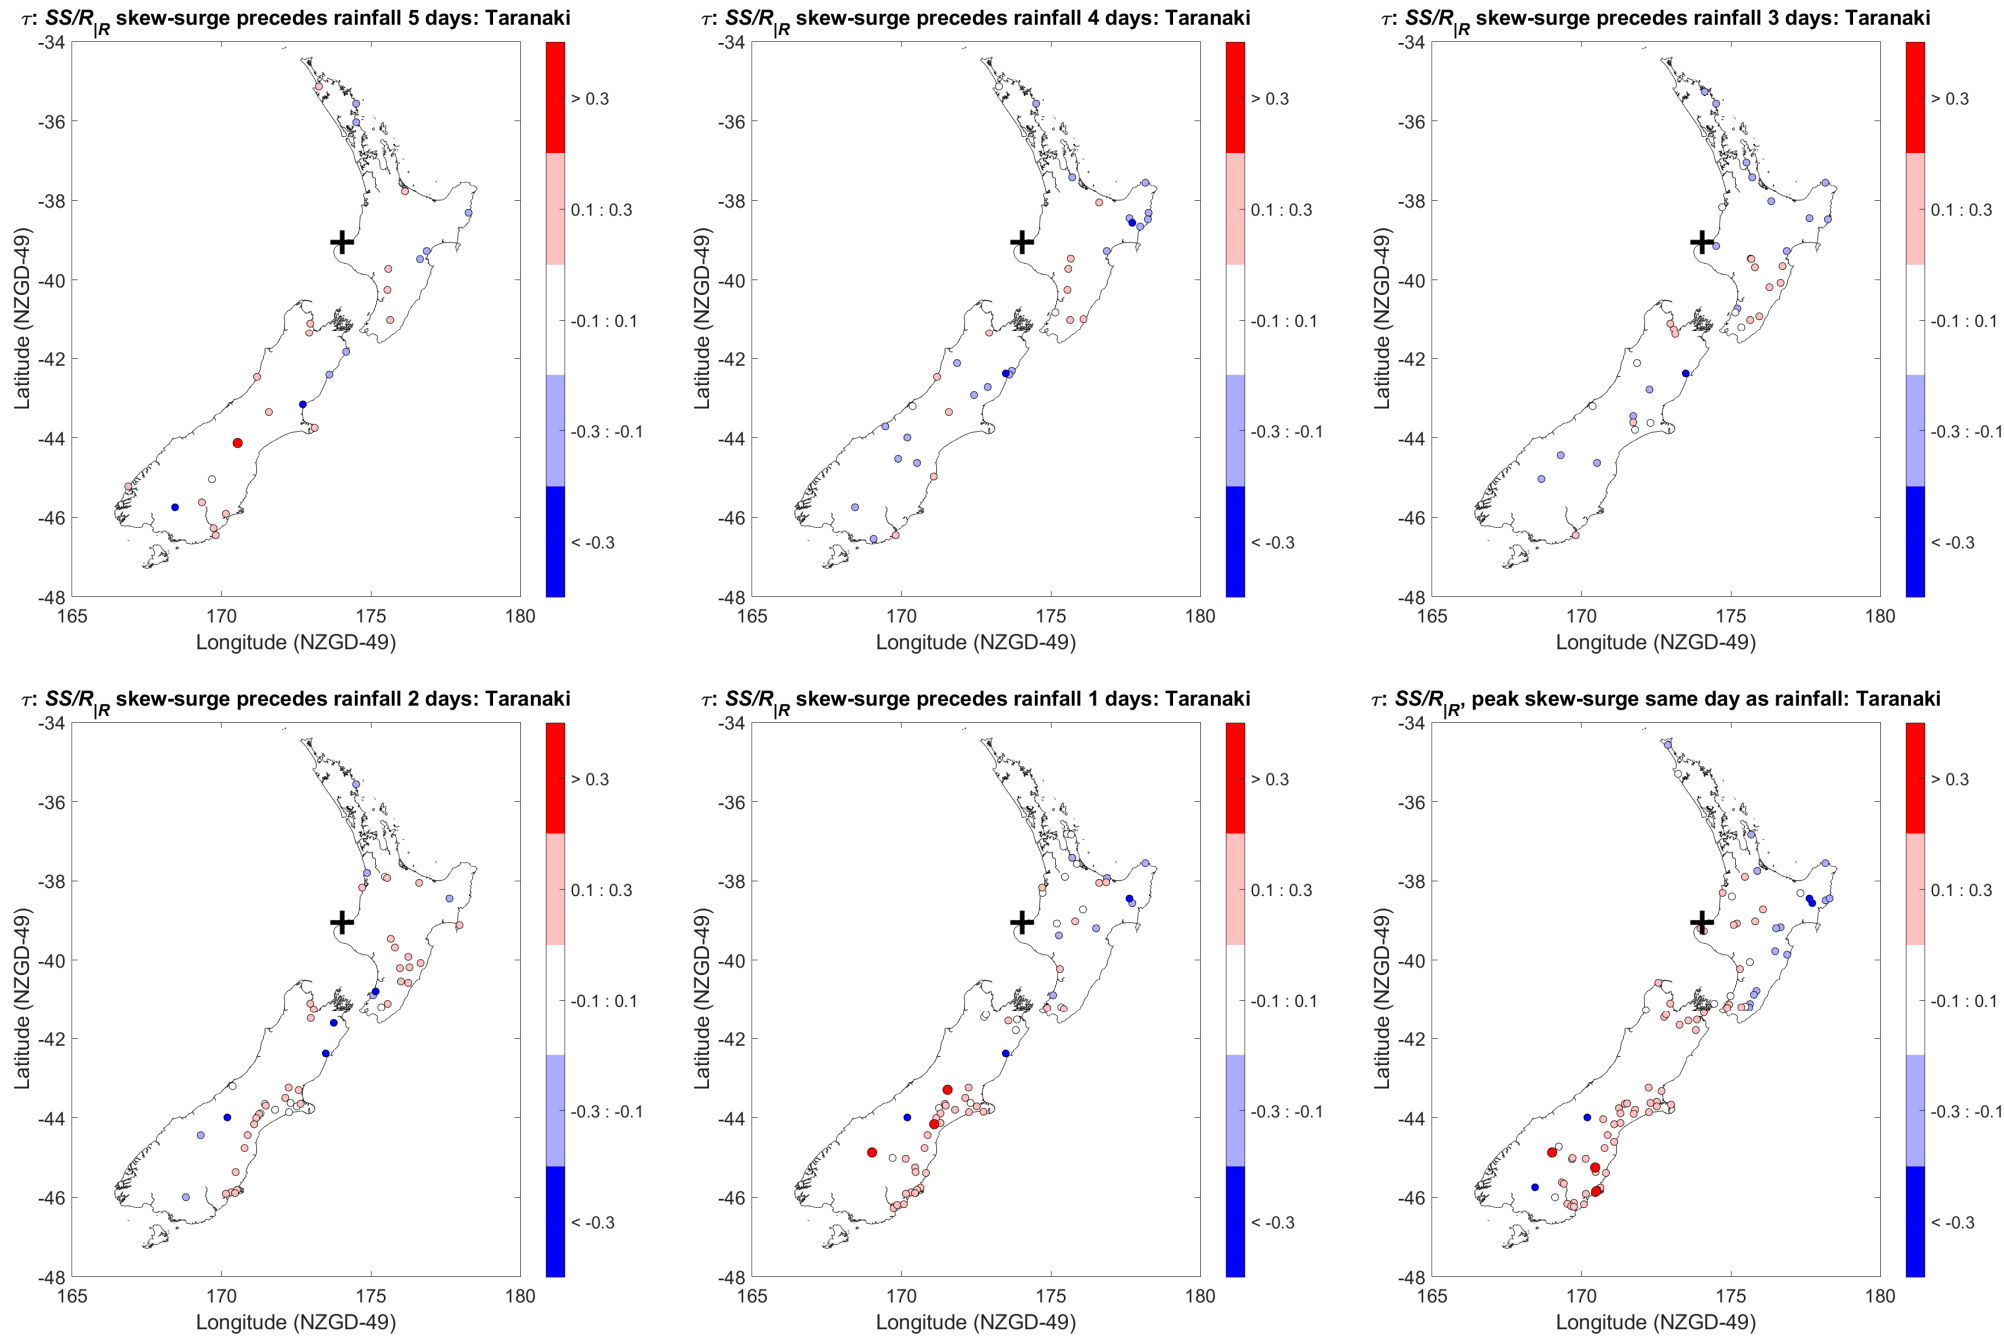

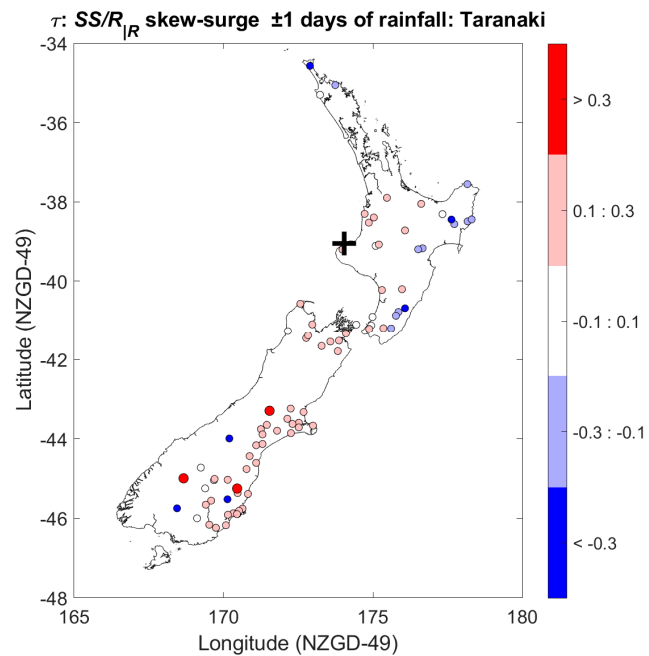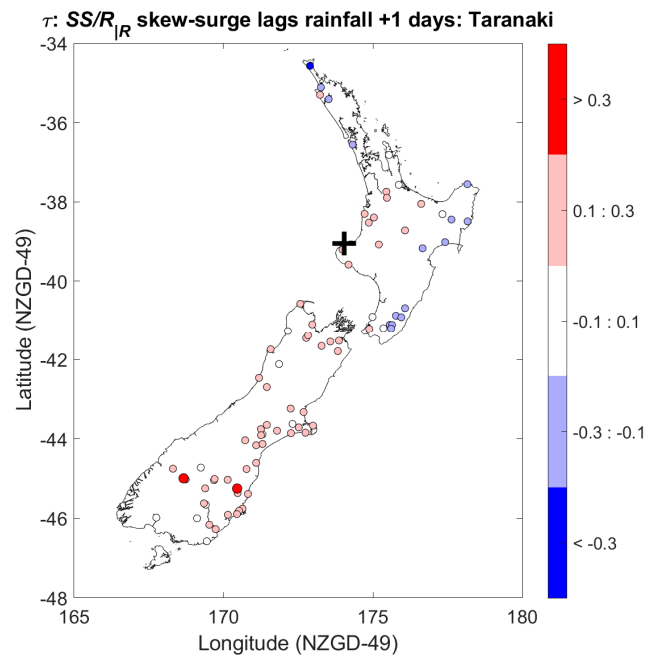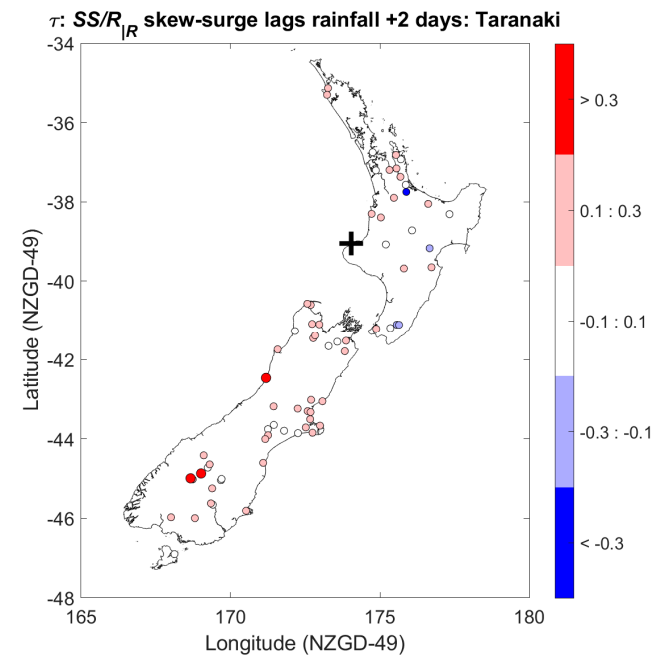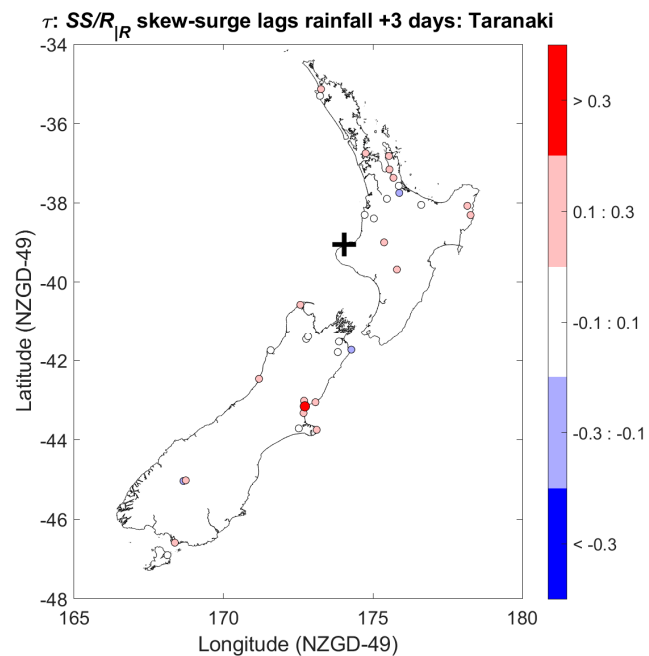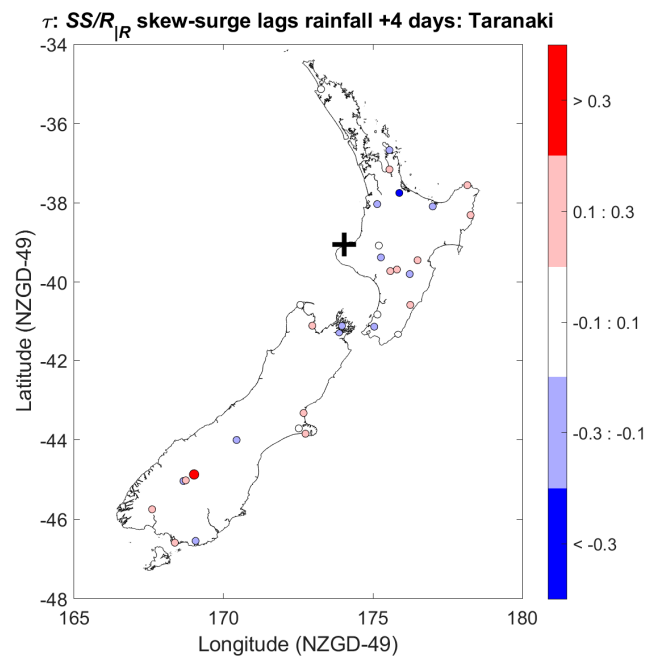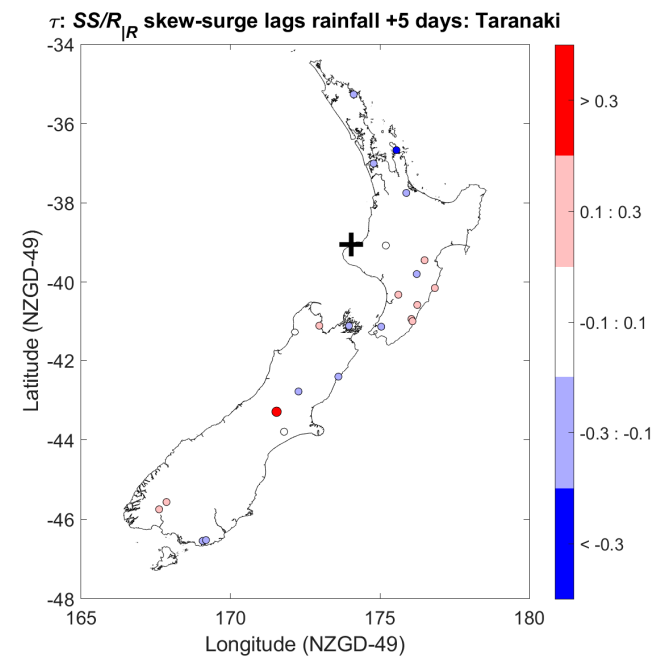

Nelson

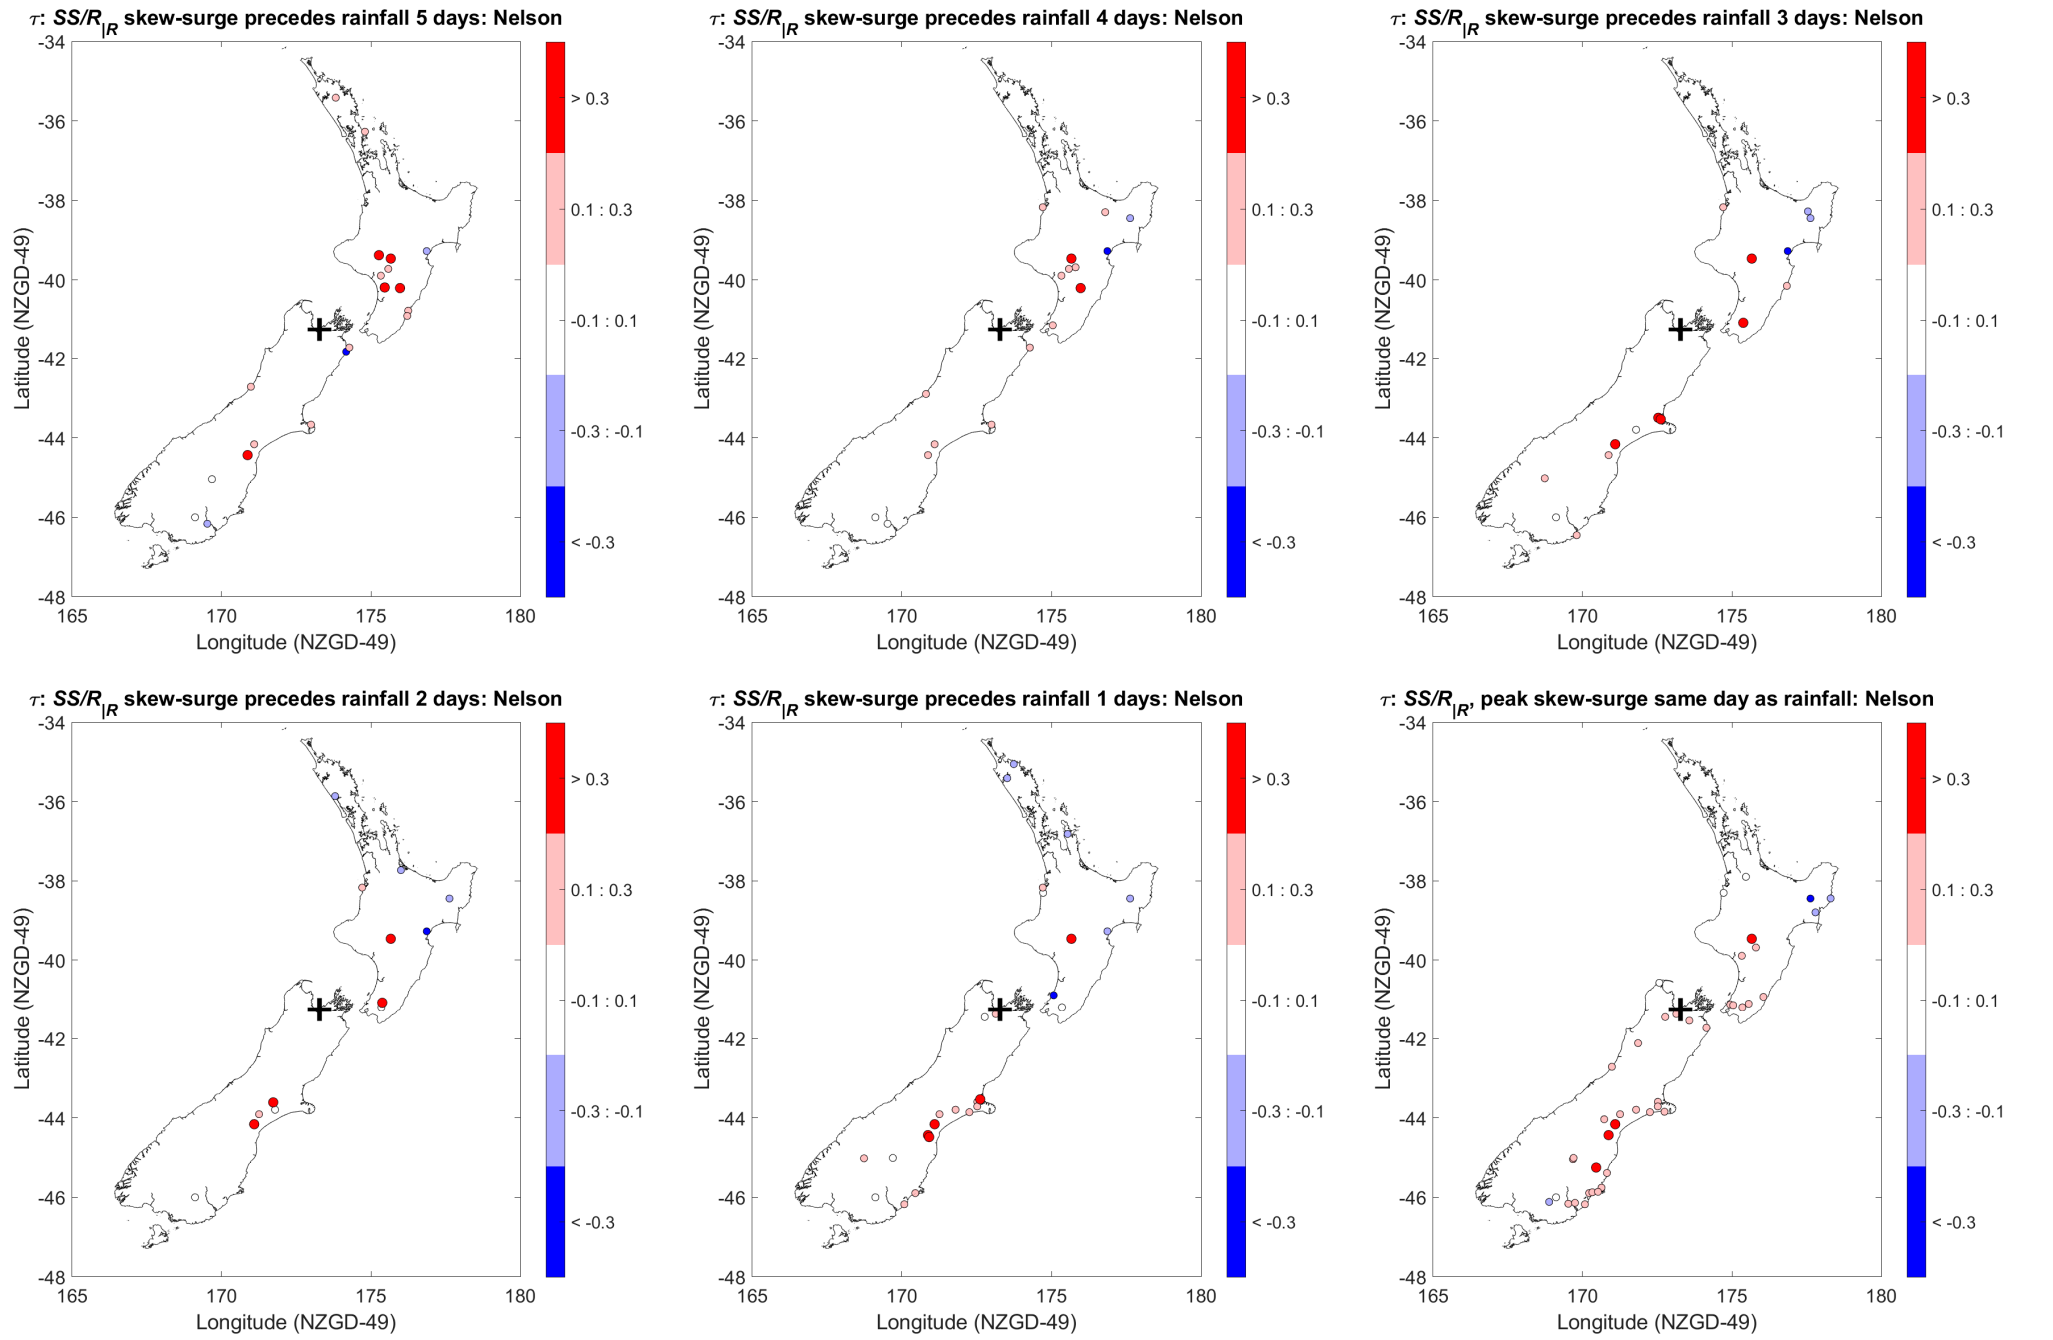

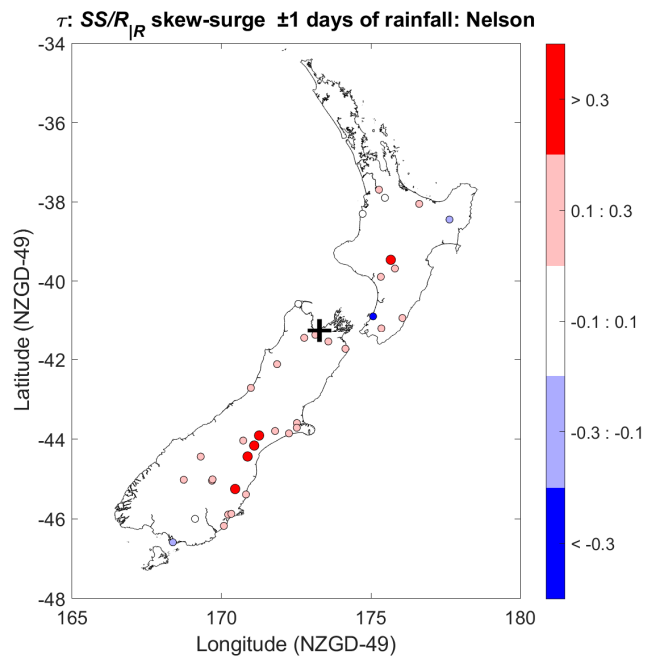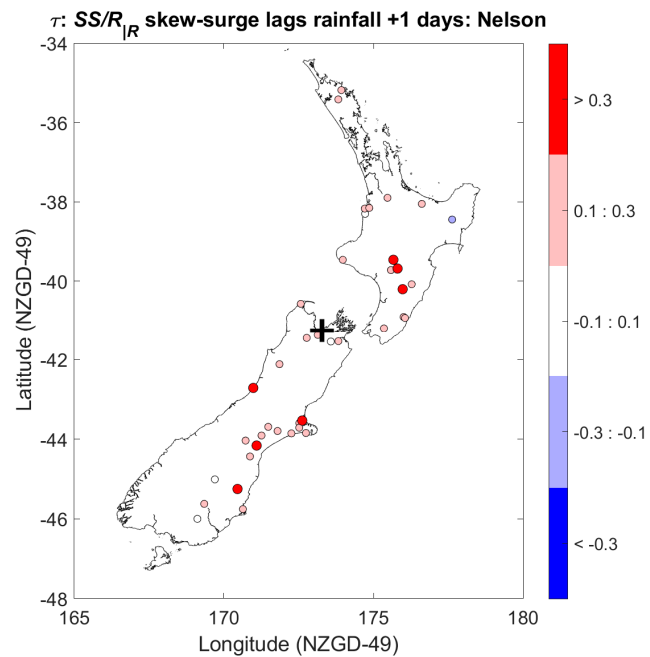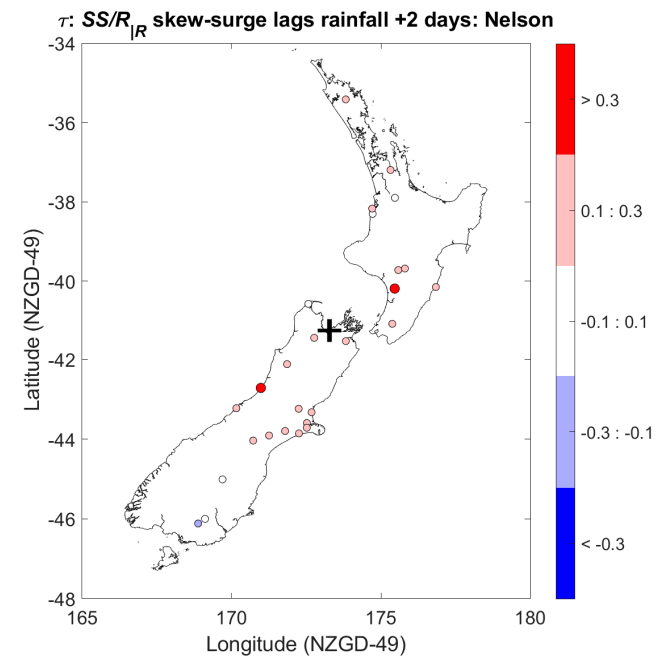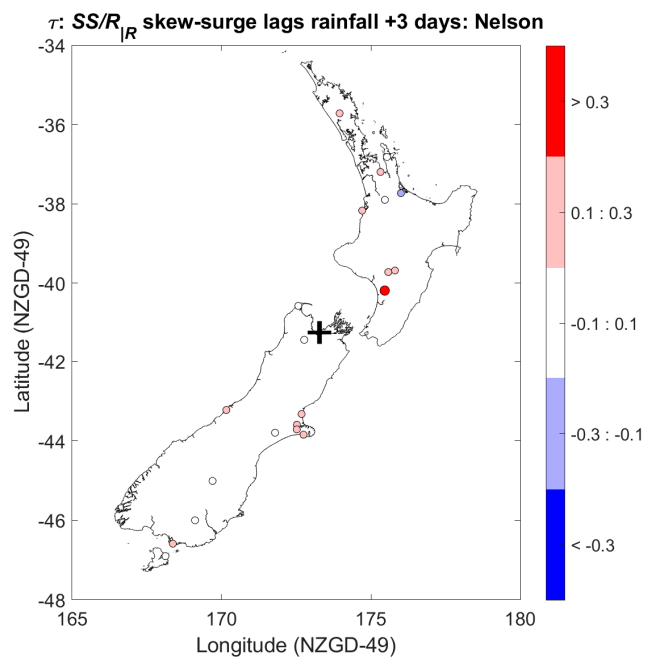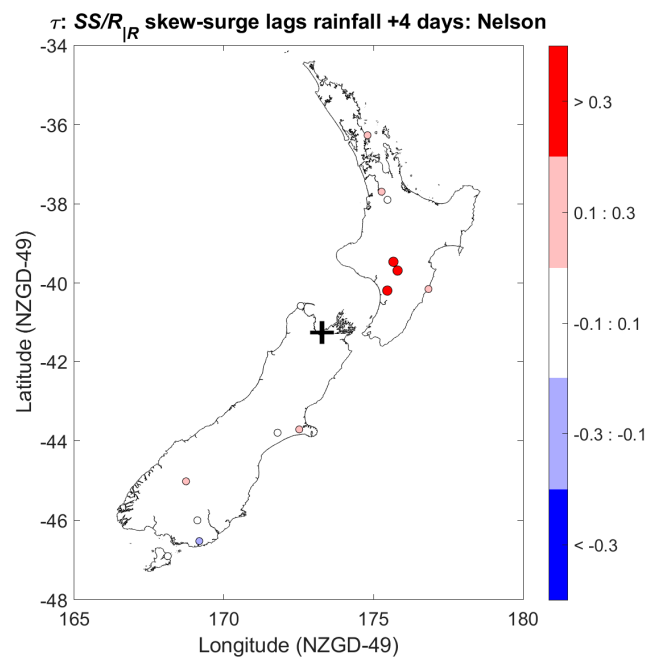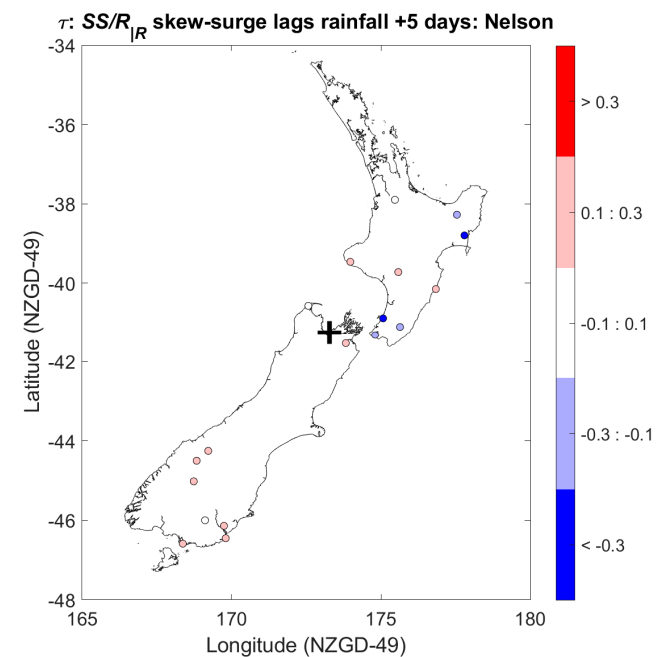

Wellington

$\tau$ :  $SS/R_{IR}$  skew-surge precedes rainfall 5 days: Wellington

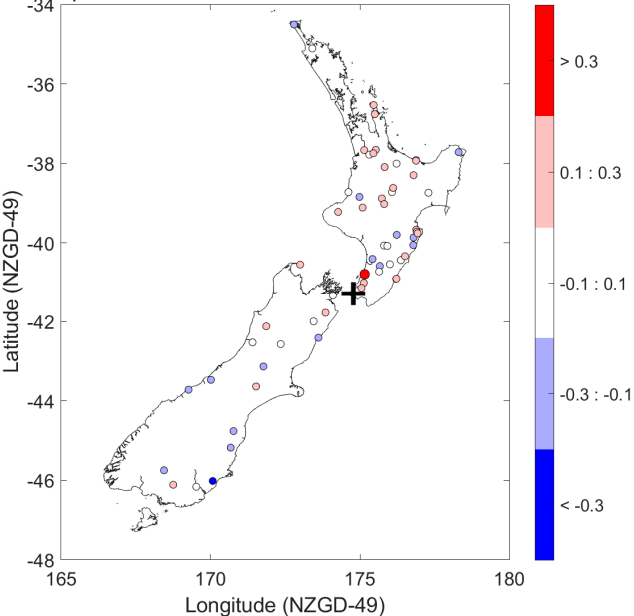

$\tau$ :  $SS/R_{IR}$  skew-surge precedes rainfall 4 days: Wellington

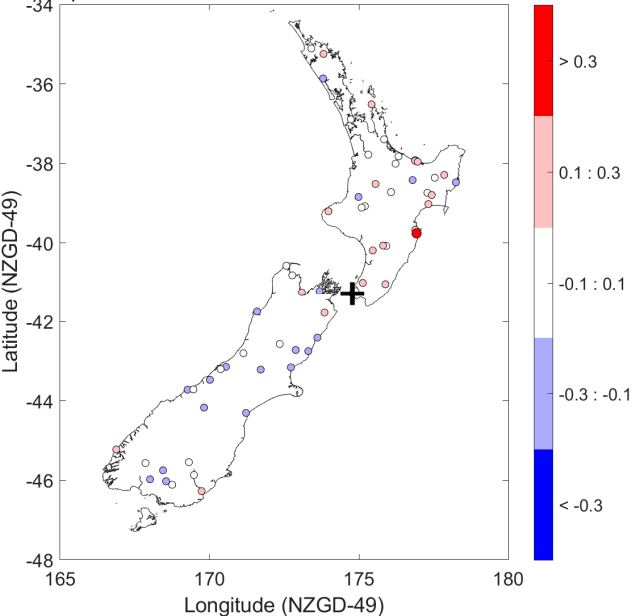

$\tau$ :  $SS/R_{IR}$  skew-surge precedes rainfall 3 days: Wellington

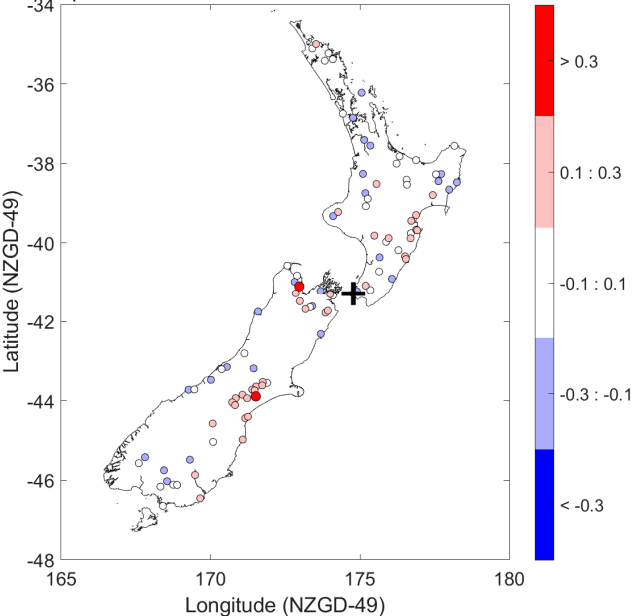

$\tau$ :  $SS/R_{IR}$  skew-surge precedes rainfall 2 days: Wellington

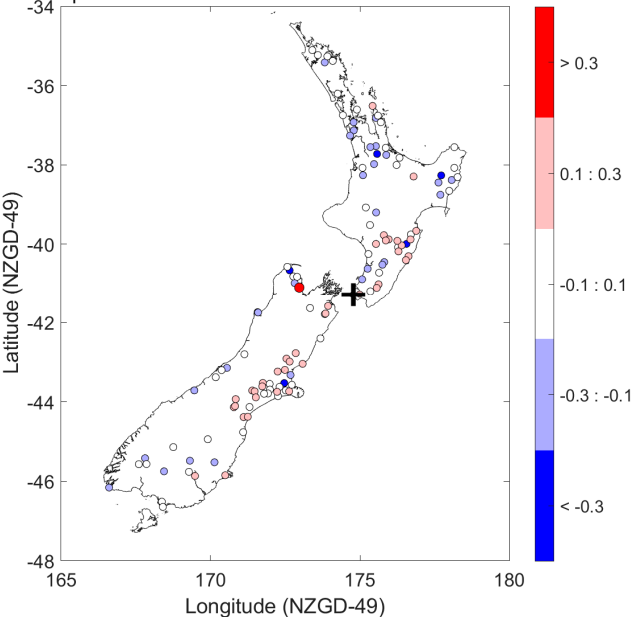

$\tau$ :  $SS/R_{IR}$  skew-surge precedes rainfall 1 days: Wellington

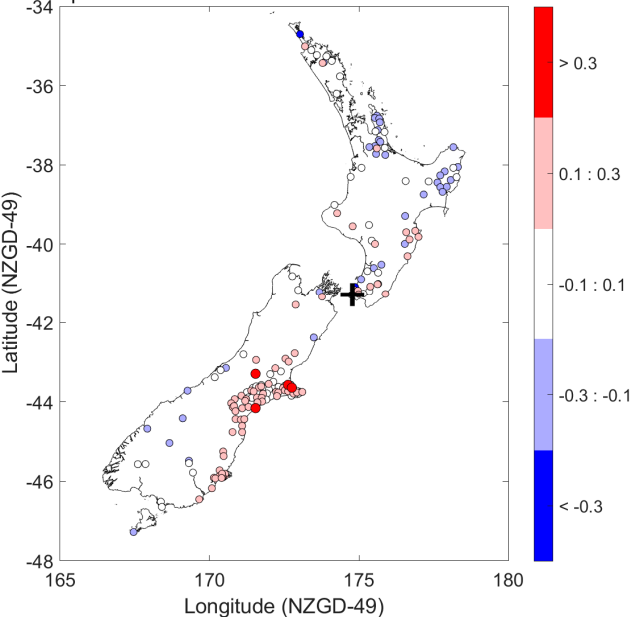

$\tau$ :  $SS/R_{IR}$  peak skew-surge same day as rainfall: Wellington

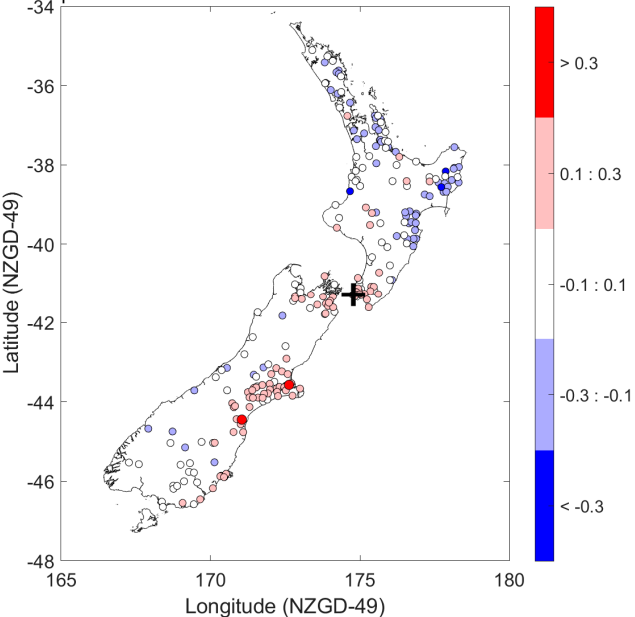

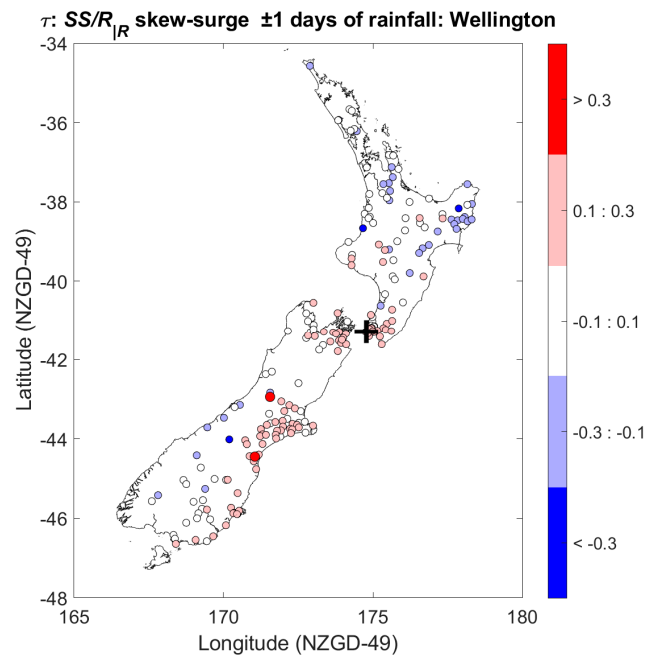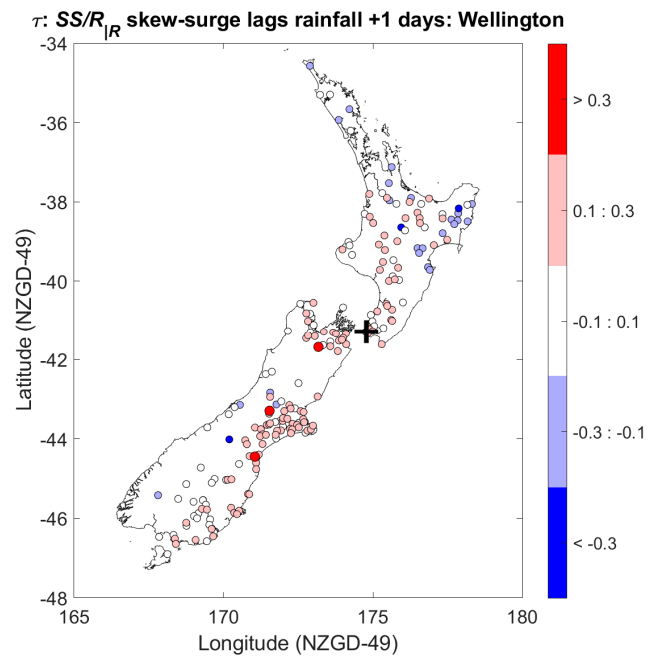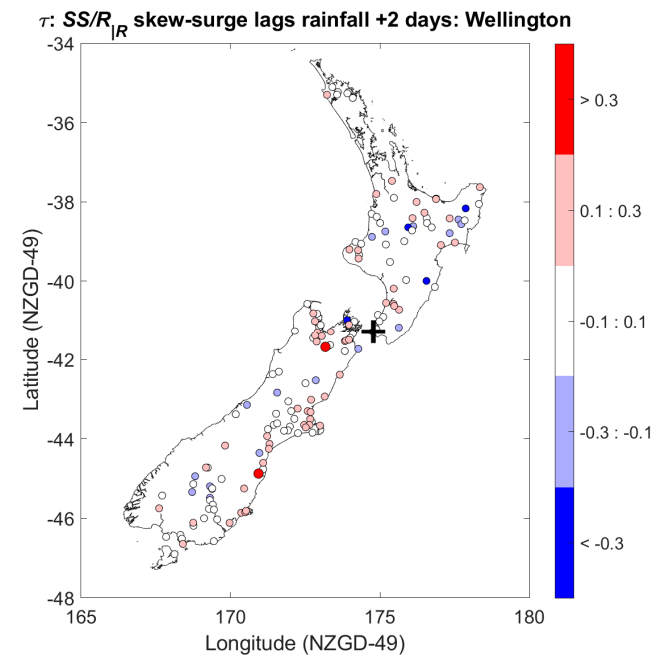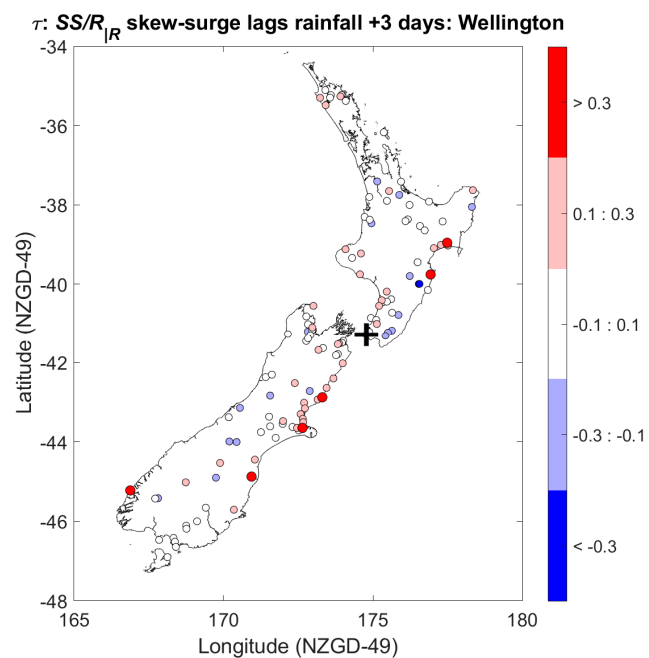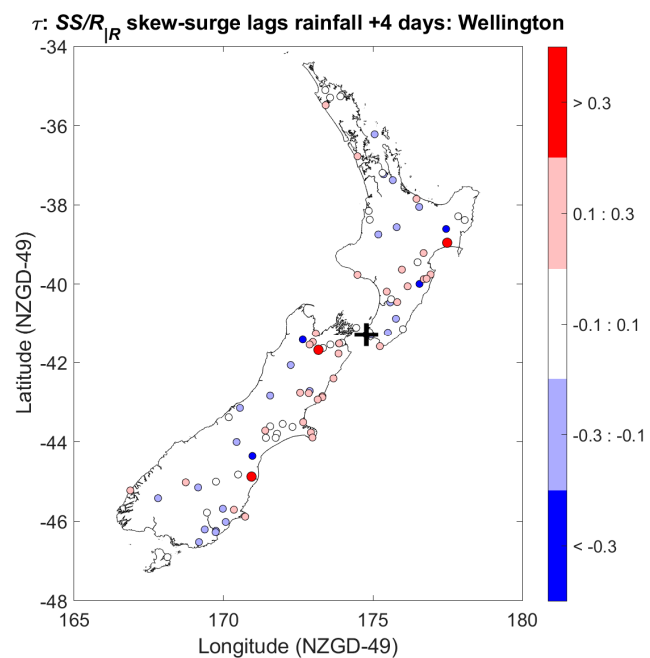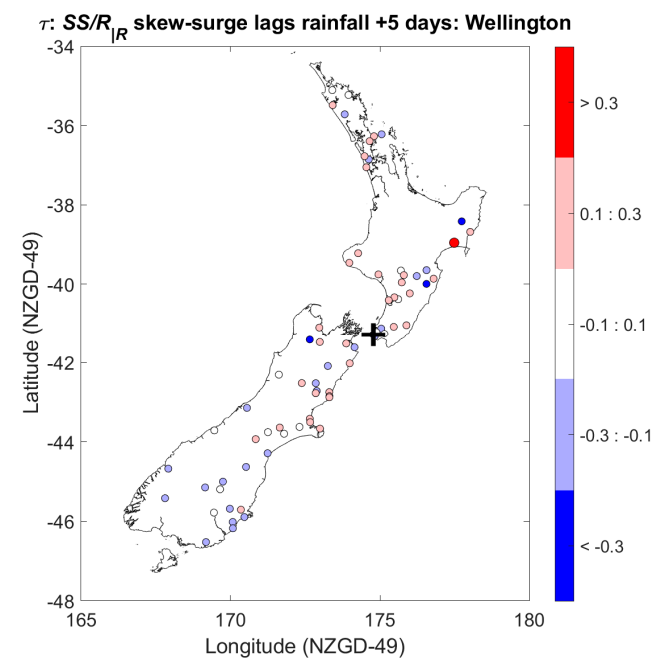

## Jackson Bay

$\tau: SS/R_{IR}$  skew-surge precedes rainfall 5 days: JacksonBay

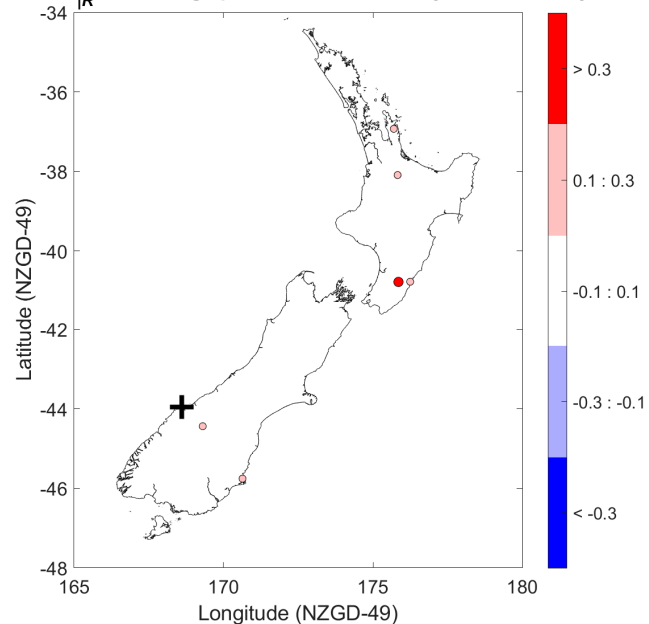

$\tau: SS/R_{IR}$  skew-surge precedes rainfall 4 days: JacksonBay

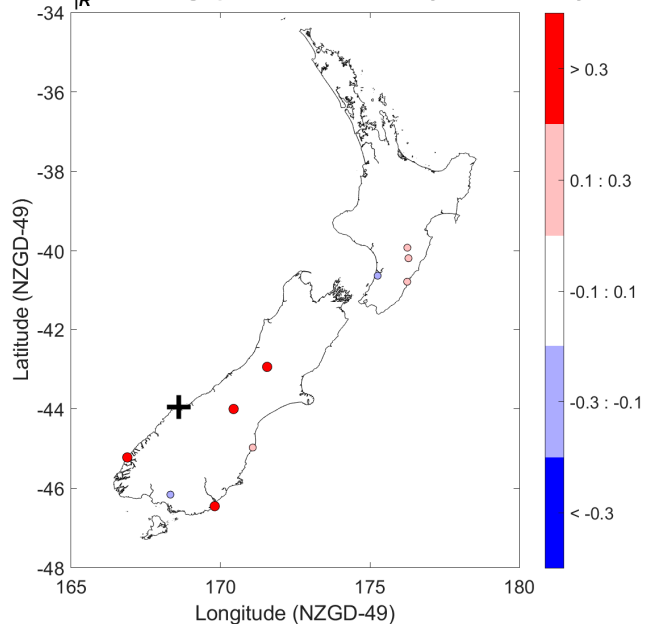

$\tau: SS/R_{IR}$  skew-surge precedes rainfall 3 days: JacksonBay

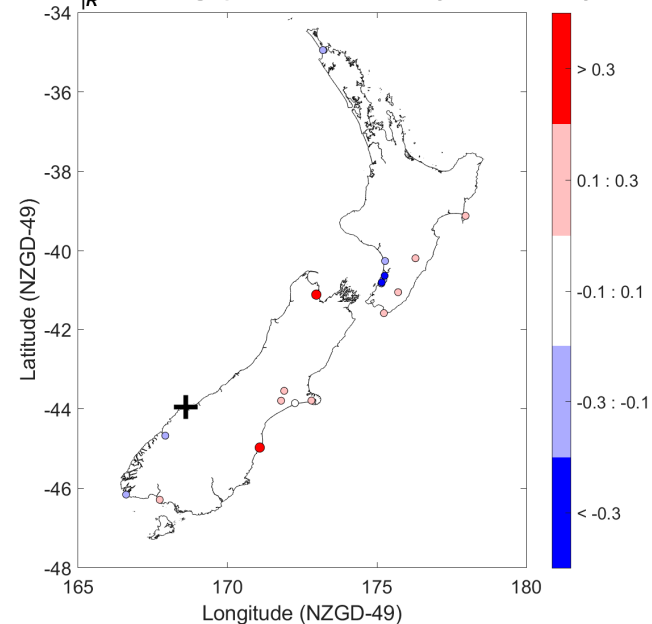

$\tau: SS/R_{IR}$  skew-surge precedes rainfall 2 days: JacksonBay

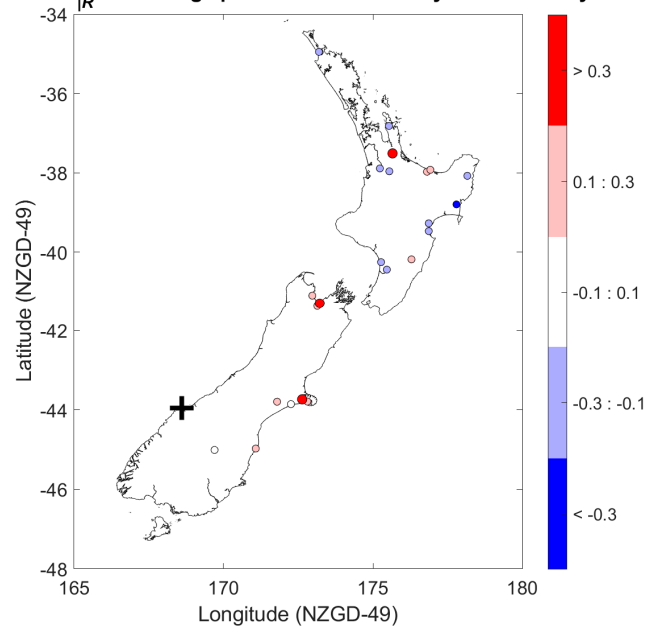

$\tau: SS/R_{IR}$  skew-surge precedes rainfall 1 days: JacksonBay

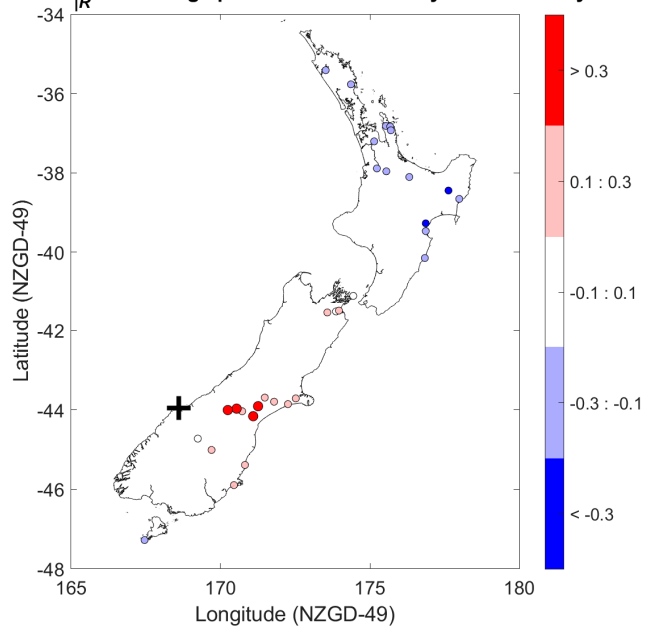

$\tau: SS/R_{IR}$  peak skew-surge same day as rainfall: JacksonBay

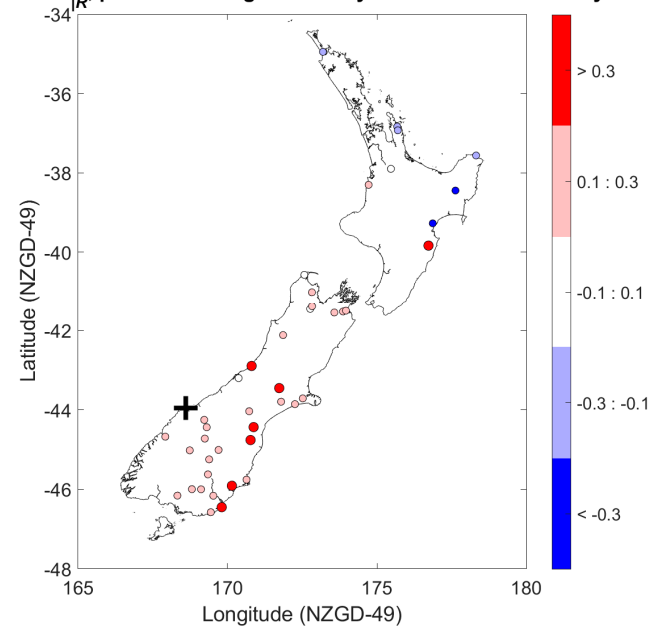

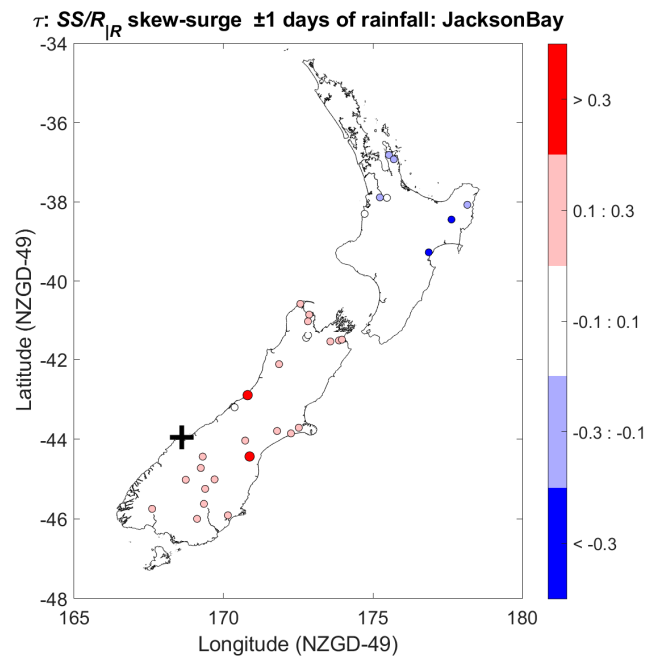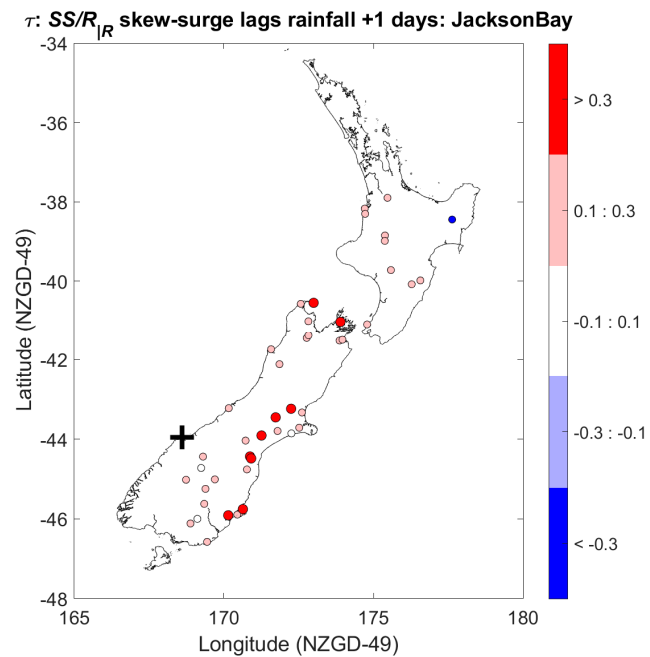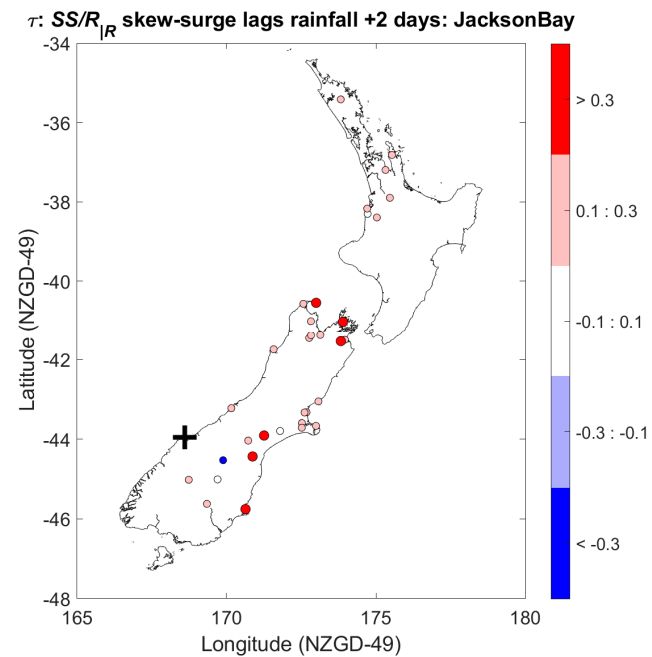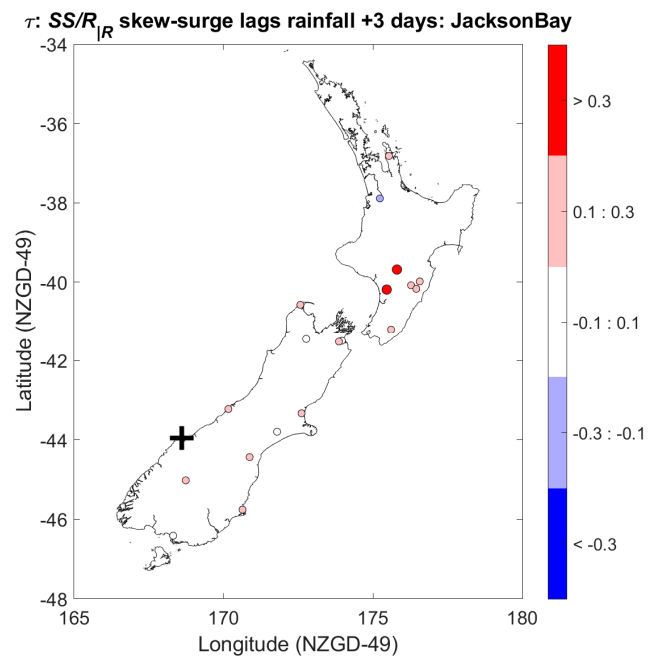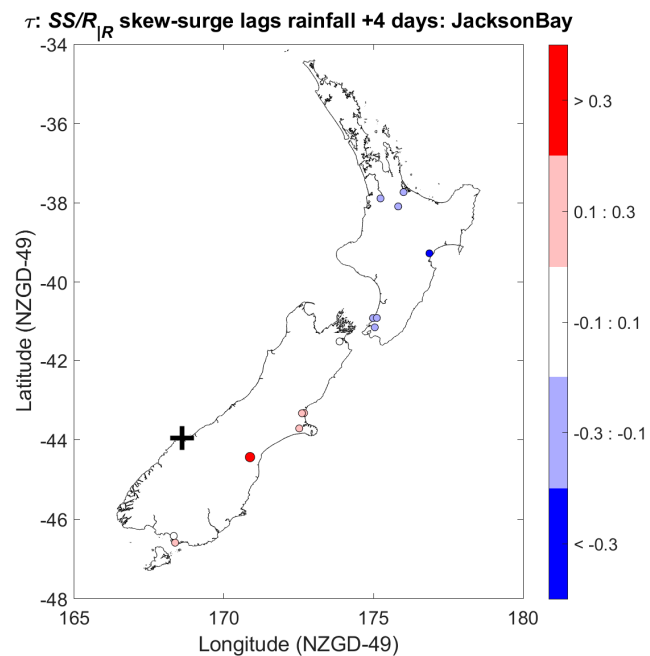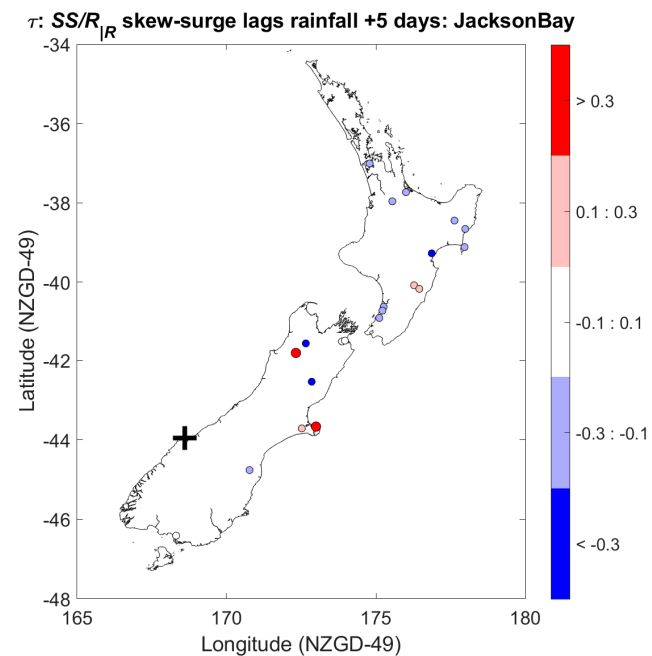



Lyttelton

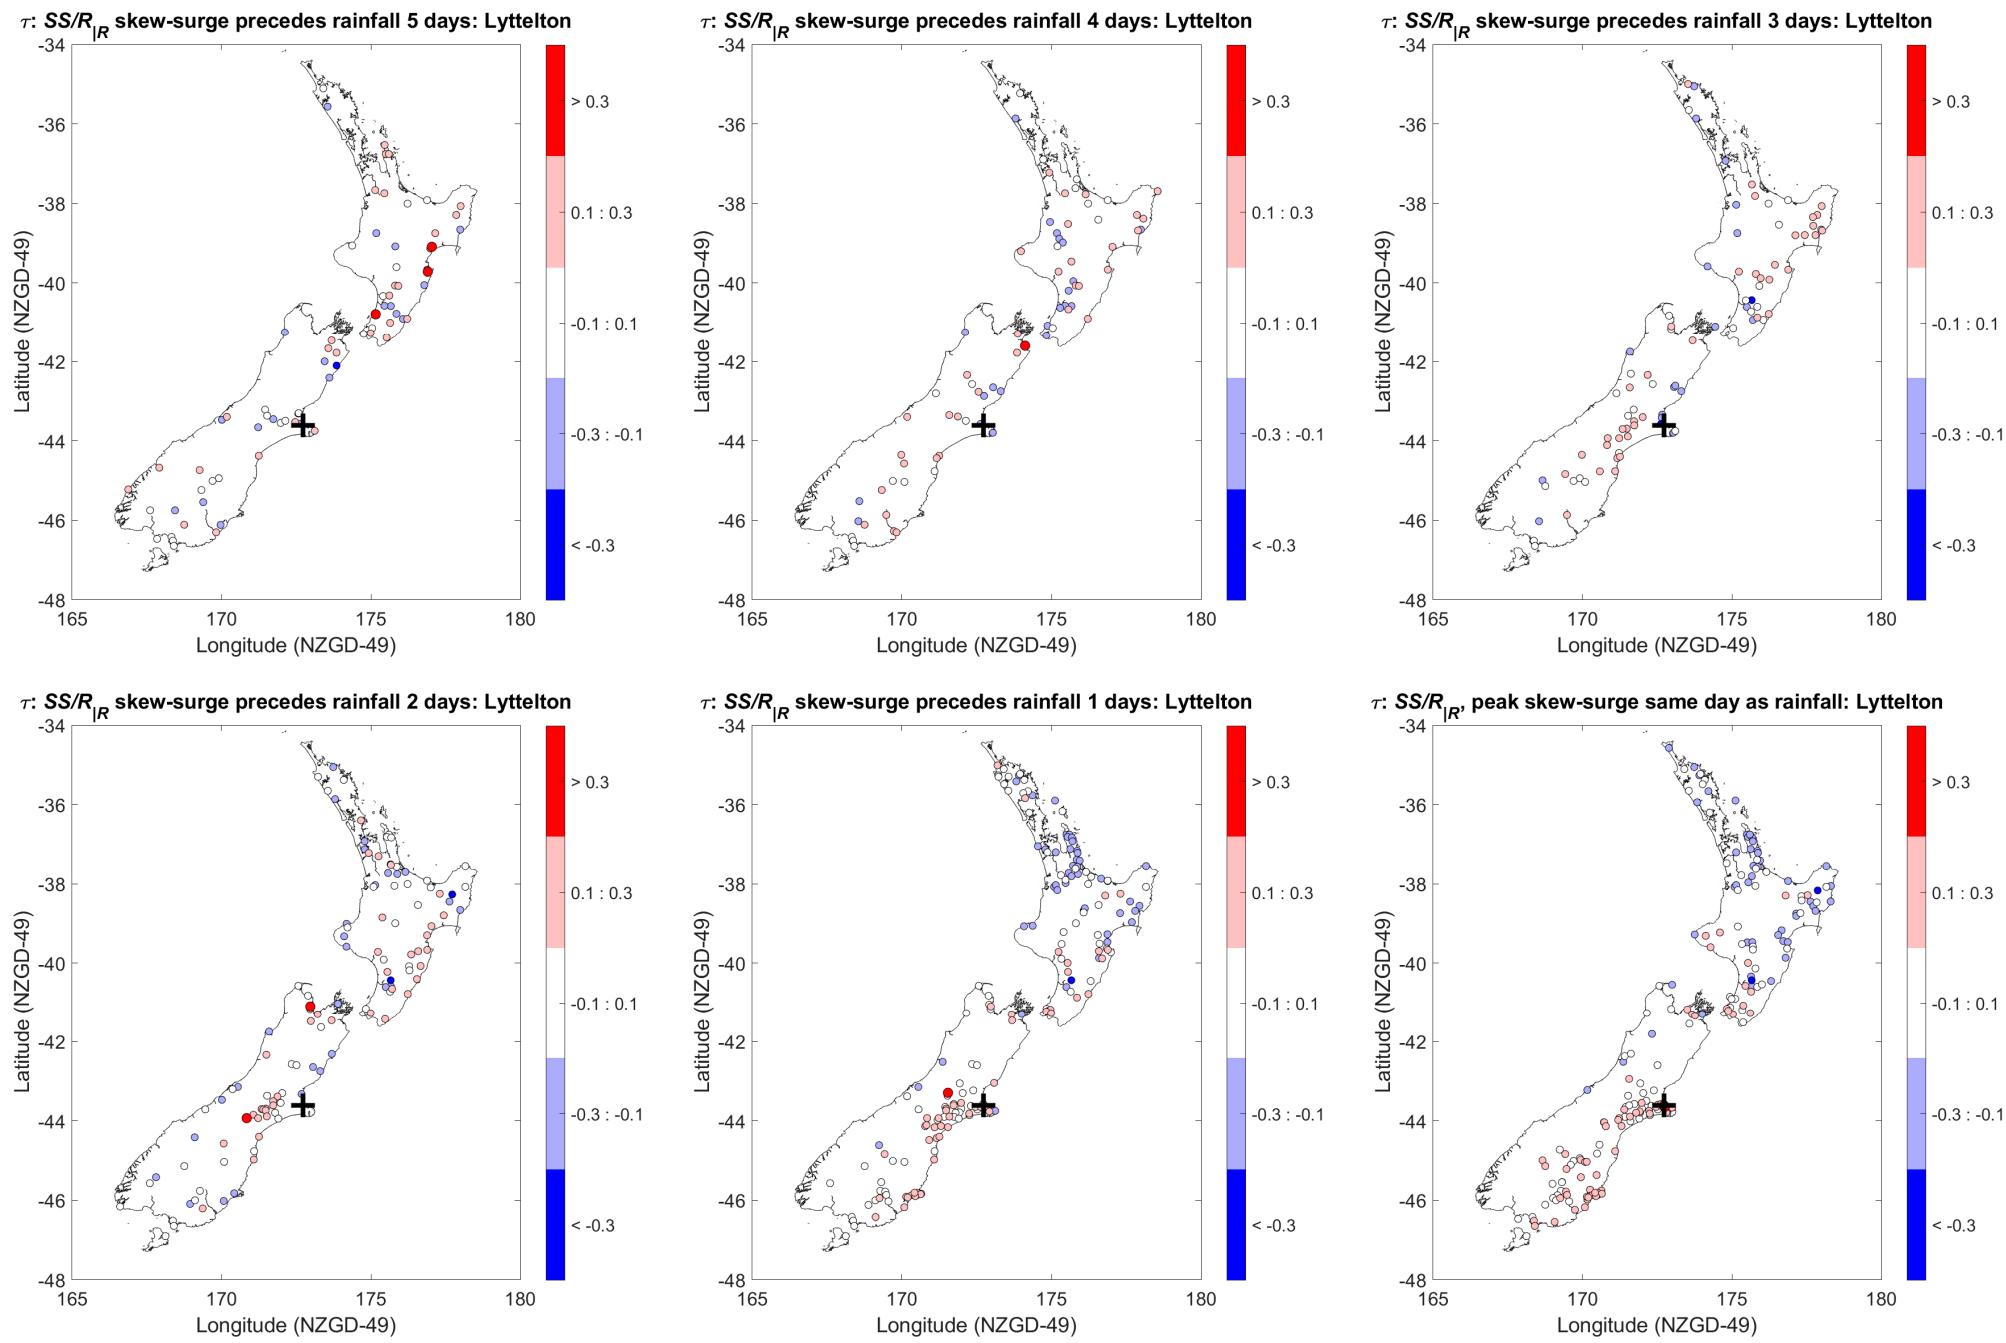

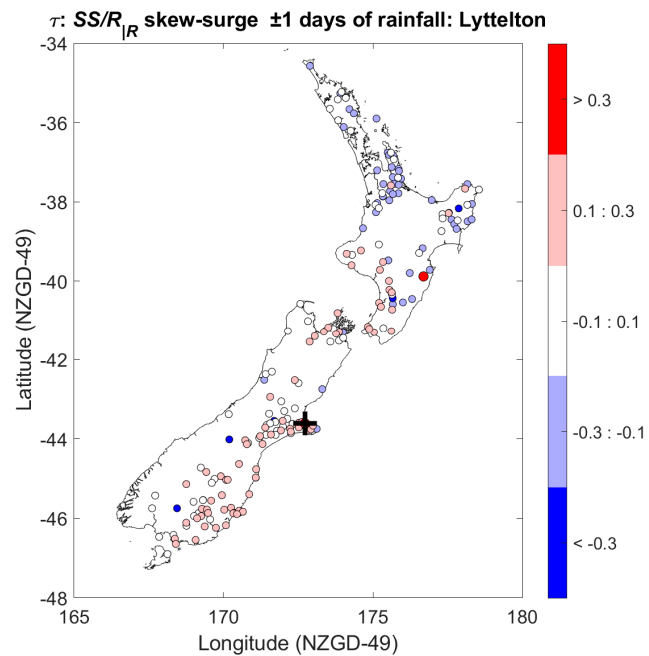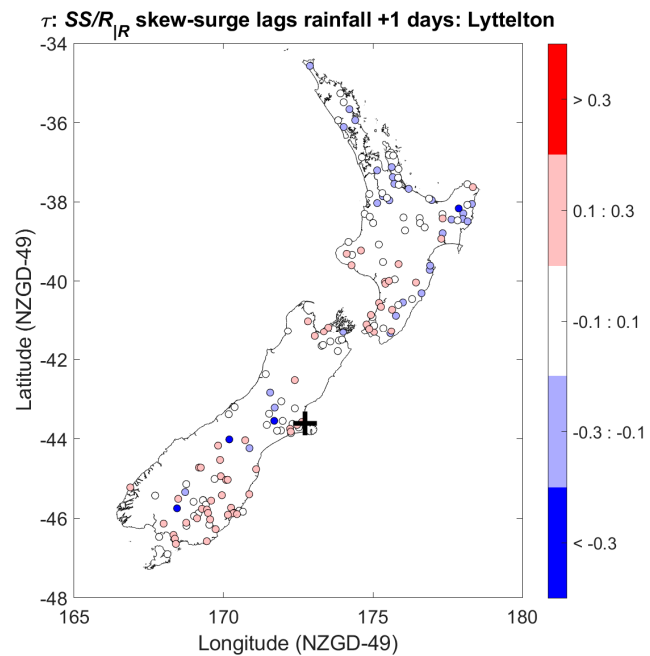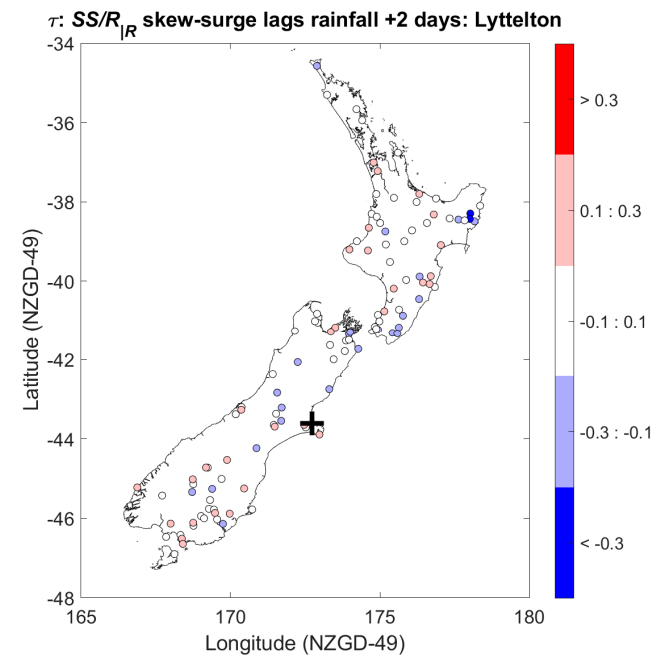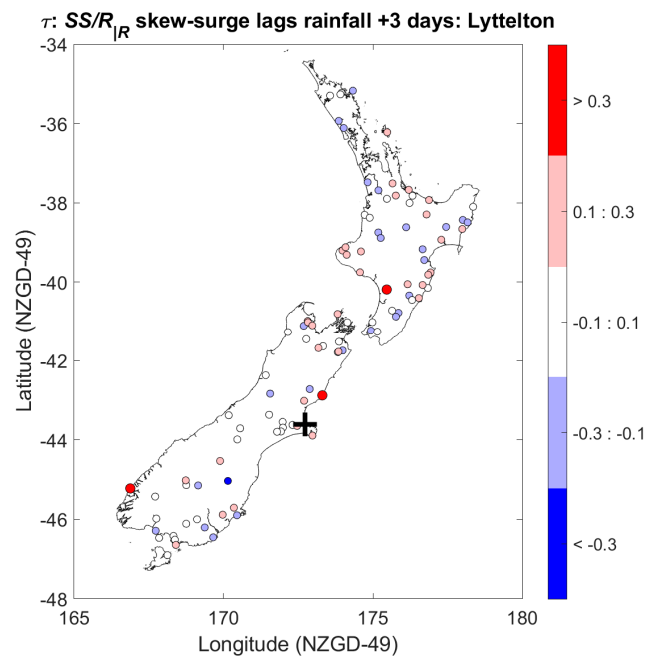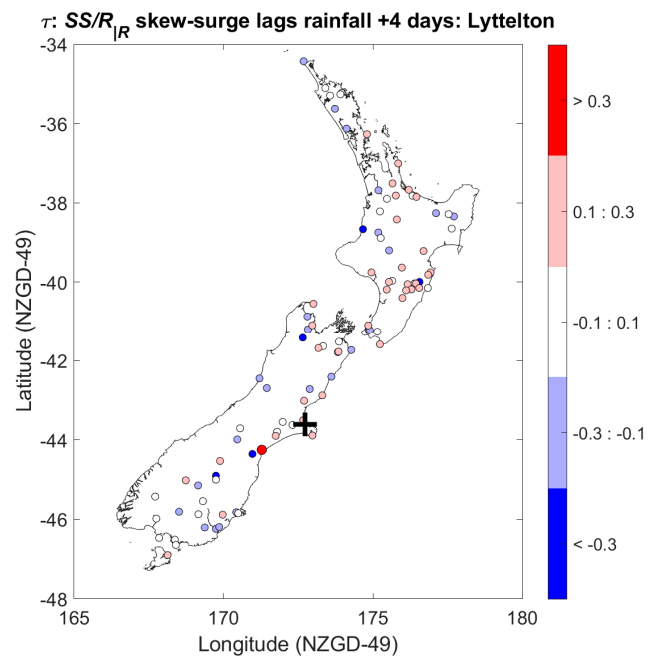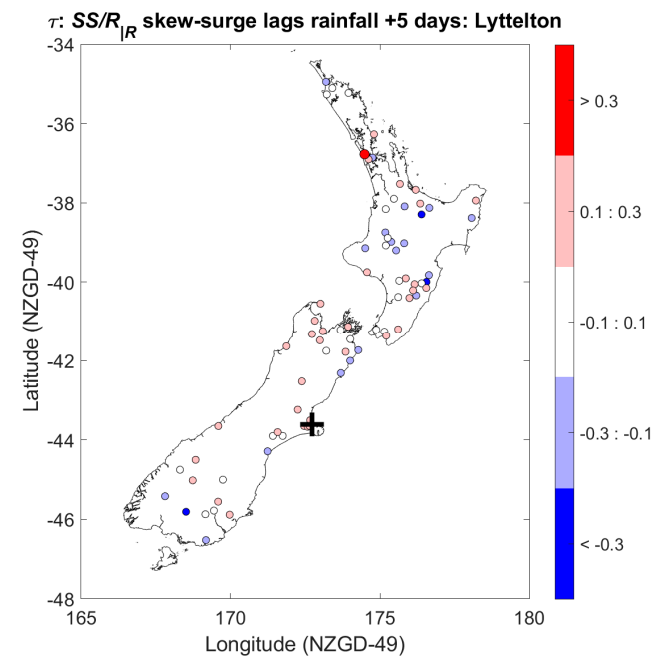

Dunedin

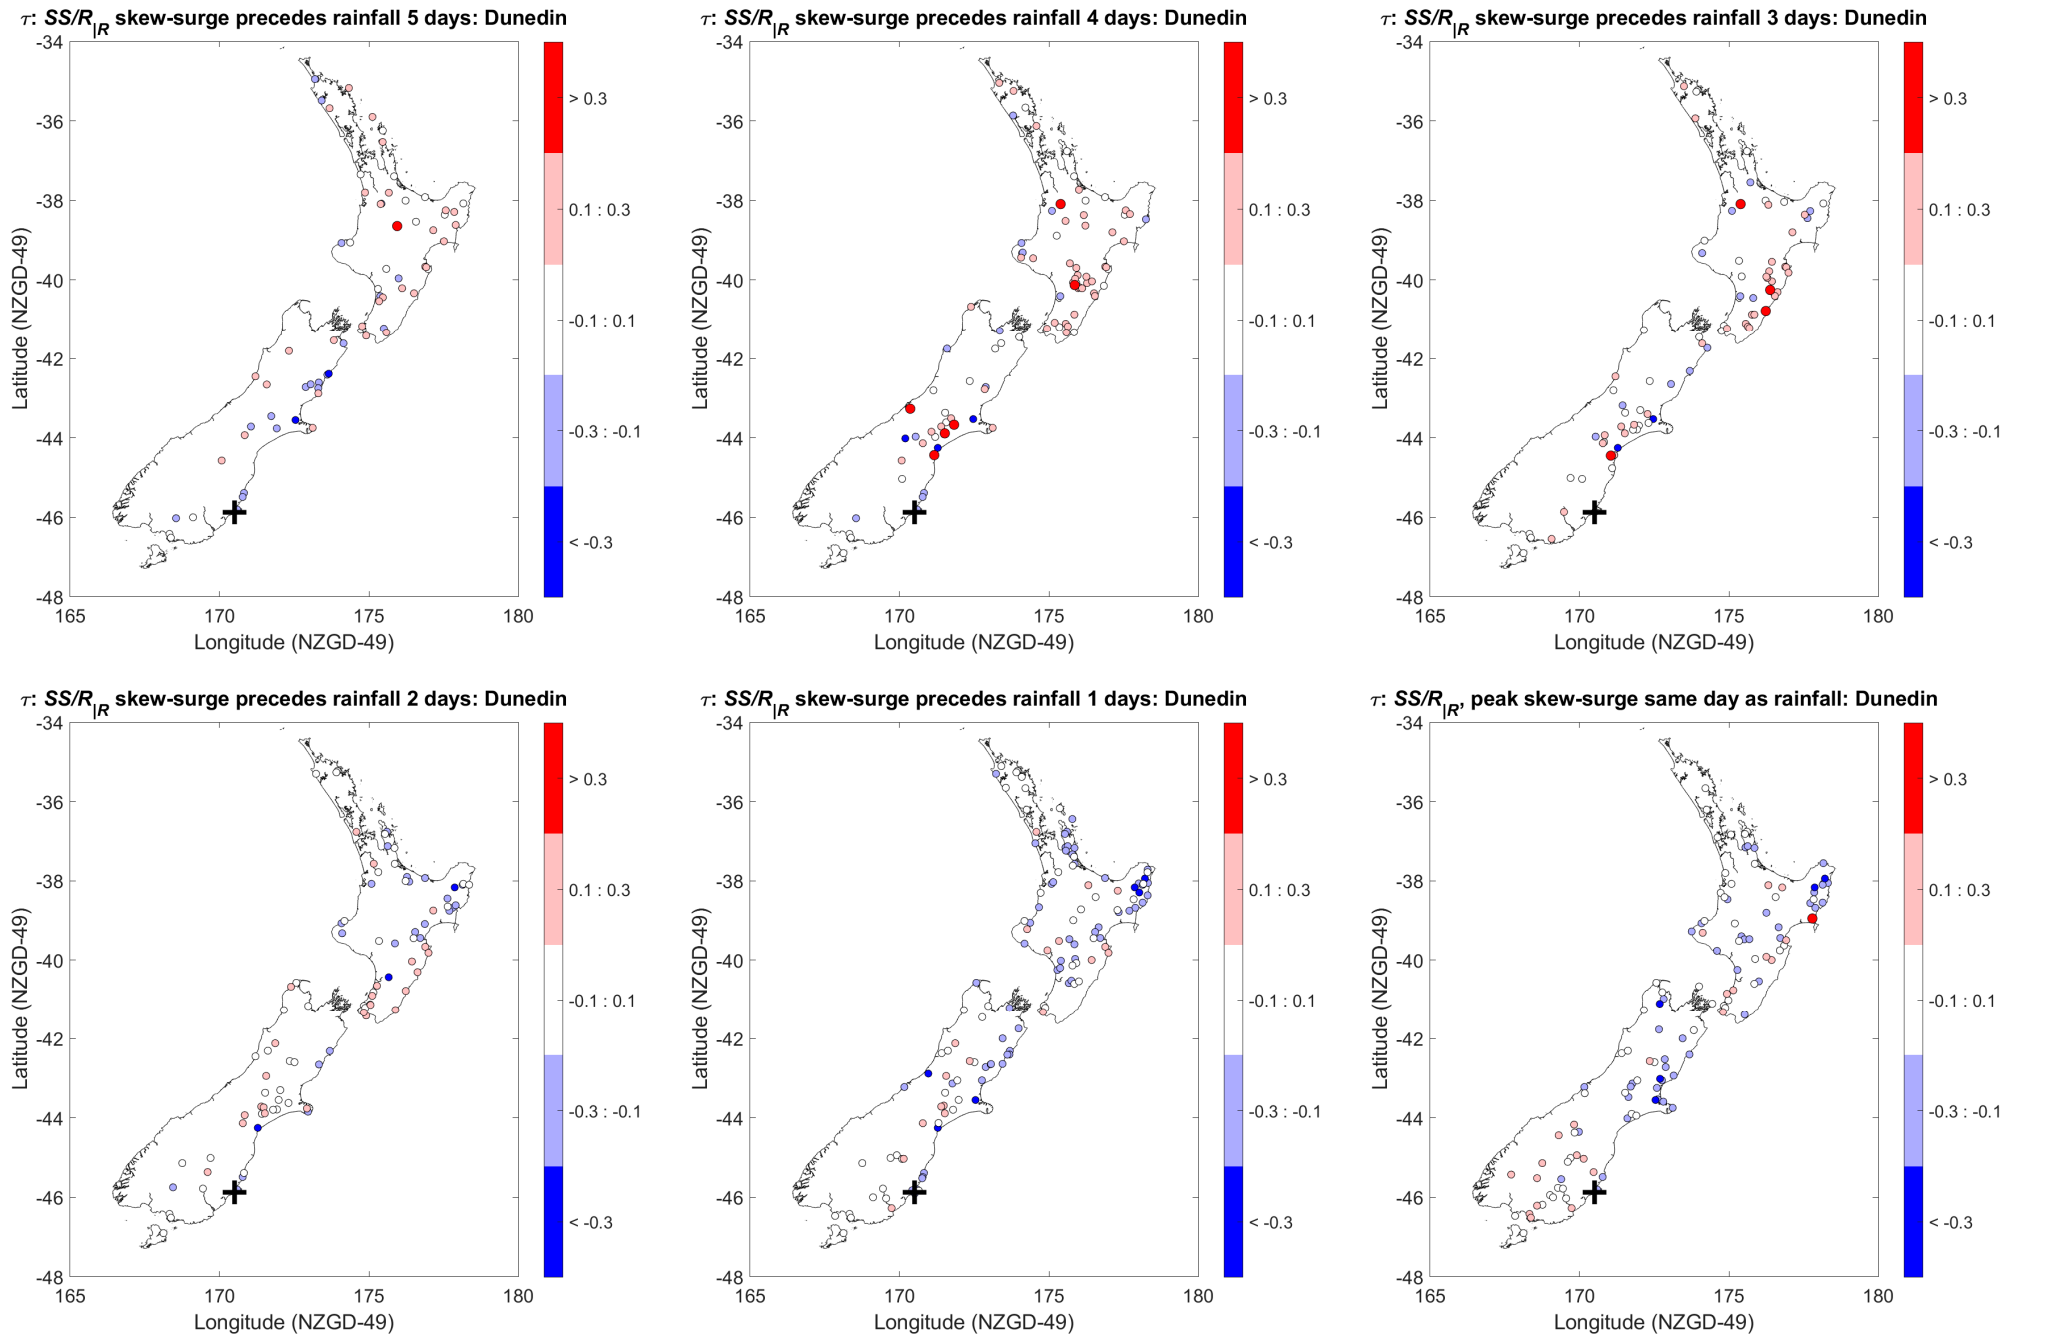

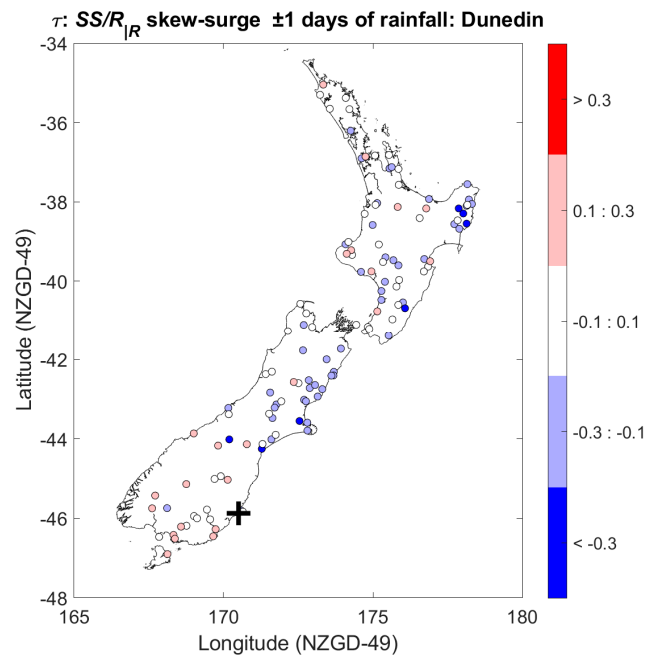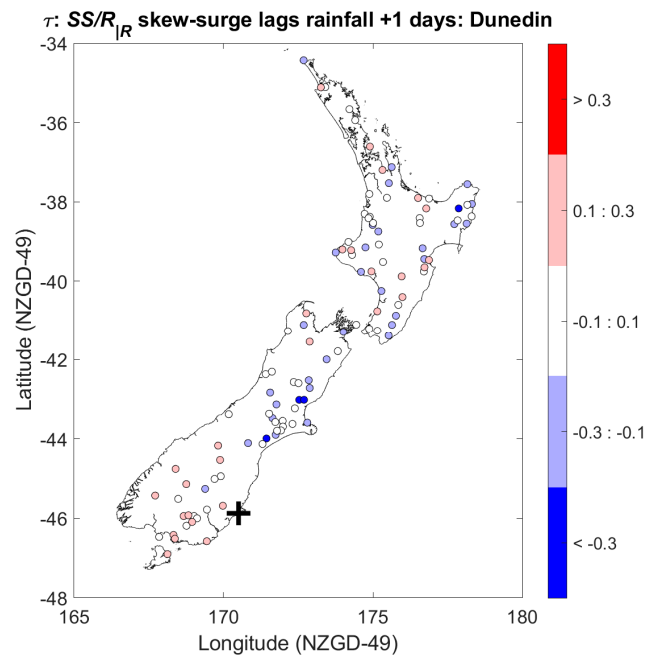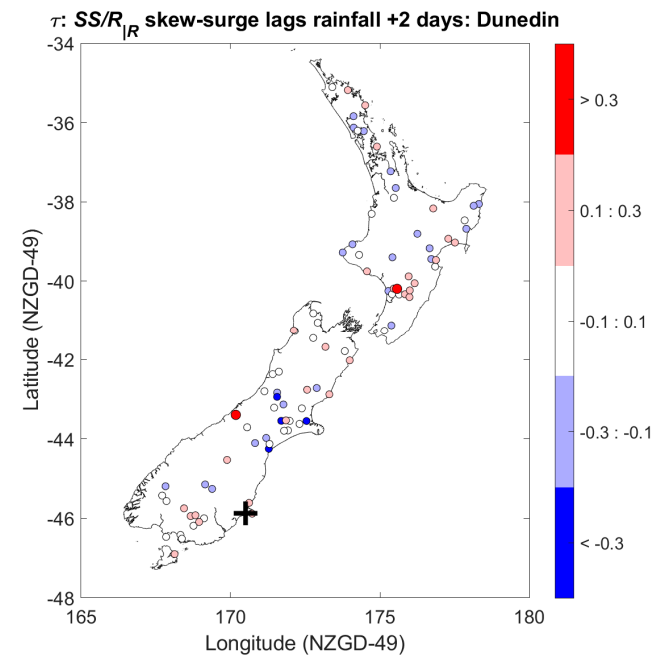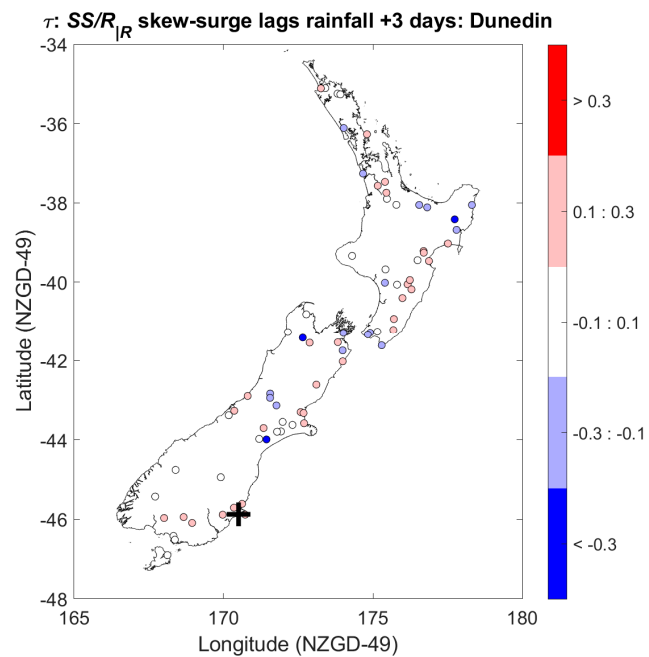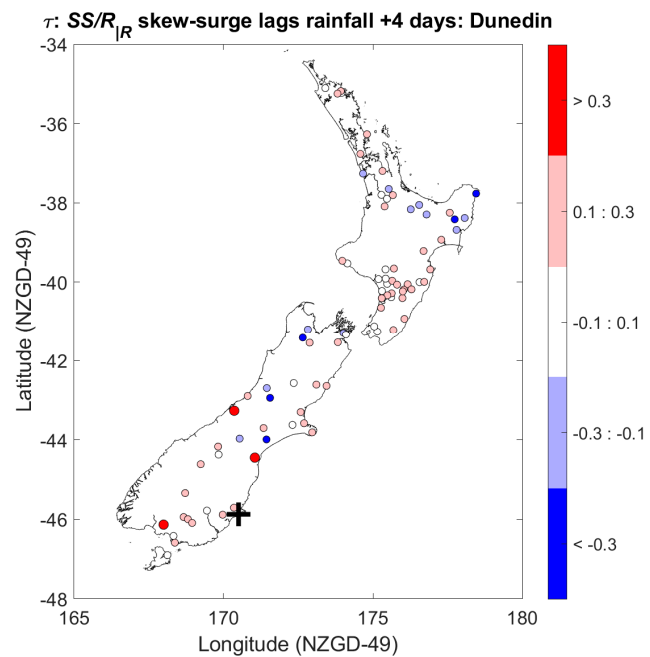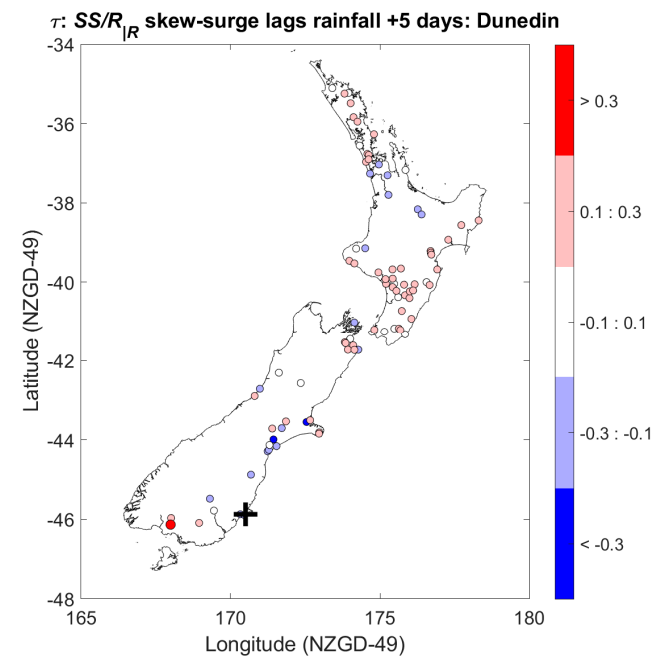

Dog Island

$\tau$ :  $SS/R_{IR}$  skew-surge precedes rainfall 5 days: DogIsland

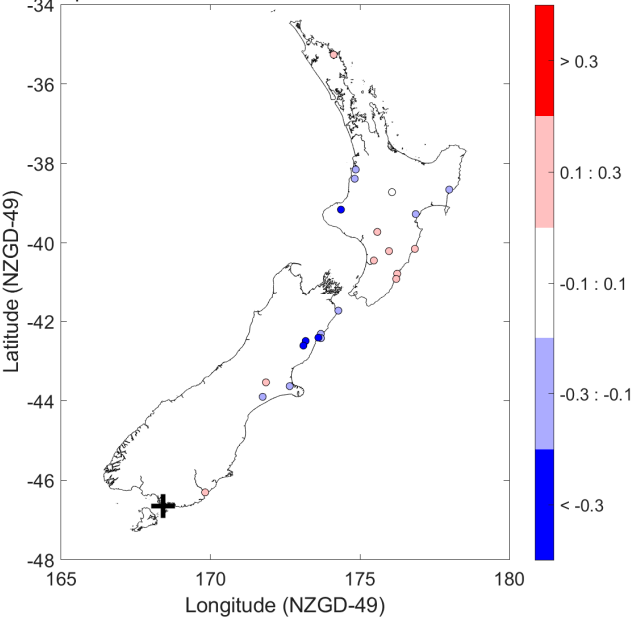

$\tau$ :  $SS/R_{IR}$  skew-surge precedes rainfall 4 days: DogIsland

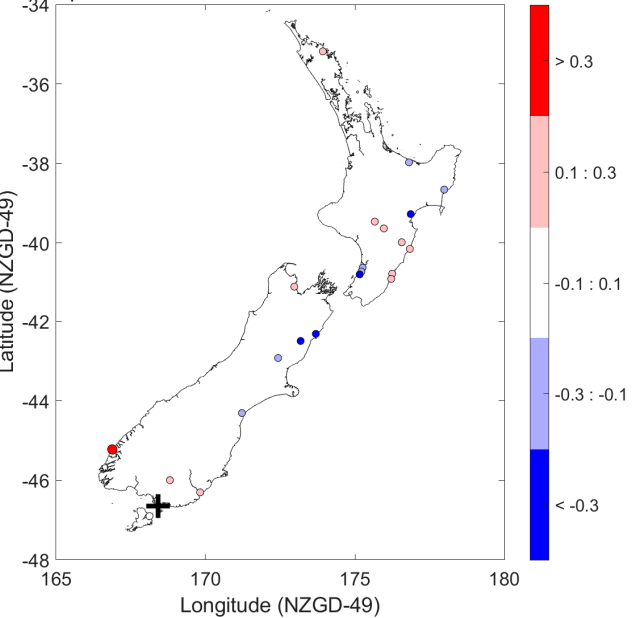

$\tau$ :  $SS/R_{IR}$  skew-surge precedes rainfall 3 days: DogIsland

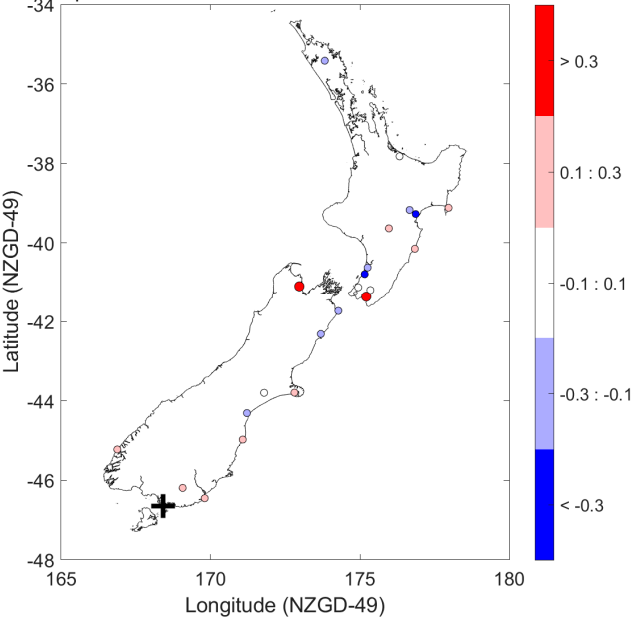

$\tau$ :  $SS/R_{IR}$  skew-surge precedes rainfall 2 days: DogIsland

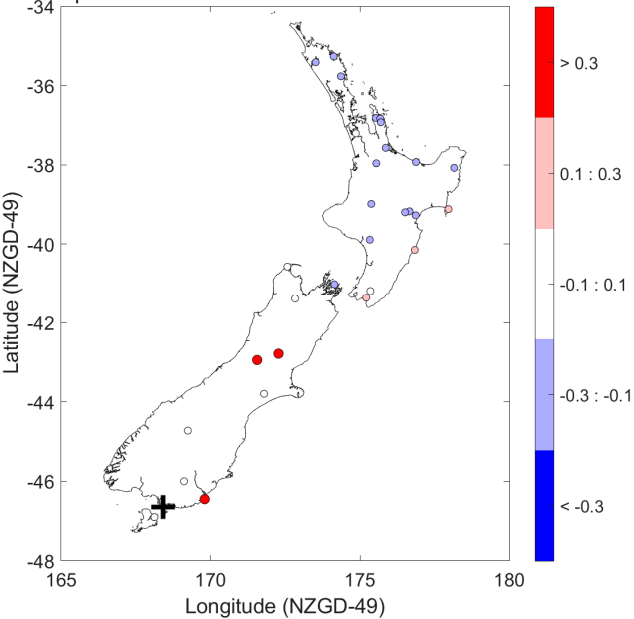

$\tau$ :  $SS/R_{IR}$  skew-surge precedes rainfall 1 days: DogIsland

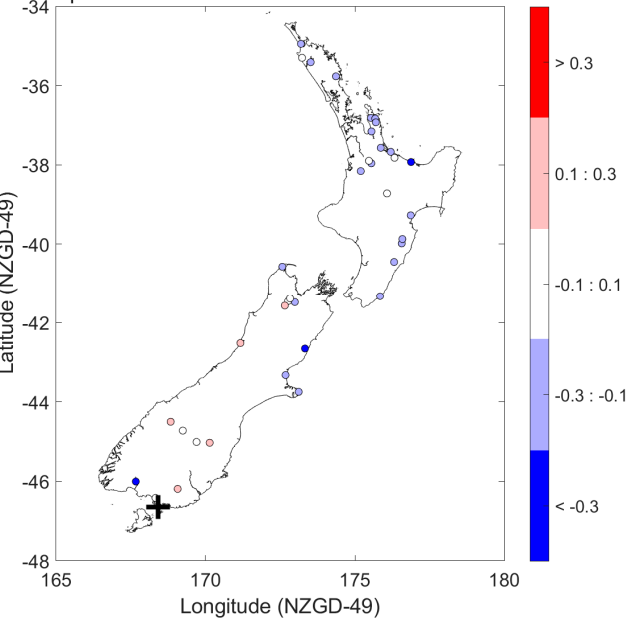

$\tau$ :  $SS/R_{IR}$  peak skew-surge same day as rainfall: DogIsland

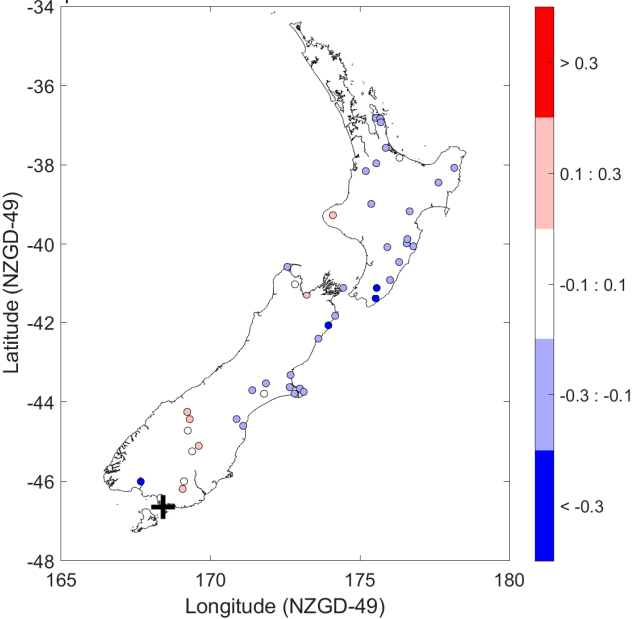

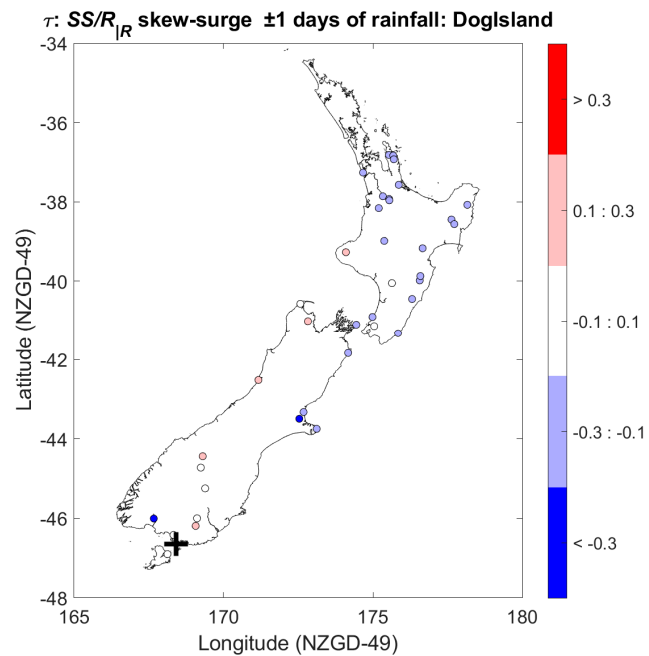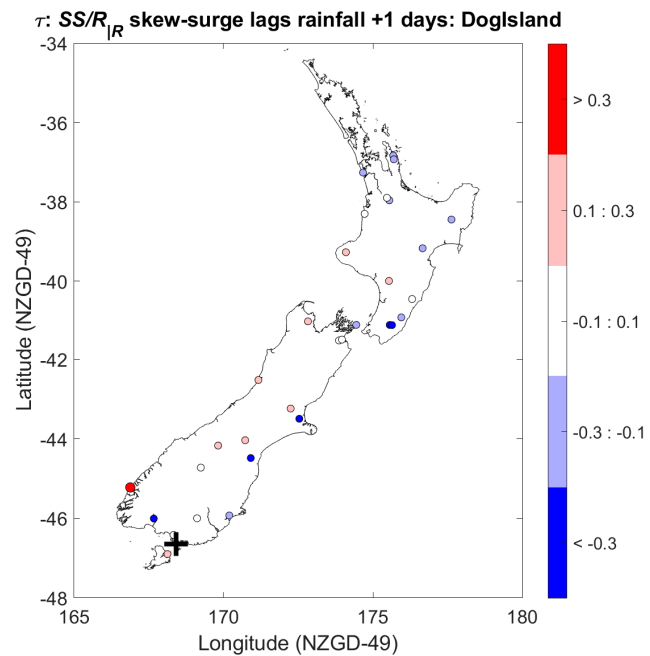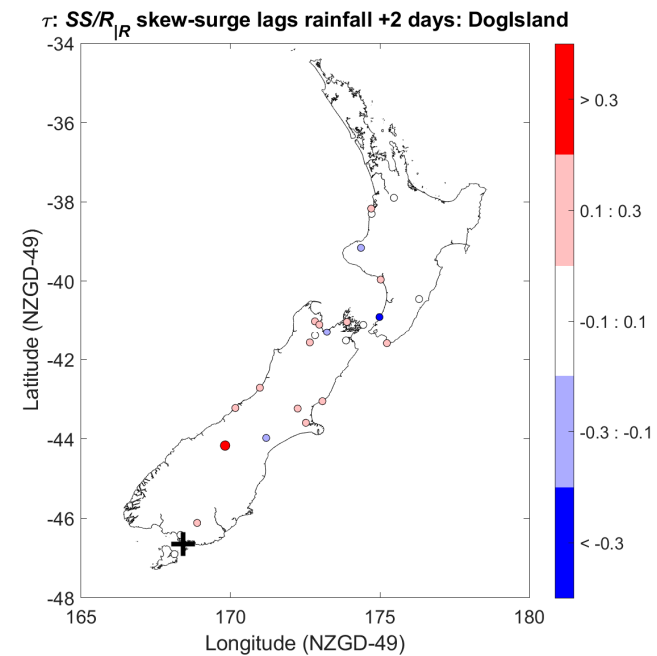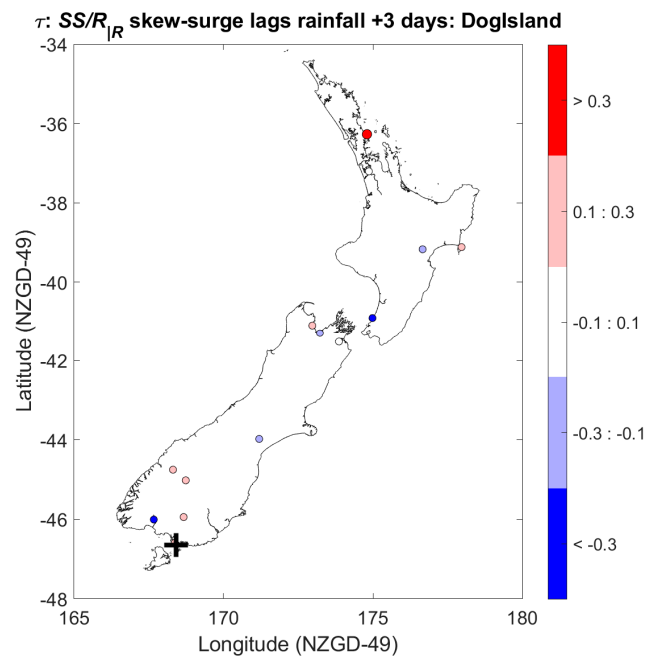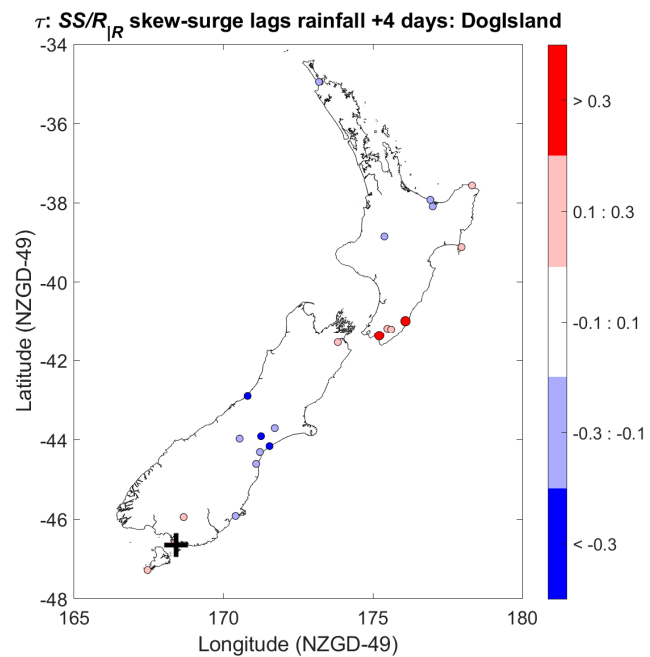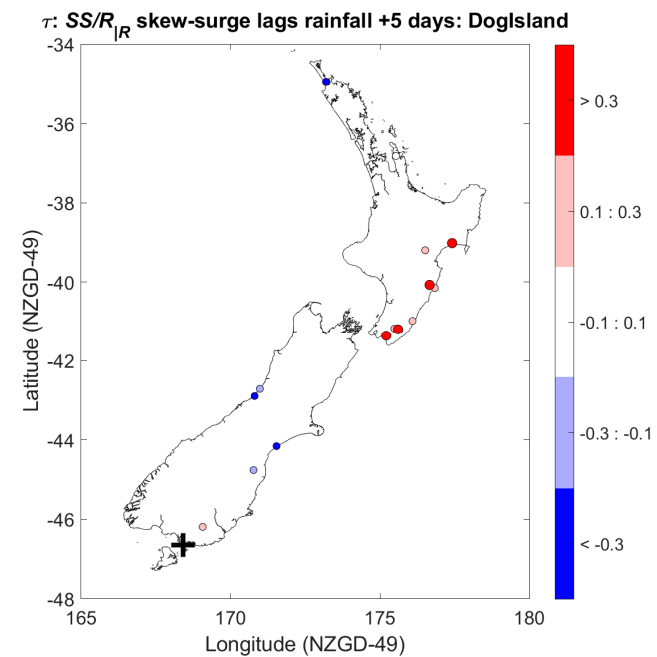

## Skew-surge and river-flow

The following plots show Kendall's rank correlation coefficient  $\tau$ , significant at  $p$ -value  $< 0.05$ , for skew-surge and river-flow.

### $SS/F_{|SS}$ —river-flow dependent on skew-surge being extreme

Negative lags mean that the river-flow was experienced before the skew-surge and *vice versa*.

Opua

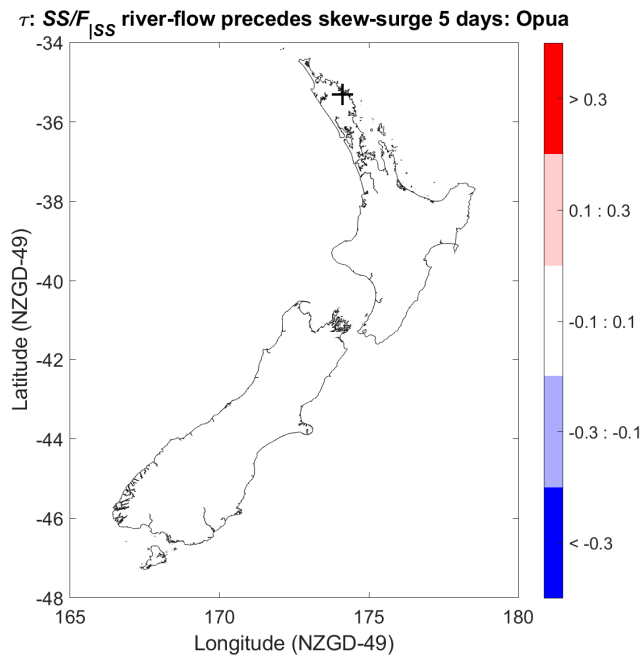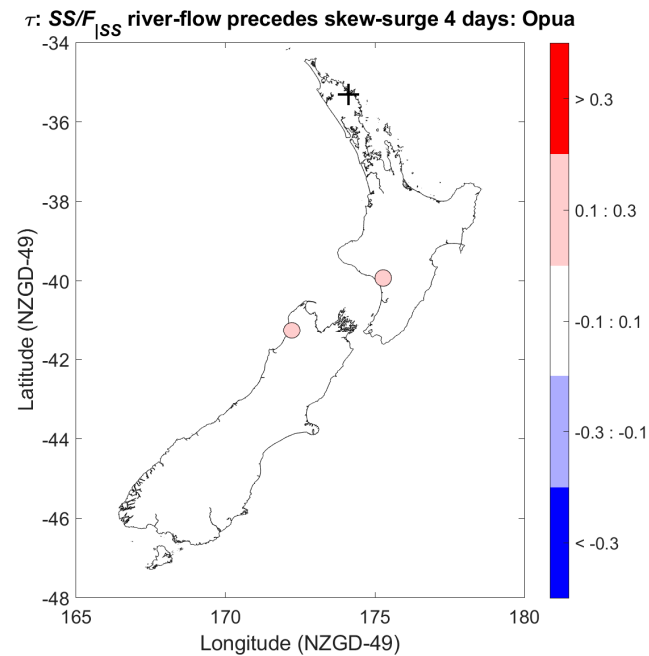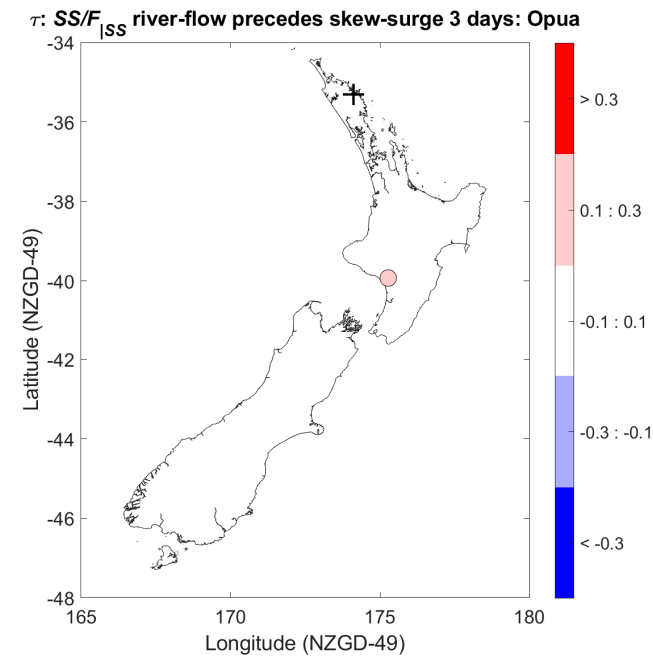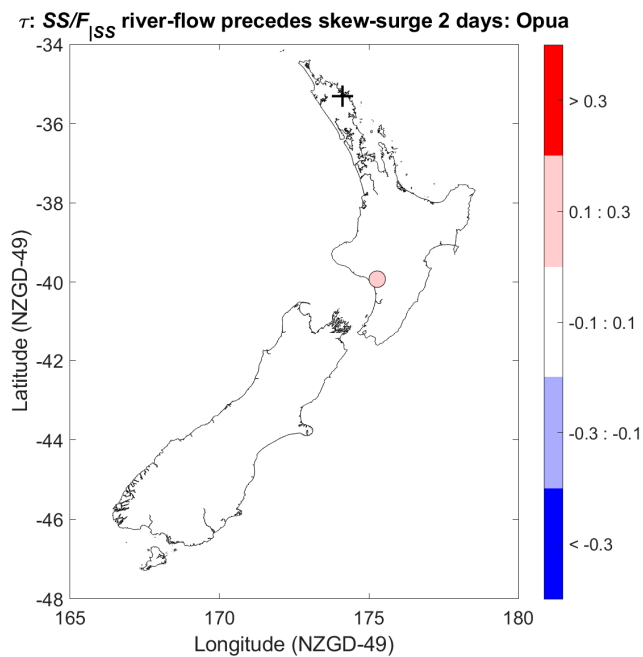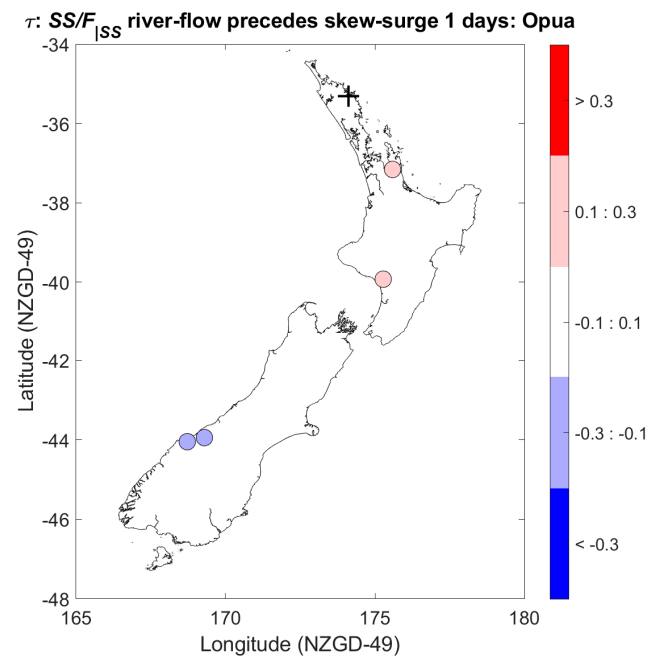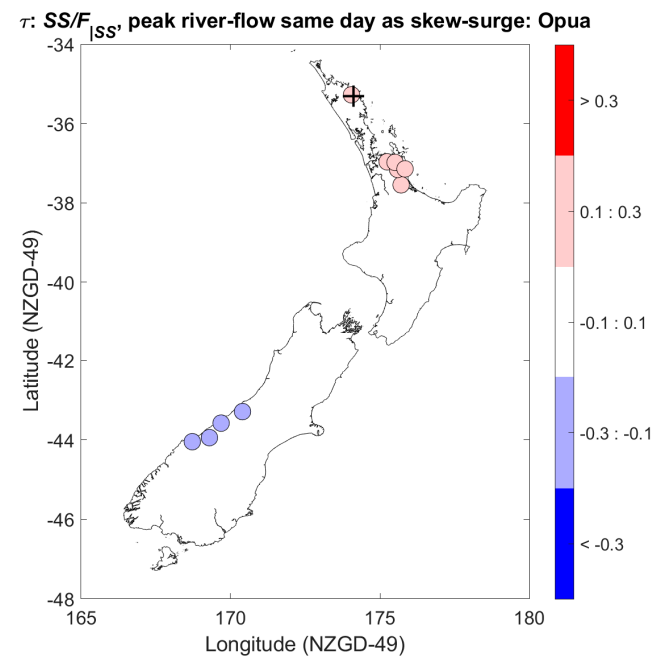



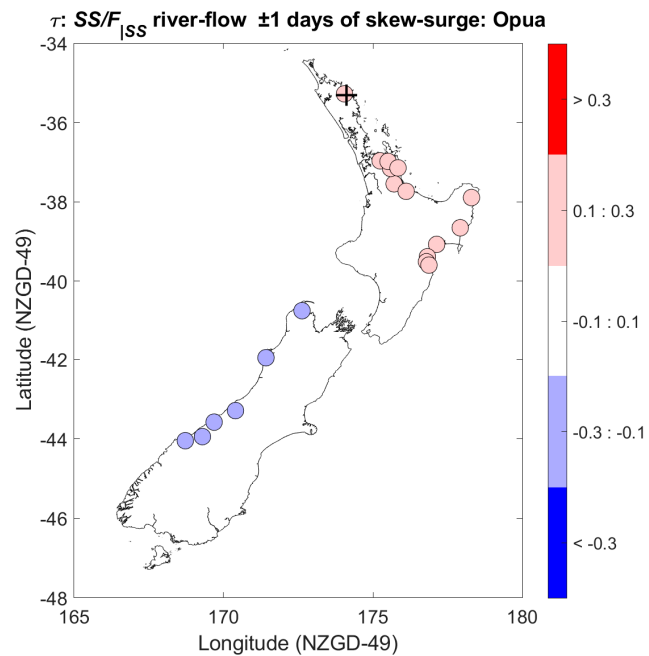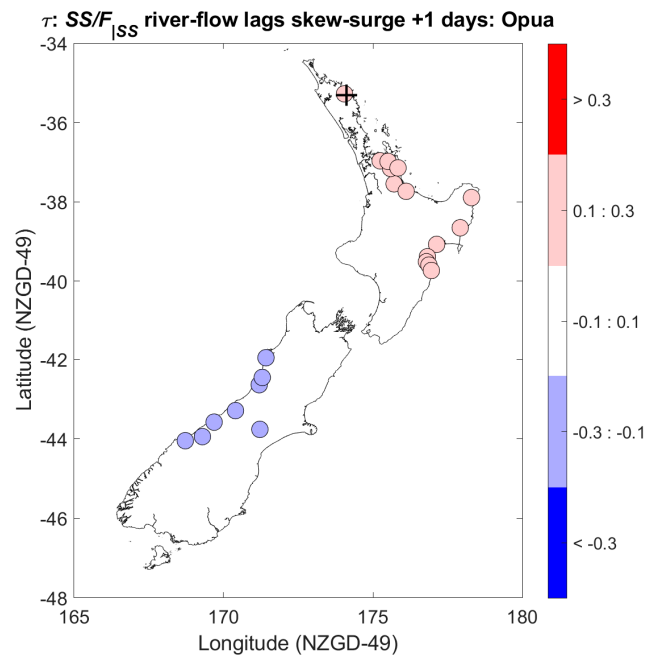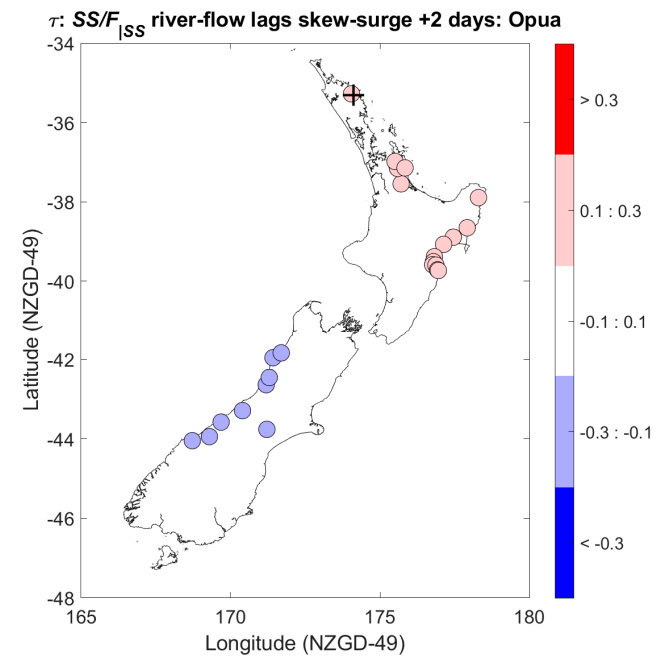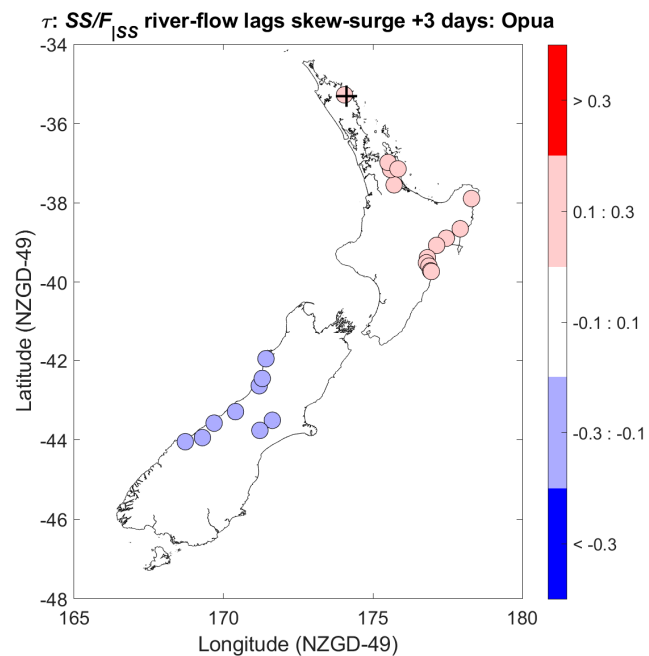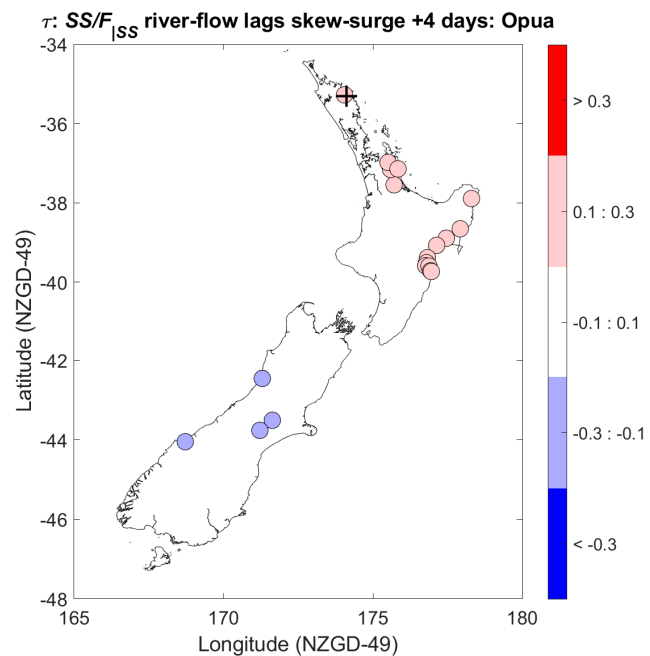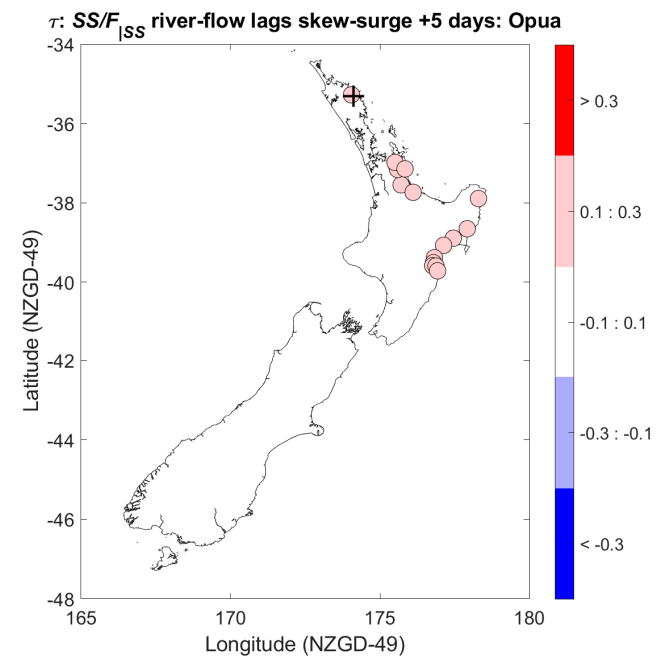

Marsden Point

$\tau: SS/F_{SS}$  river-flow precedes skew-surge 5 days: MarsdenPt

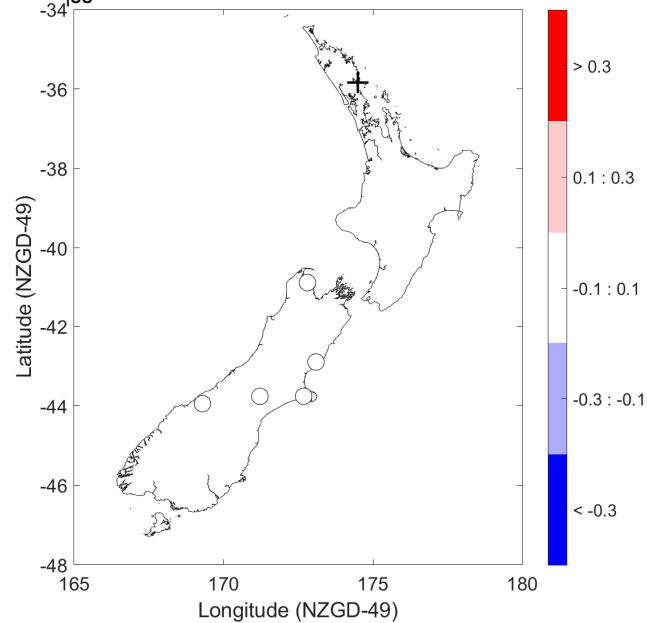

$\tau: SS/F_{SS}$  river-flow precedes skew-surge 4 days: MarsdenPt

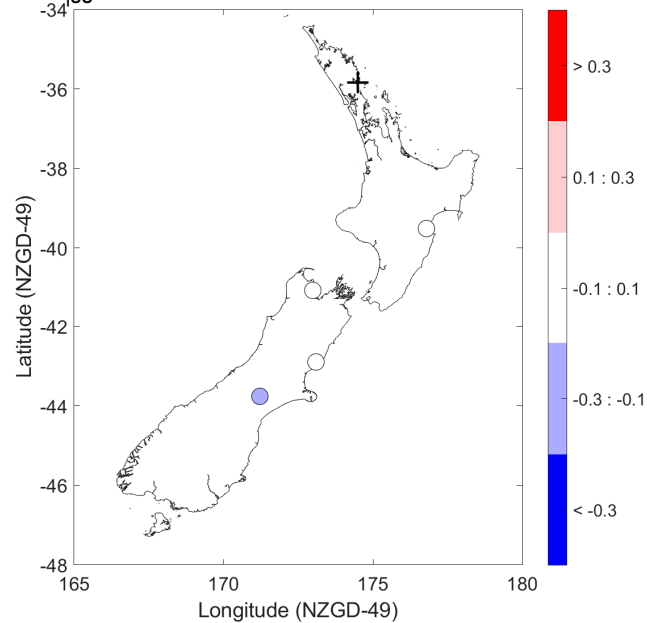

$\tau: SS/F_{SS}$  river-flow precedes skew-surge 3 days: MarsdenPt

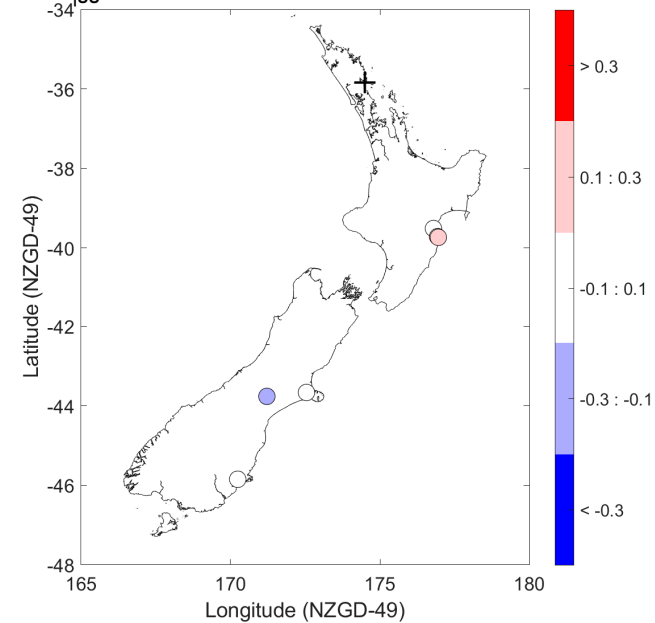

$\tau: SS/F_{SS}$  river-flow precedes skew-surge 2 days: MarsdenPt

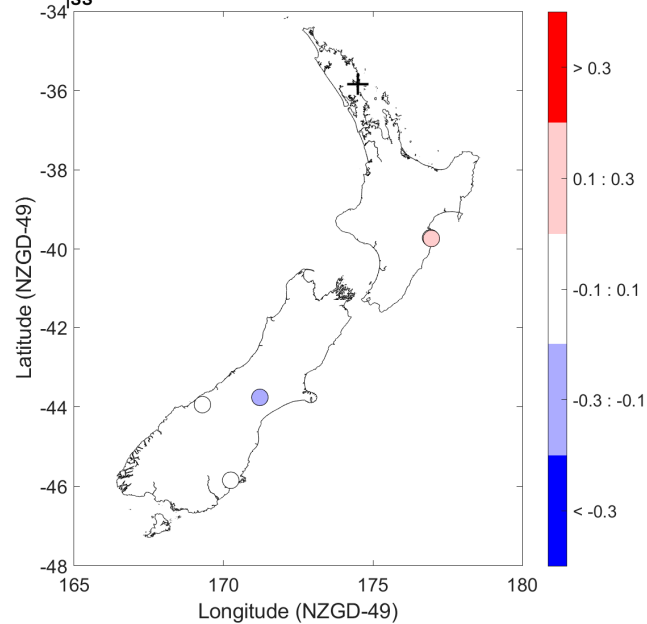

$\tau: SS/F_{SS}$  river-flow precedes skew-surge 1 days: MarsdenPt

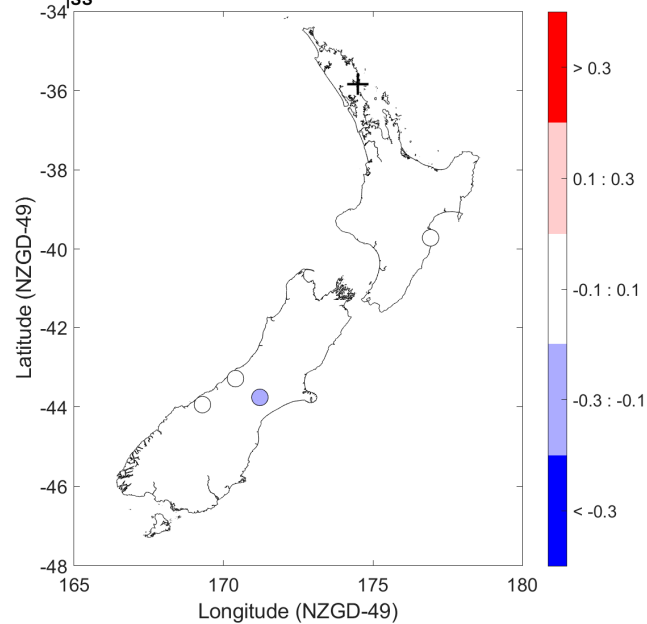

$\tau: SS/F_{SS}$  peak river-flow same day as skew-surge: MarsdenPt

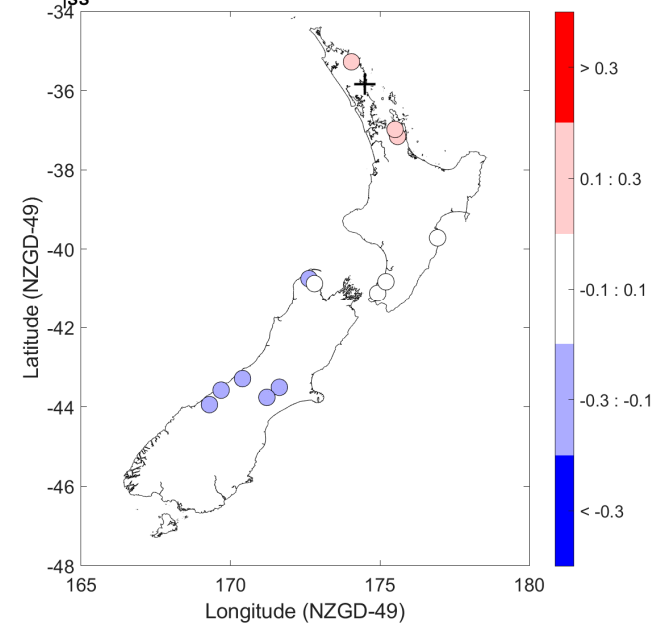

$\tau$ :  $SS/F_{ISS}$  river-flow  $\pm 1$  days of skew-surge: MarsdenPt

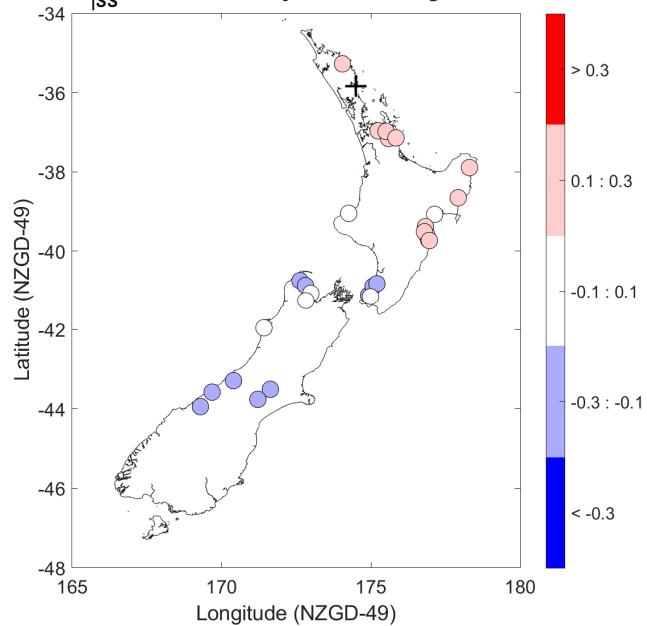

$\tau$ :  $SS/F_{ISS}$  river-flow lags skew-surge +1 days: MarsdenPt

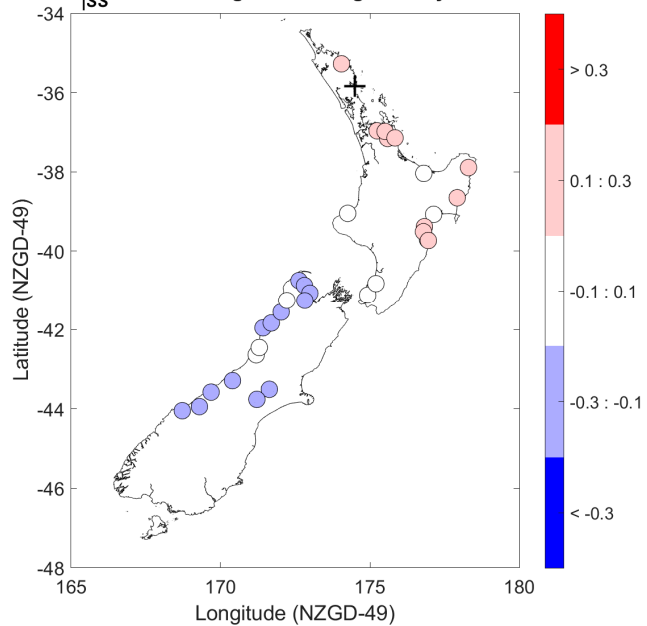

$\tau$ :  $SS/F_{ISS}$  river-flow lags skew-surge +2 days: MarsdenPt

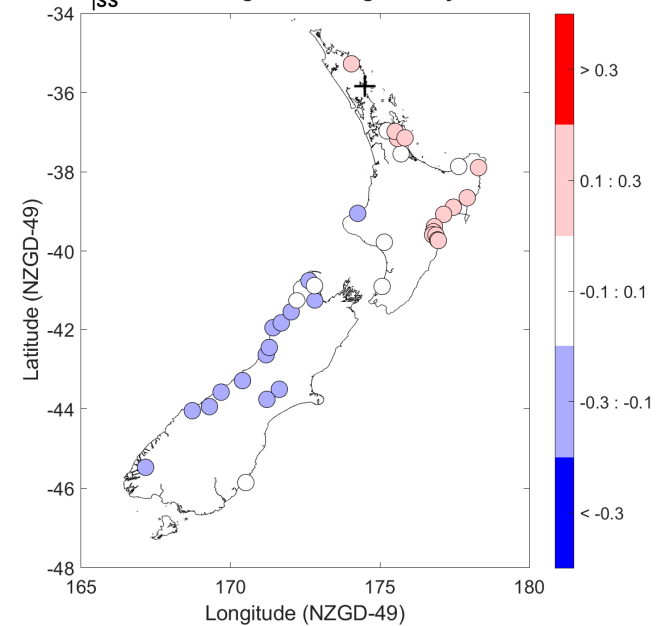

$\tau$ :  $SS/F_{ISS}$  river-flow lags skew-surge +3 days: MarsdenPt

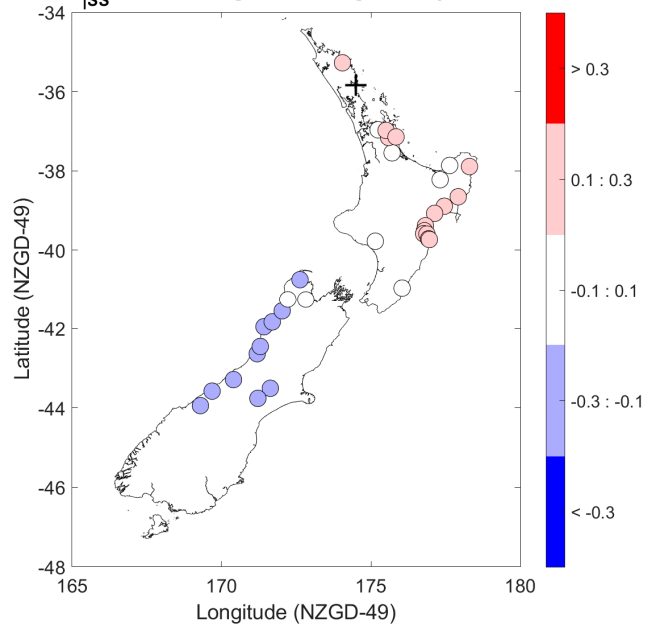

$\tau$ :  $SS/F_{ISS}$  river-flow lags skew-surge +4 days: MarsdenPt

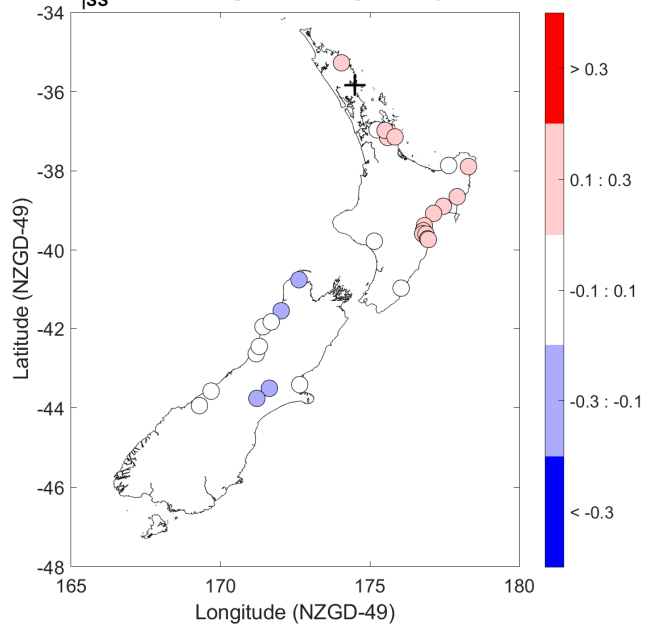

$\tau$ :  $SS/F_{ISS}$  river-flow lags skew-surge +5 days: MarsdenPt

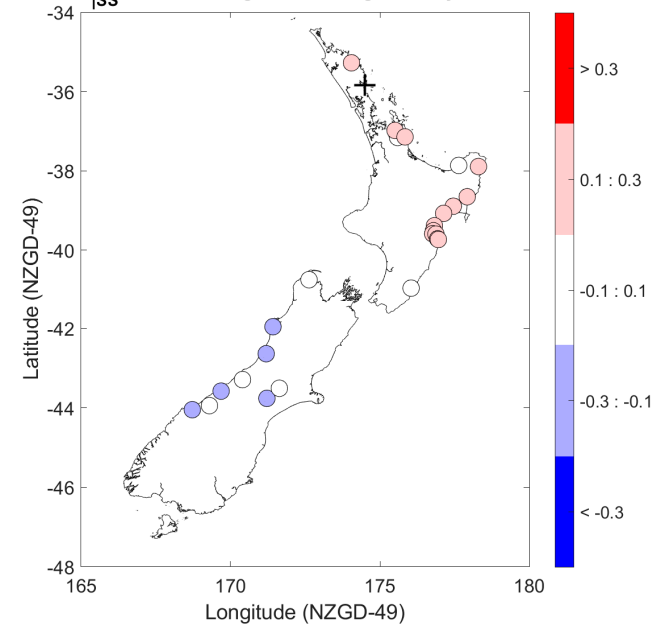

## Auckland

$\tau: SS/F_{SS}$  river-flow precedes skew-surge 5 days: Auckland

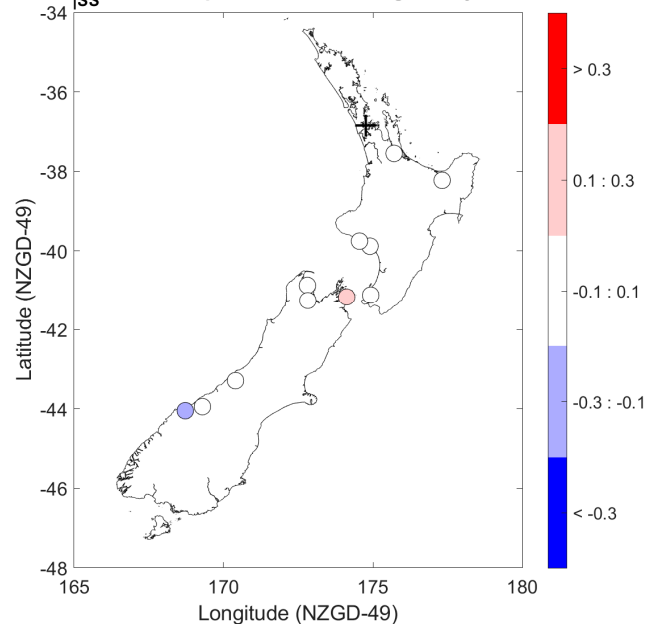

$\tau: SS/F_{SS}$  river-flow precedes skew-surge 4 days: Auckland

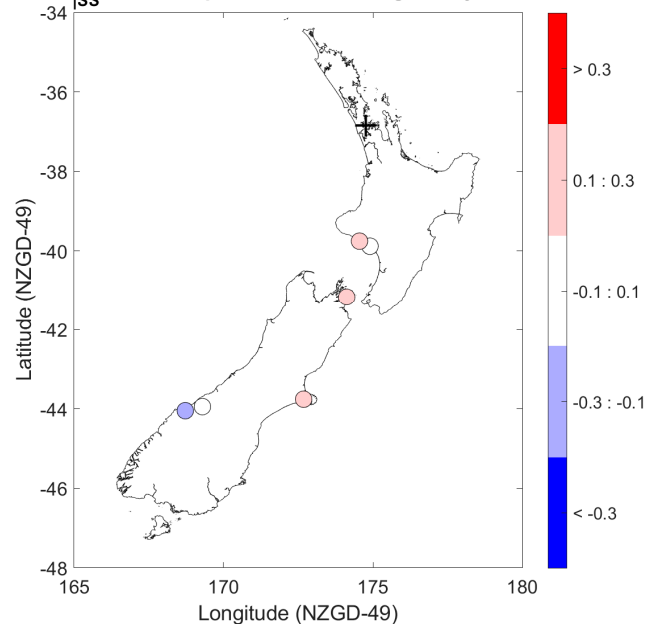

$\tau: SS/F_{SS}$  river-flow precedes skew-surge 3 days: Auckland

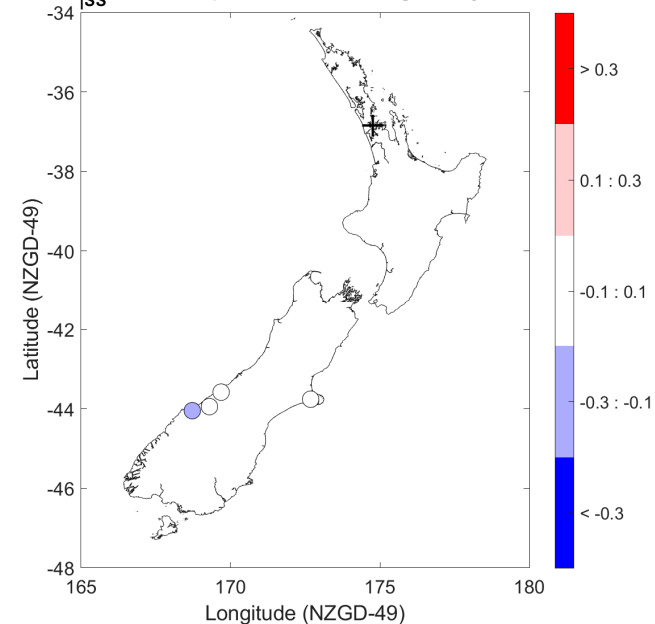

$\tau: SS/F_{SS}$  river-flow precedes skew-surge 2 days: Auckland

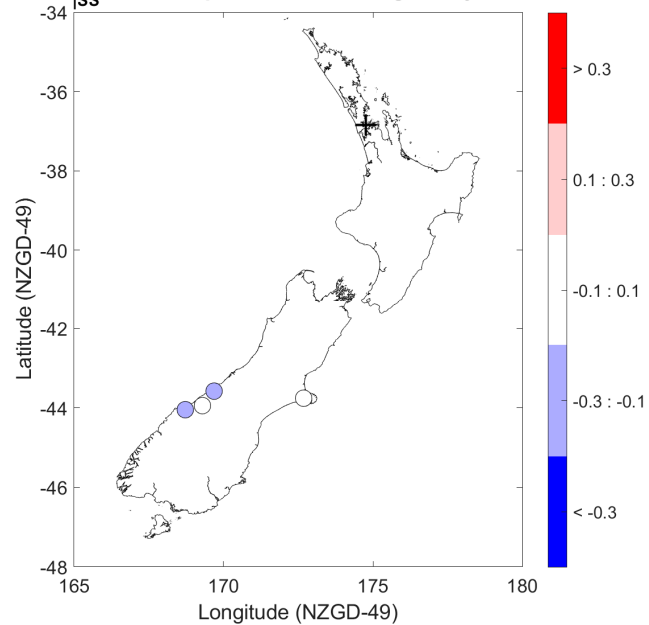

$\tau: SS/F_{SS}$  river-flow precedes skew-surge 1 days: Auckland

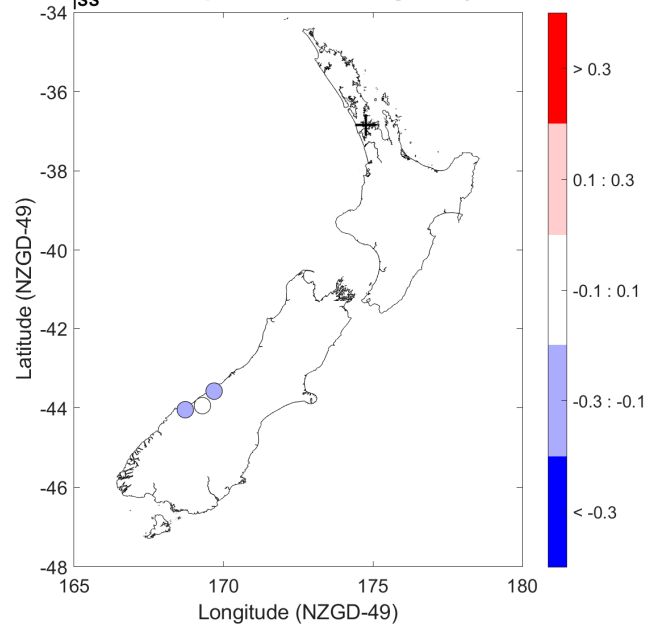

$\tau: SS/F_{SS}$  peak river-flow same day as skew-surge: Auckland

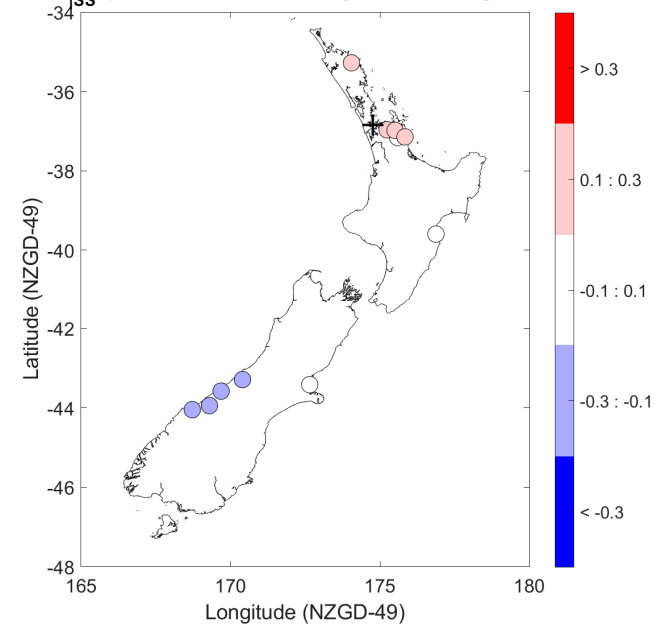

$\tau$ :  $SS/F_{|SS}$  river-flow  $\pm 1$  days of skew-surge: Auckland

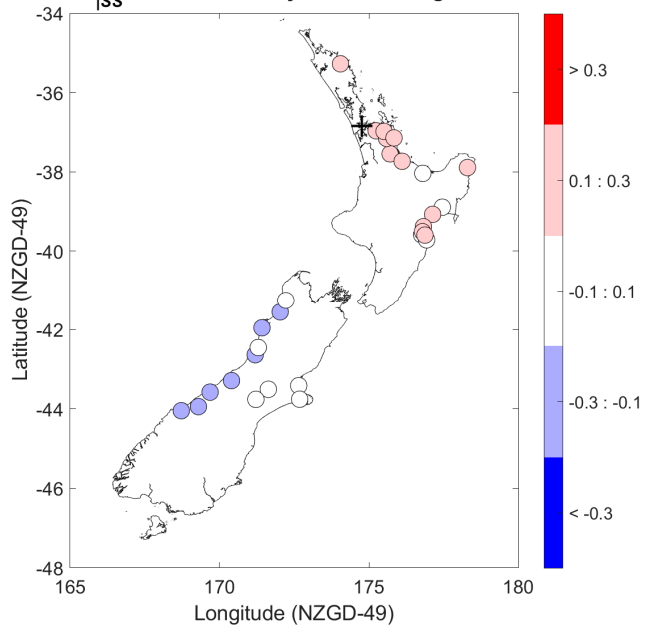

$\tau$ :  $SS/F_{|SS}$  river-flow lags skew-surge +1 days: Auckland

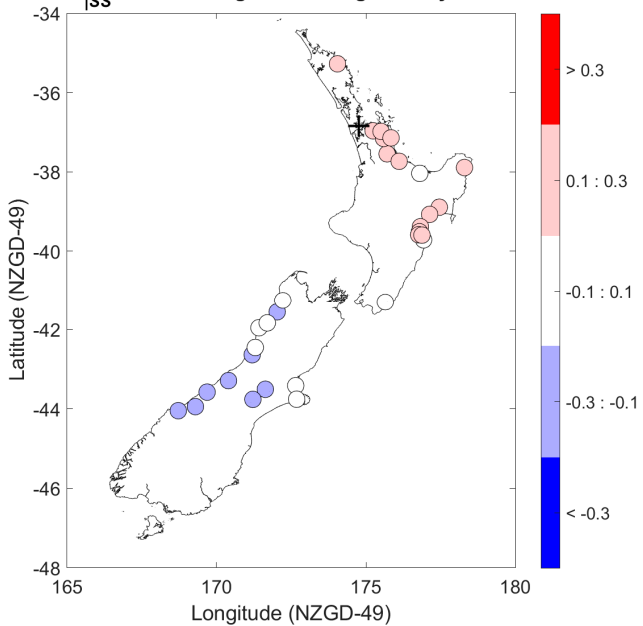

$\tau$ :  $SS/F_{|SS}$  river-flow lags skew-surge +2 days: Auckland

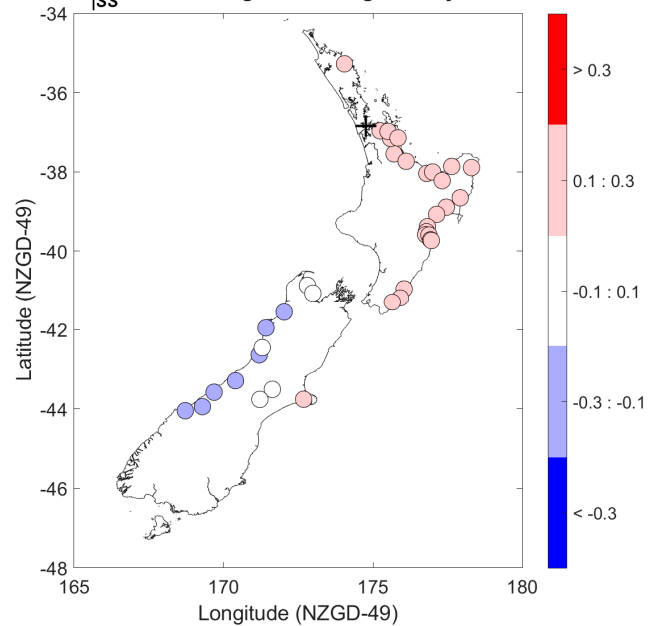

$\tau$ :  $SS/F_{|SS}$  river-flow lags skew-surge +3 days: Auckland

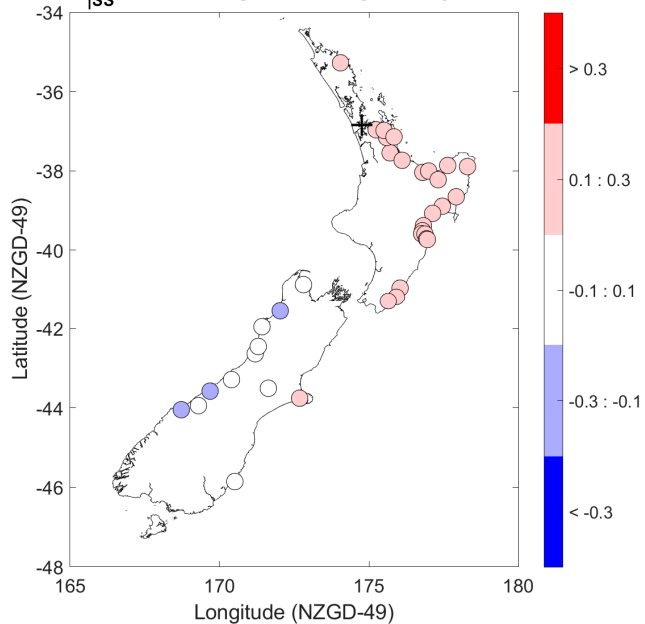

$\tau$ :  $SS/F_{|SS}$  river-flow lags skew-surge +4 days: Auckland

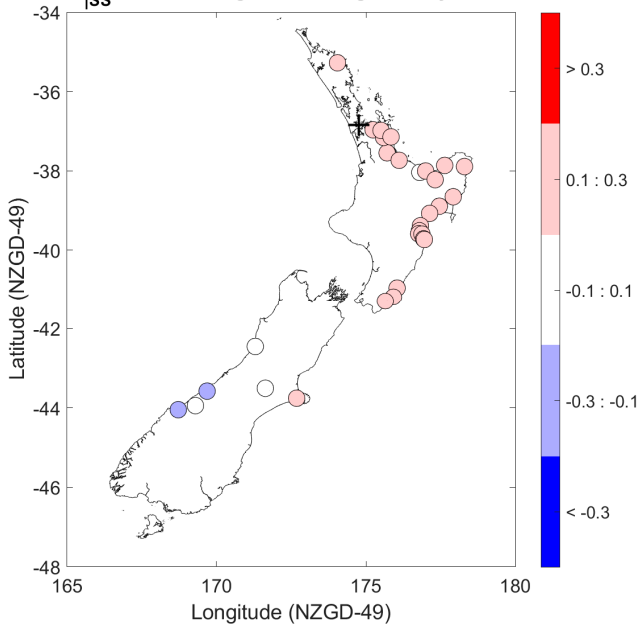

$\tau$ :  $SS/F_{|SS}$  river-flow lags skew-surge +5 days: Auckland

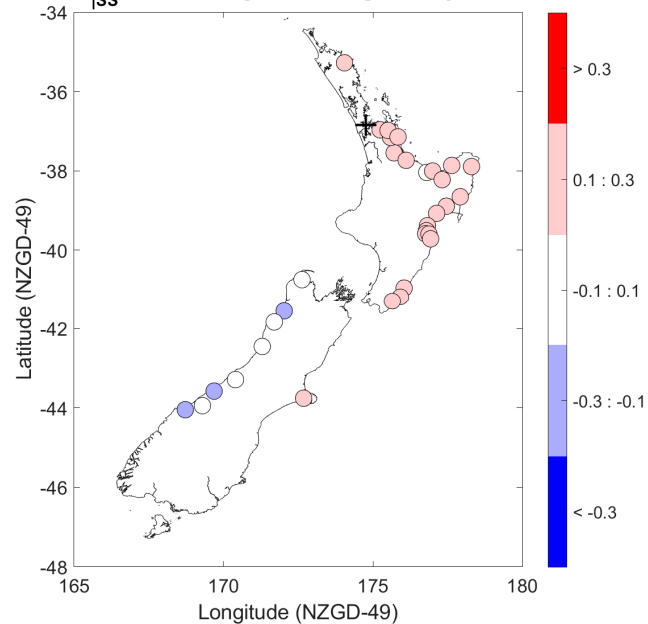

Tararu

$\tau$ :  $SS/F_{ISS}$  river-flow precedes skew-surge 5 days: Tararu

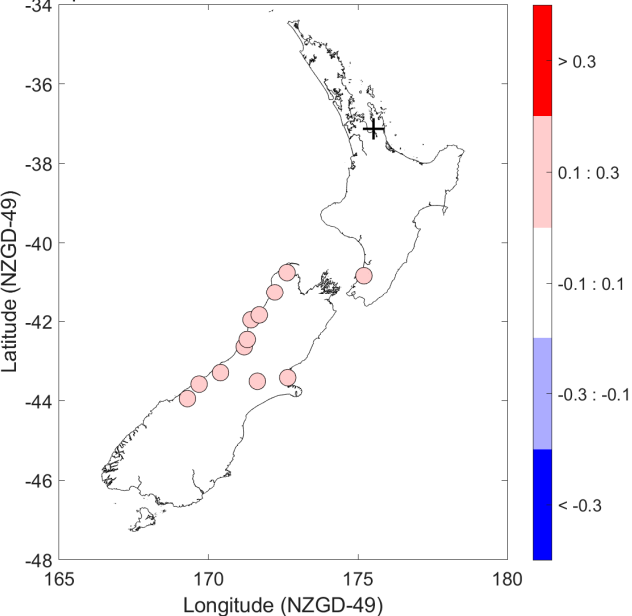

$\tau$ :  $SS/F_{ISS}$  river-flow precedes skew-surge 4 days: Tararu

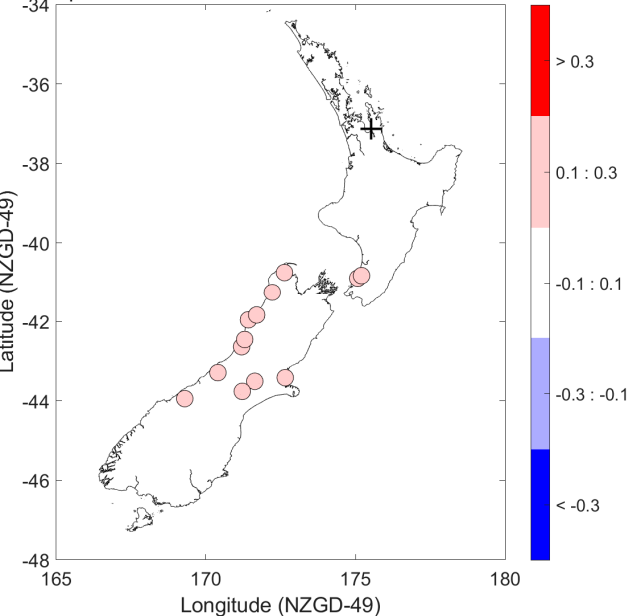

$\tau$ :  $SS/F_{ISS}$  river-flow precedes skew-surge 3 days: Tararu

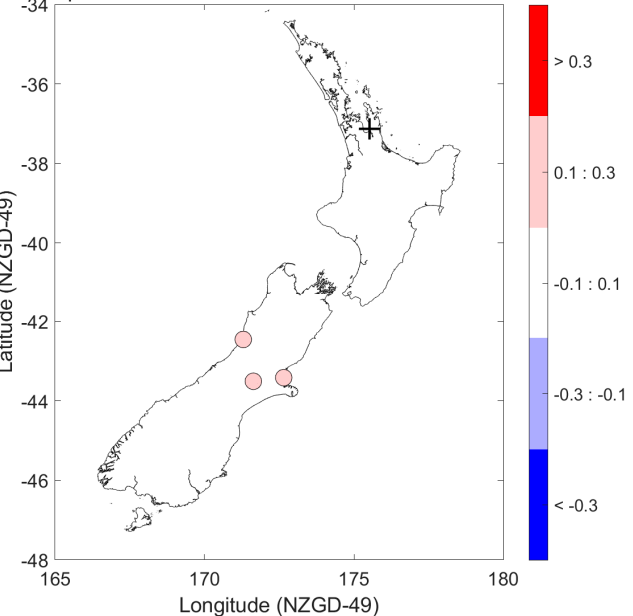

$\tau$ :  $SS/F_{ISS}$  river-flow precedes skew-surge 2 days: Tararu

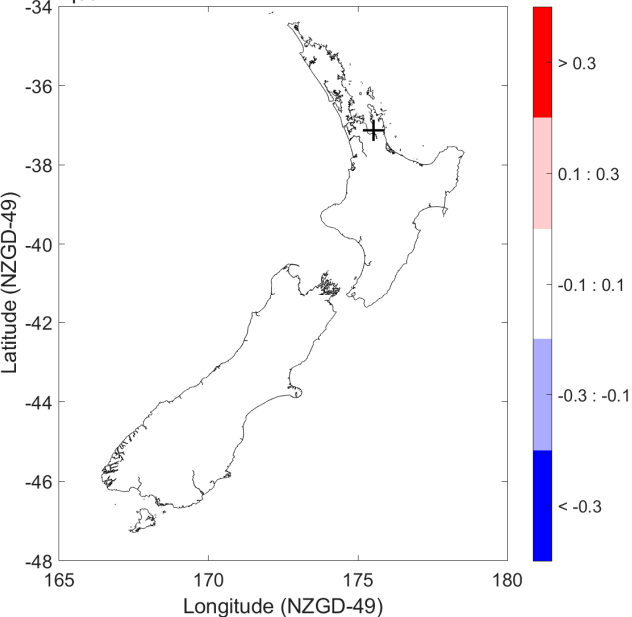

$\tau$ :  $SS/F_{ISS}$  river-flow precedes skew-surge 1 days: Tararu

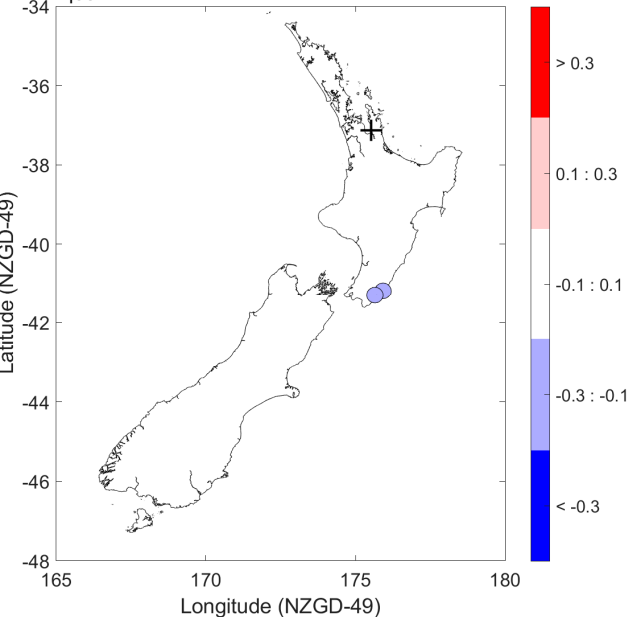

$\tau$ :  $SS/F_{ISS}$ , peak river-flow same day as skew-surge: Tararu

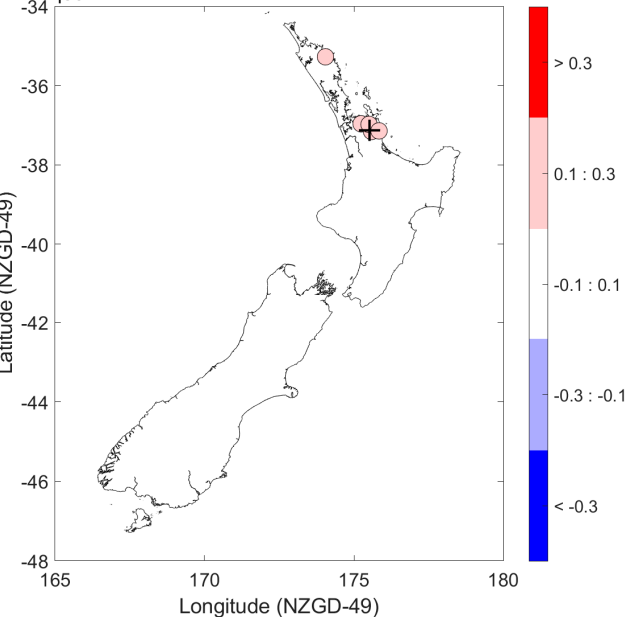

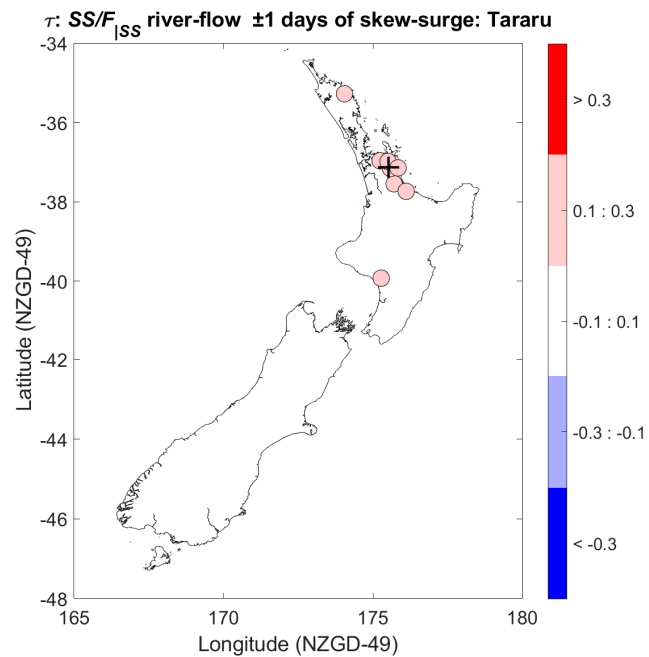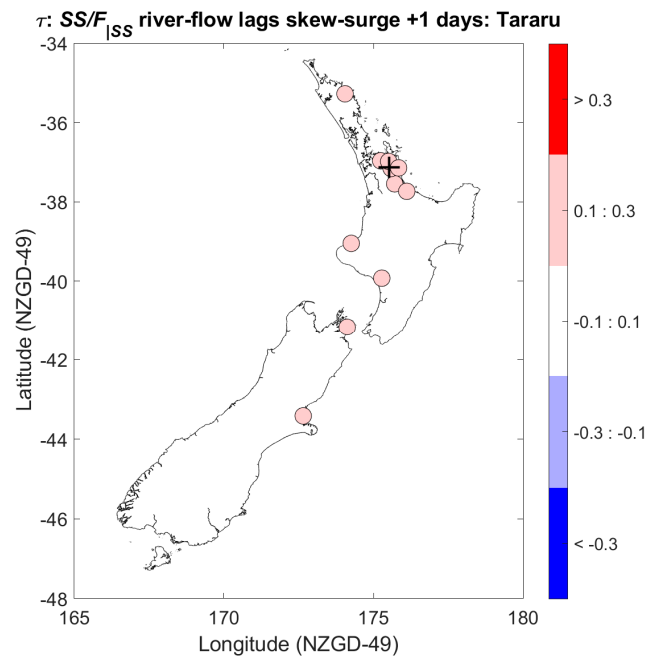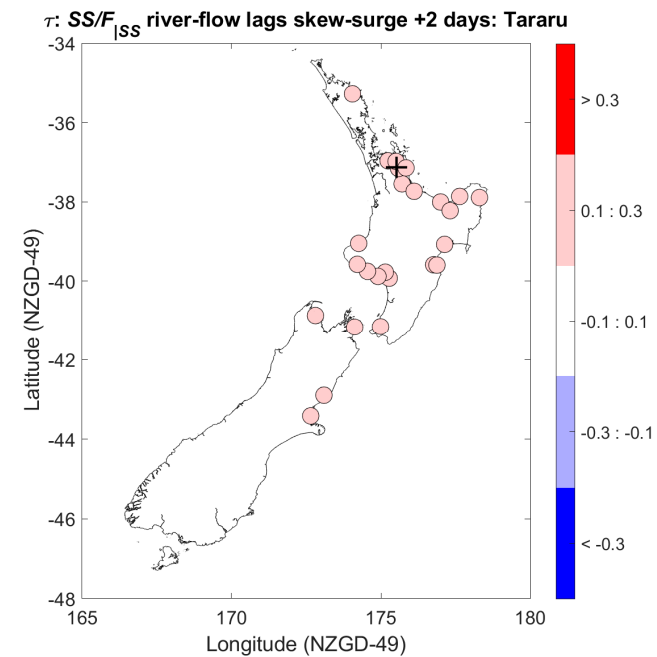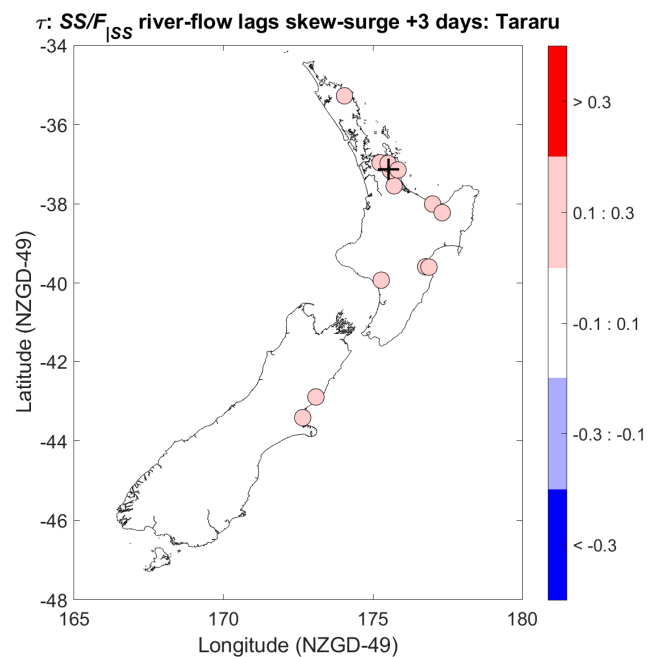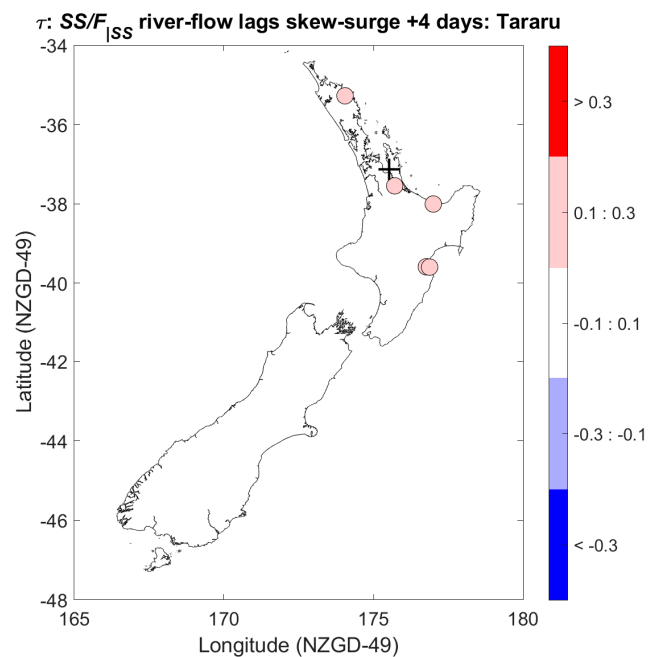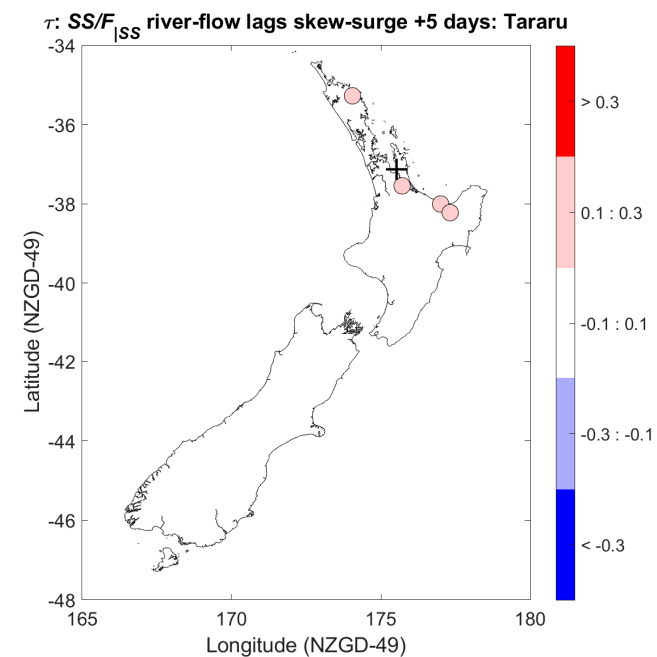

Moturiki

$\tau: SS/F_{ISS}$  river-flow precedes skew-surge 5 days: Moturiki

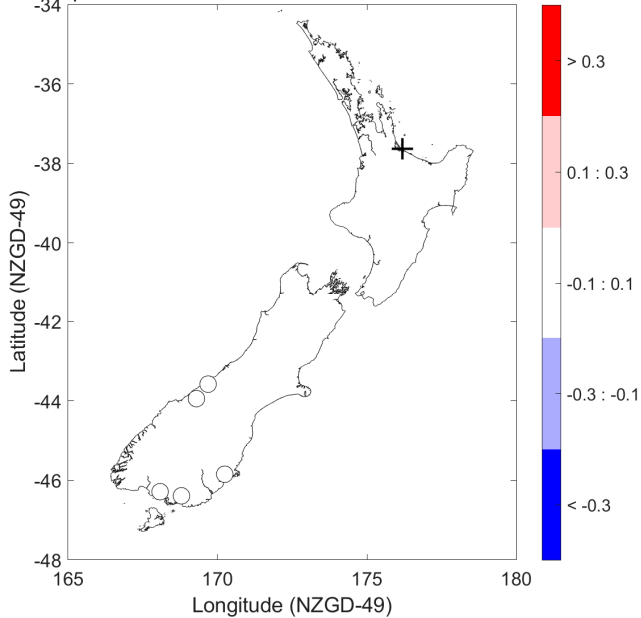

$\tau: SS/F_{ISS}$  river-flow precedes skew-surge 4 days: Moturiki

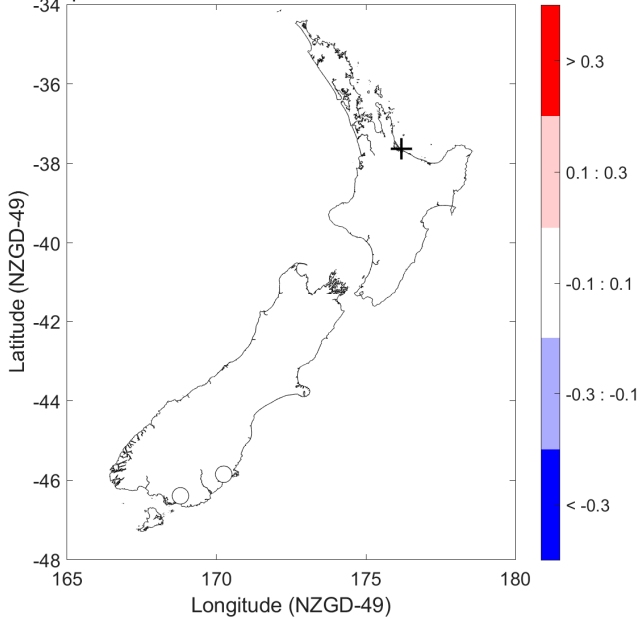

$\tau: SS/F_{ISS}$  river-flow precedes skew-surge 3 days: Moturiki

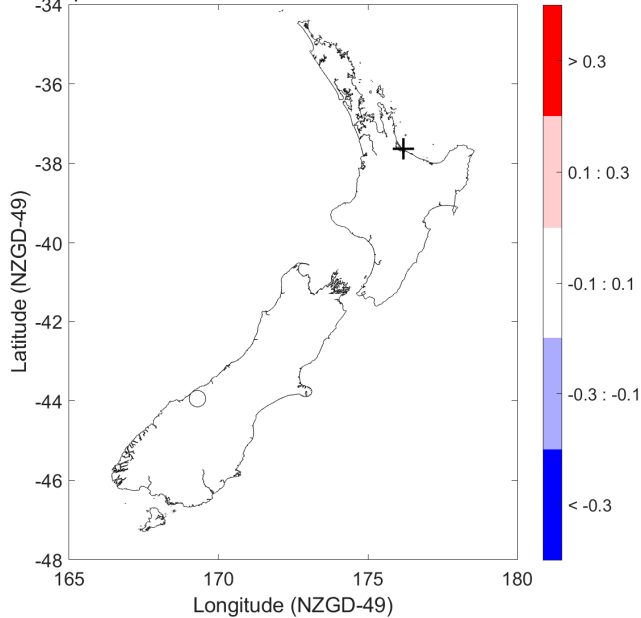

$\tau: SS/F_{ISS}$  river-flow precedes skew-surge 2 days: Moturiki

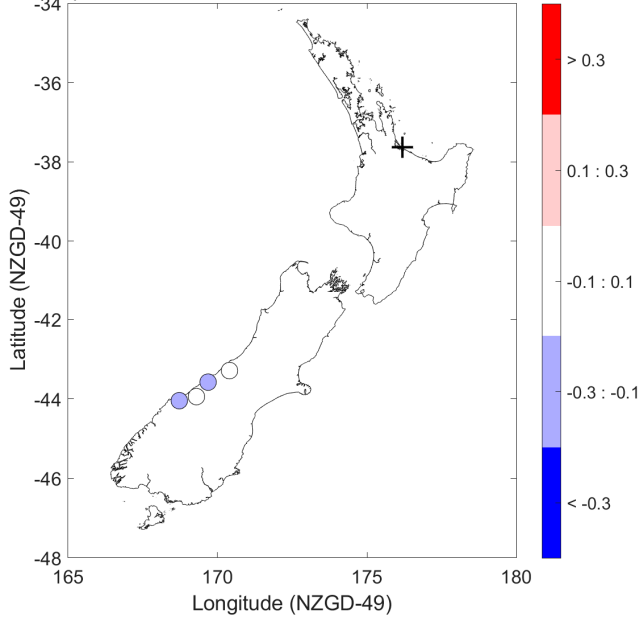

$\tau: SS/F_{ISS}$  river-flow precedes skew-surge 1 days: Moturiki

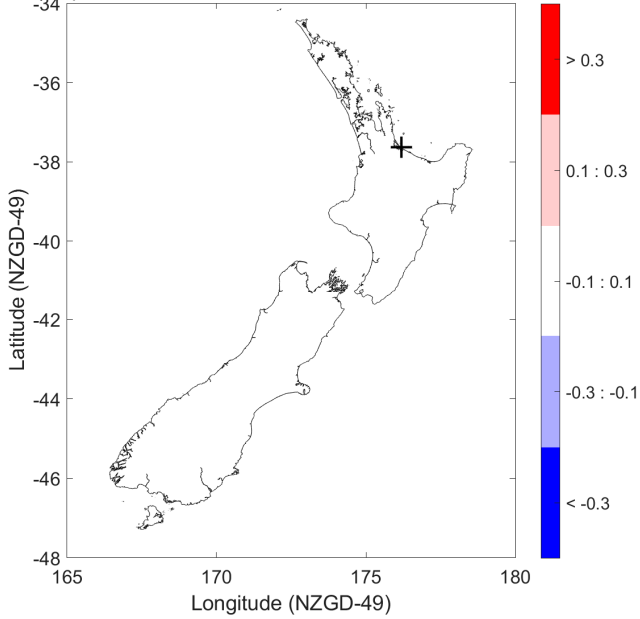

$\tau: SS/F_{ISS}$  peak river-flow same day as skew-surge: Moturiki

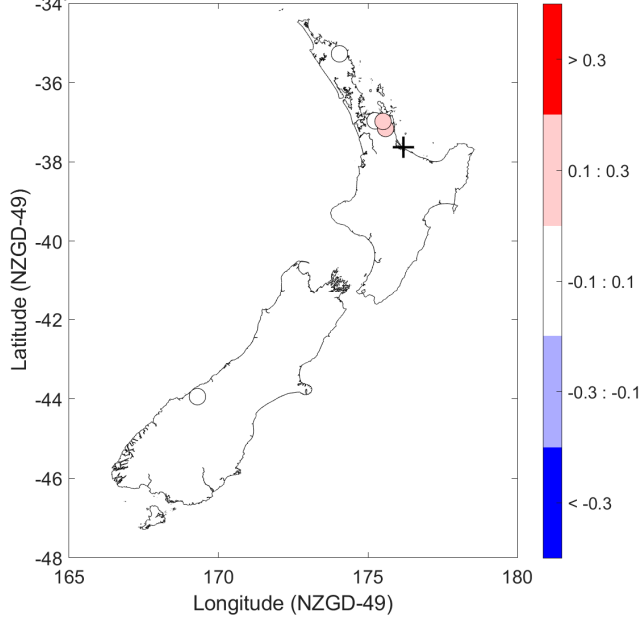



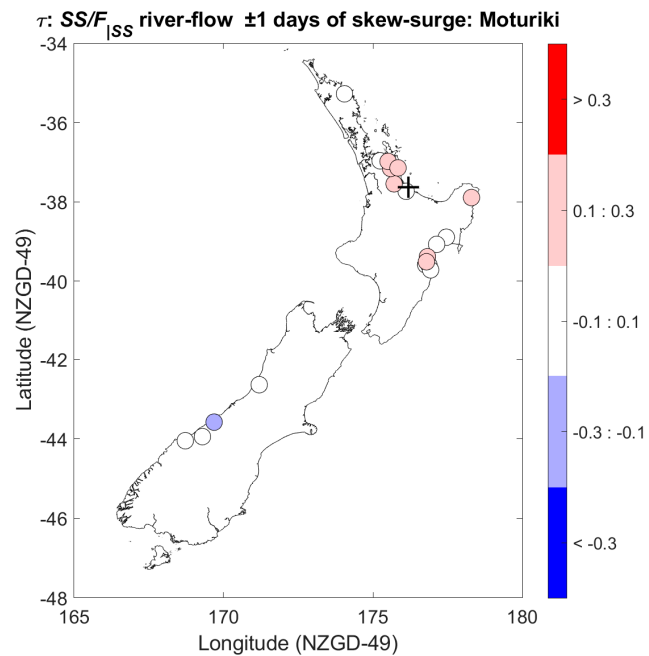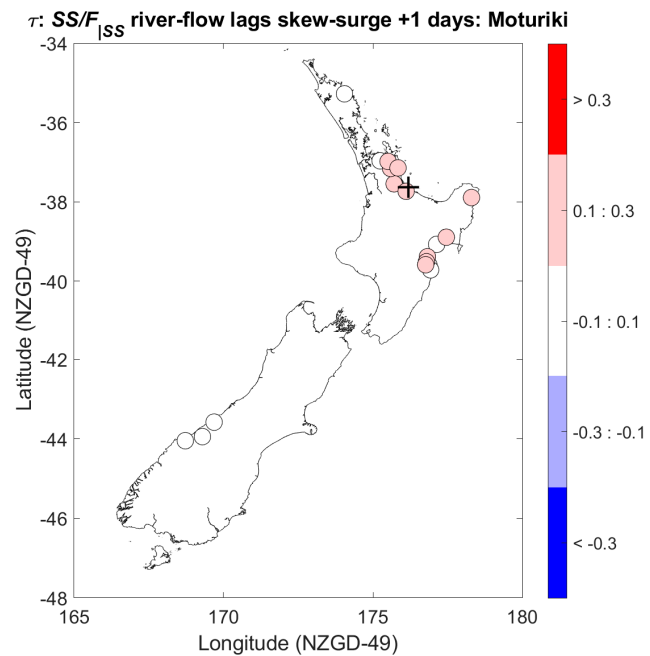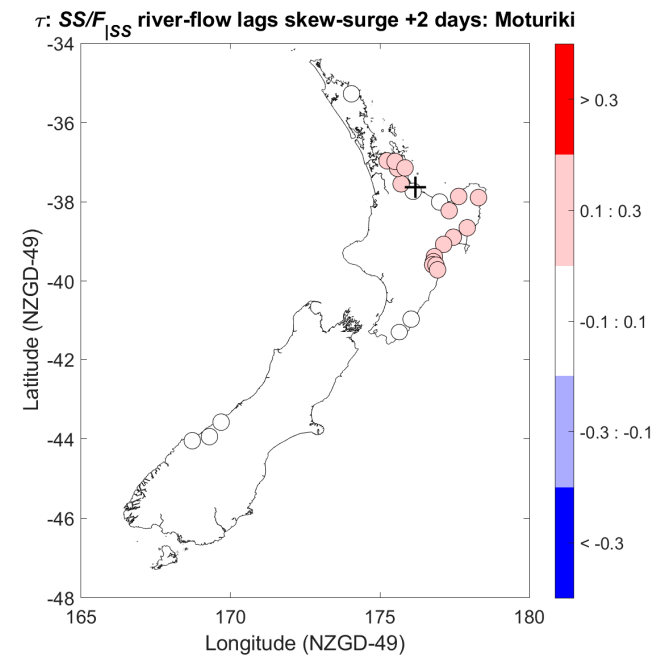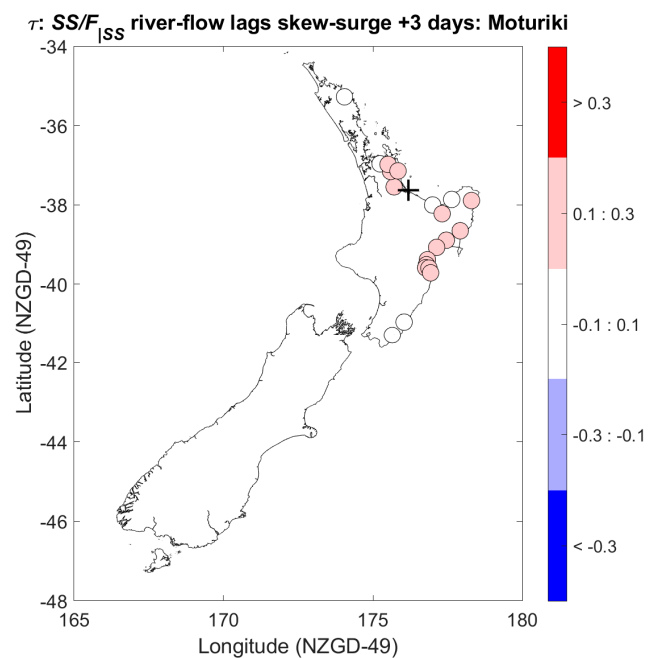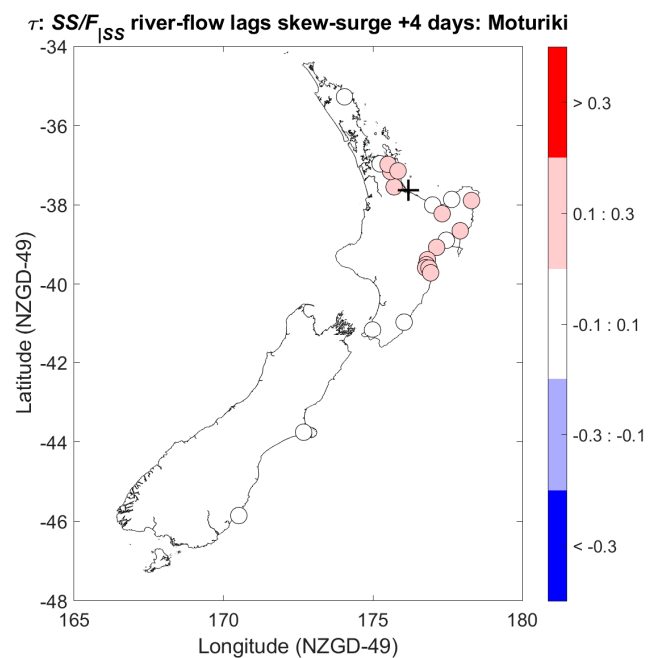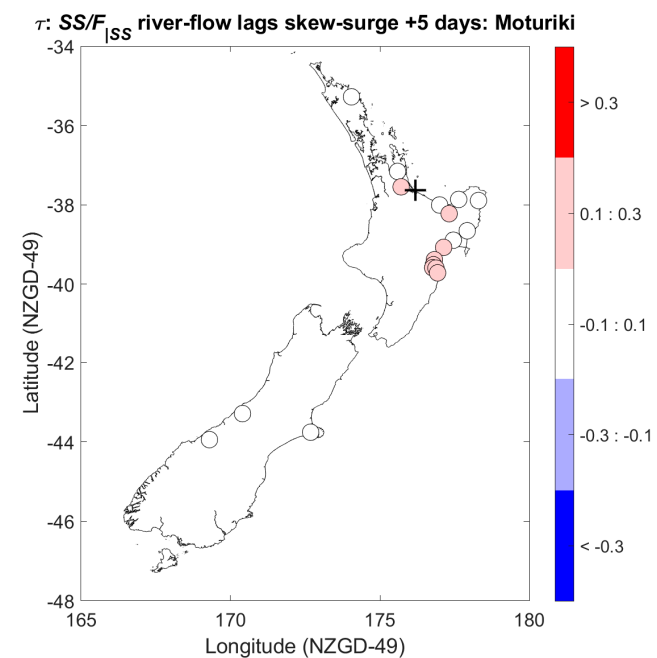

Taranaki

$\tau: SS/F_{SS}$  river-flow precedes skew-surge 5 days: Taranaki

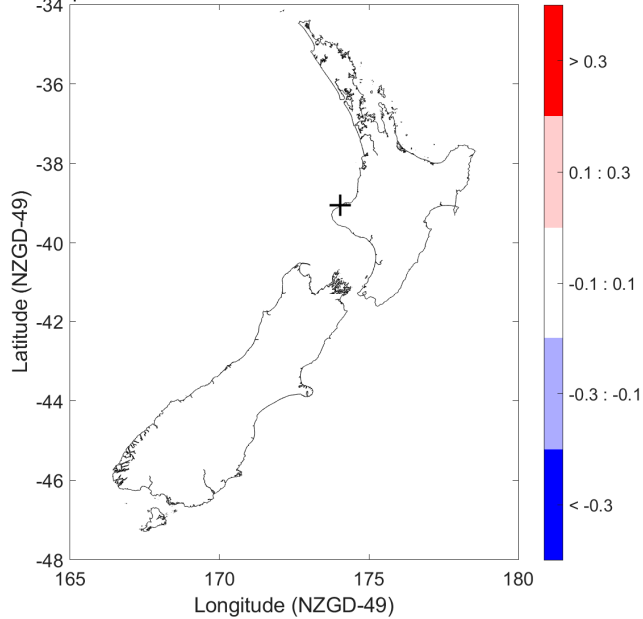

$\tau: SS/F_{SS}$  river-flow precedes skew-surge 4 days: Taranaki

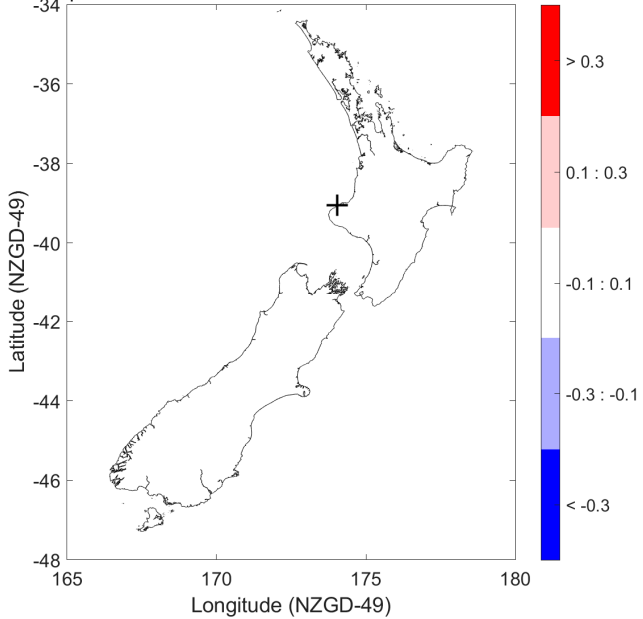

$\tau: SS/F_{SS}$  river-flow precedes skew-surge 3 days: Taranaki

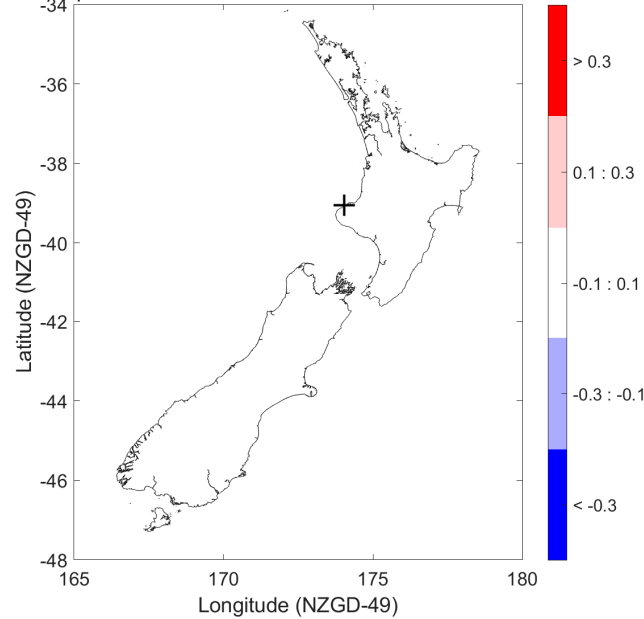

$\tau: SS/F_{SS}$  river-flow precedes skew-surge 2 days: Taranaki

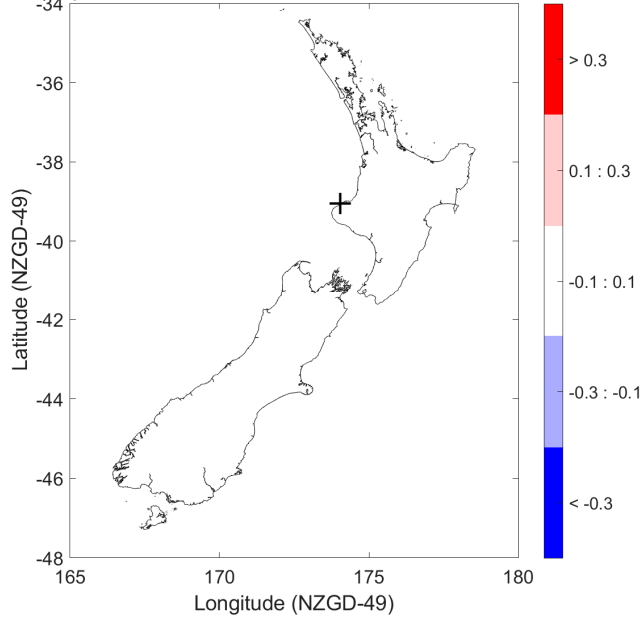

$\tau: SS/F_{SS}$  river-flow precedes skew-surge 1 days: Taranaki

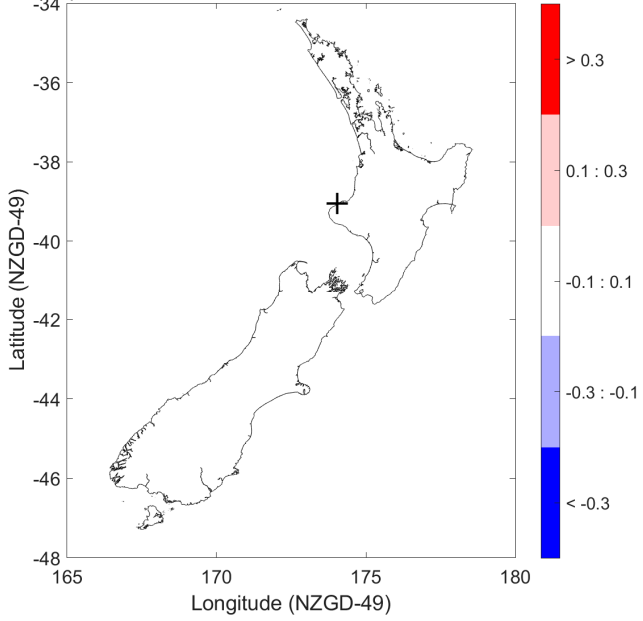

$\tau: SS/F_{SS}$  peak river-flow same day as skew-surge: Taranaki

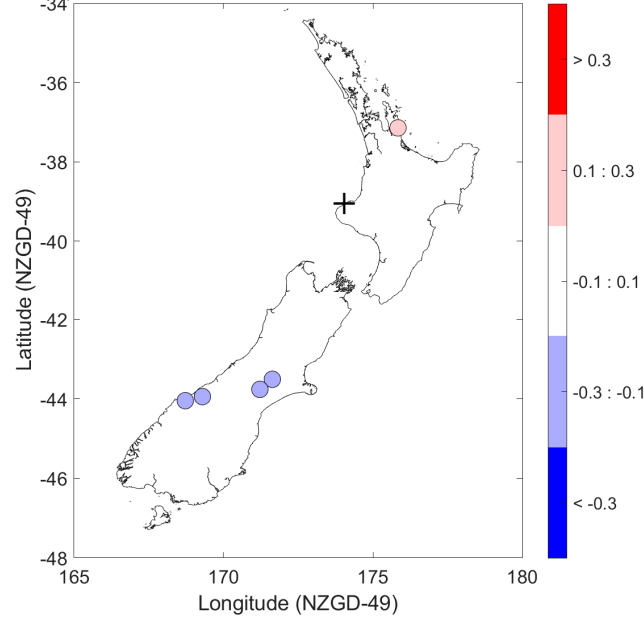

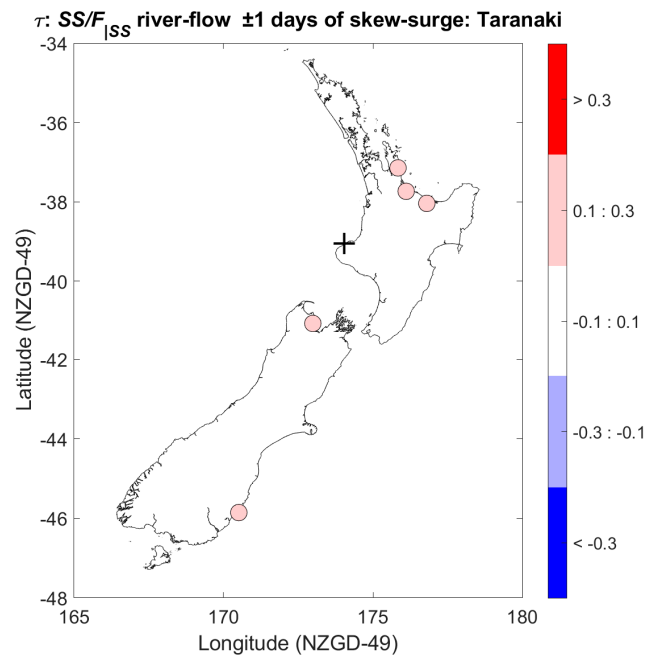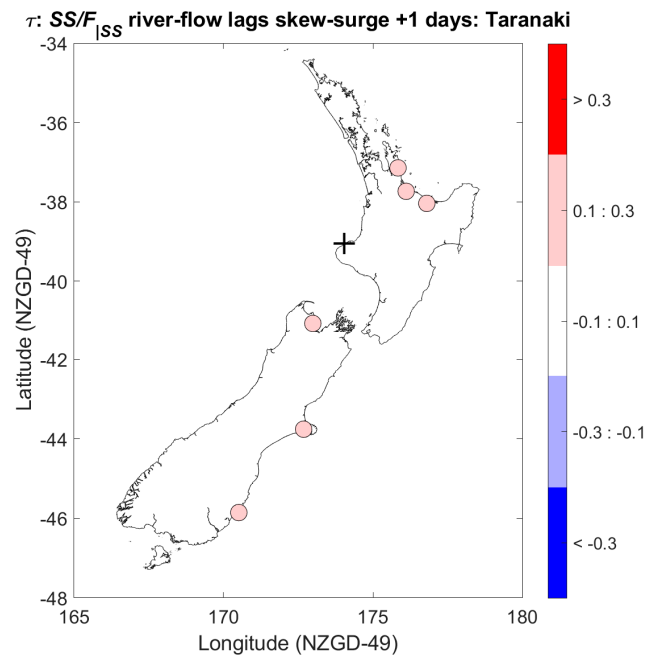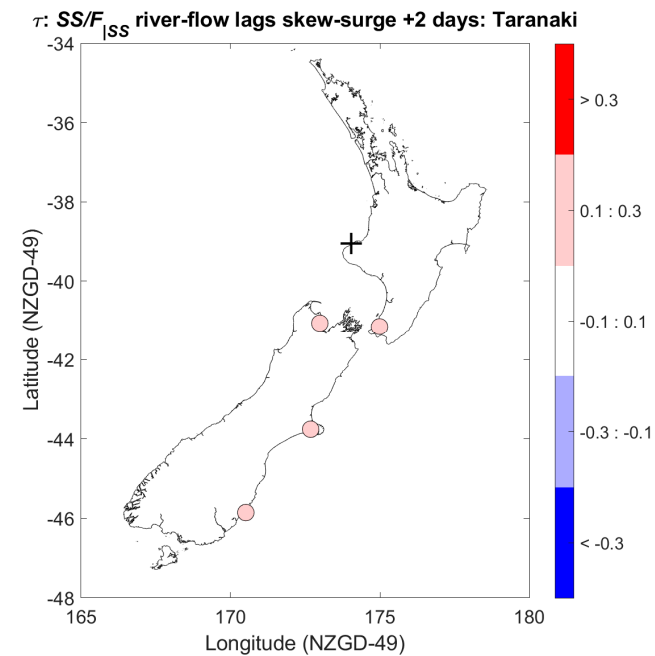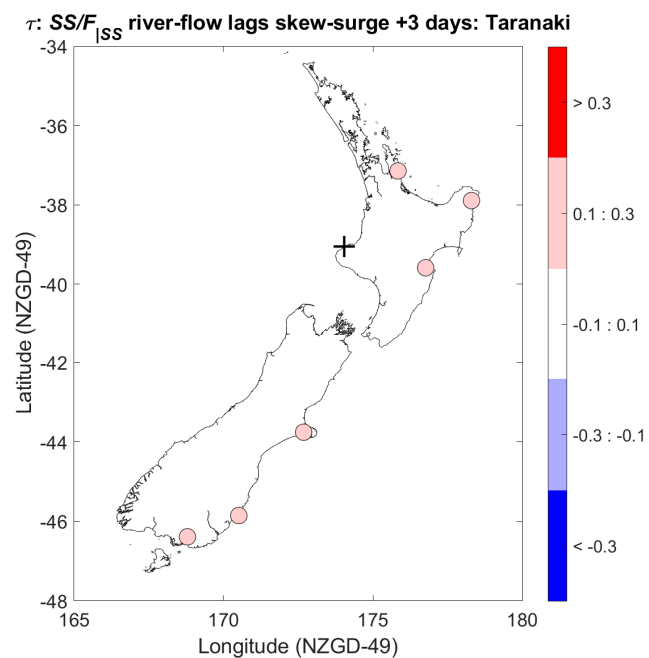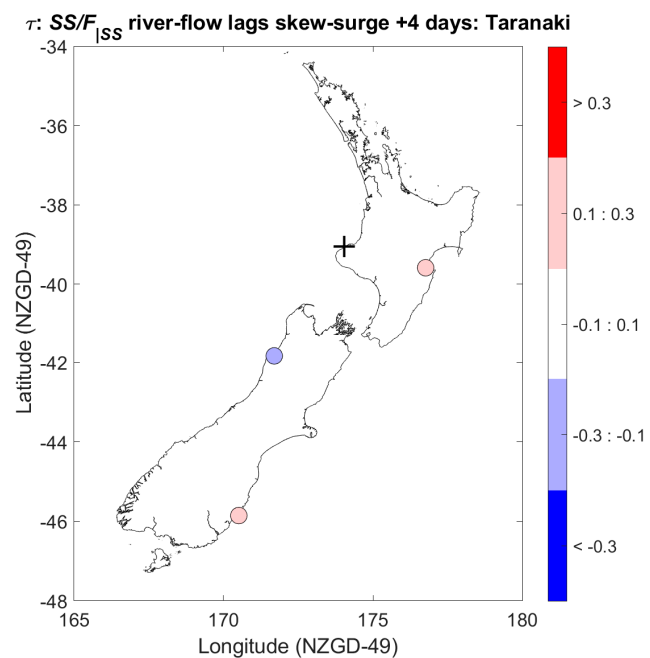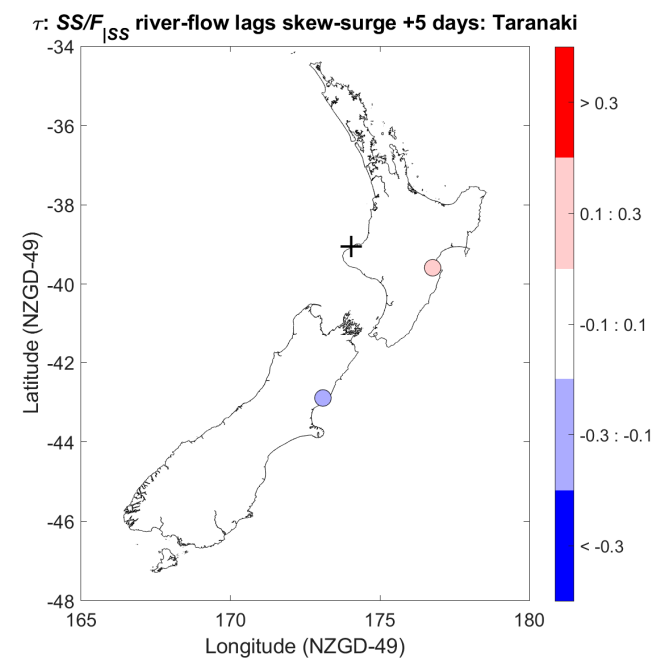

Nelson

$\tau$ :  $SS/F_{ISS}$  river-flow precedes skew-surge 5 days: Nelson

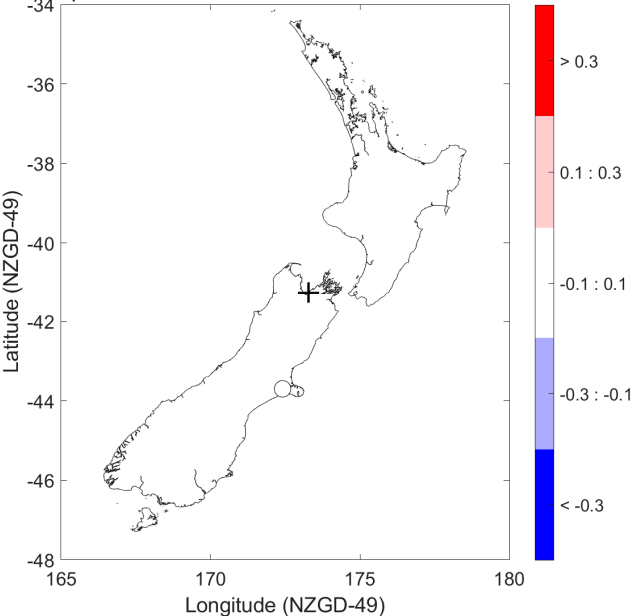

$\tau$ :  $SS/F_{ISS}$  river-flow precedes skew-surge 4 days: Nelson

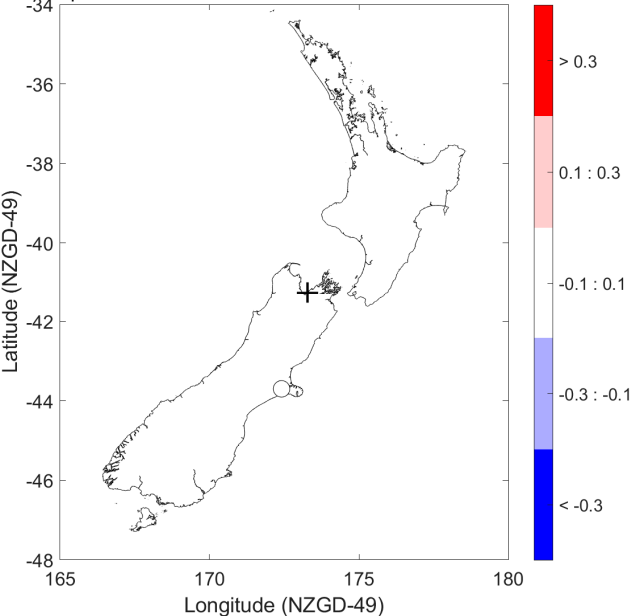

$\tau$ :  $SS/F_{ISS}$  river-flow precedes skew-surge 3 days: Nelson

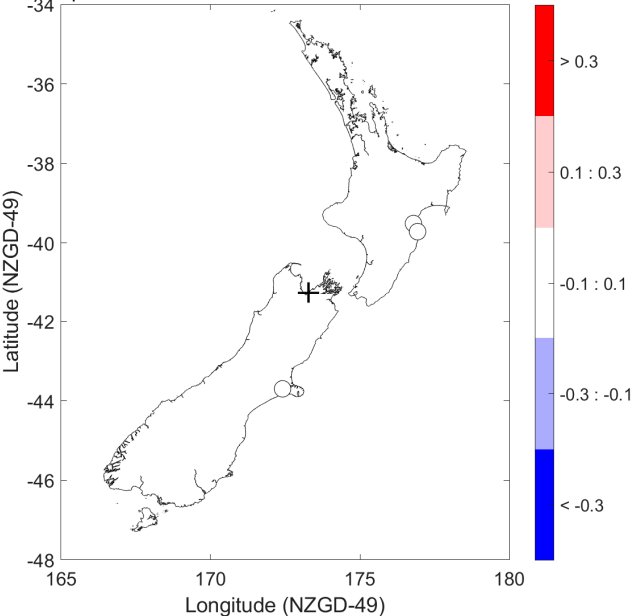

$\tau$ :  $SS/F_{ISS}$  river-flow precedes skew-surge 2 days: Nelson

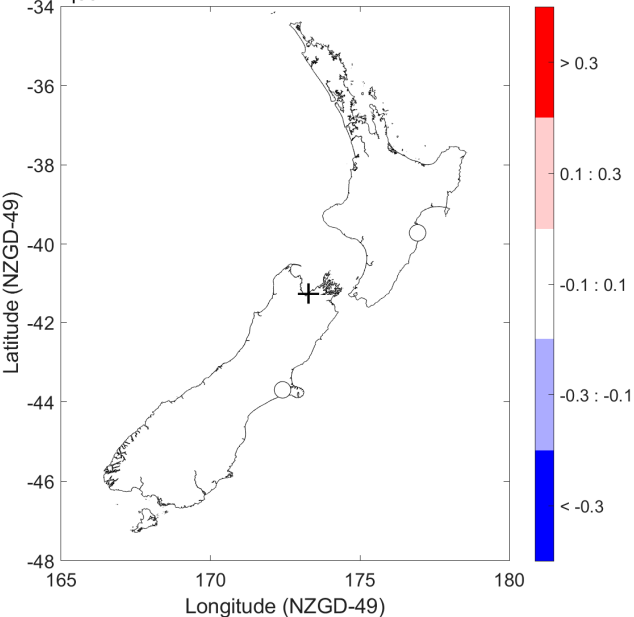

$\tau$ :  $SS/F_{ISS}$  river-flow precedes skew-surge 1 days: Nelson

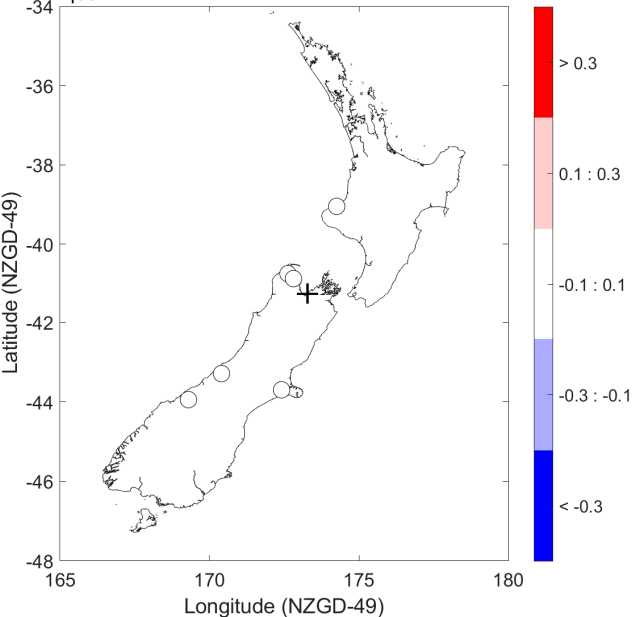

$\tau$ :  $SS/F_{ISS}$ , peak river-flow same day as skew-surge: Nelson

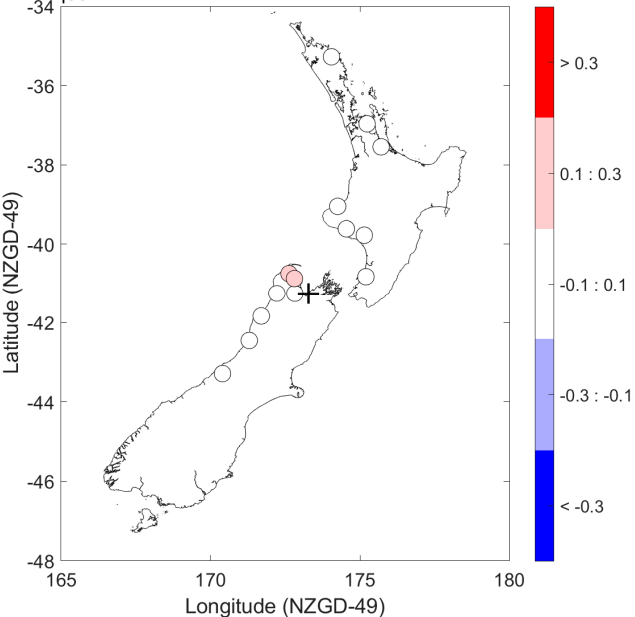

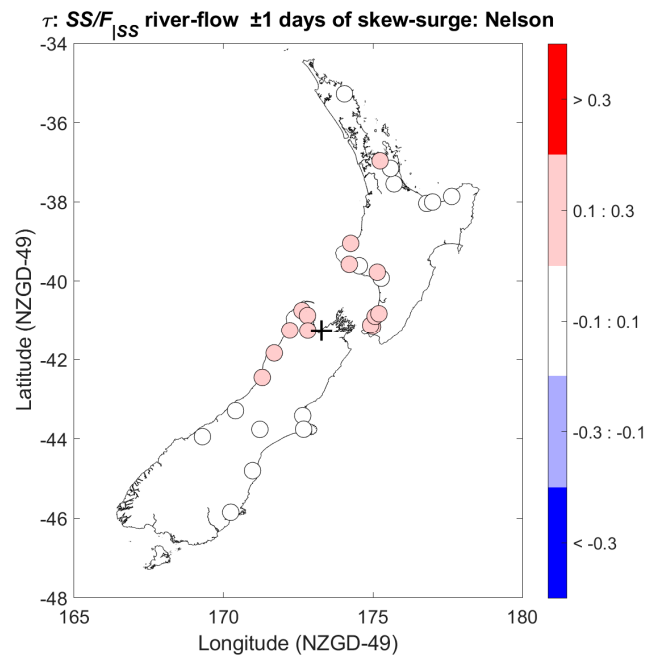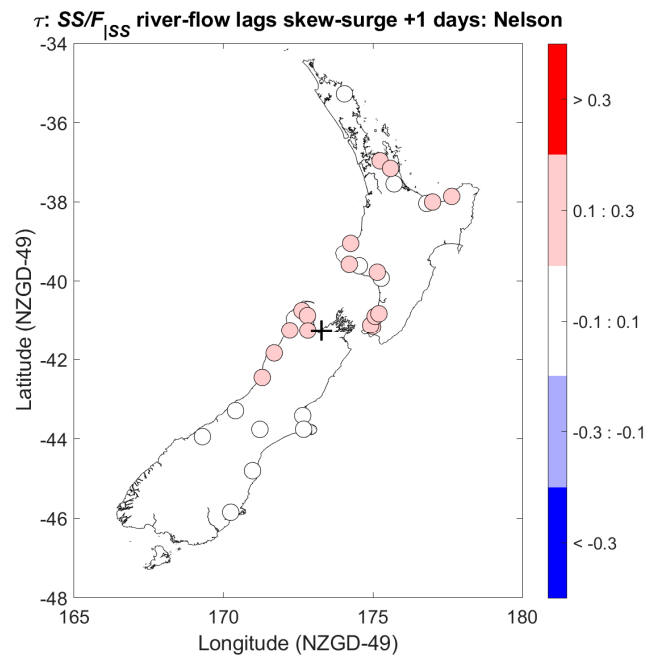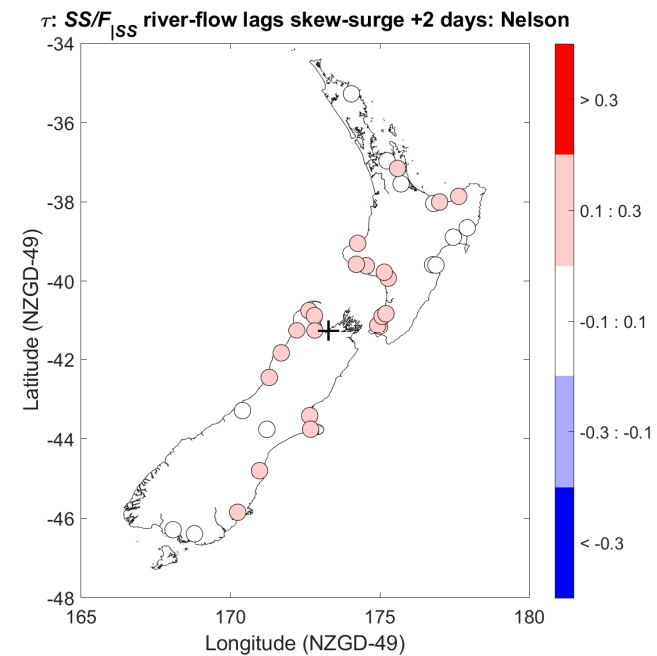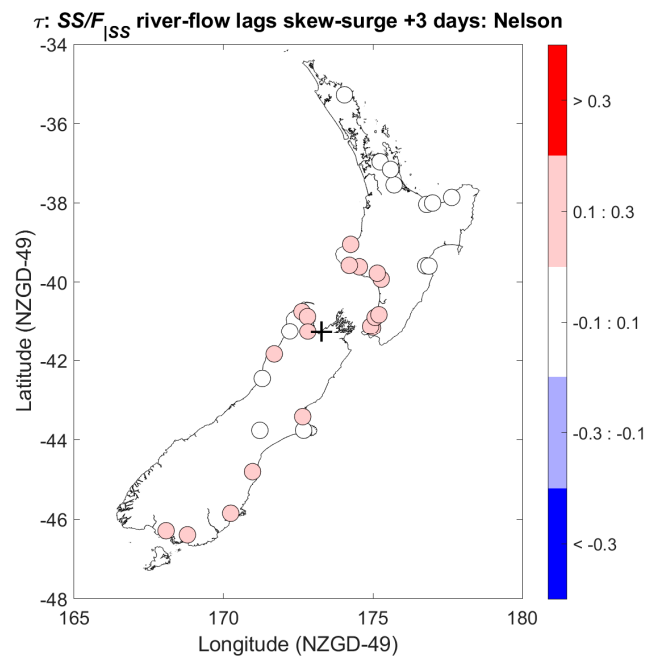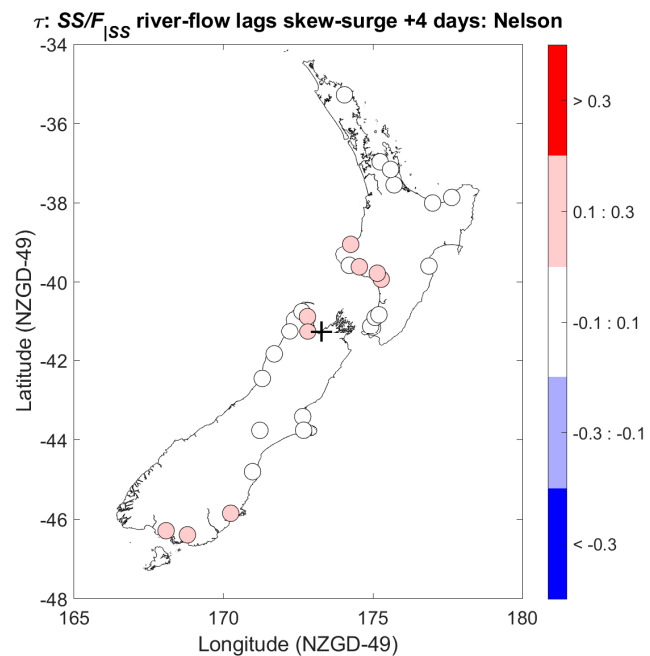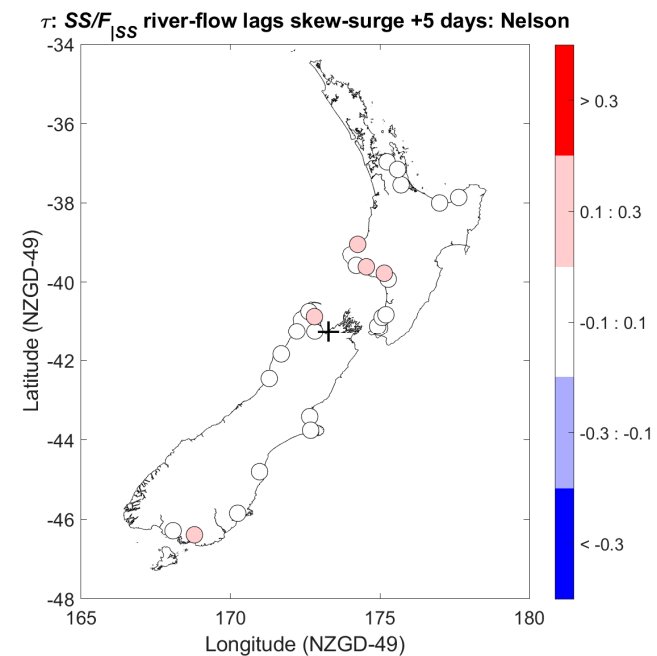

Wellington

$\tau$ :  $SS/F_{ss}$  river-flow precedes skew-surge 5 days: Wellington

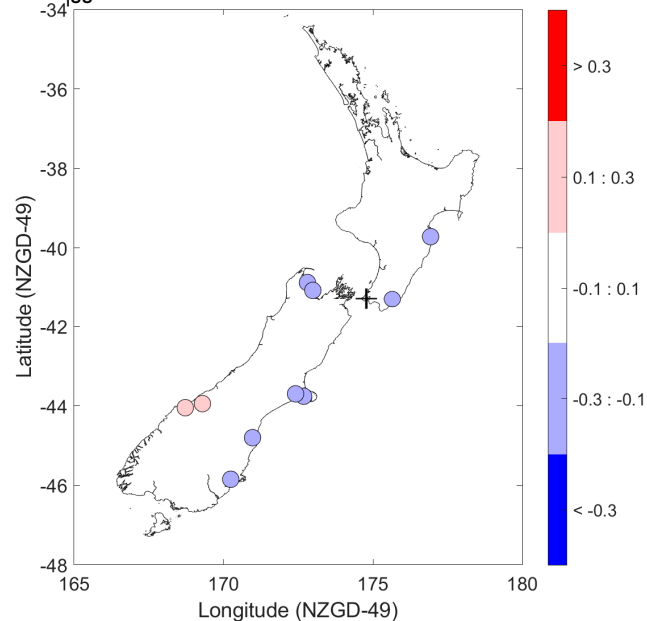

$\tau$ :  $SS/F_{ss}$  river-flow precedes skew-surge 4 days: Wellington

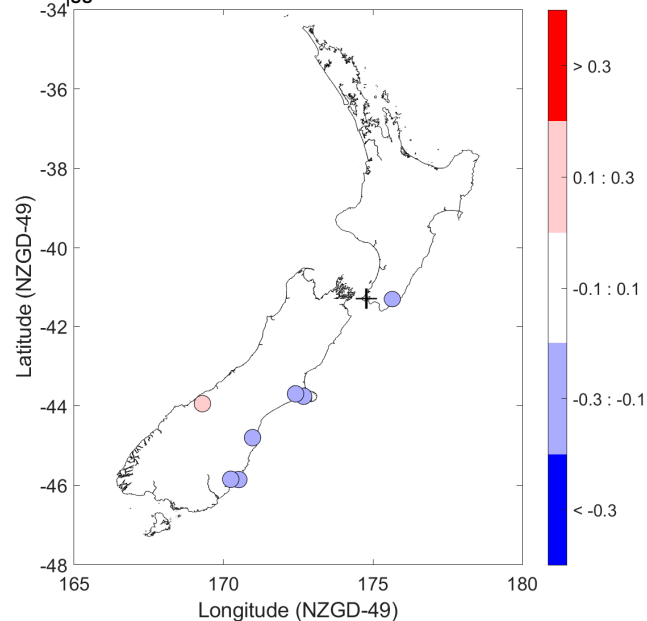

$\tau$ :  $SS/F_{ss}$  river-flow precedes skew-surge 3 days: Wellington

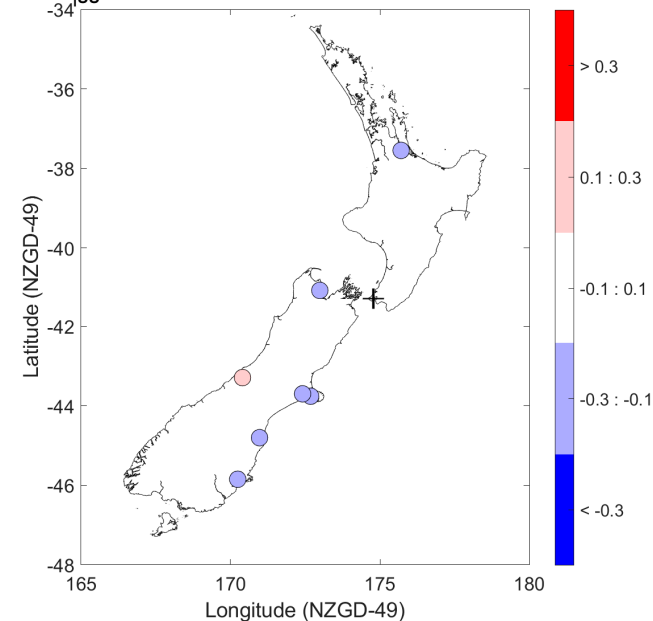

$\tau$ :  $SS/F_{ss}$  river-flow precedes skew-surge 2 days: Wellington

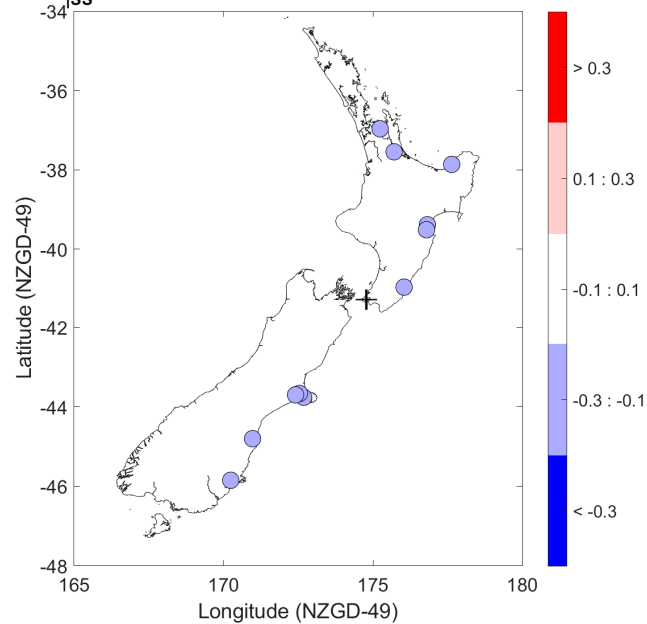

$\tau$ :  $SS/F_{ss}$  river-flow precedes skew-surge 1 days: Wellington

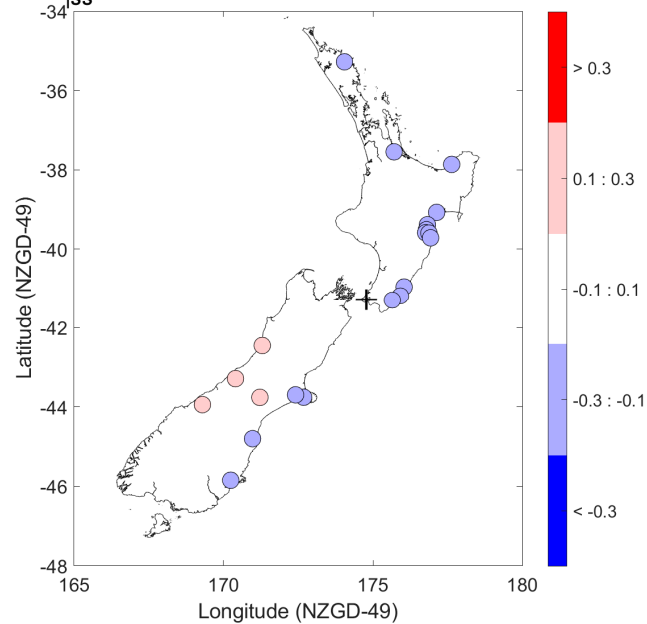

$\tau$ :  $SS/F_{ss}$  peak river-flow same day as skew-surge: Wellington

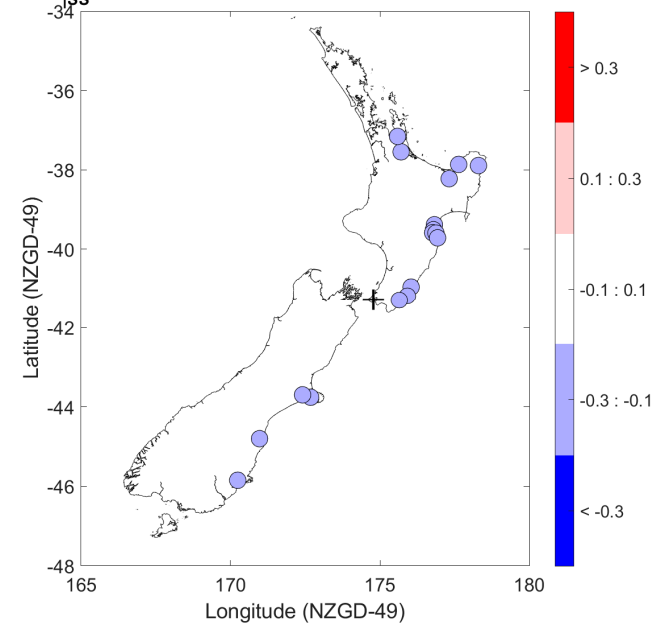

$\tau$ :  $SS/F_{ISS}$  river-flow  $\pm 1$  days of skew-surge: Wellington

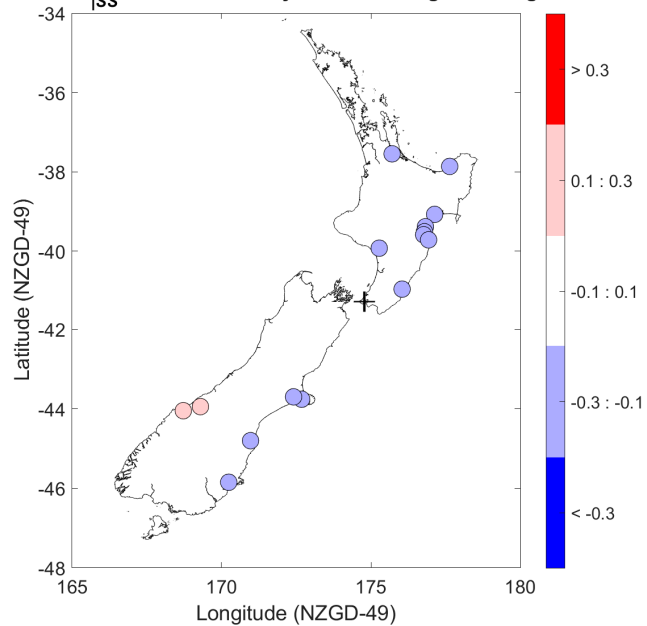

$\tau$ :  $SS/F_{ISS}$  river-flow lags skew-surge +1 days: Wellington

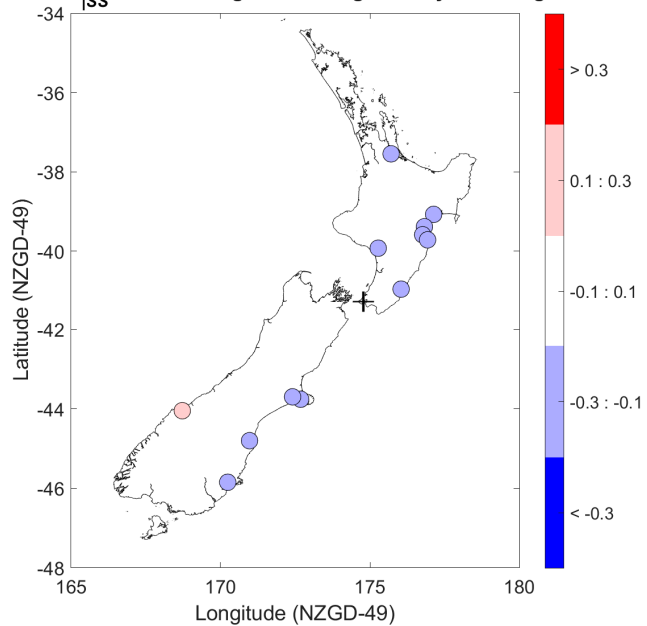

$\tau$ :  $SS/F_{ISS}$  river-flow lags skew-surge +2 days: Wellington

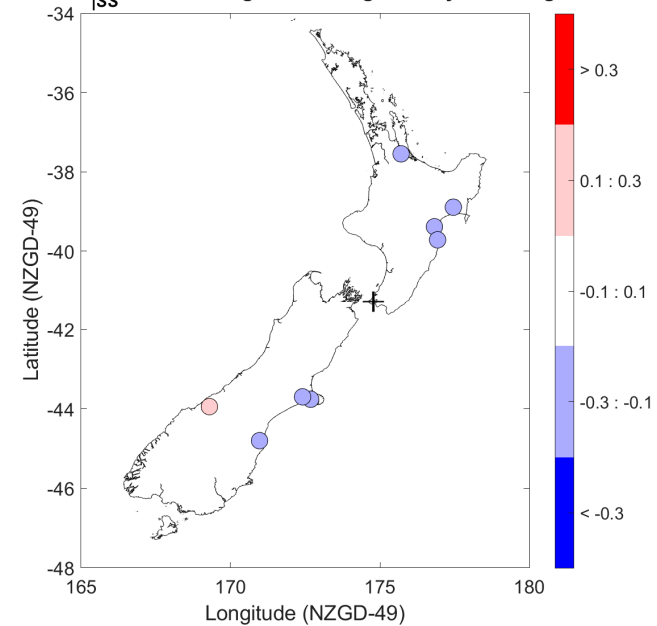

$\tau$ :  $SS/F_{ISS}$  river-flow lags skew-surge +3 days: Wellington

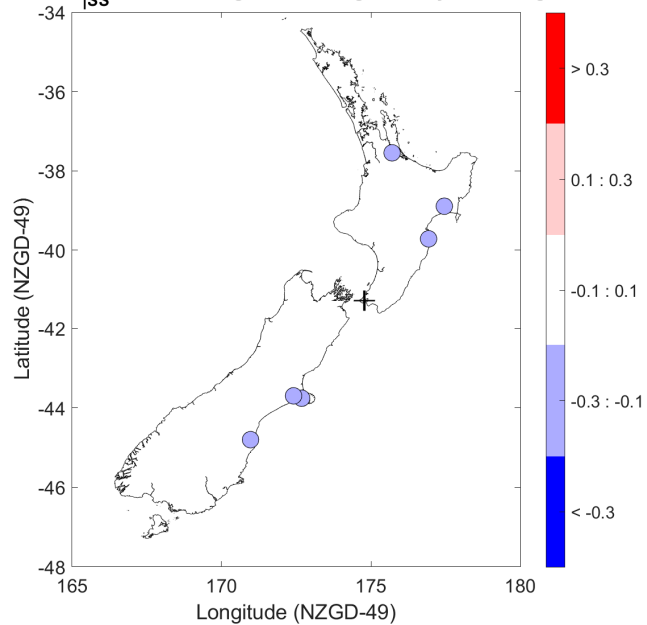

$\tau$ :  $SS/F_{ISS}$  river-flow lags skew-surge +4 days: Wellington

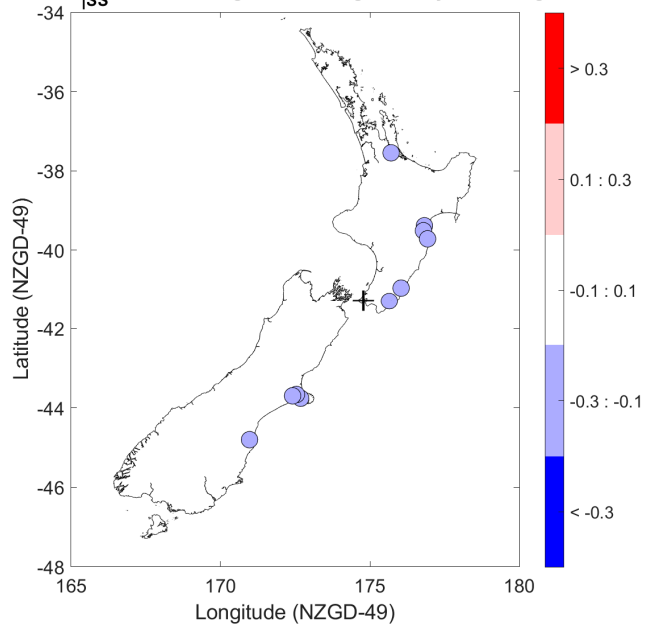

$\tau$ :  $SS/F_{ISS}$  river-flow lags skew-surge +5 days: Wellington

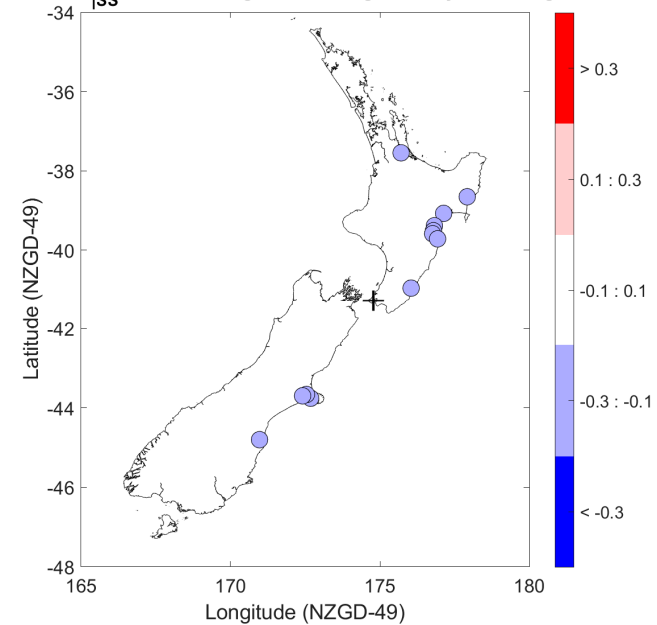

Jackson Bay

$\tau: SS/F_{ss}$  river-flow precedes skew-surge 5 days: JacksonBay

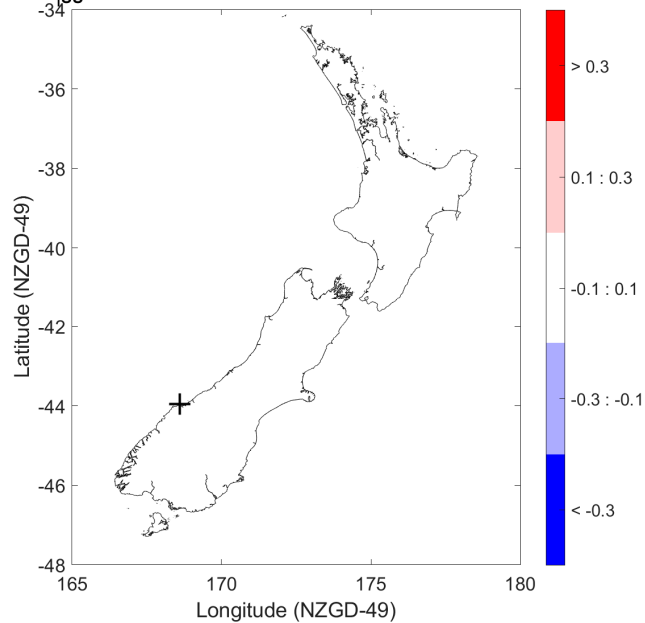

$\tau: SS/F_{ss}$  river-flow precedes skew-surge 4 days: JacksonBay

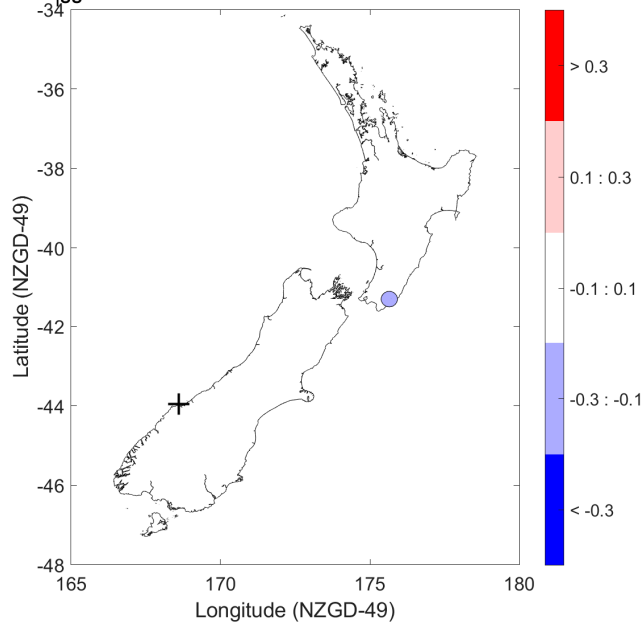

$\tau: SS/F_{ss}$  river-flow precedes skew-surge 3 days: JacksonBay

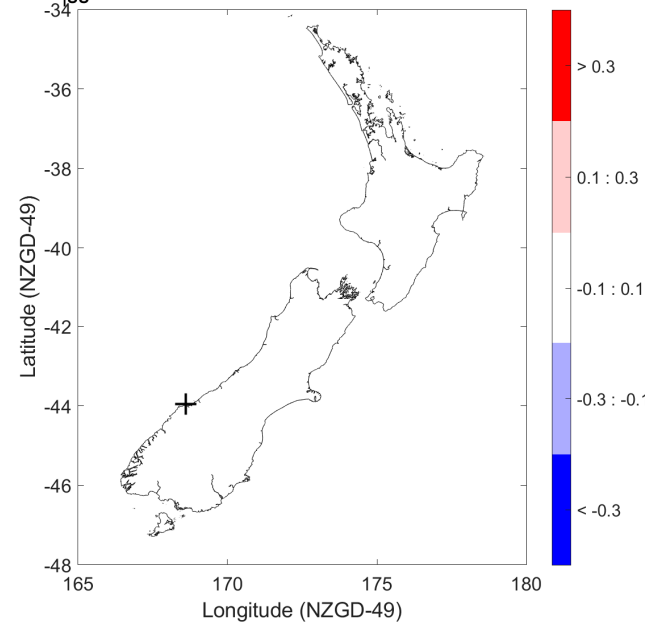

$\tau: SS/F_{ss}$  river-flow precedes skew-surge 2 days: JacksonBay

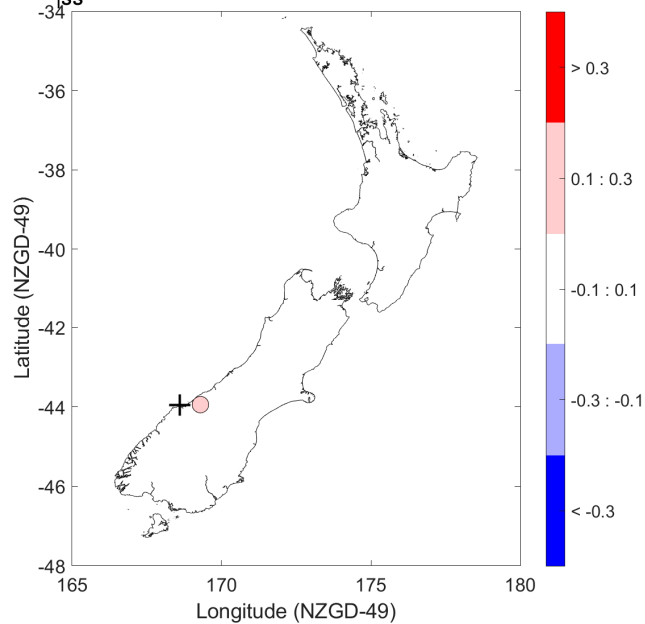

$\tau: SS/F_{ss}$  river-flow precedes skew-surge 1 days: JacksonBay

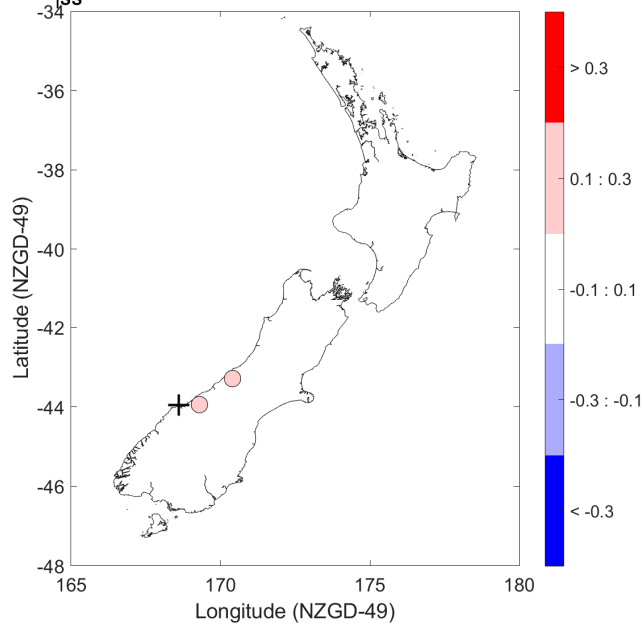

$\tau: SS/F_{ss}$  peak river-flow same day as skew-surge: JacksonBay

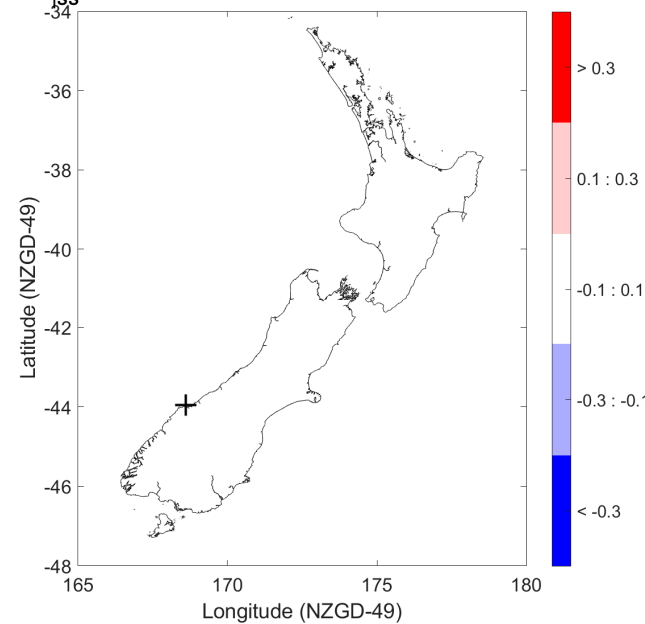



$\tau: SS/F_{SS}$  river-flow  $\pm 1$  days of skew-surge: JacksonBay

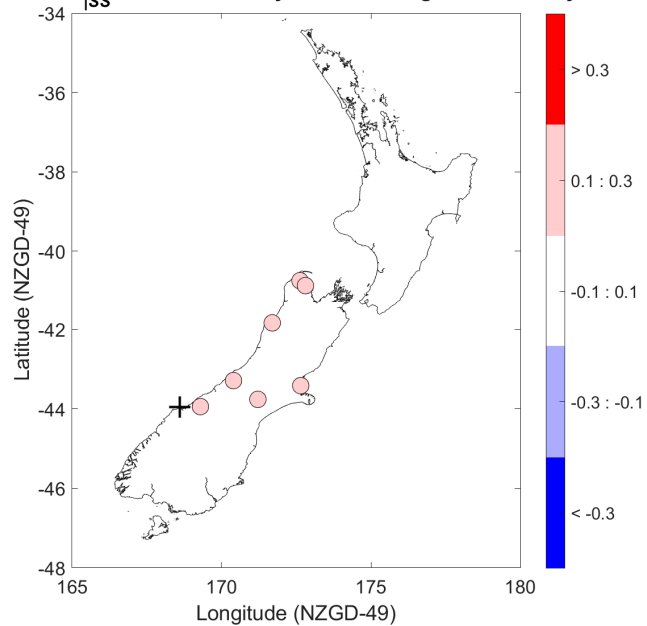

$\tau: SS/F_{SS}$  river-flow lags skew-surge +1 days: JacksonBay

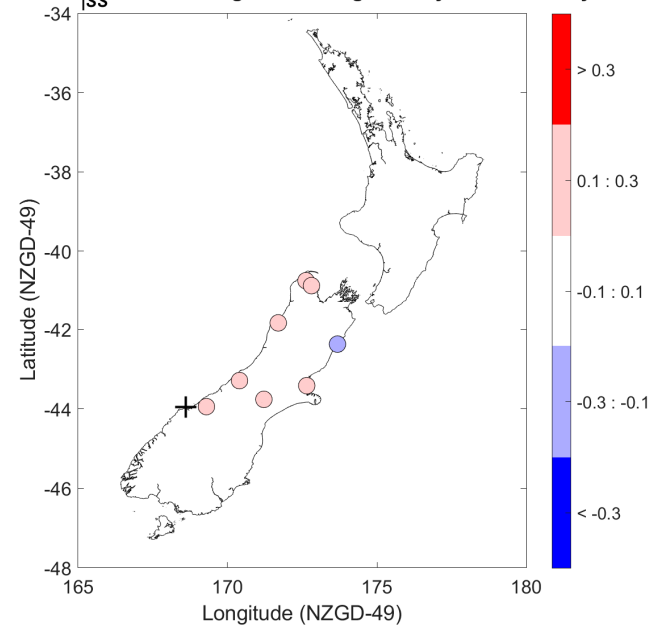

$\tau: SS/F_{SS}$  river-flow lags skew-surge +2 days: JacksonBay

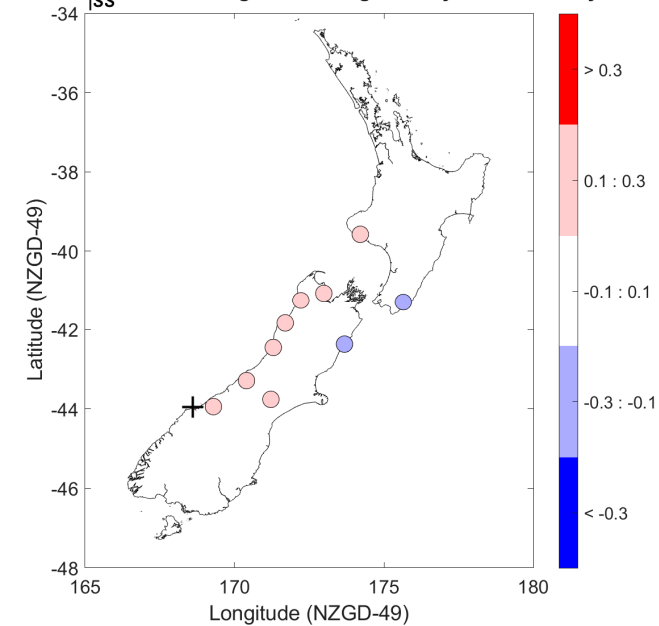

$\tau: SS/F_{SS}$  river-flow lags skew-surge +3 days: JacksonBay

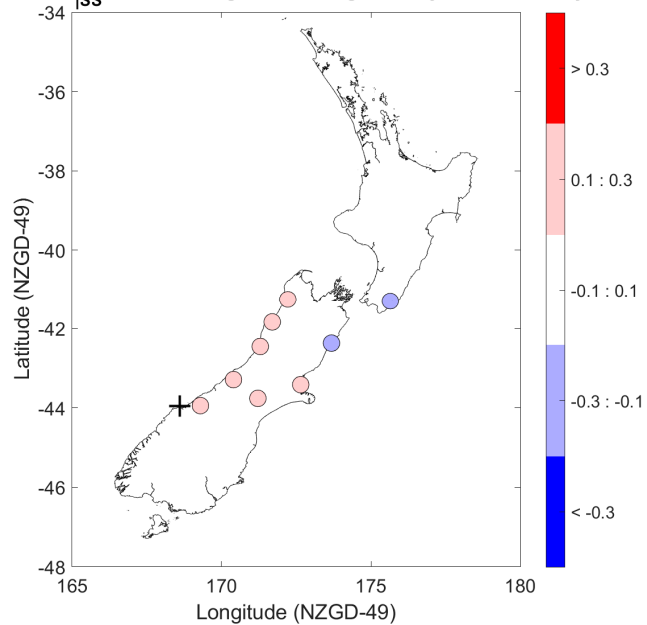

$\tau: SS/F_{SS}$  river-flow lags skew-surge +4 days: JacksonBay

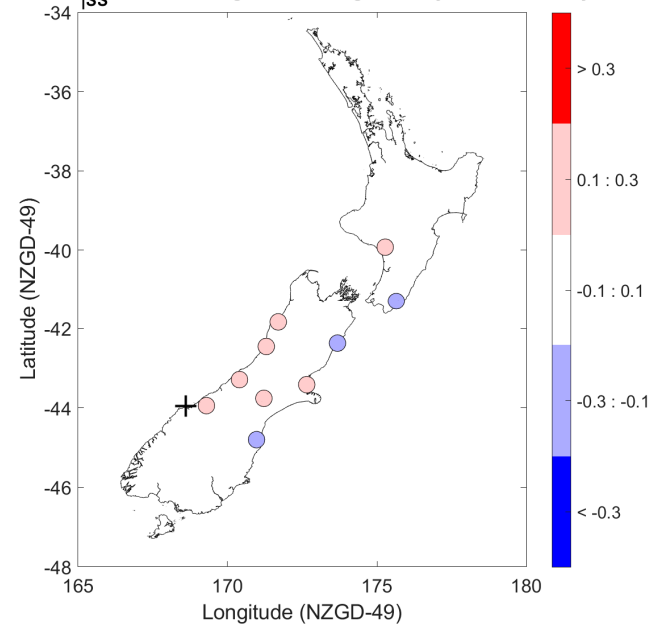

$\tau: SS/F_{SS}$  river-flow lags skew-surge +5 days: JacksonBay

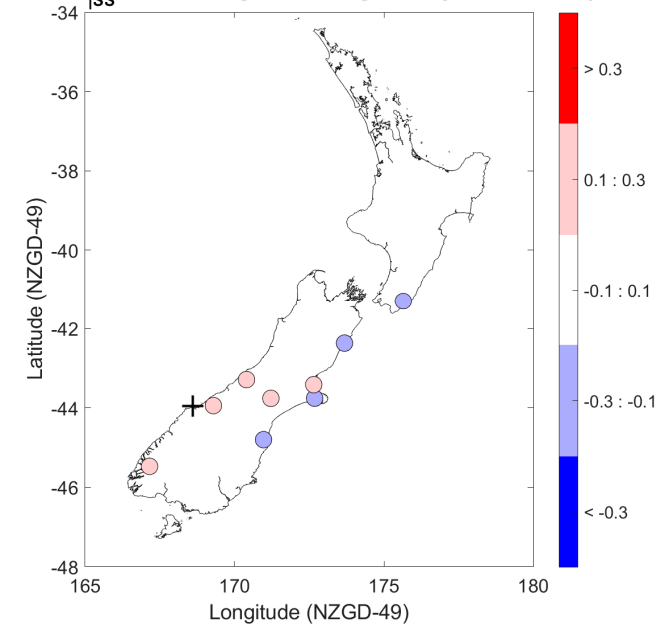

Lyttelton

$\tau: SS/F_{SS}$  river-flow precedes skew-surge 5 days: Lyttelton

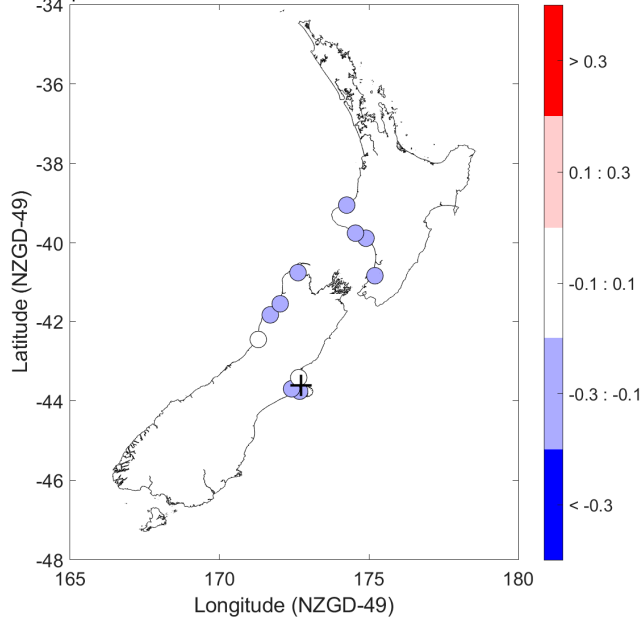

$\tau: SS/F_{SS}$  river-flow precedes skew-surge 4 days: Lyttelton

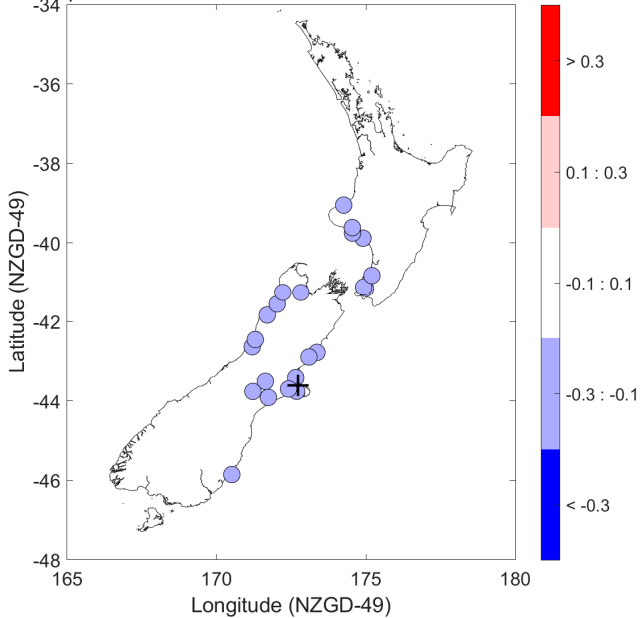

$\tau: SS/F_{SS}$  river-flow precedes skew-surge 3 days: Lyttelton

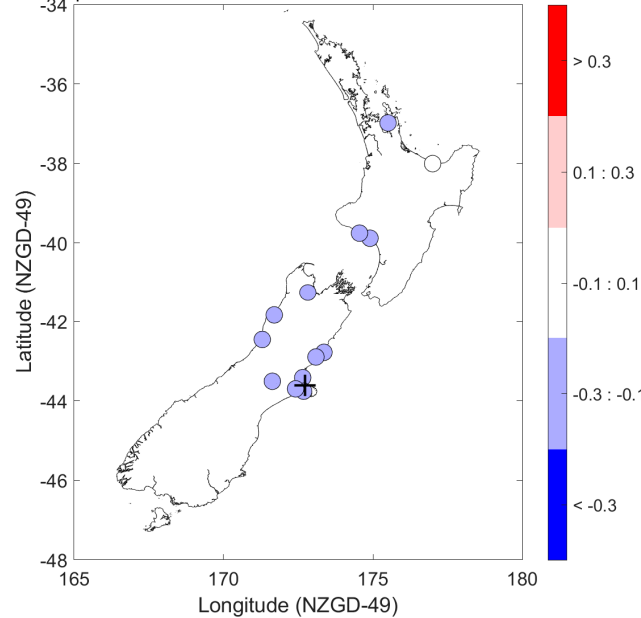

$\tau: SS/F_{SS}$  river-flow precedes skew-surge 2 days: Lyttelton

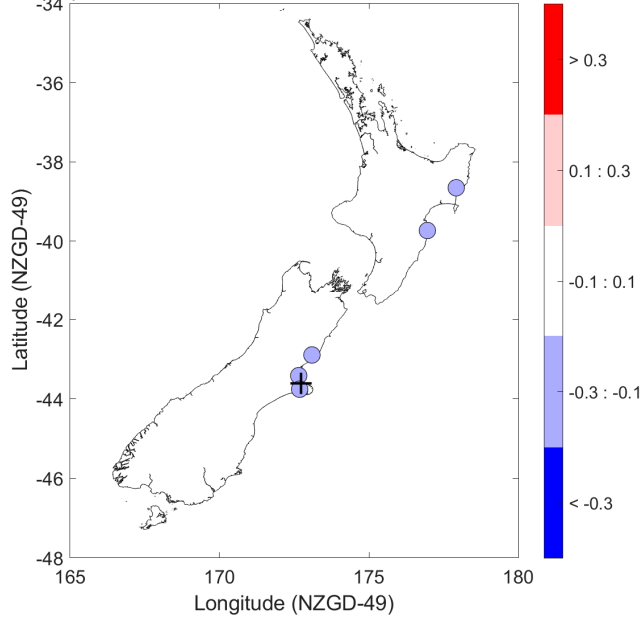

$\tau: SS/F_{SS}$  river-flow precedes skew-surge 1 days: Lyttelton

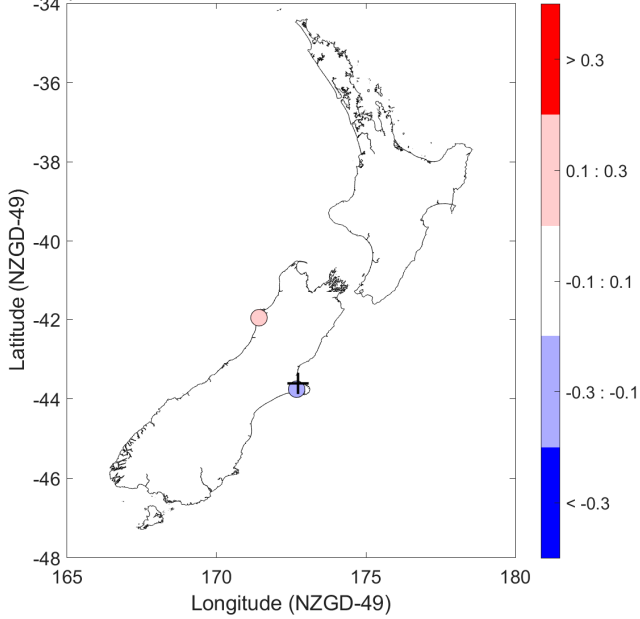

$\tau: SS/F_{SS}$  peak river-flow same day as skew-surge: Lyttelton

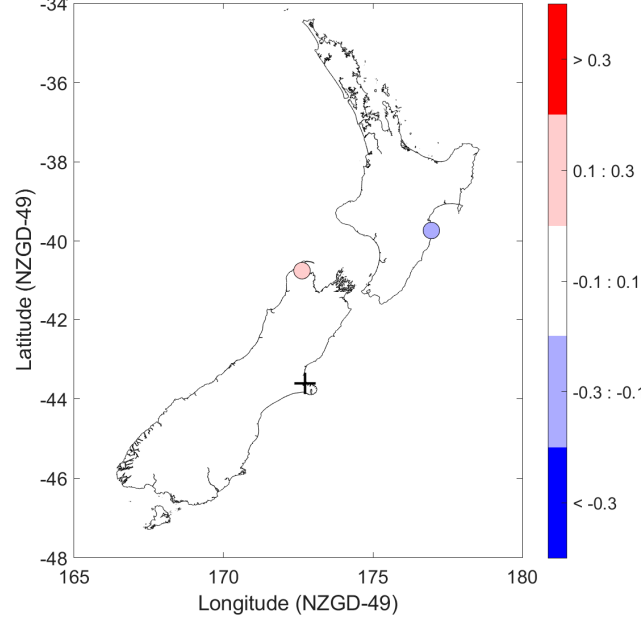

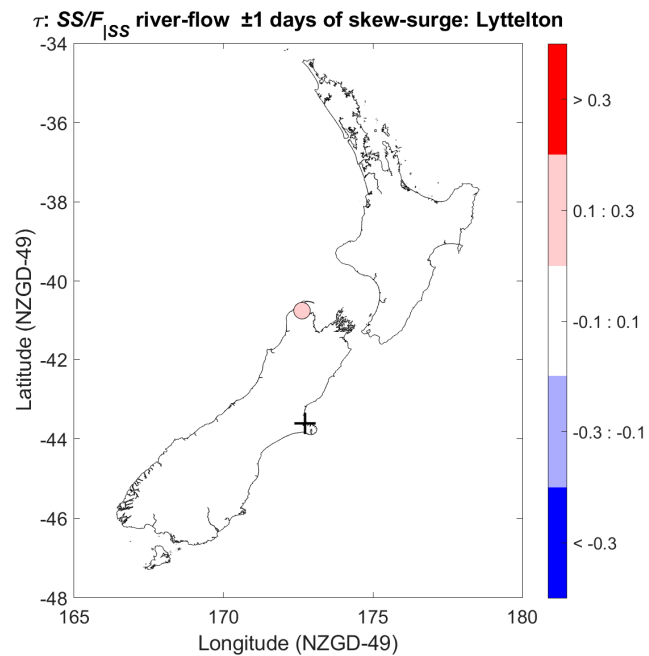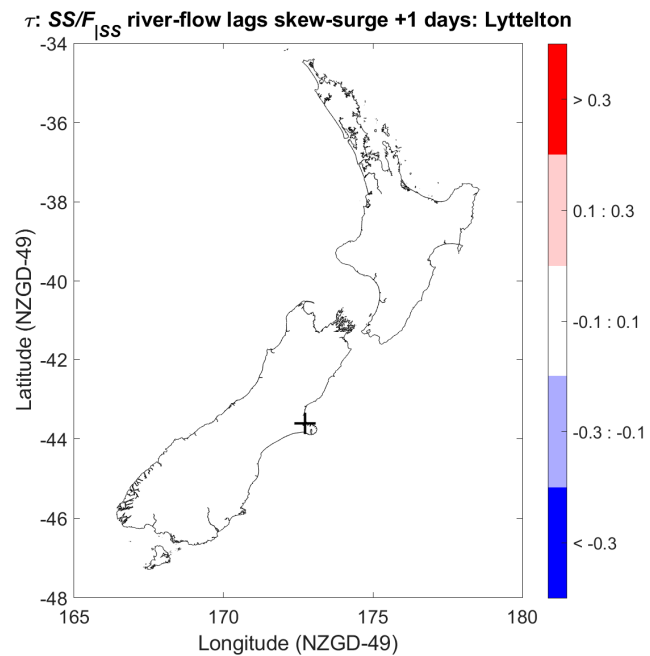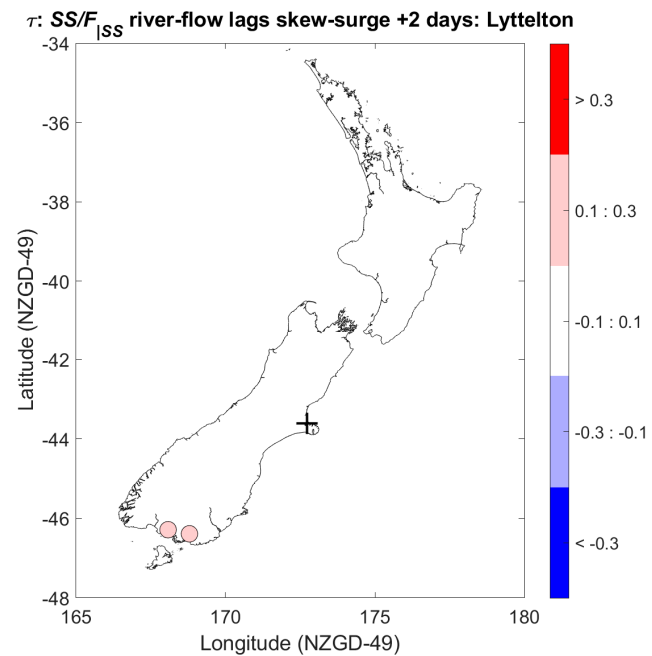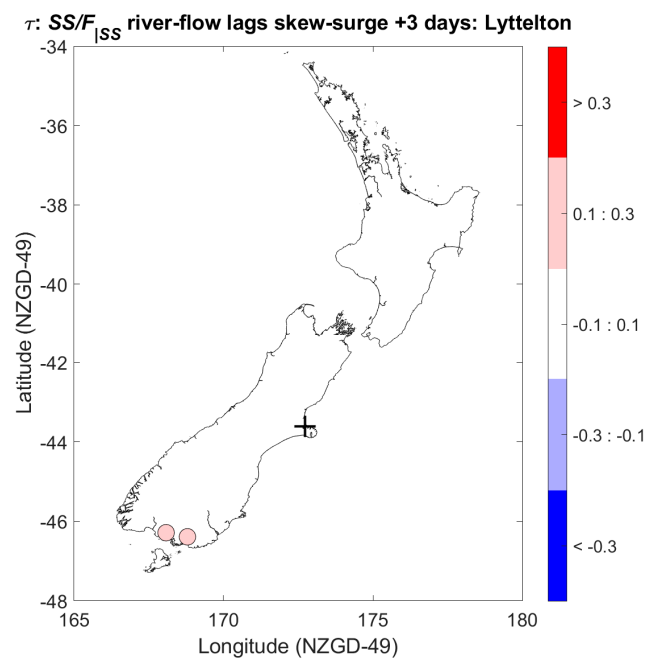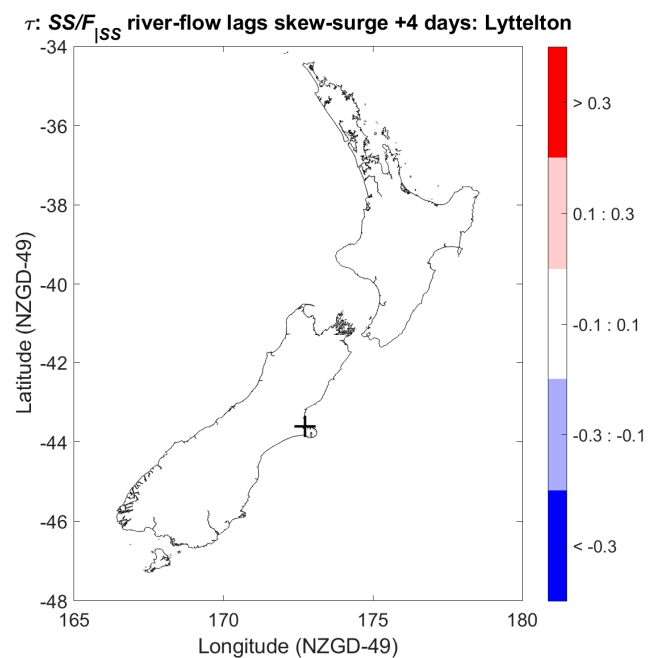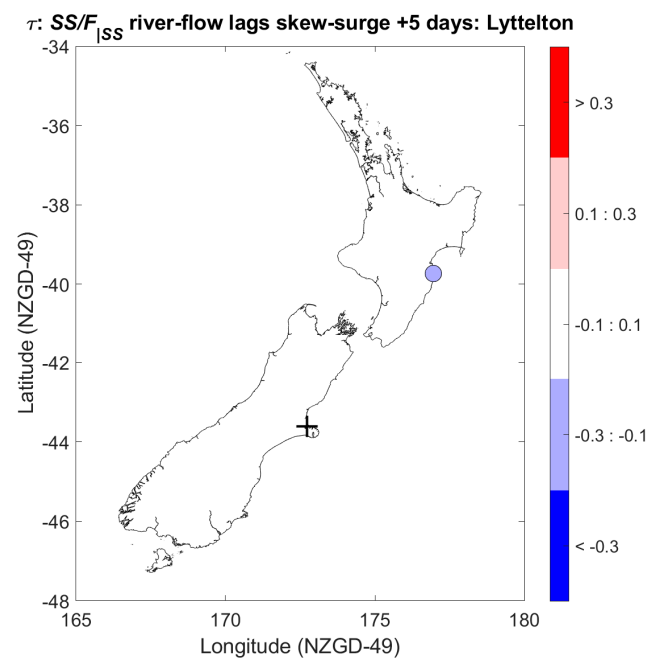

Dunedin

$\tau: SS/F_{ISS}$  river-flow precedes skew-surge 5 days: Dunedin

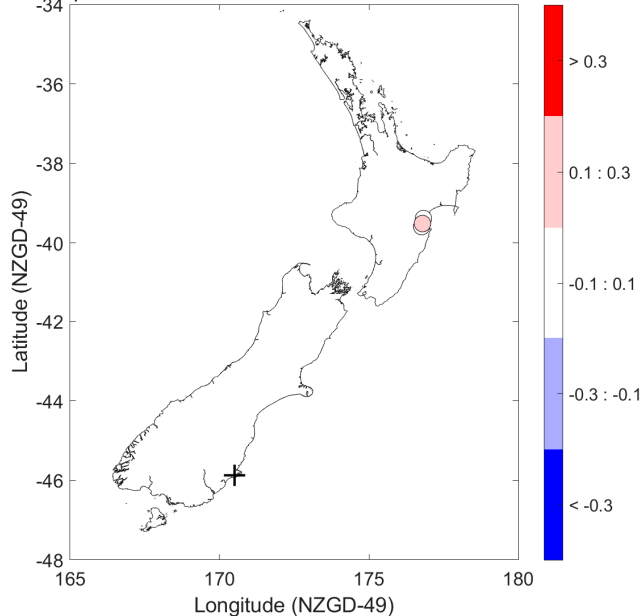

$\tau: SS/F_{ISS}$  river-flow precedes skew-surge 4 days: Dunedin

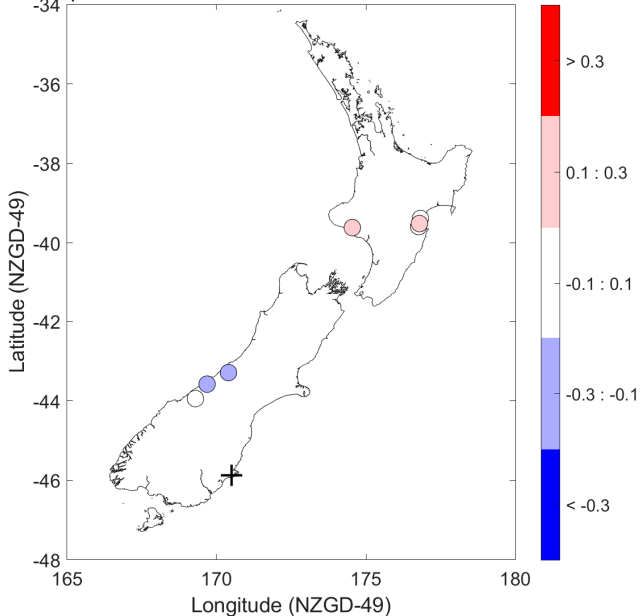

$\tau: SS/F_{ISS}$  river-flow precedes skew-surge 3 days: Dunedin

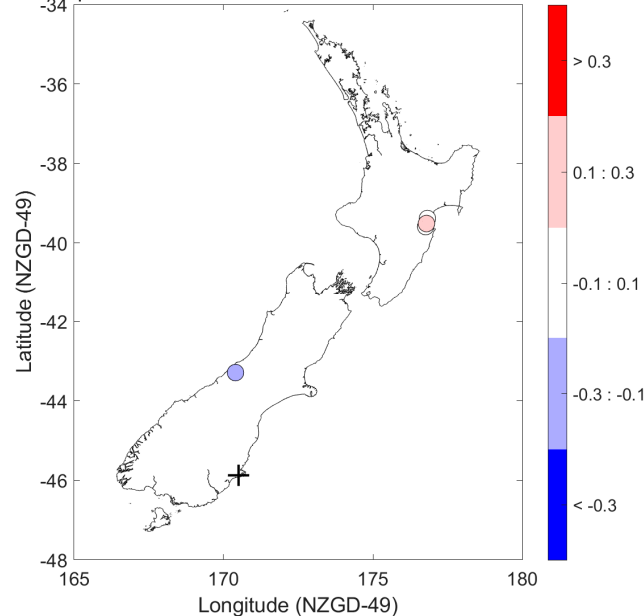

$\tau: SS/F_{ISS}$  river-flow precedes skew-surge 2 days: Dunedin

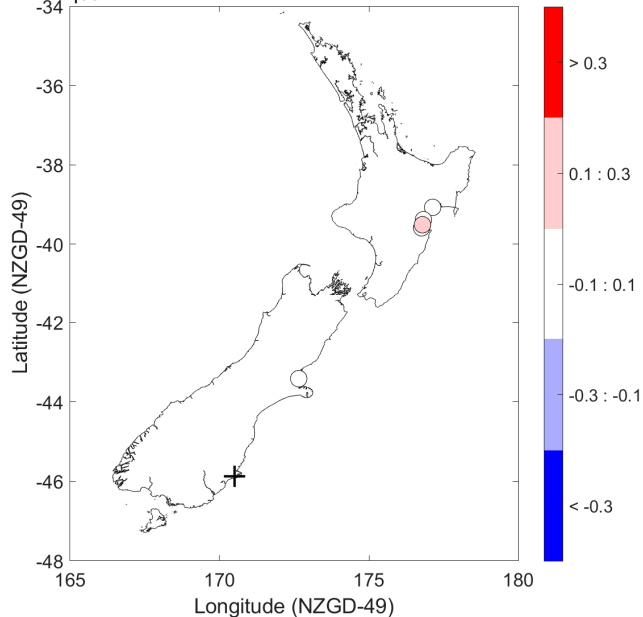

$\tau: SS/F_{ISS}$  river-flow precedes skew-surge 1 days: Dunedin

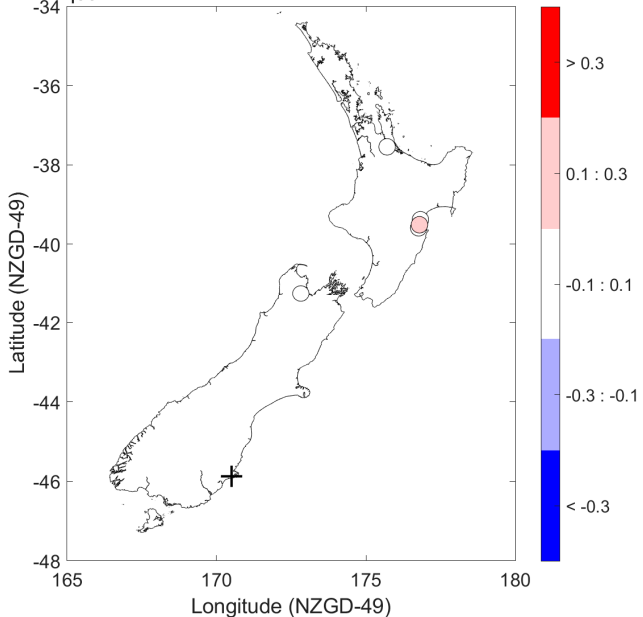

$\tau: SS/F_{ISS}$  peak river-flow same day as skew-surge: Dunedin

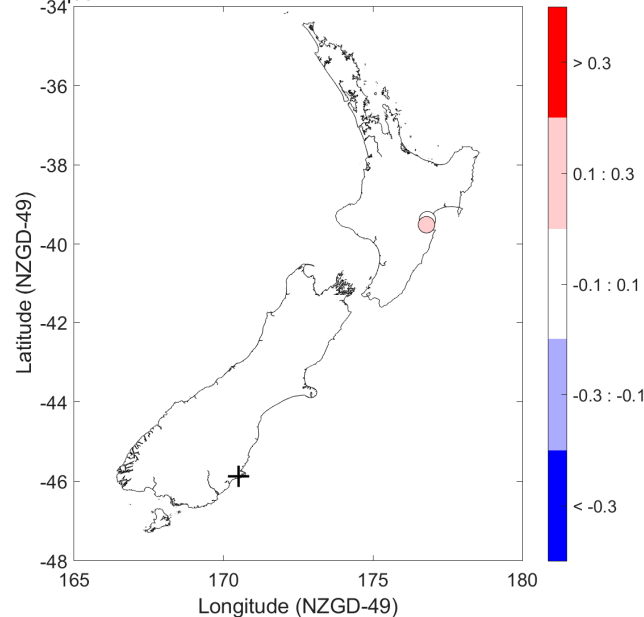

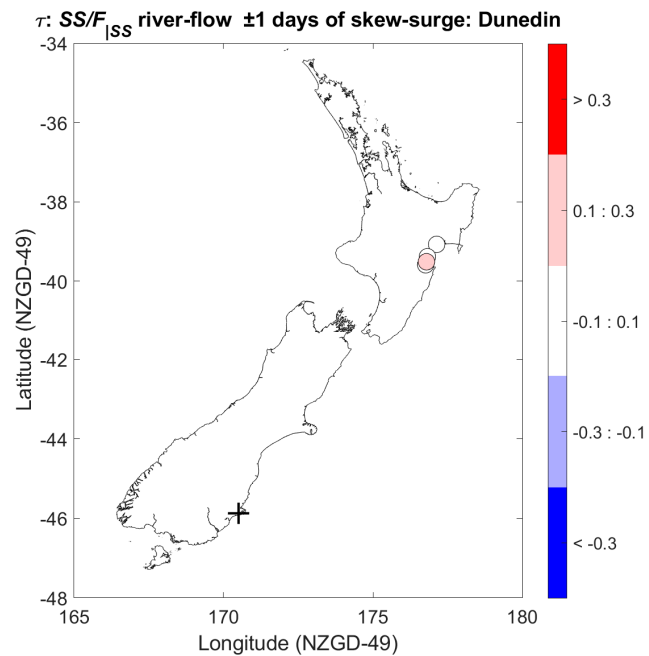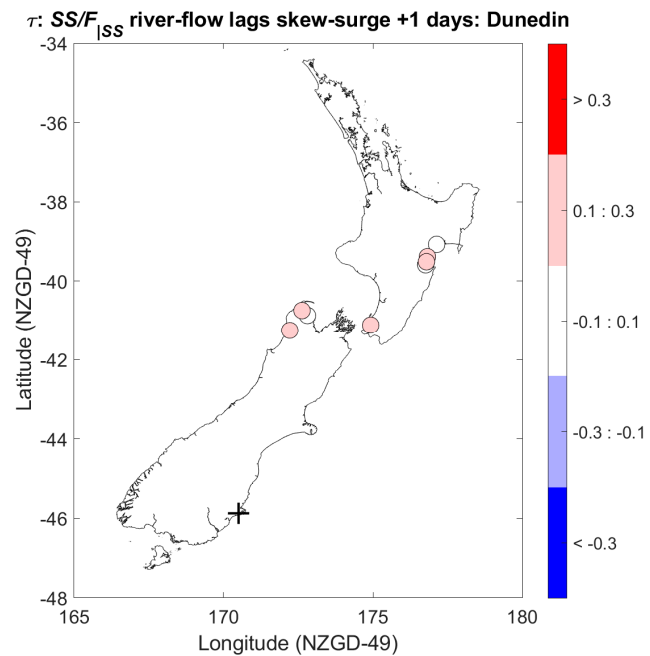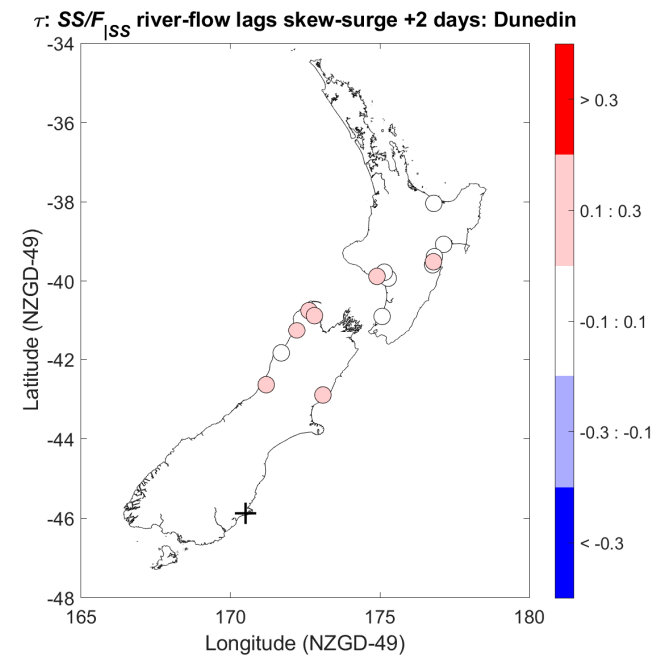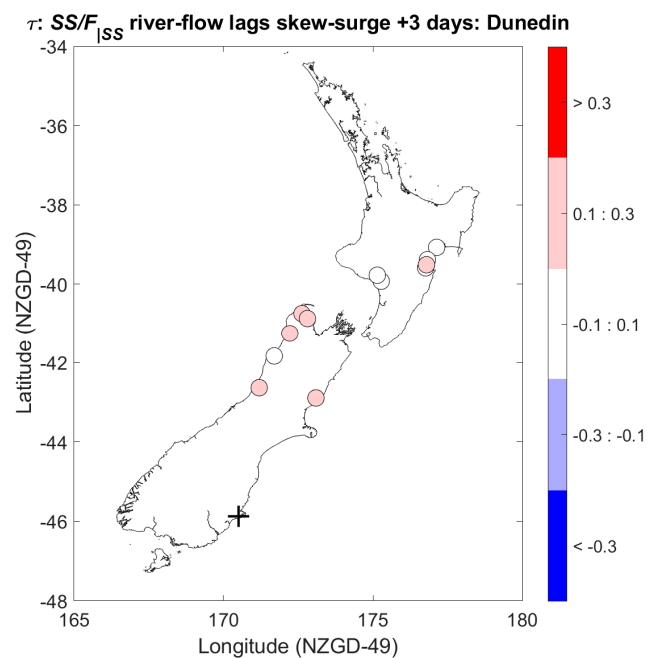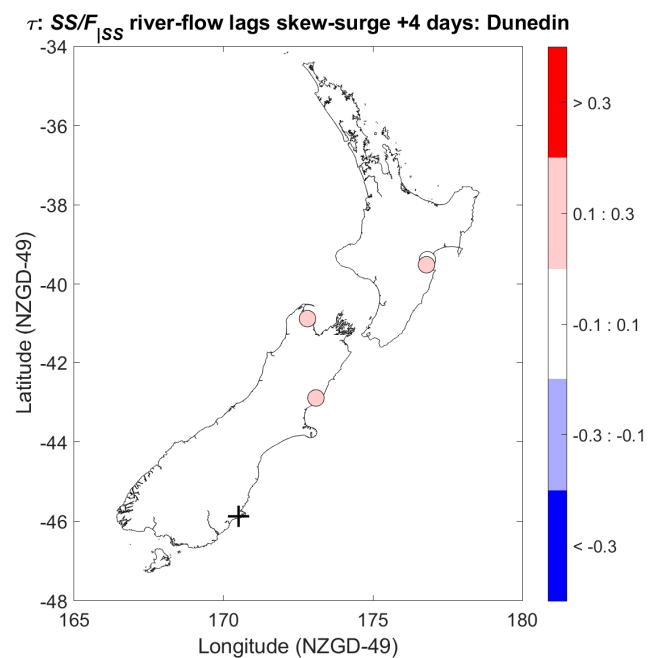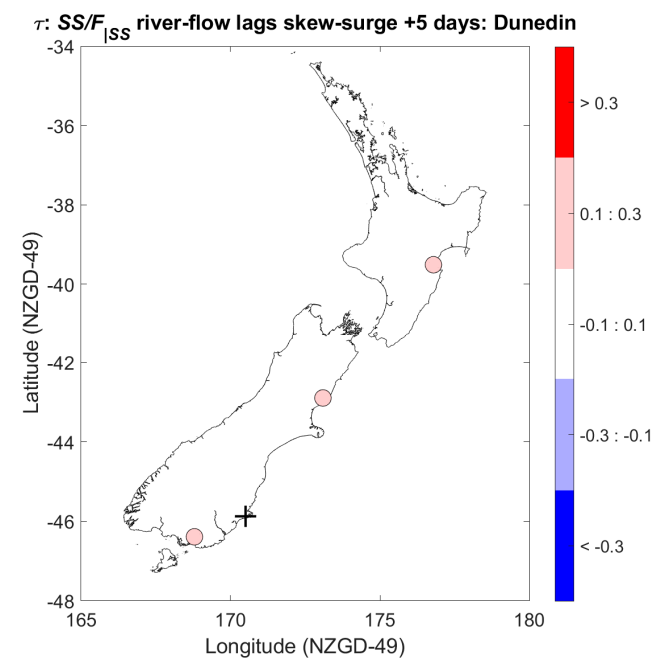

Dog Island

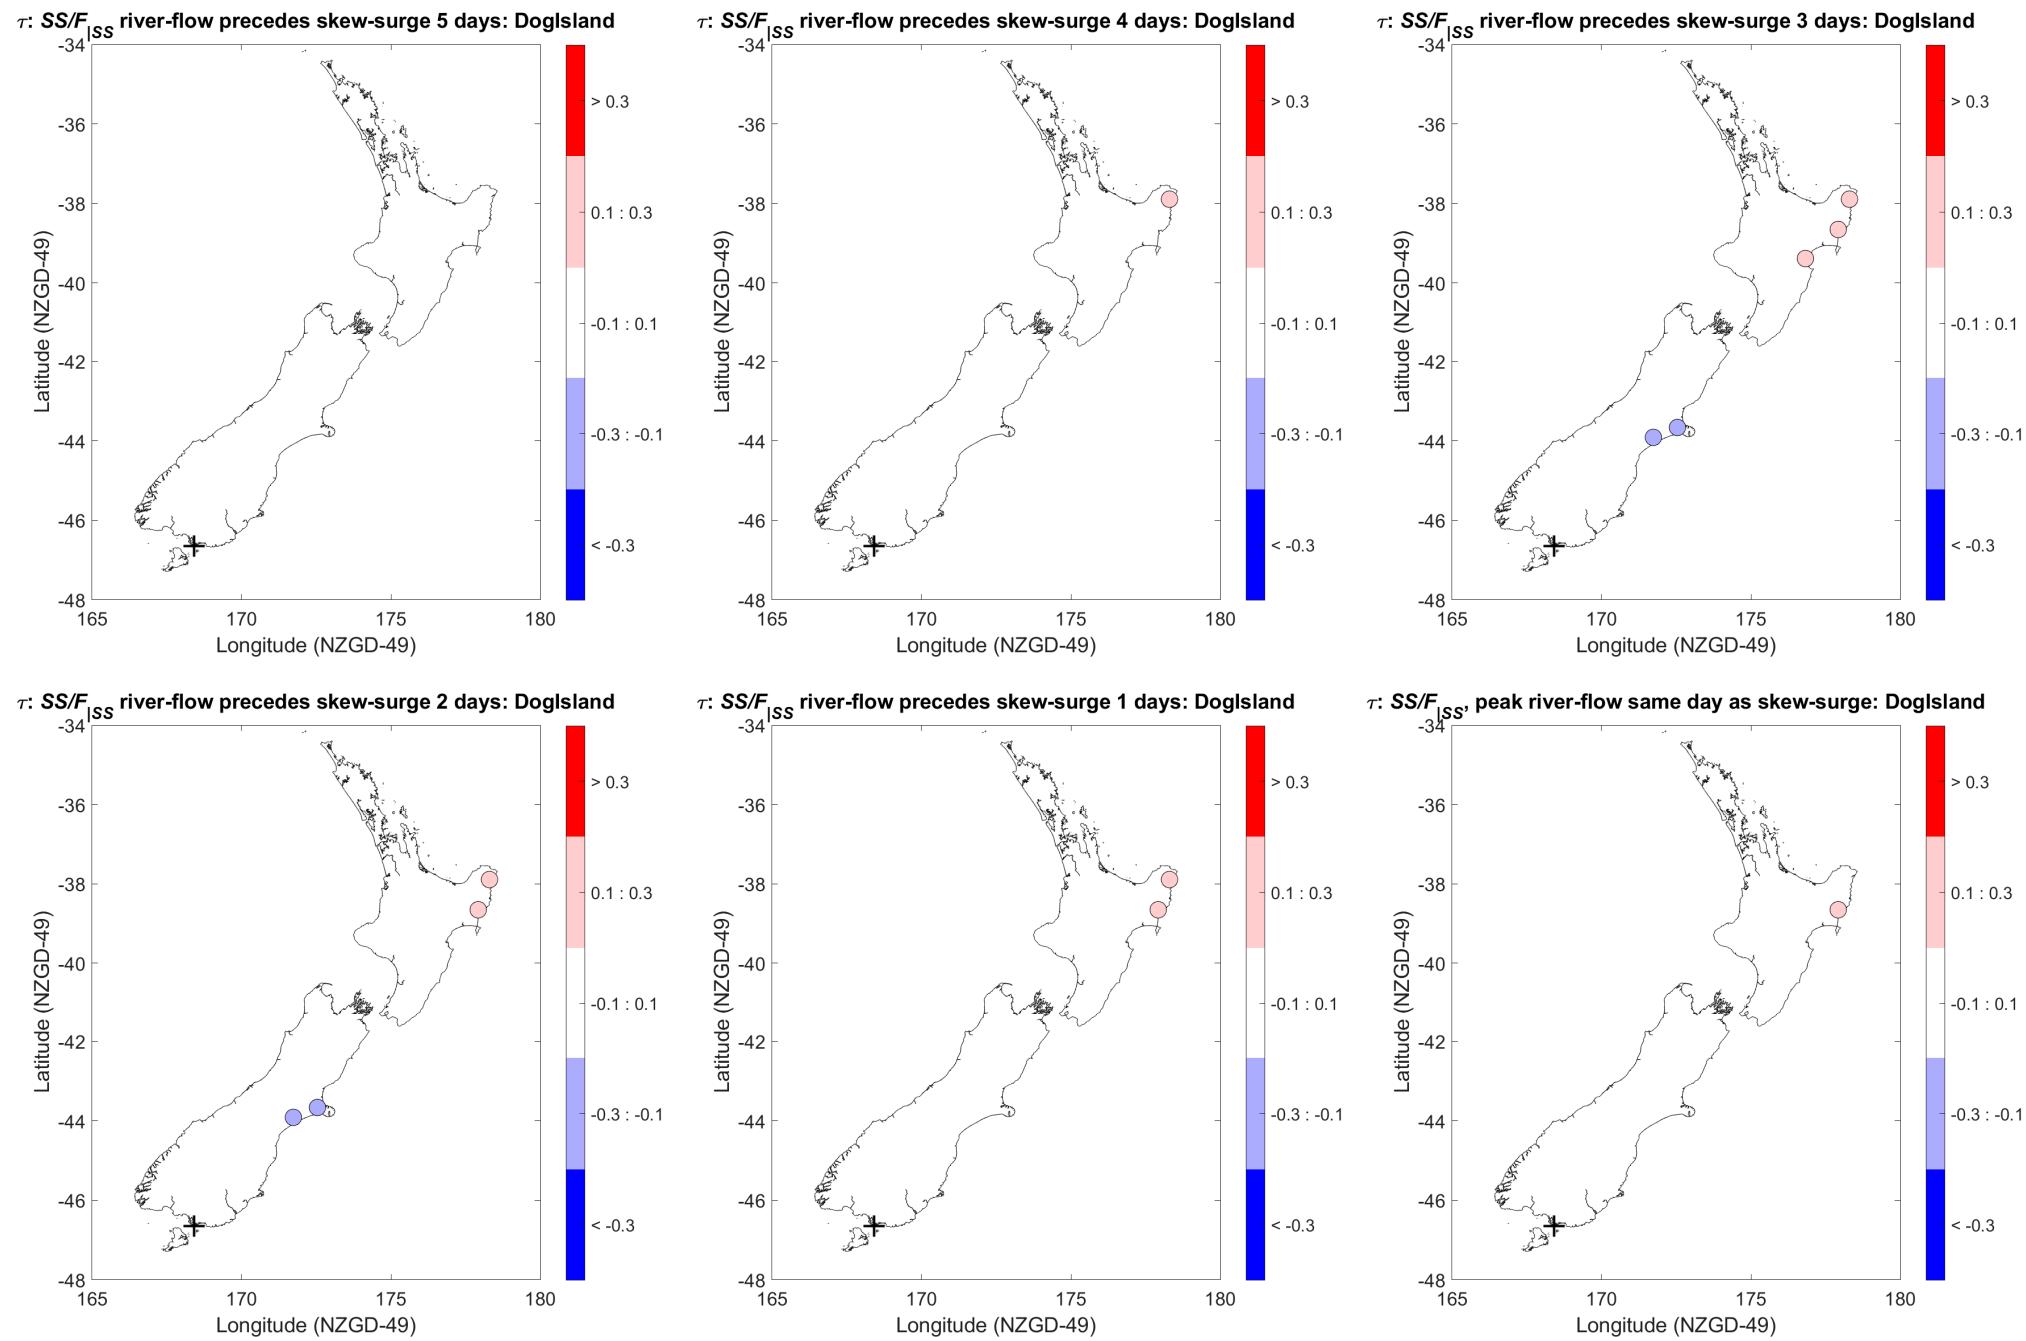

$\tau$ :  $SS/F_{ISS}$  river-flow  $\pm 1$  days of skew-surge: DogIsland

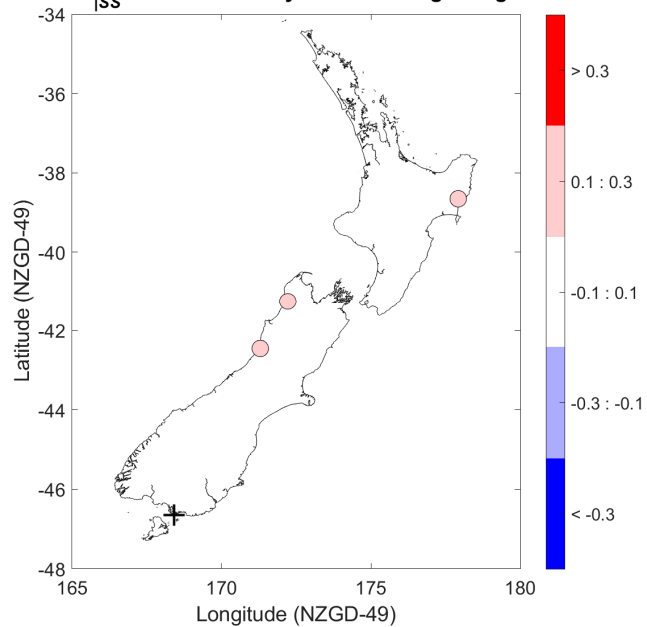

$\tau$ :  $SS/F_{ISS}$  river-flow lags skew-surge +1 days: DogIsland

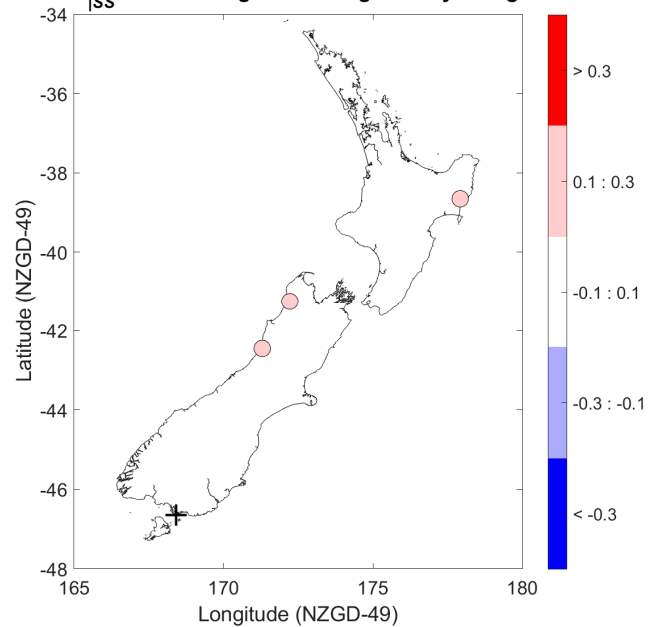

$\tau$ :  $SS/F_{ISS}$  river-flow lags skew-surge +2 days: DogIsland

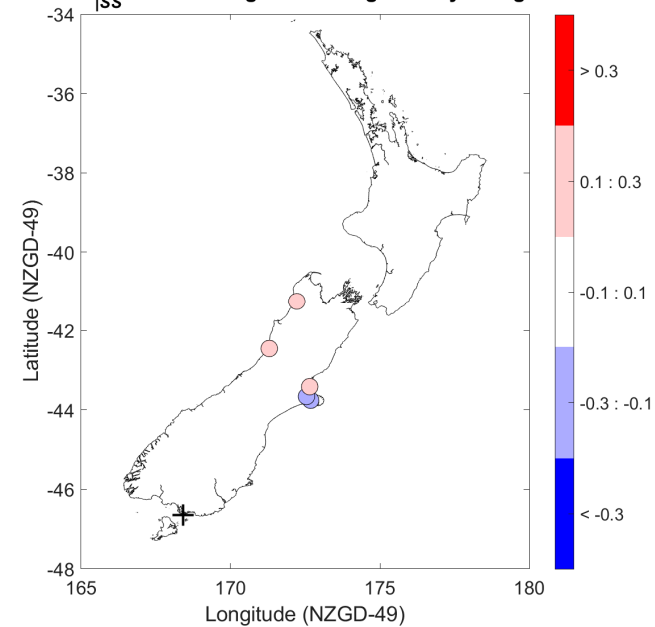

$\tau$ :  $SS/F_{ISS}$  river-flow lags skew-surge +3 days: DogIsland

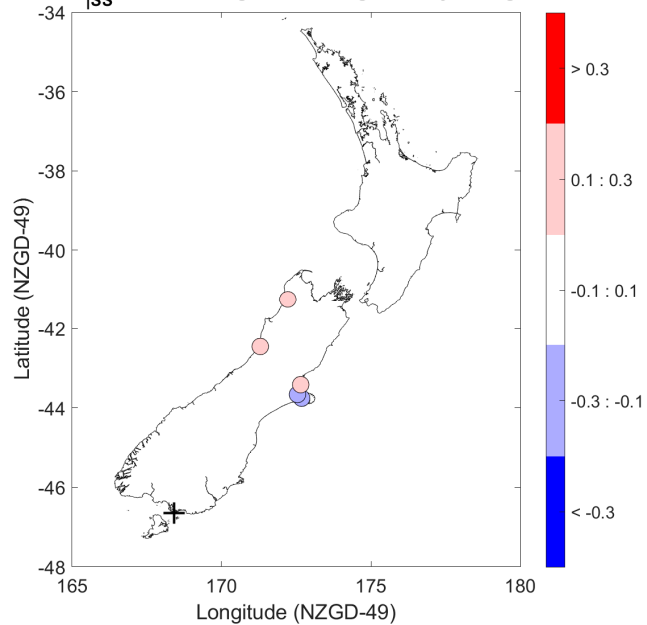

$\tau$ :  $SS/F_{ISS}$  river-flow lags skew-surge +4 days: DogIsland

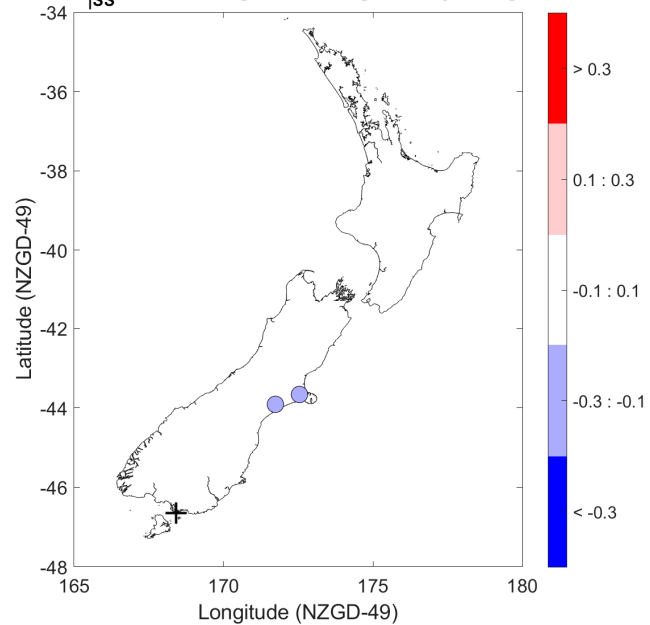

$\tau$ :  $SS/F_{ISS}$  river-flow lags skew-surge +5 days: DogIsland

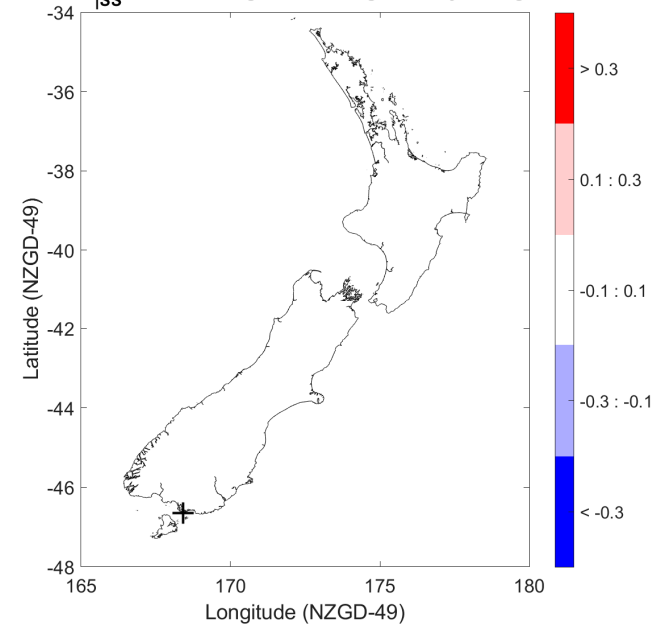

$SS/F_{|F}$ —skew-surge dependent on extreme river-flow

Positive lags mean that the skew-surge was experienced after the river-flow and *vice versa*.



Opua

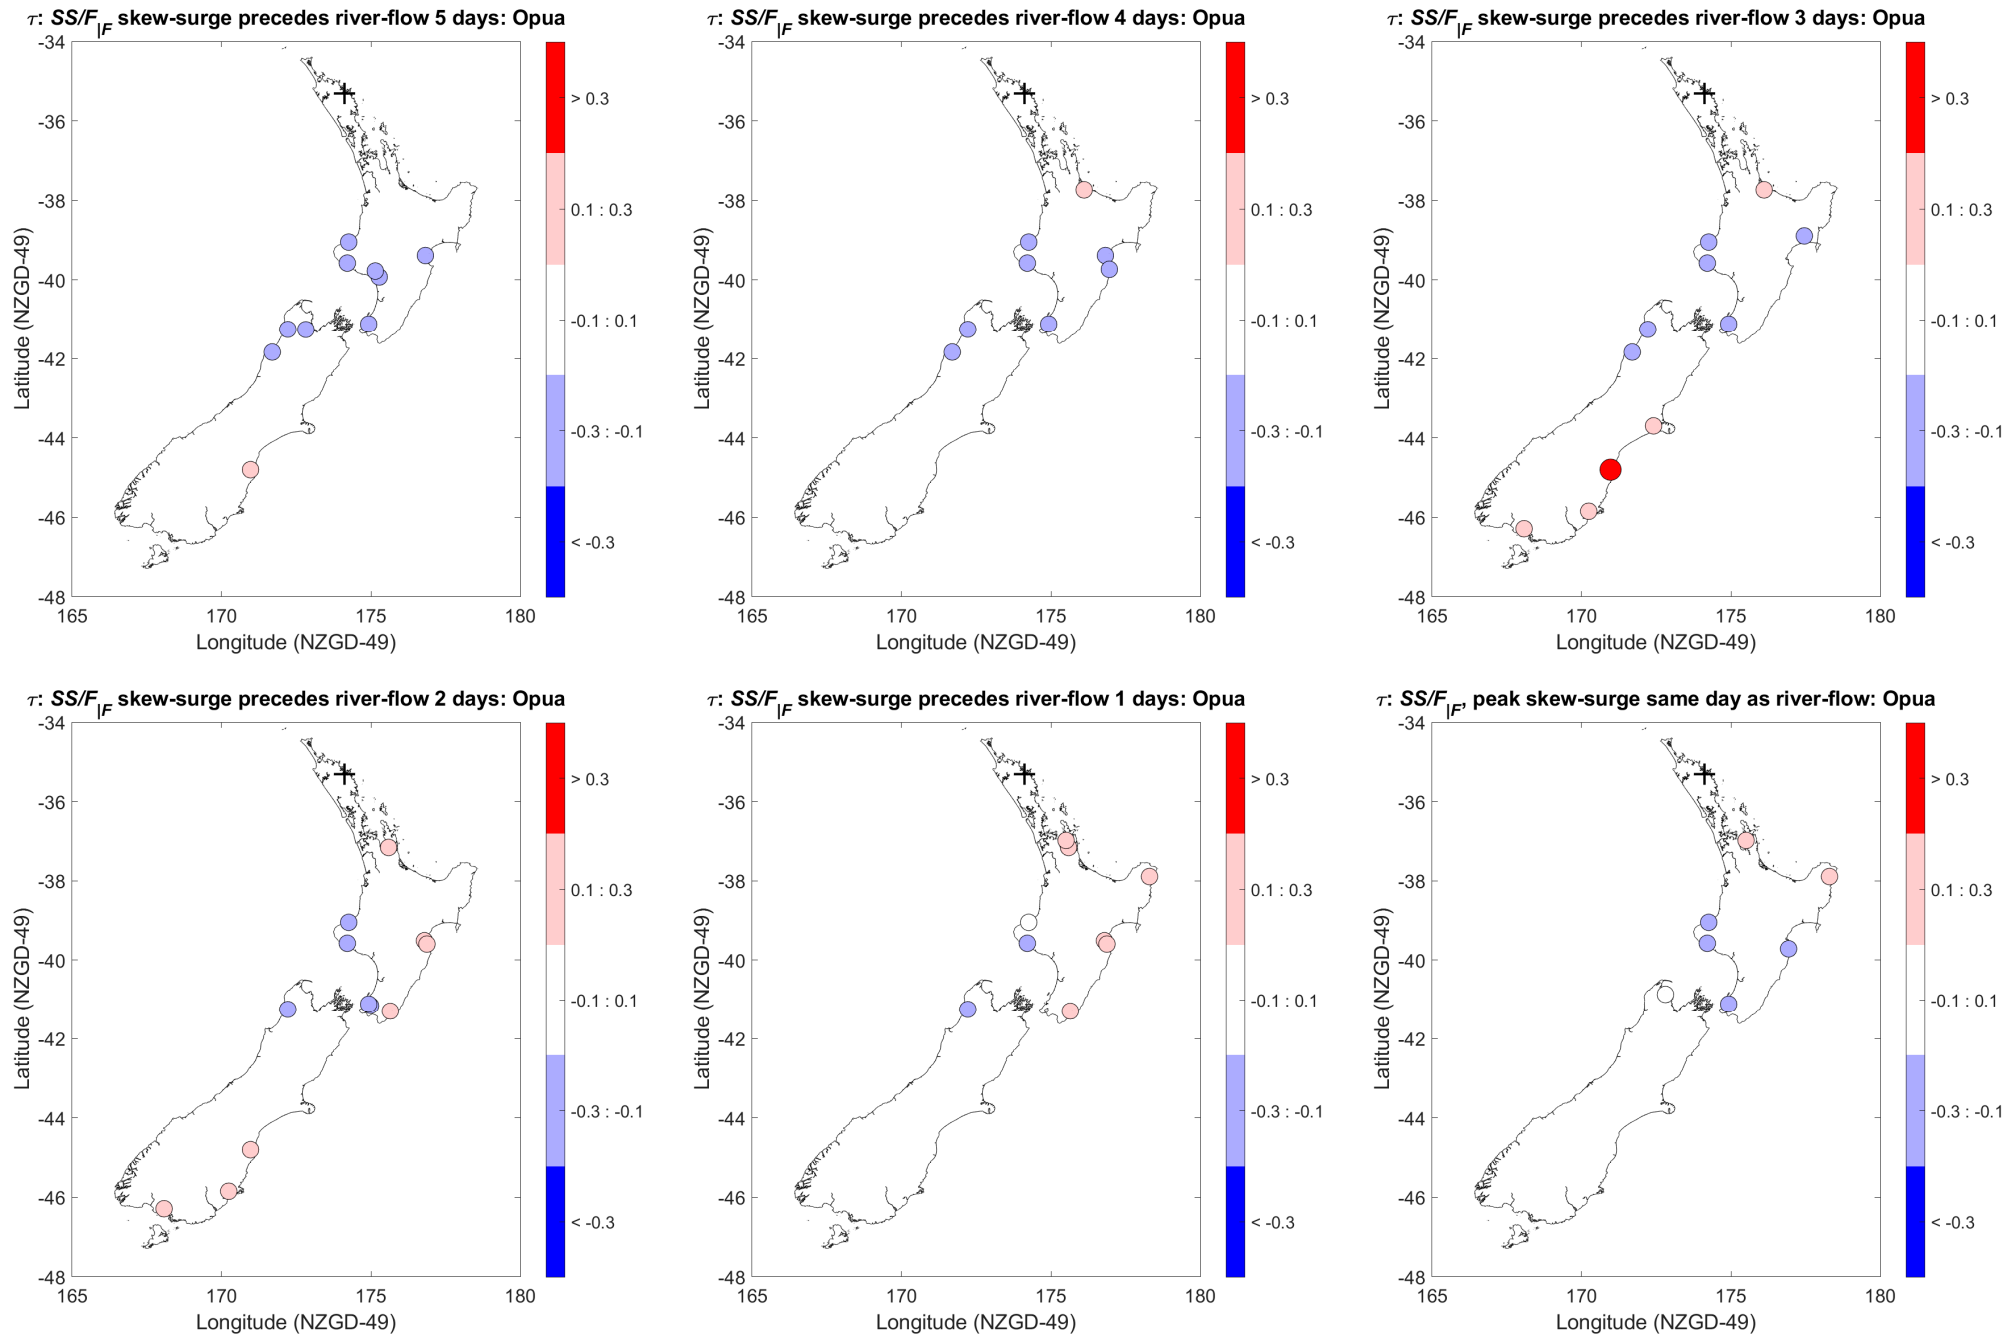

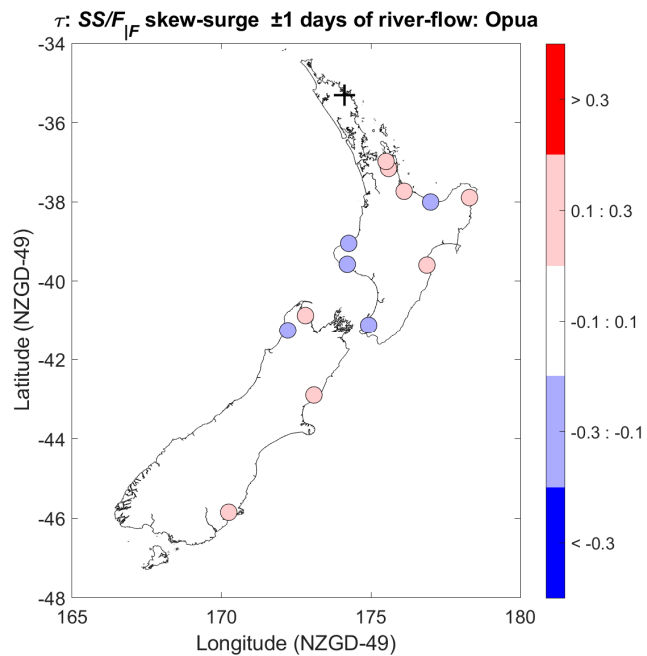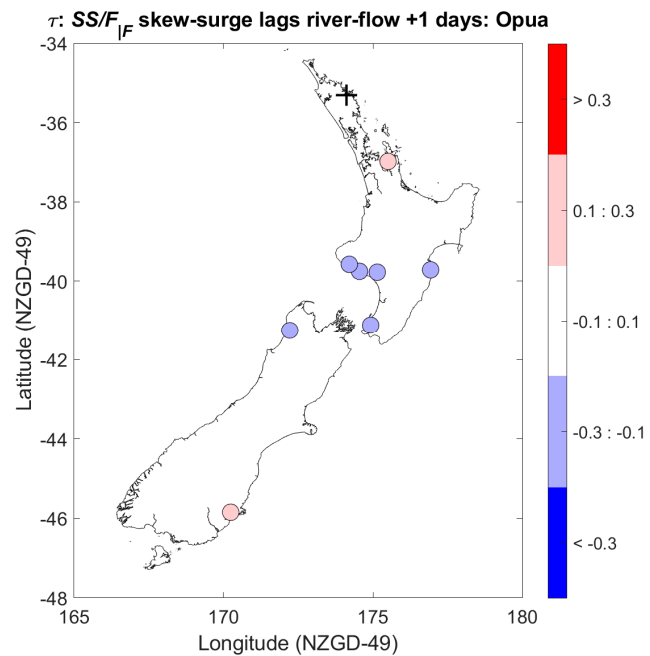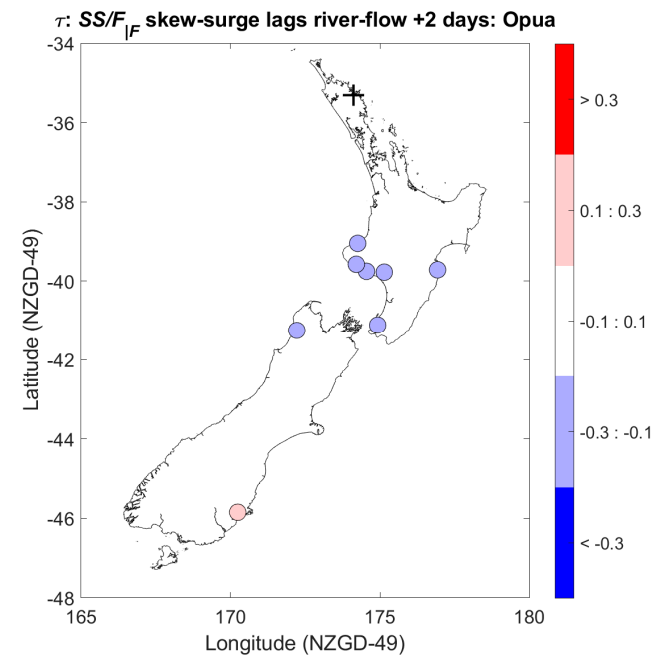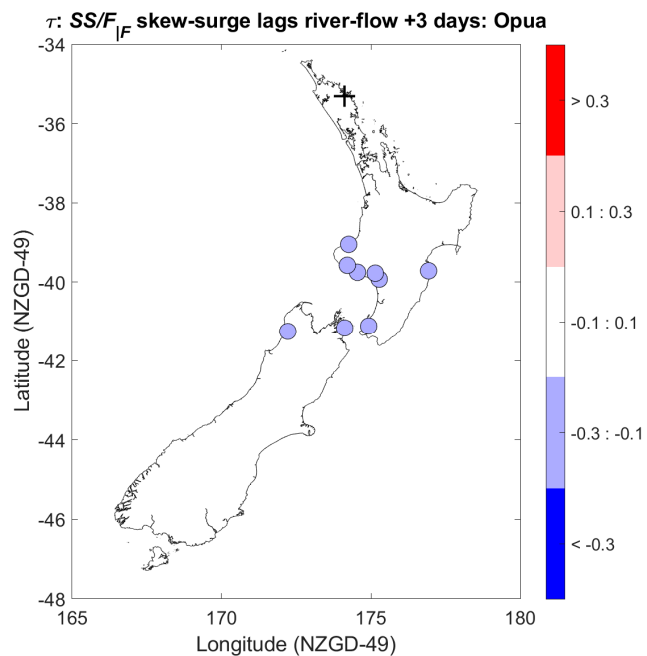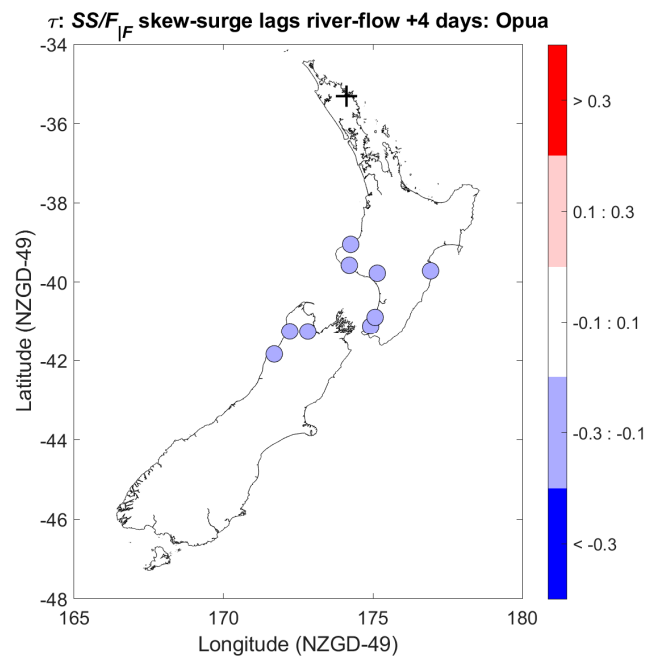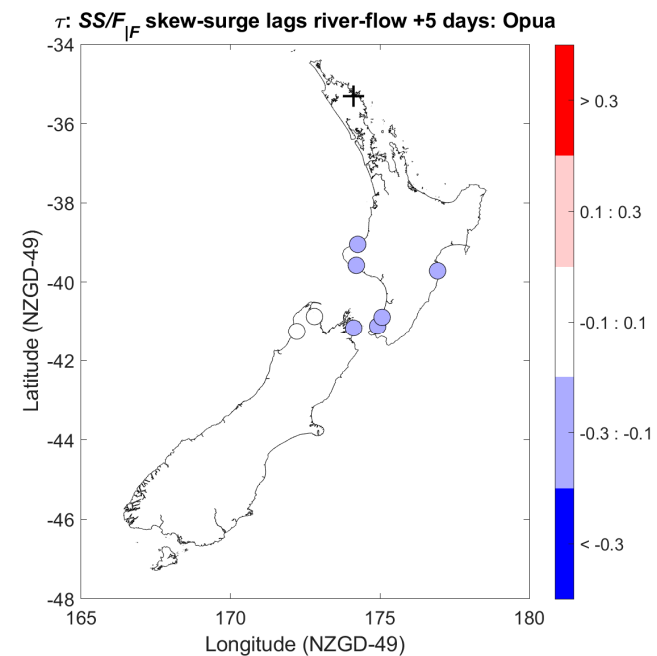

Marsden Point

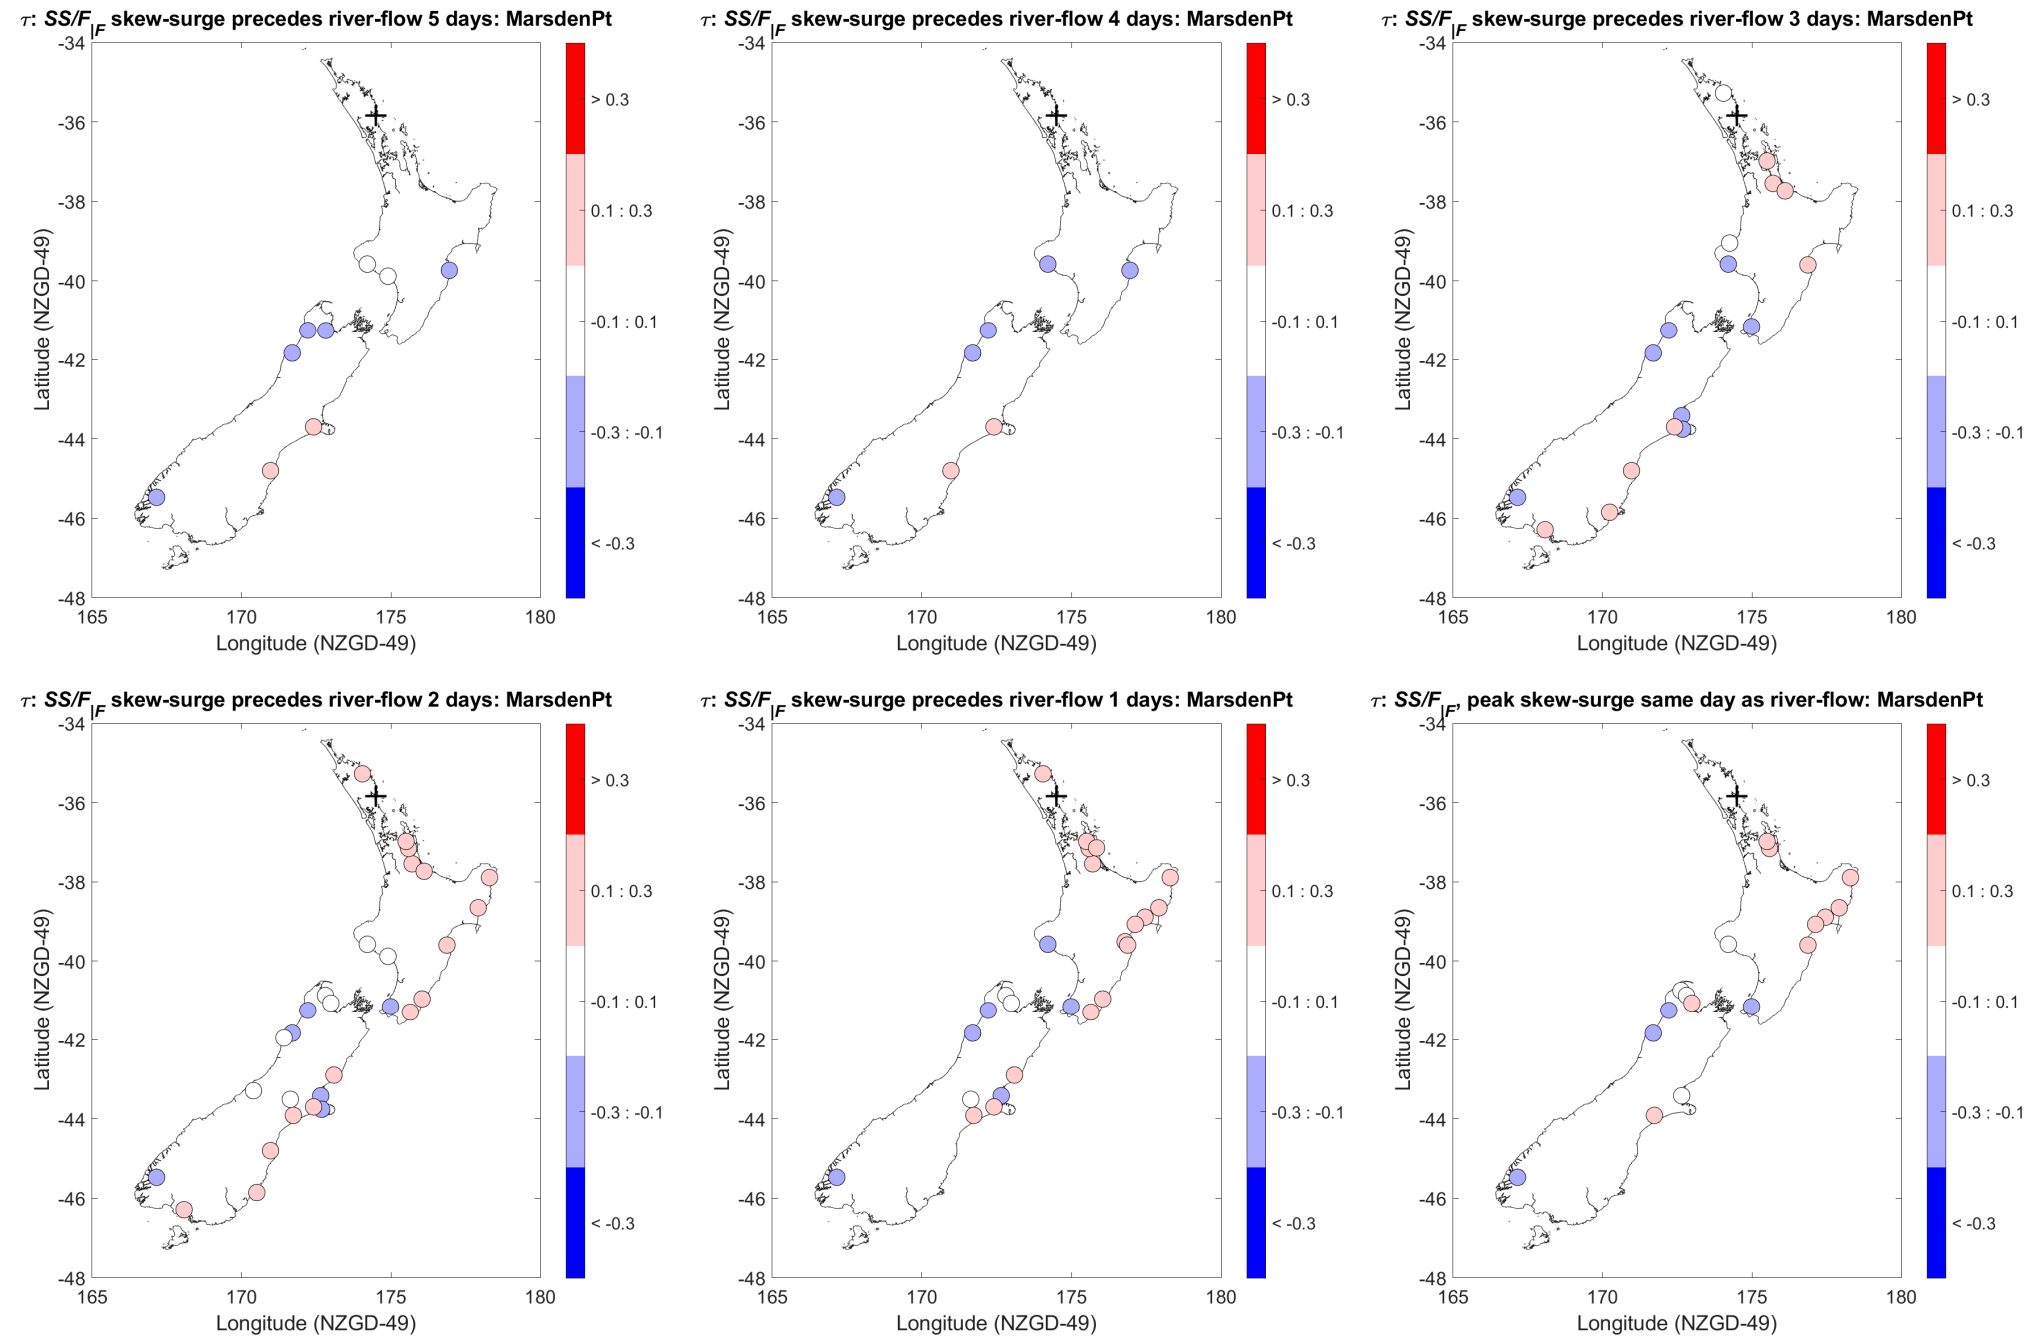

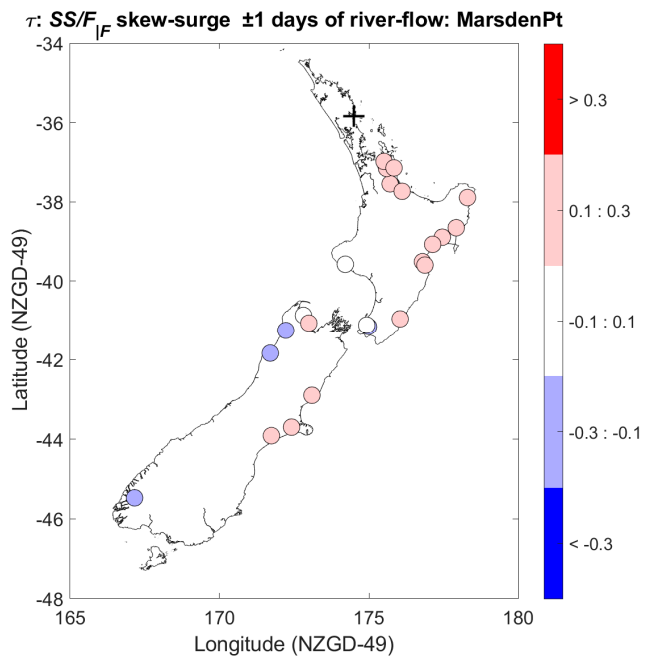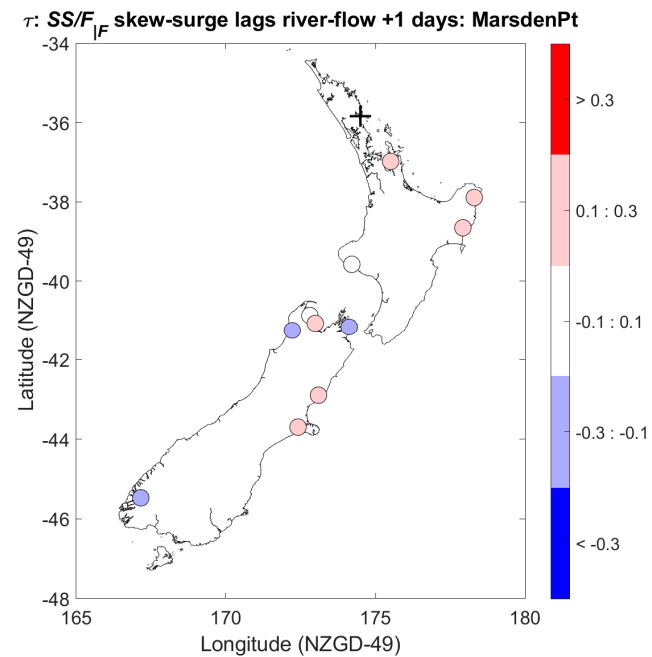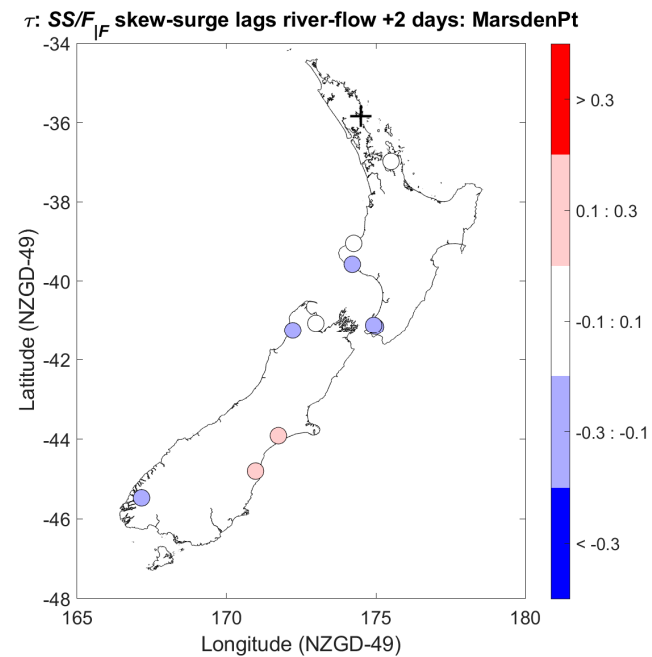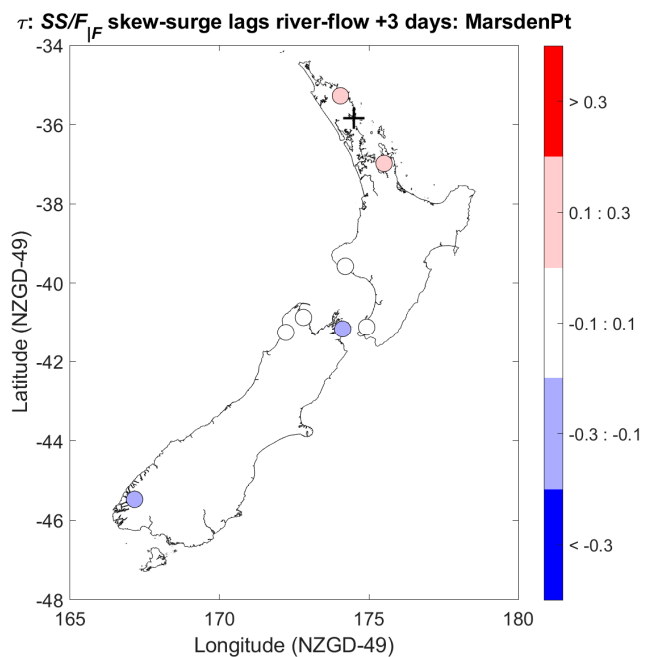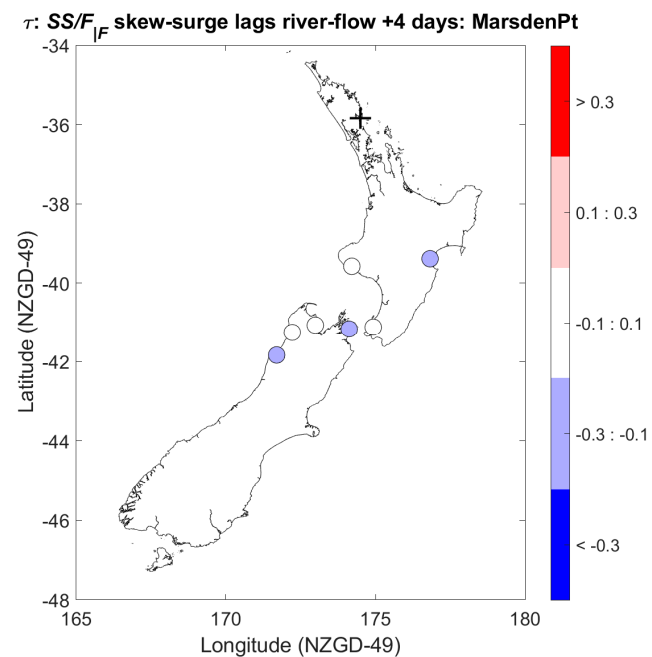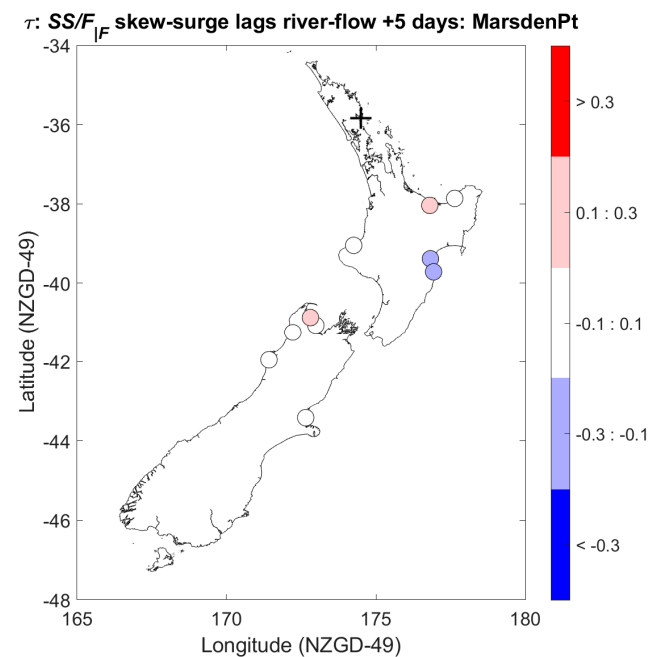

## Auckland

$\tau: SS/F_{IF}$  skew-surge precedes river-flow 5 days: Auckland

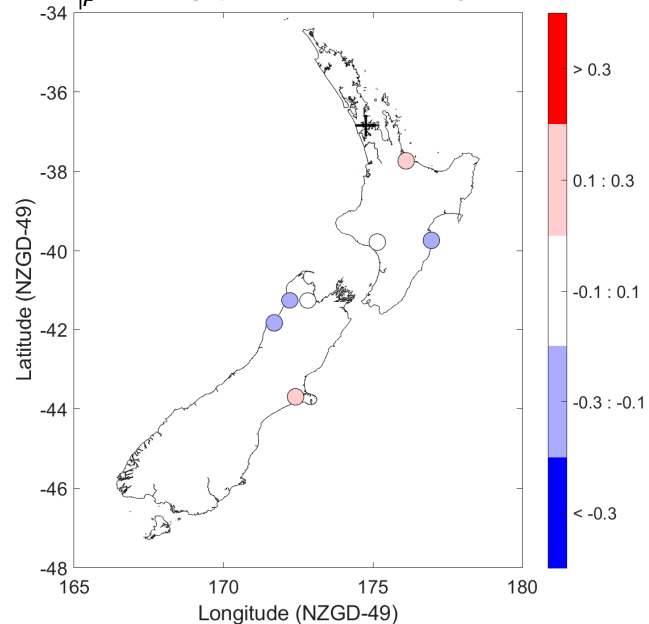

$\tau: SS/F_{IF}$  skew-surge precedes river-flow 4 days: Auckland

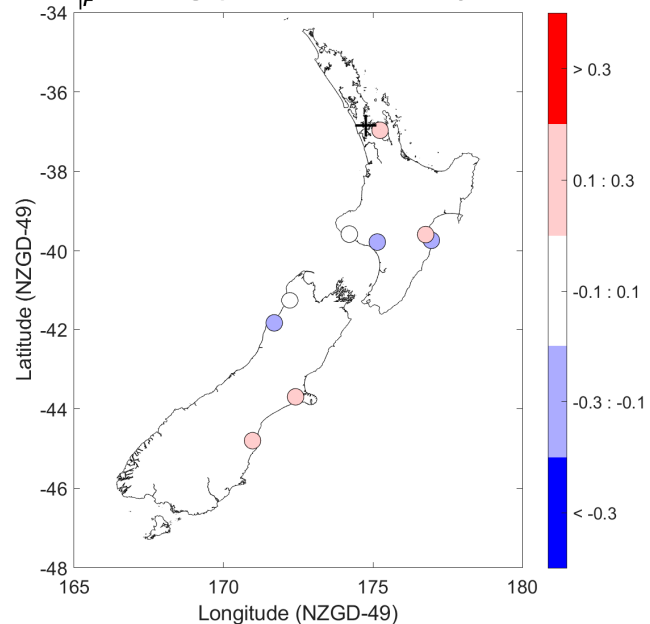

$\tau: SS/F_{IF}$  skew-surge precedes river-flow 3 days: Auckland

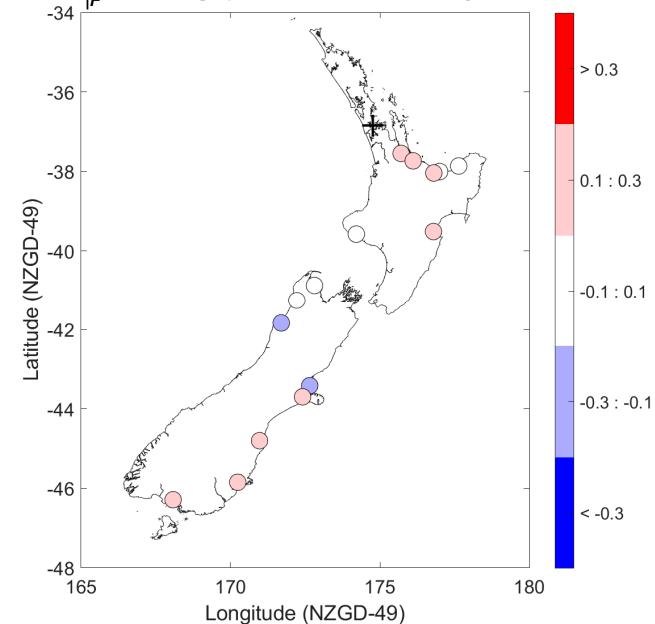

$\tau: SS/F_{IF}$  skew-surge precedes river-flow 2 days: Auckland

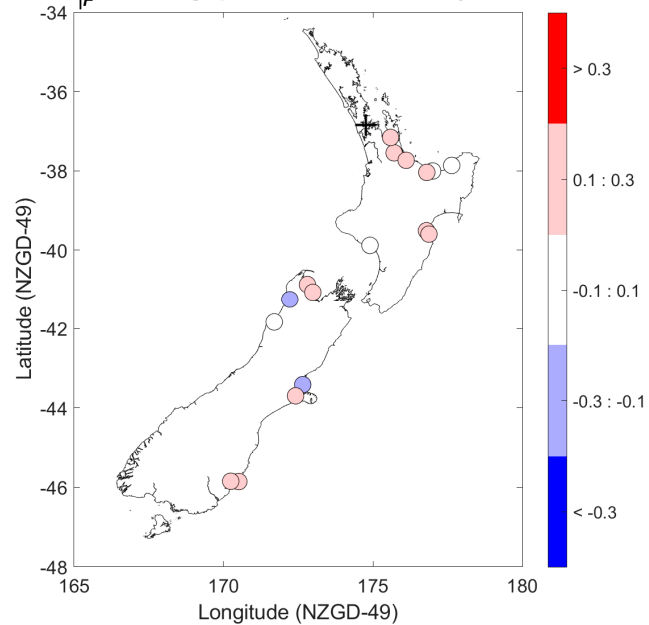

$\tau: SS/F_{IF}$  skew-surge precedes river-flow 1 days: Auckland

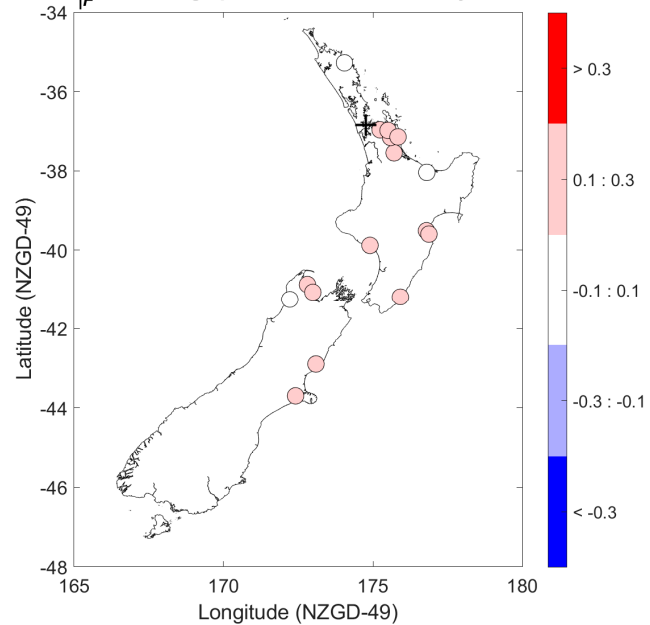

$\tau: SS/F_{IF}$  peak skew-surge same day as river-flow: Auckland

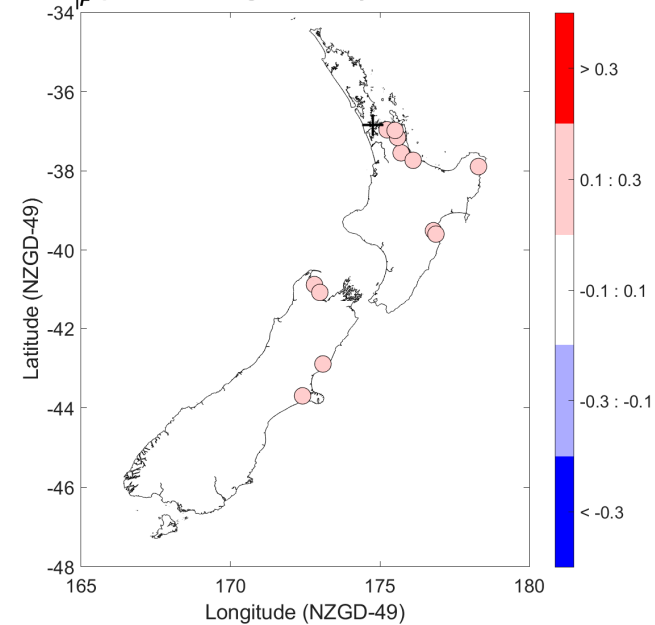

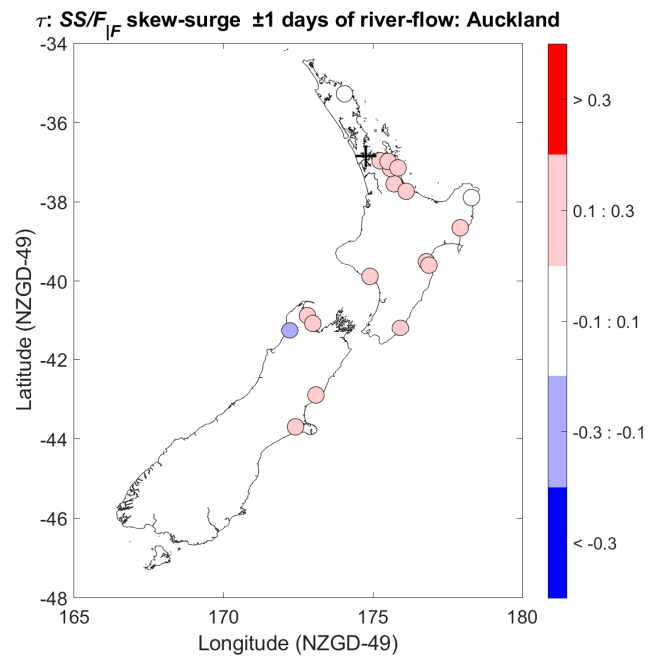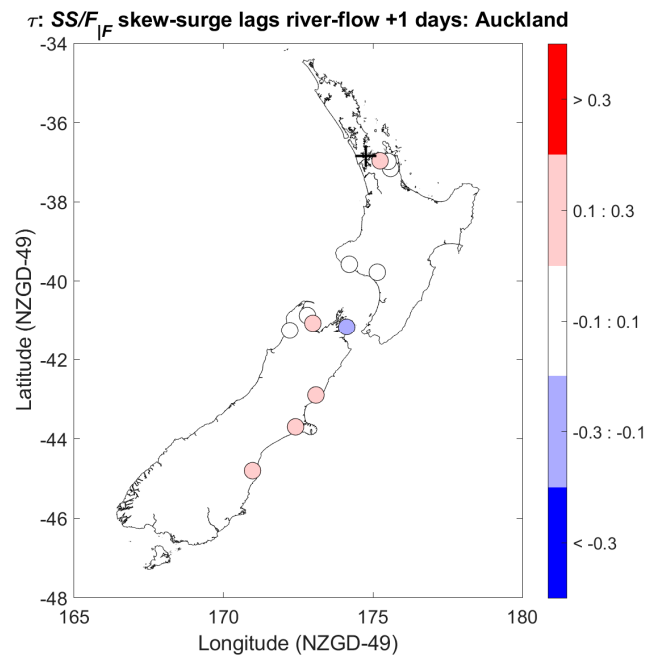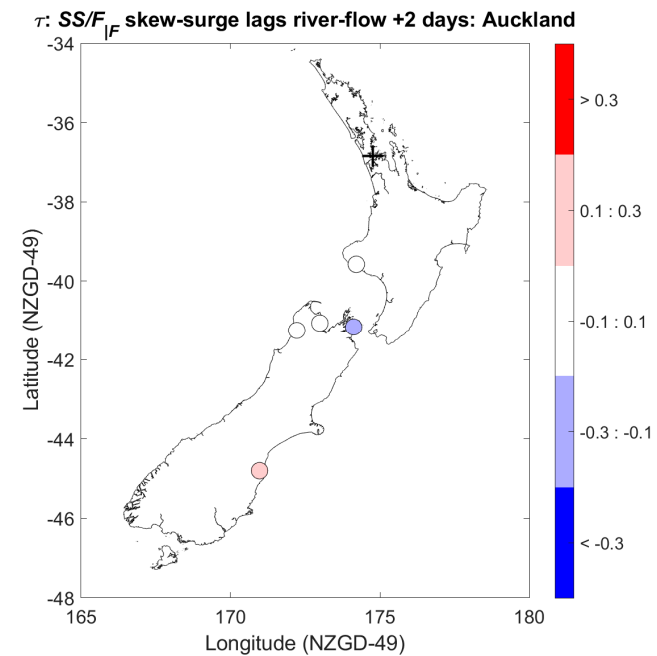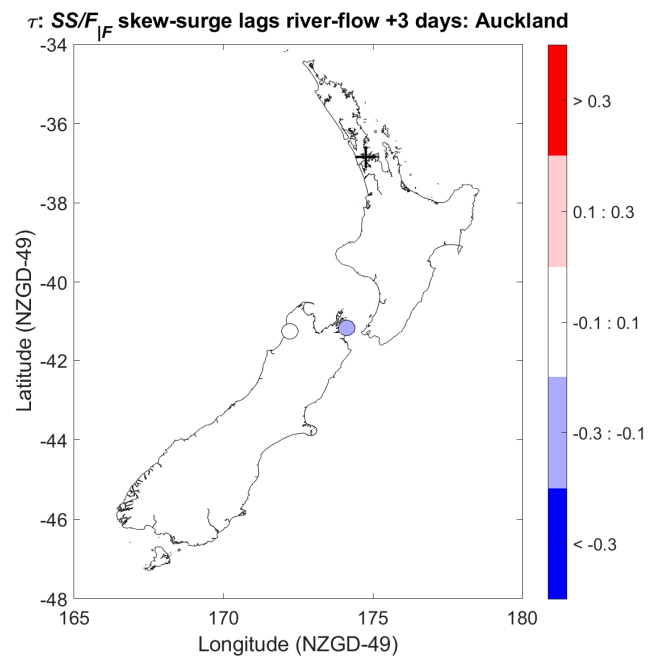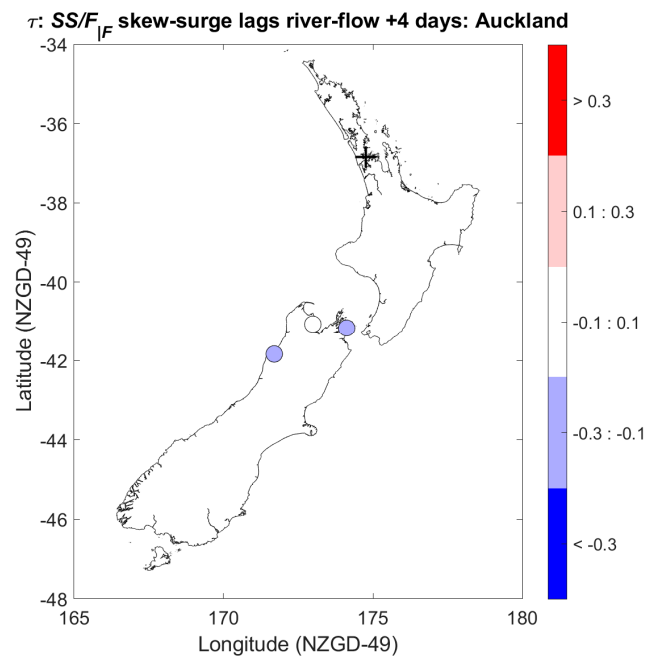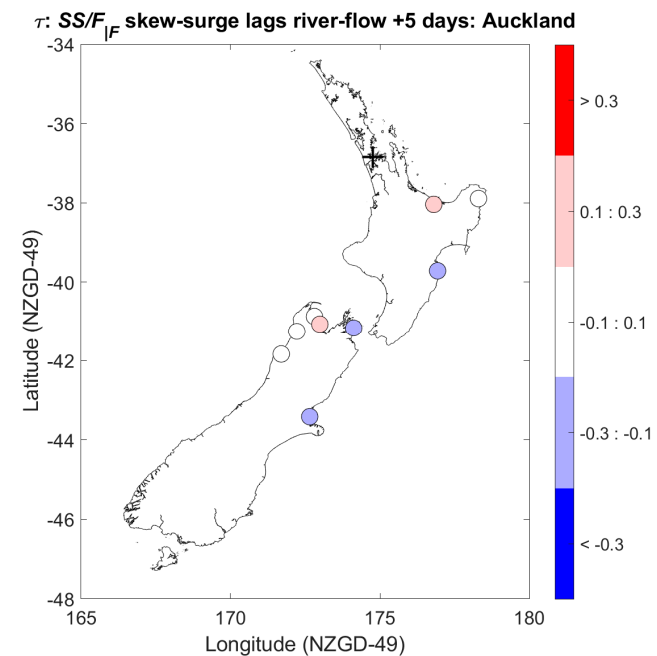

Tararu

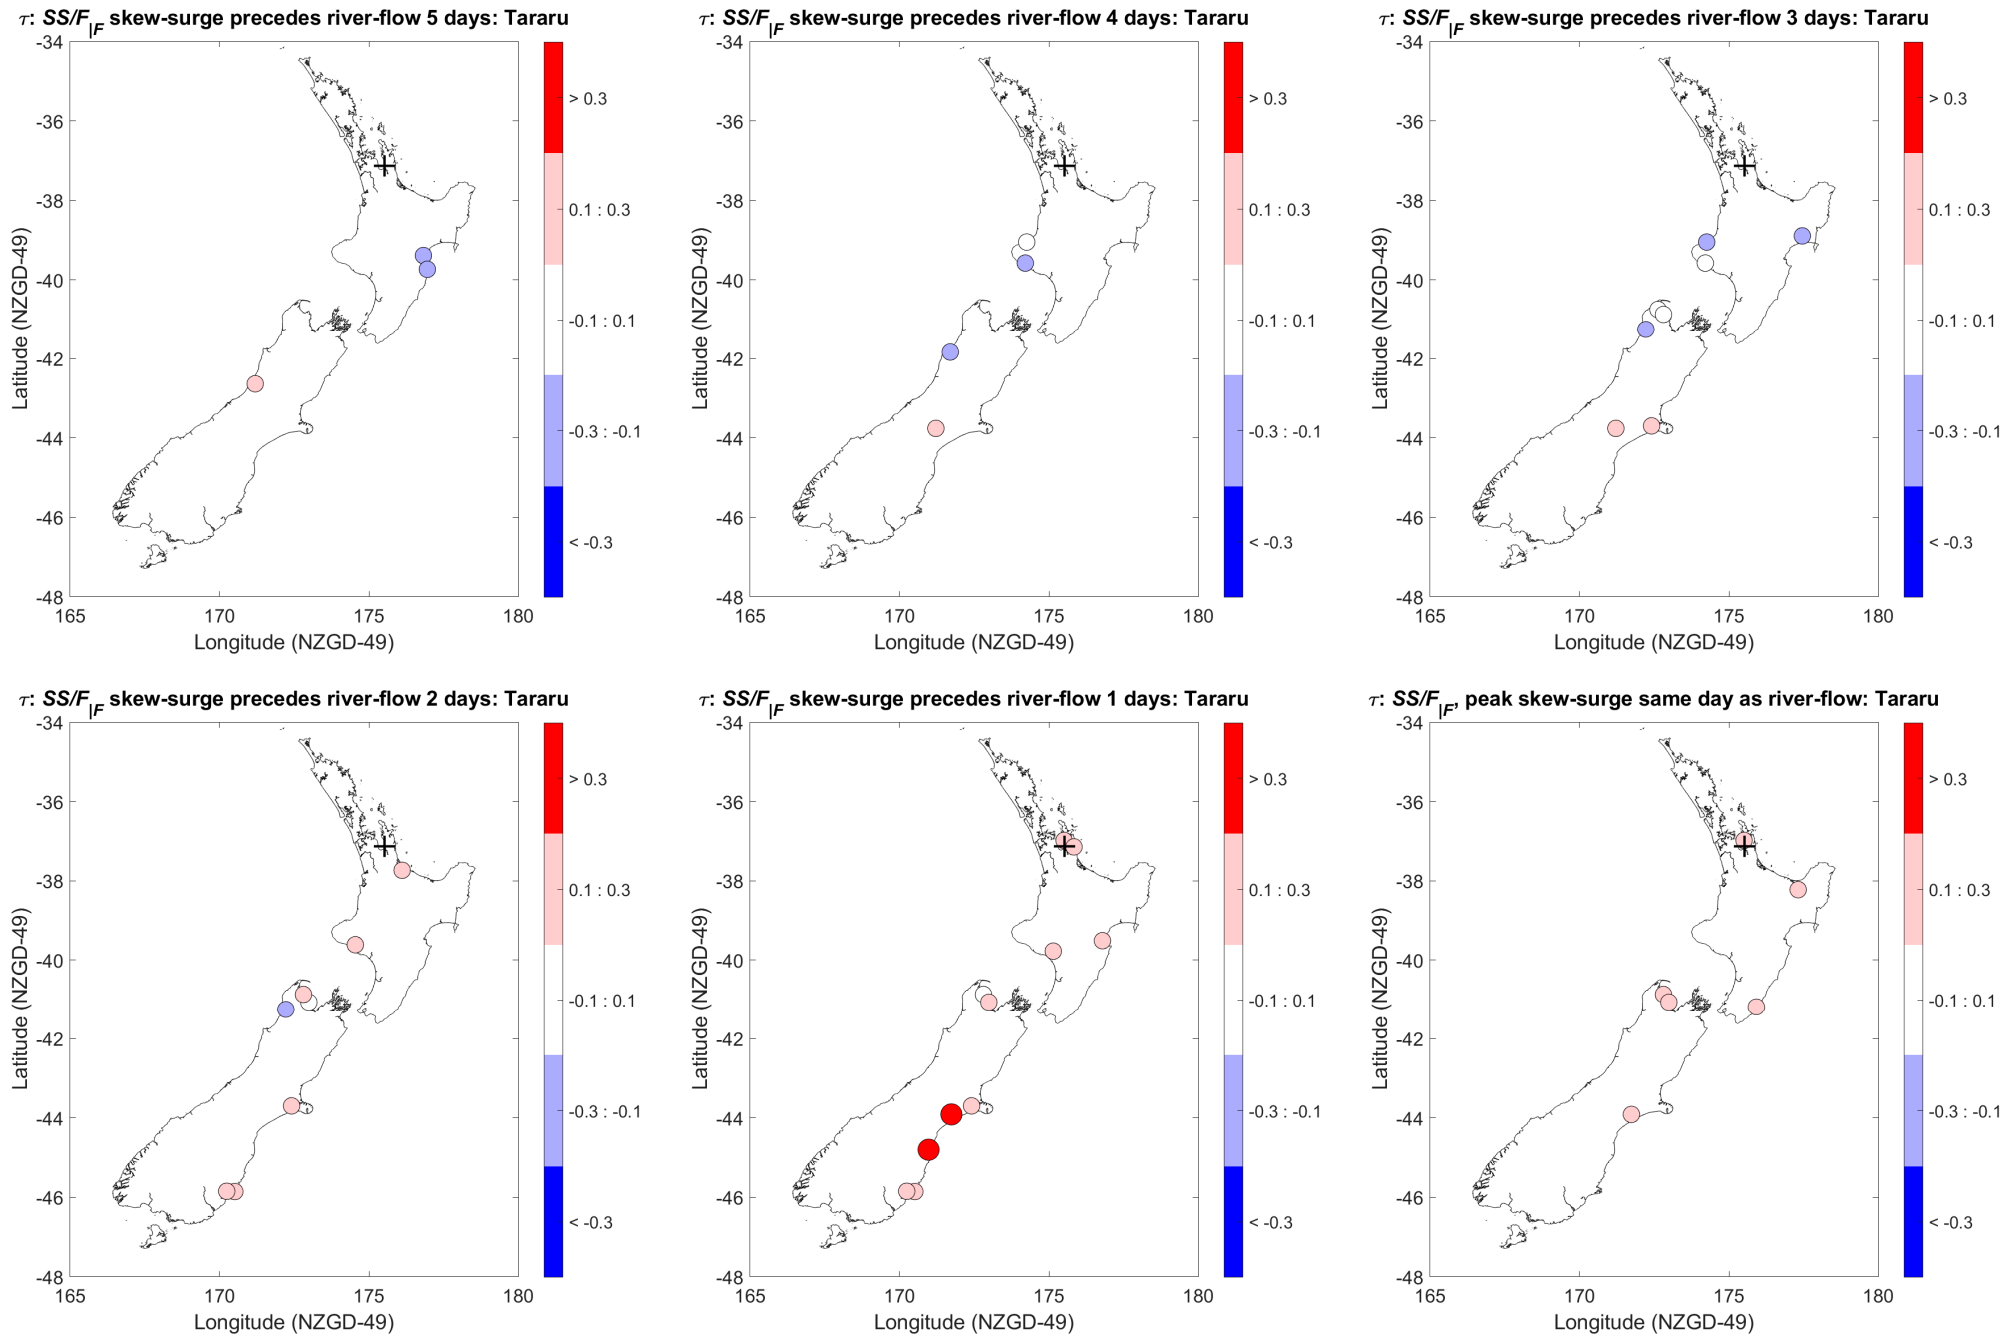

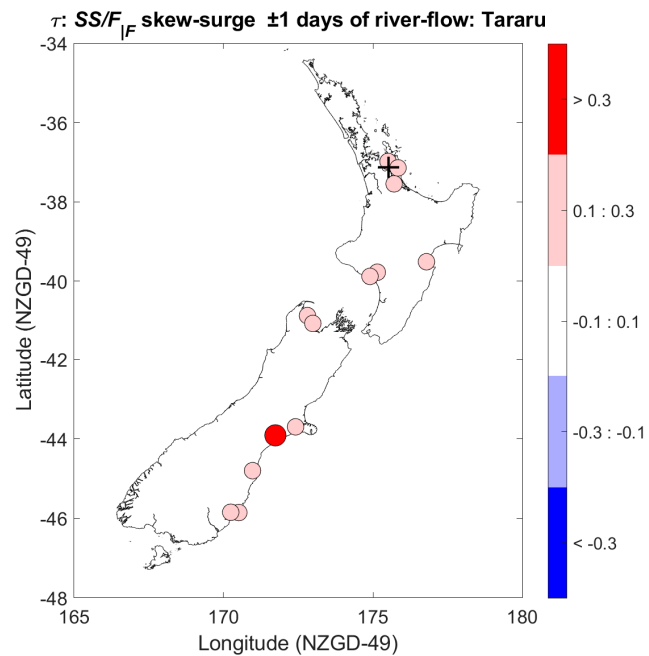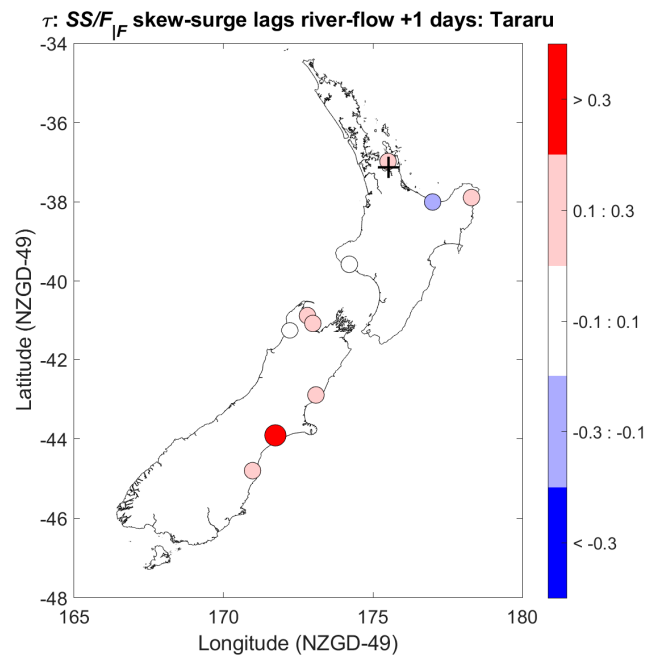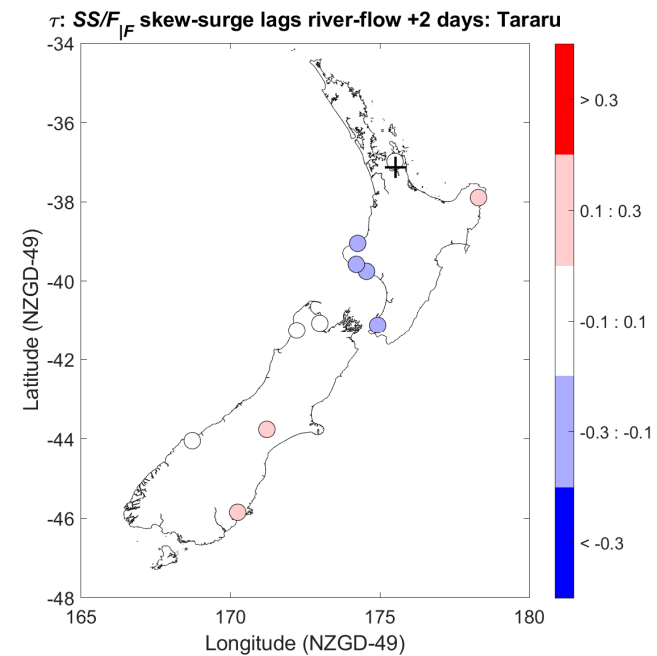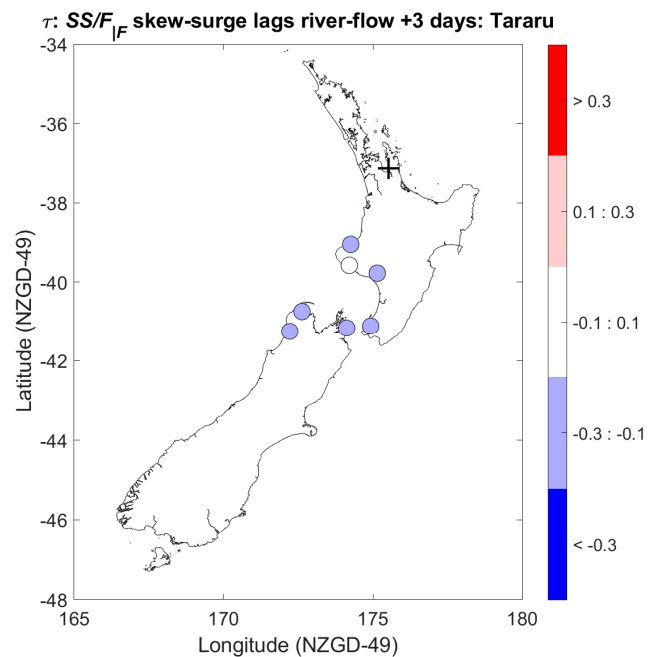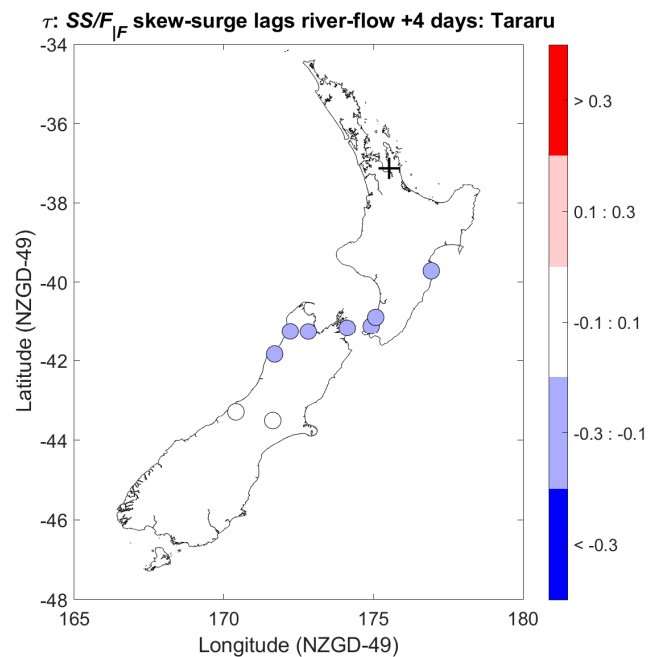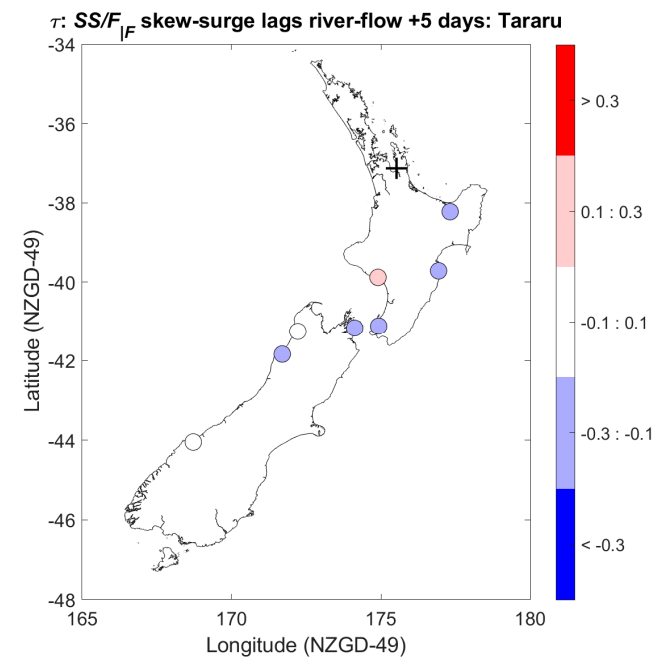



Moturiki

$\tau$ :  $SS/F_F$  skew-surge precedes river-flow 5 days: Moturiki

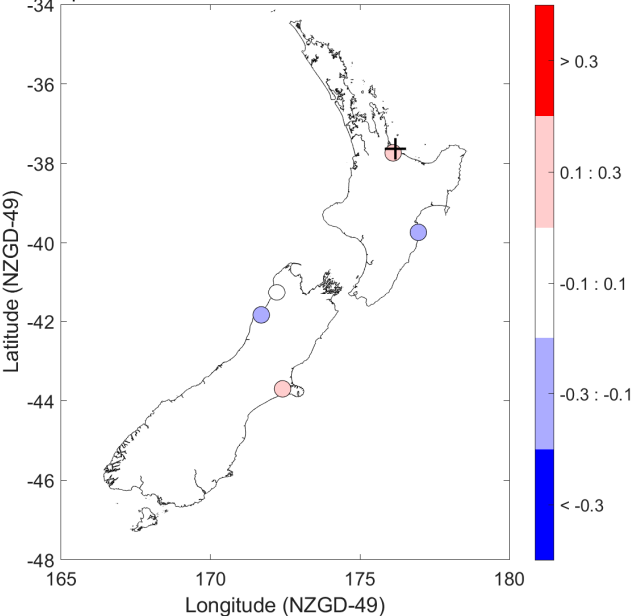

$\tau$ :  $SS/F_F$  skew-surge precedes river-flow 4 days: Moturiki

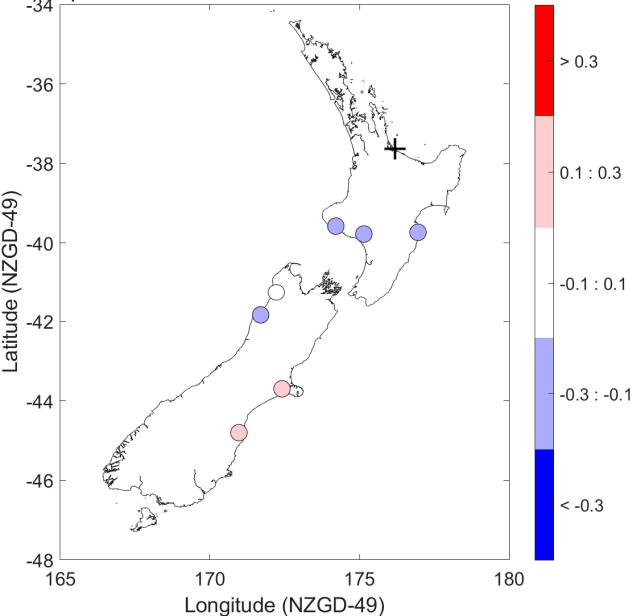

$\tau$ :  $SS/F_F$  skew-surge precedes river-flow 3 days: Moturiki

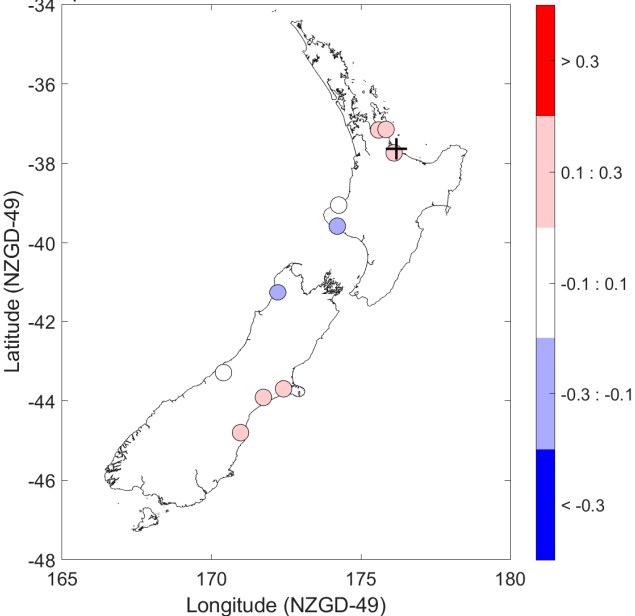

$\tau$ :  $SS/F_F$  skew-surge precedes river-flow 2 days: Moturiki

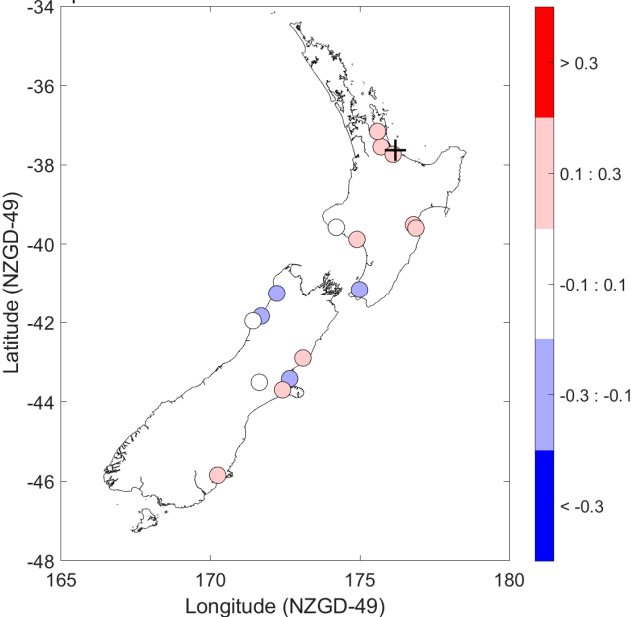

$\tau$ :  $SS/F_F$  skew-surge precedes river-flow 1 days: Moturiki

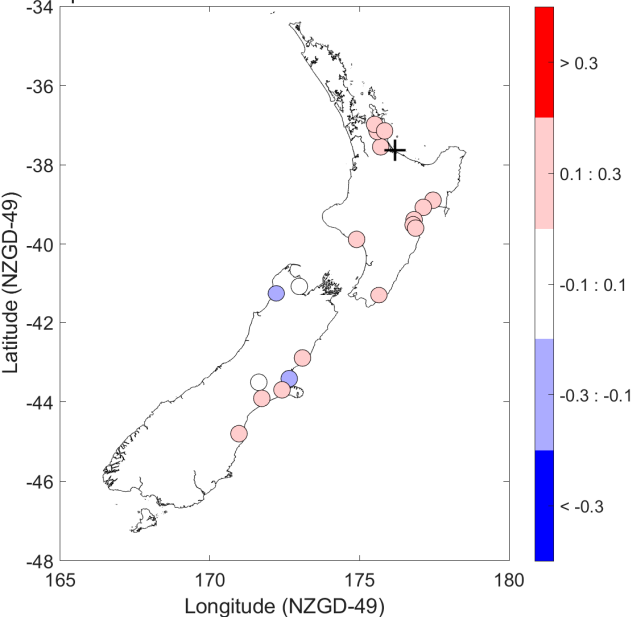

$\tau$ :  $SS/F_F$  peak skew-surge same day as river-flow: Moturiki

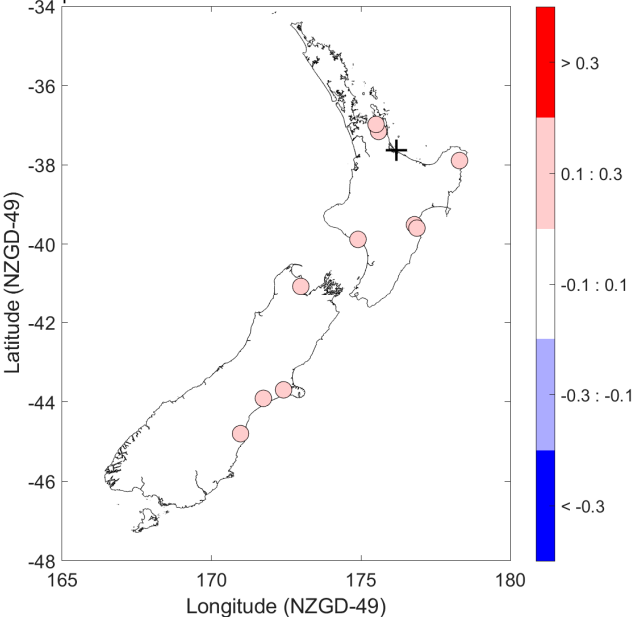

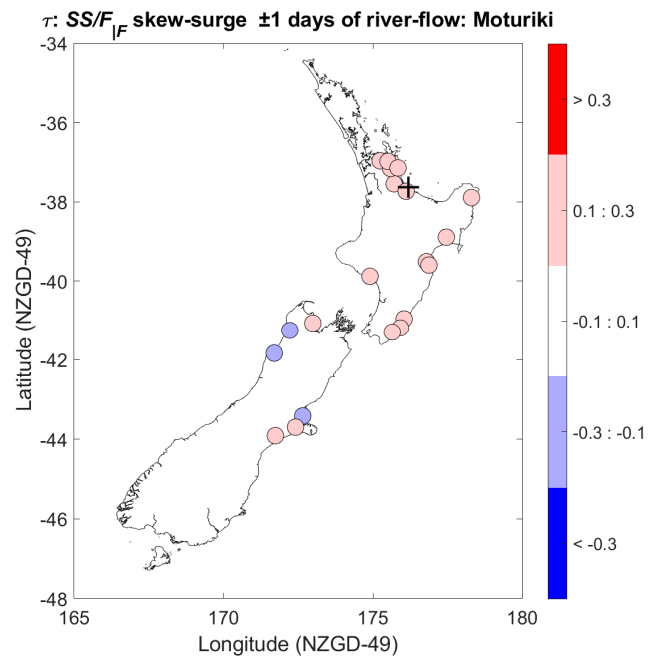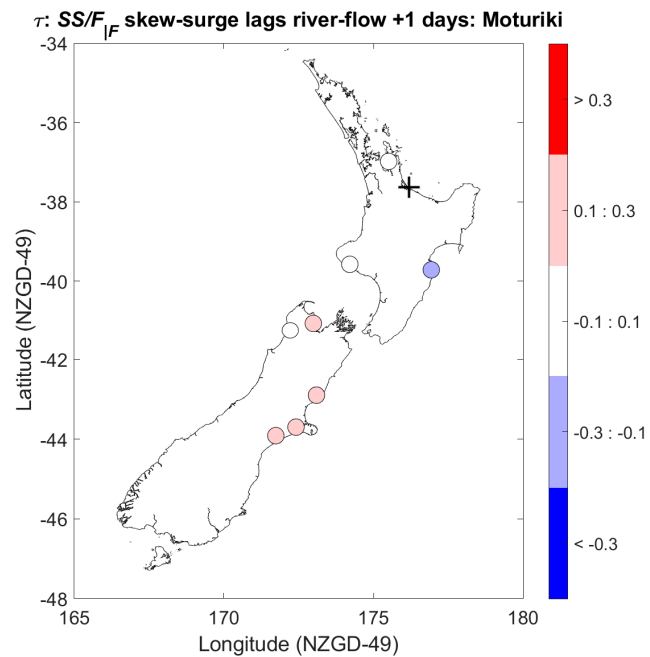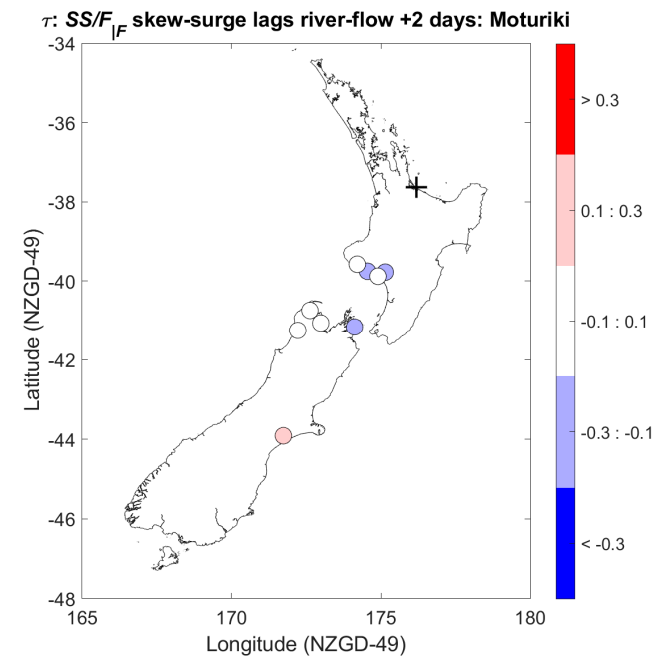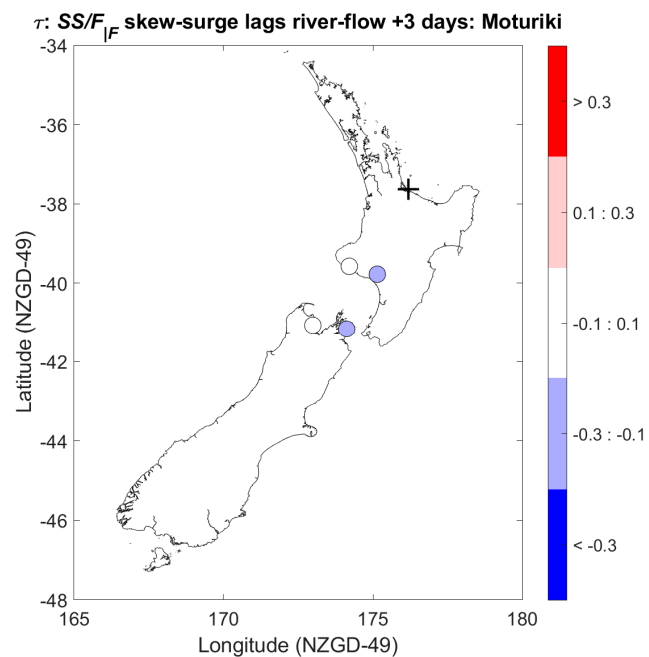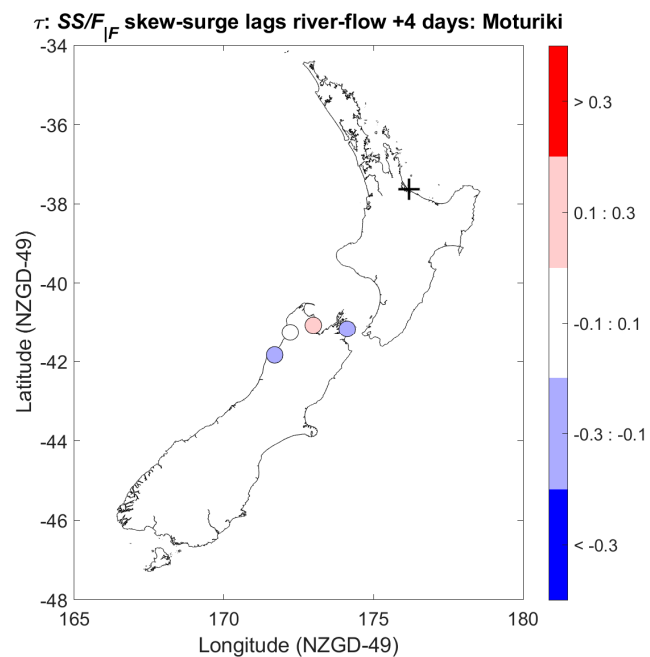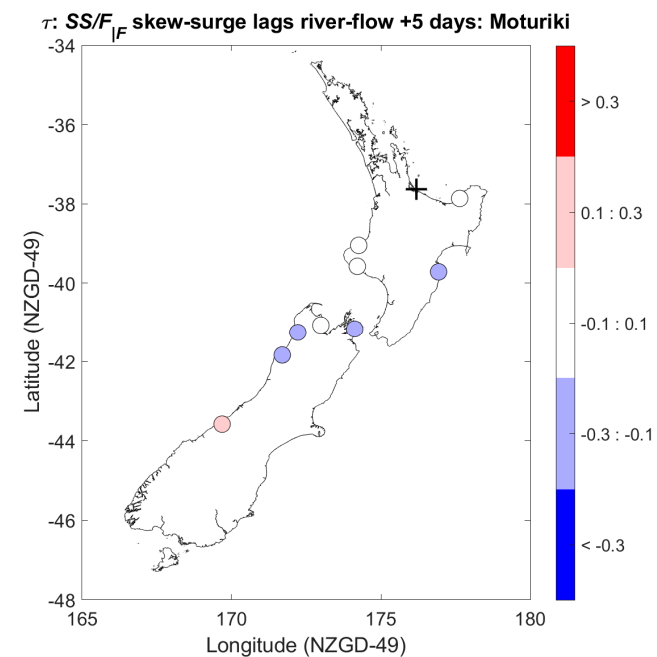

Taranaki

$\tau$ :  $SS/F_F$  skew-surge precedes river-flow 5 days: Taranaki

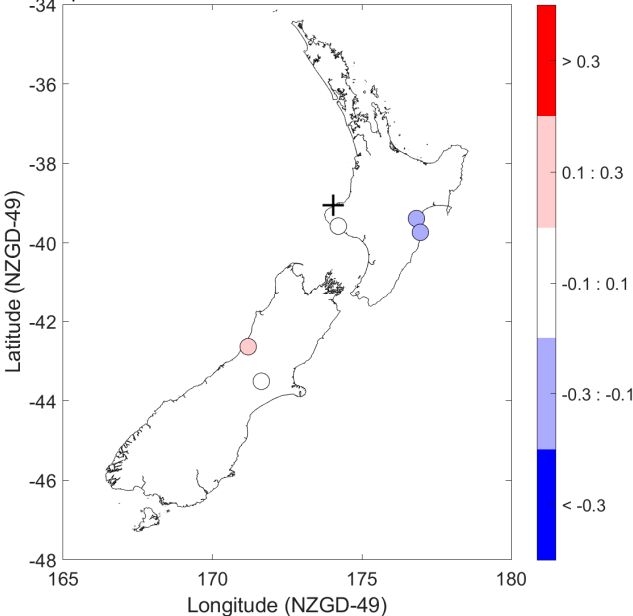

$\tau$ :  $SS/F_F$  skew-surge precedes river-flow 4 days: Taranaki

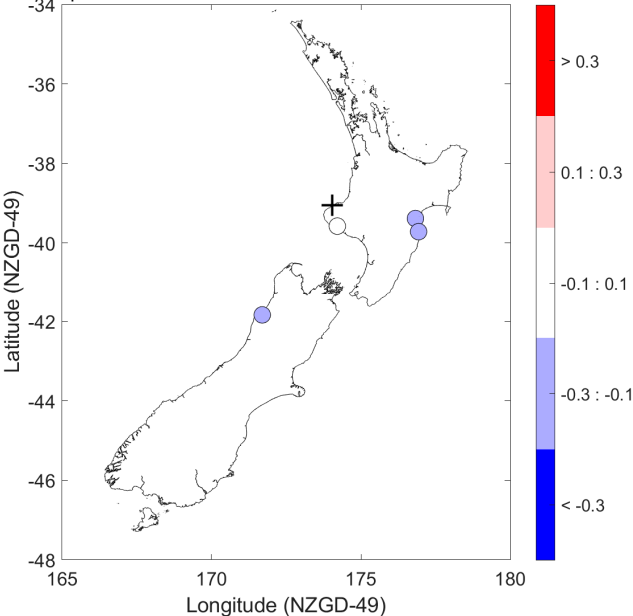

$\tau$ :  $SS/F_F$  skew-surge precedes river-flow 3 days: Taranaki

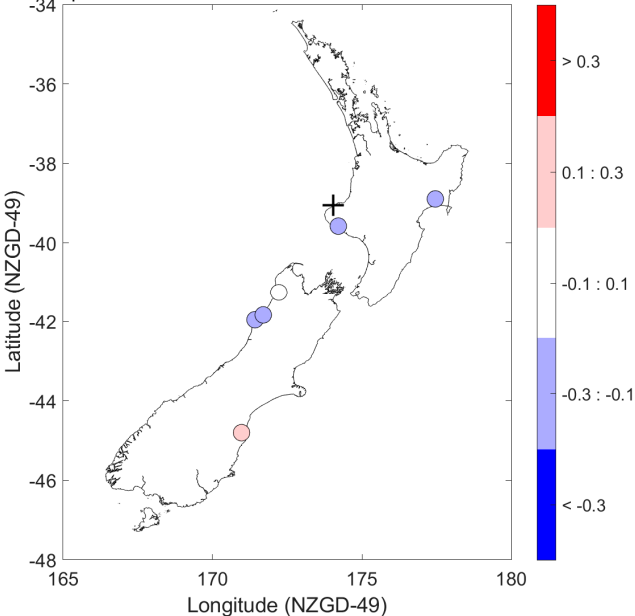

$\tau$ :  $SS/F_F$  skew-surge precedes river-flow 2 days: Taranaki

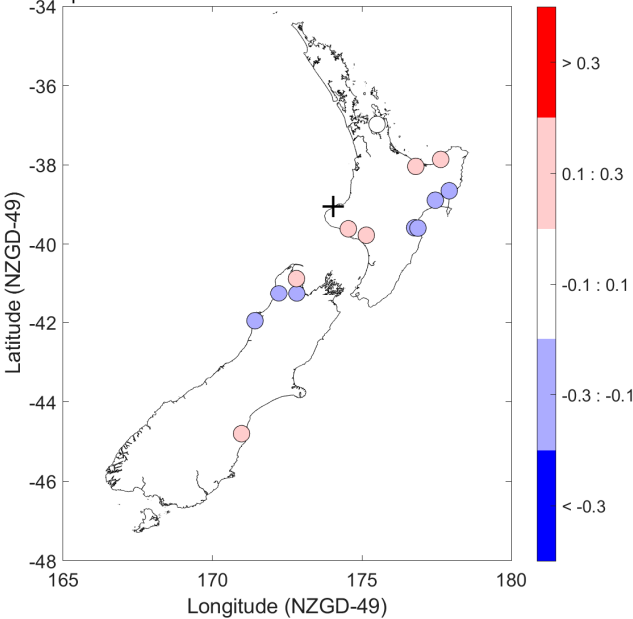

$\tau$ :  $SS/F_F$  skew-surge precedes river-flow 1 days: Taranaki

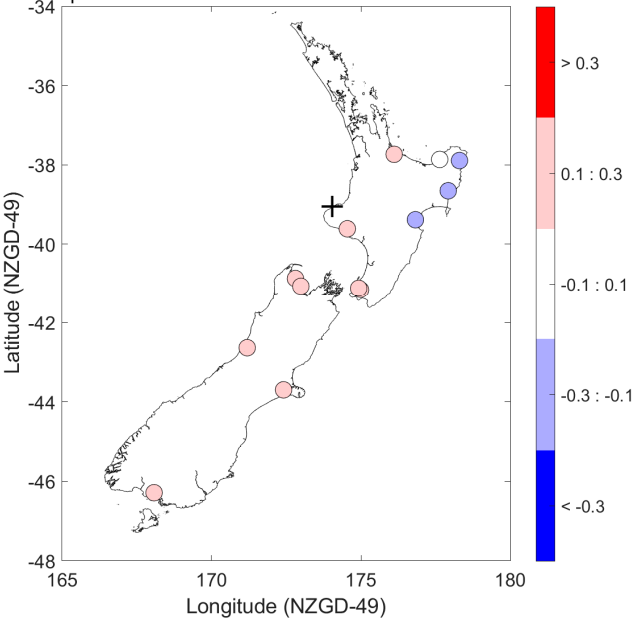

$\tau$ :  $SS/F_F$  peak skew-surge same day as river-flow: Taranaki

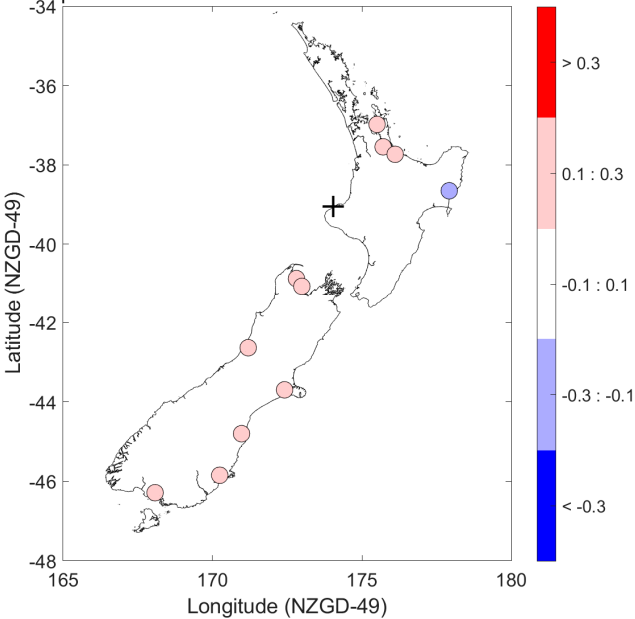

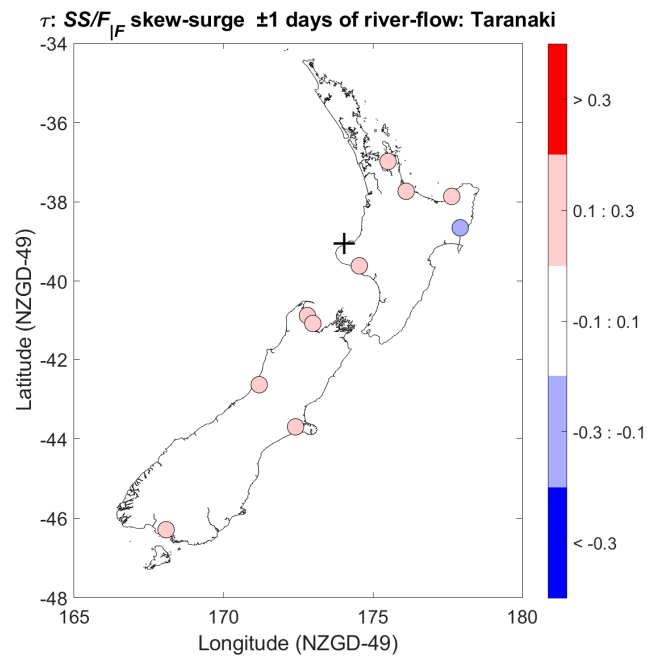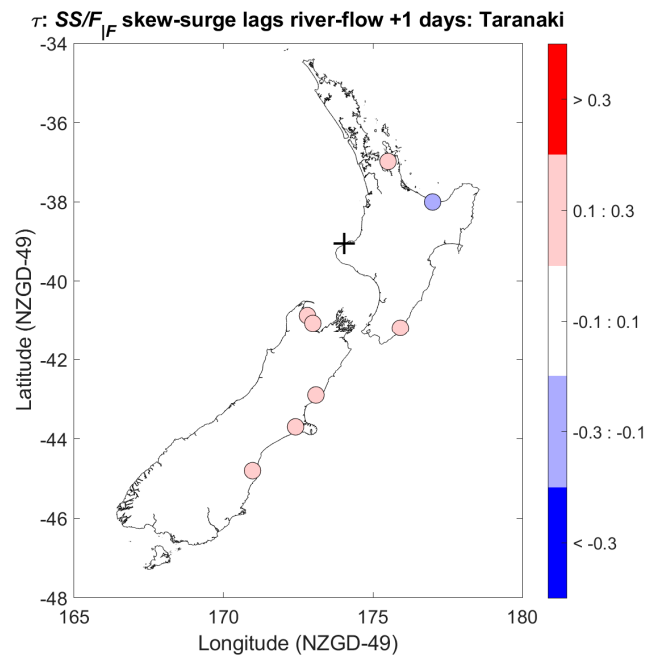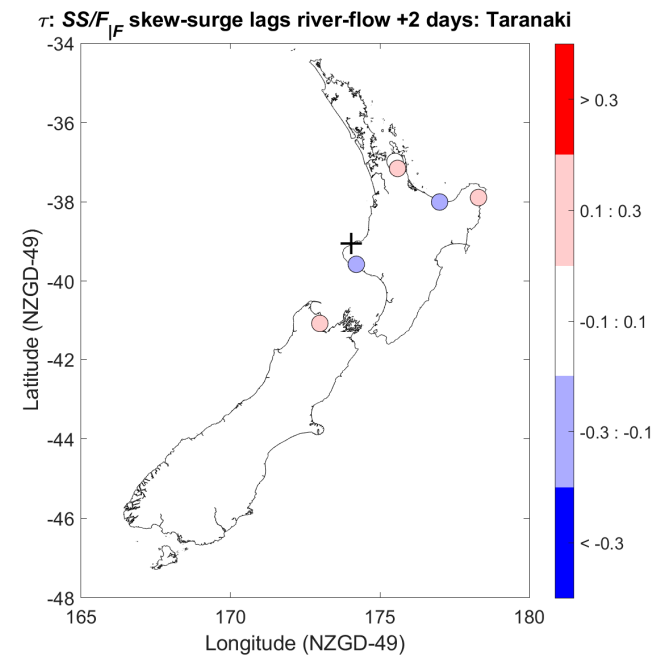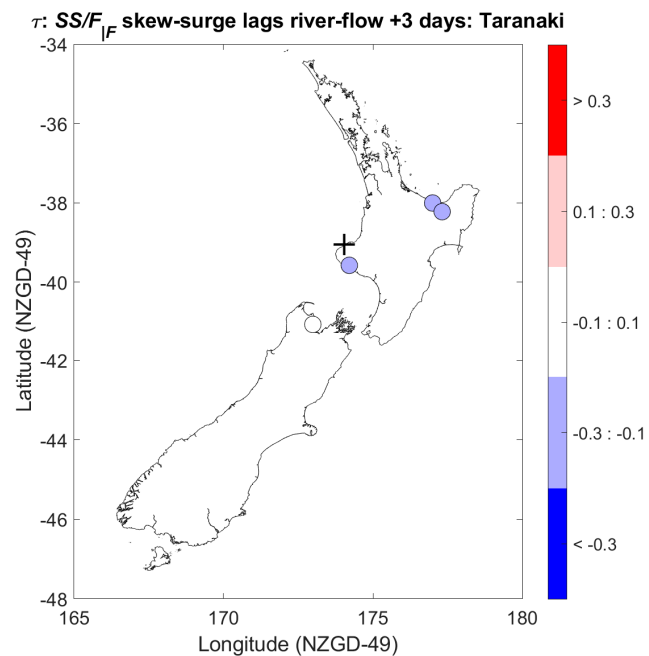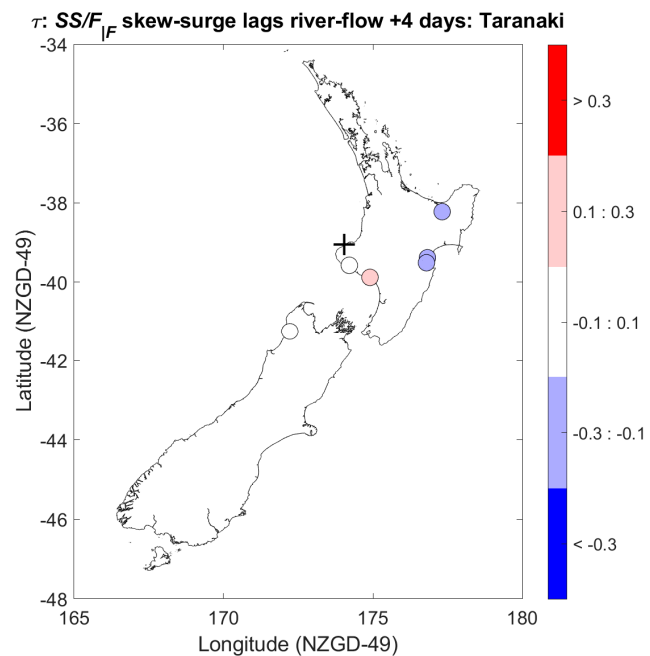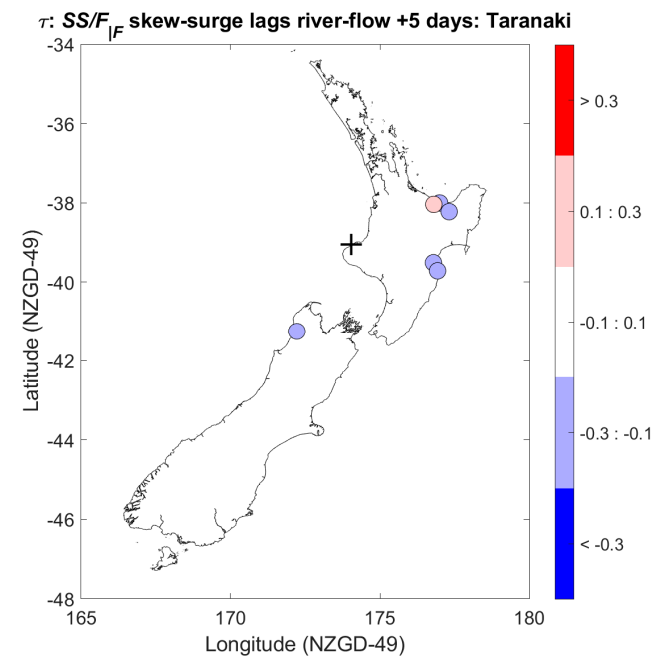

Nelson

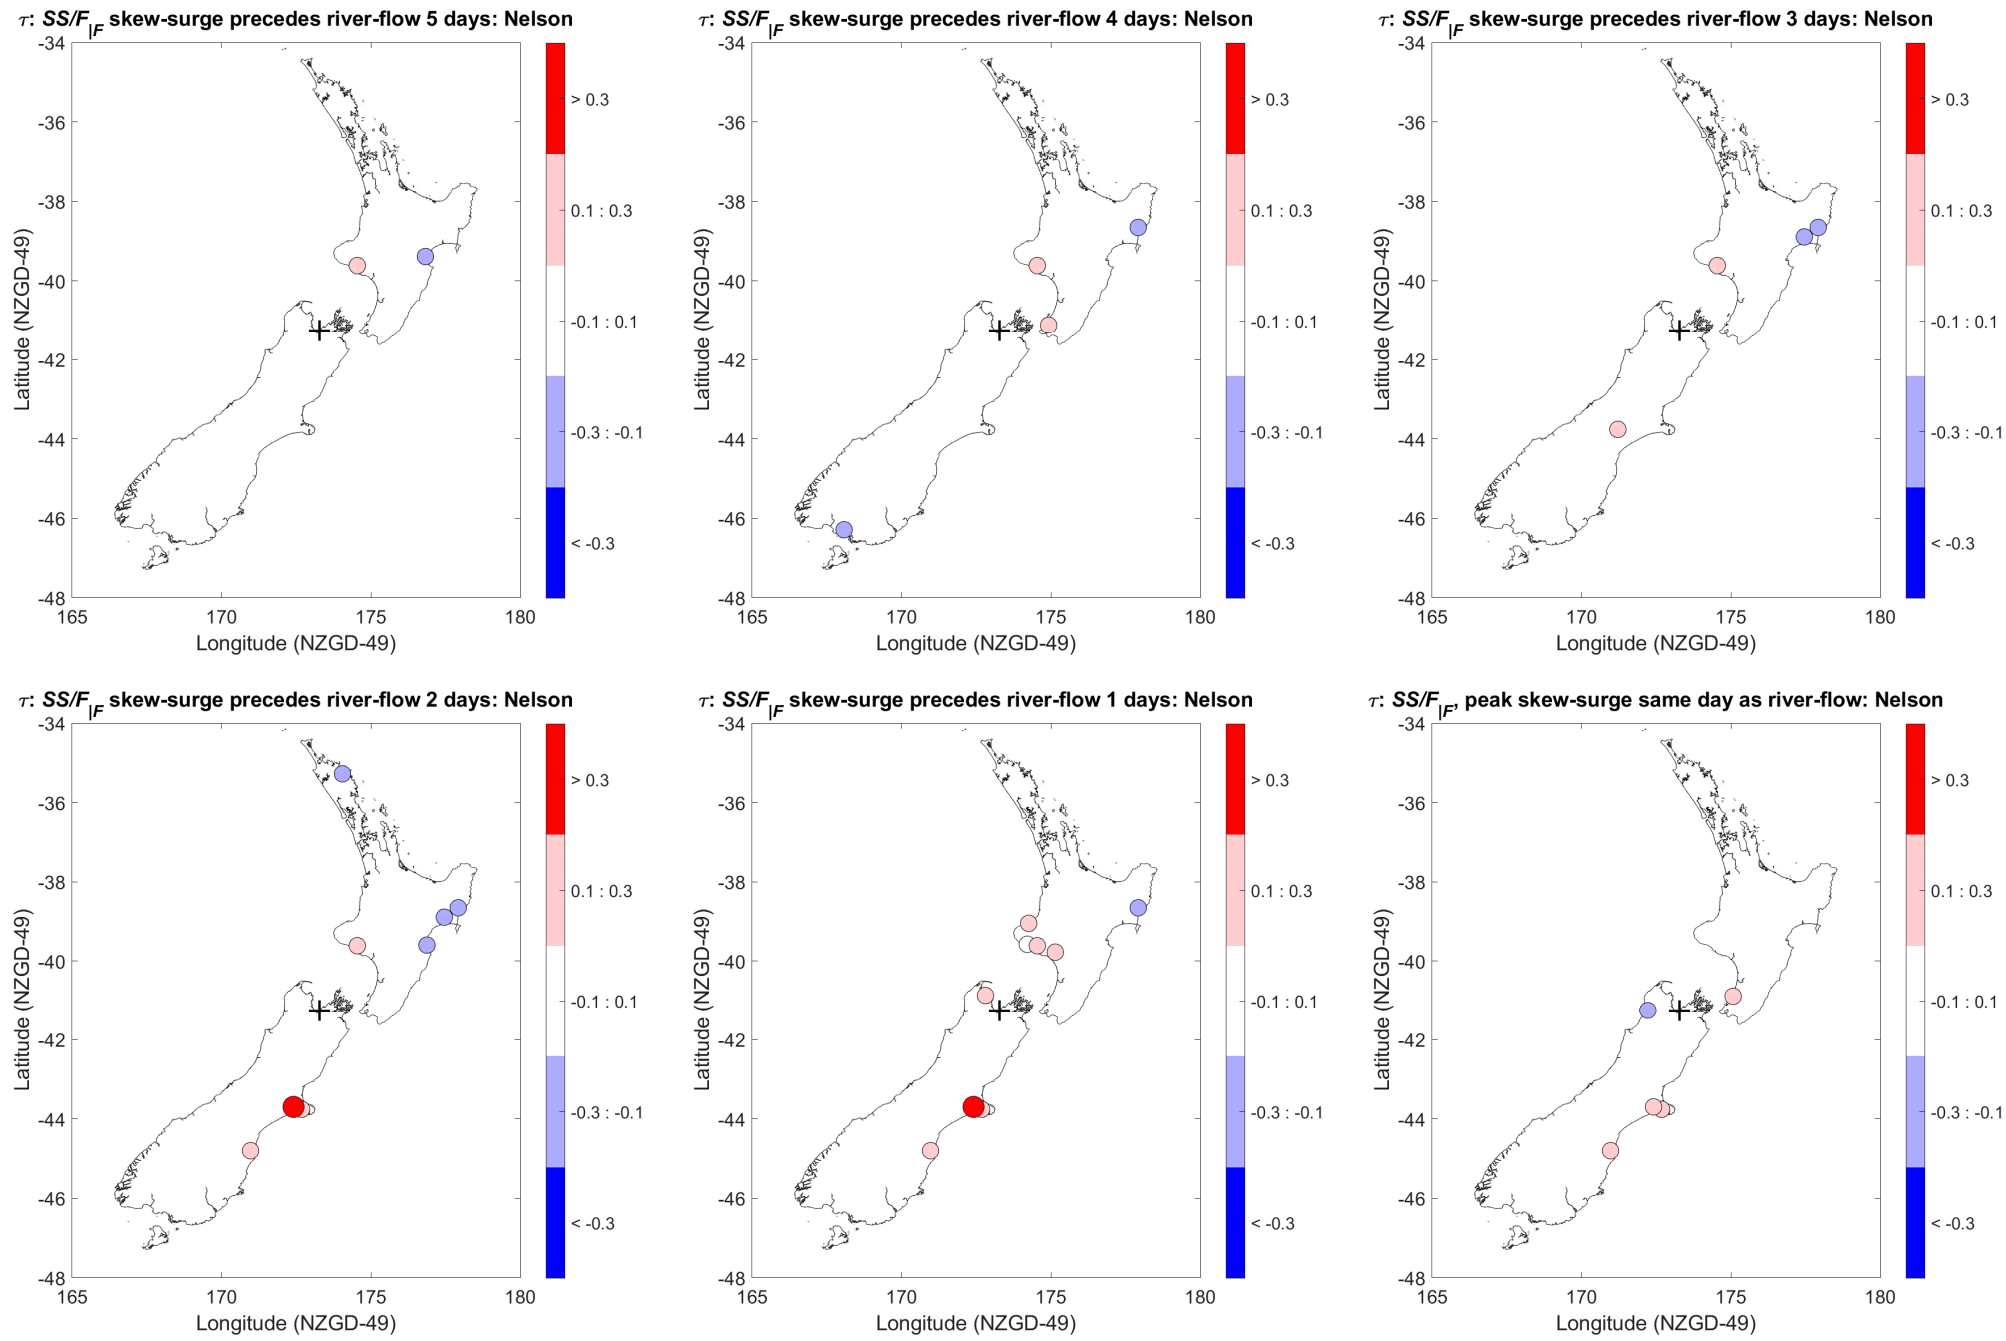

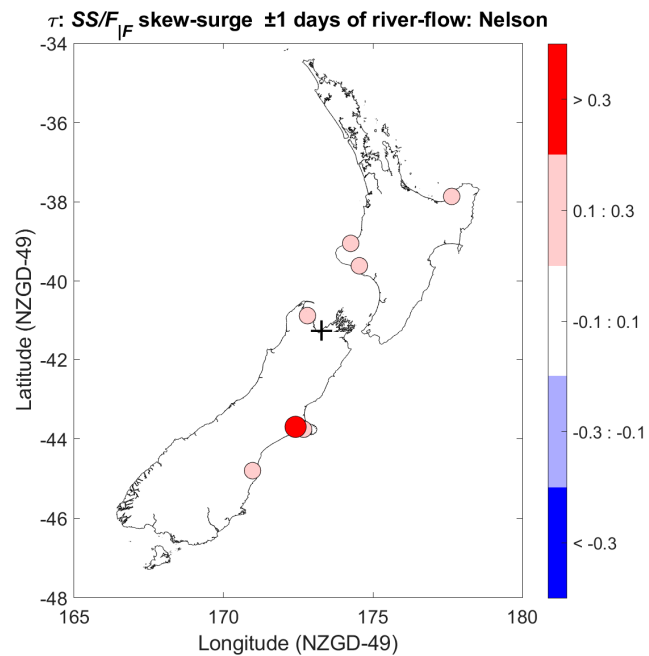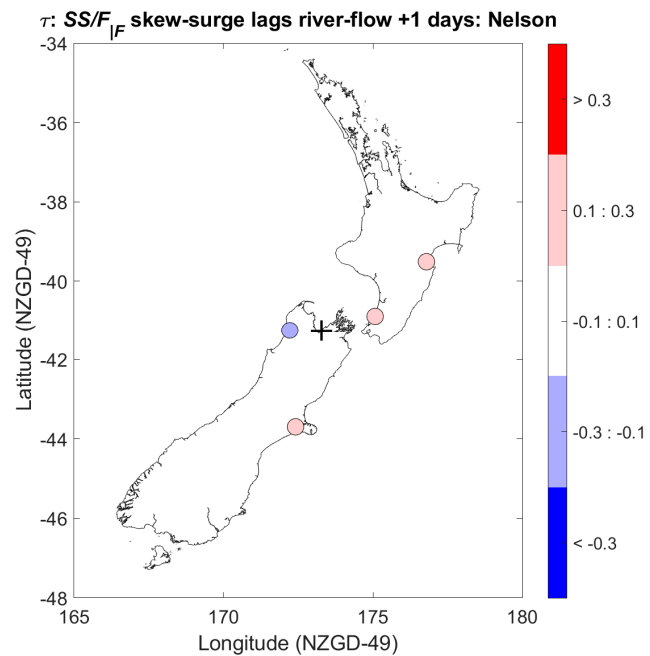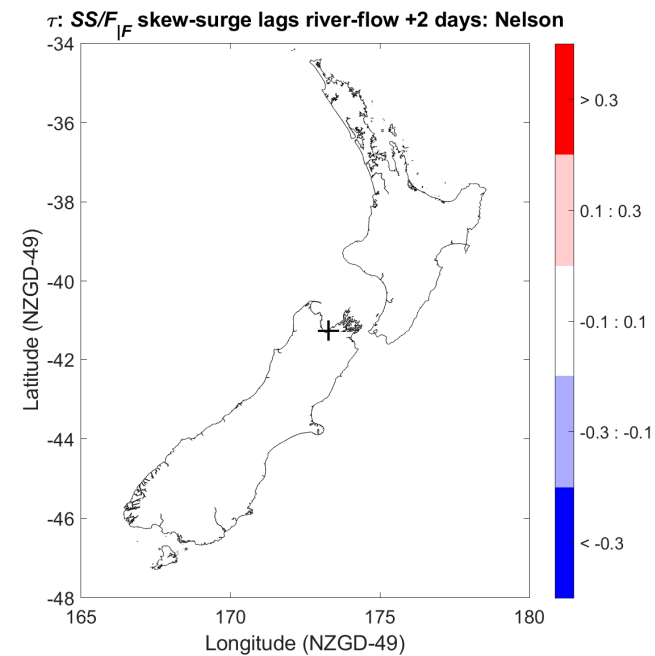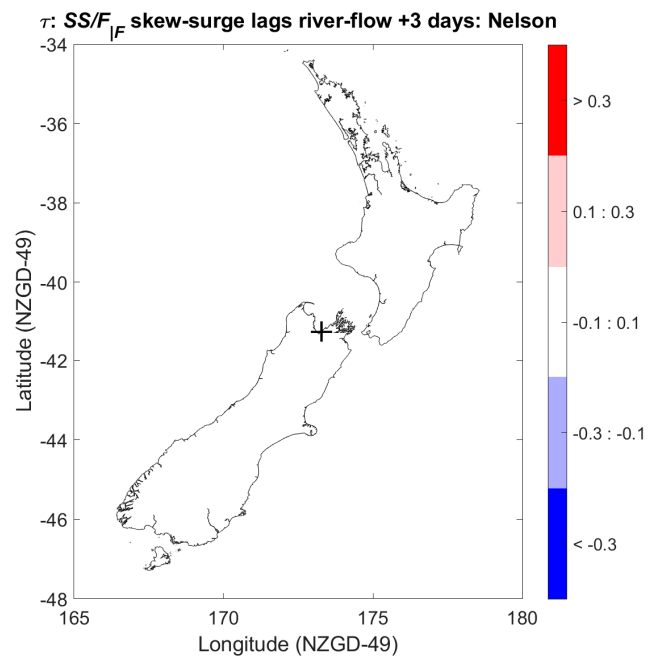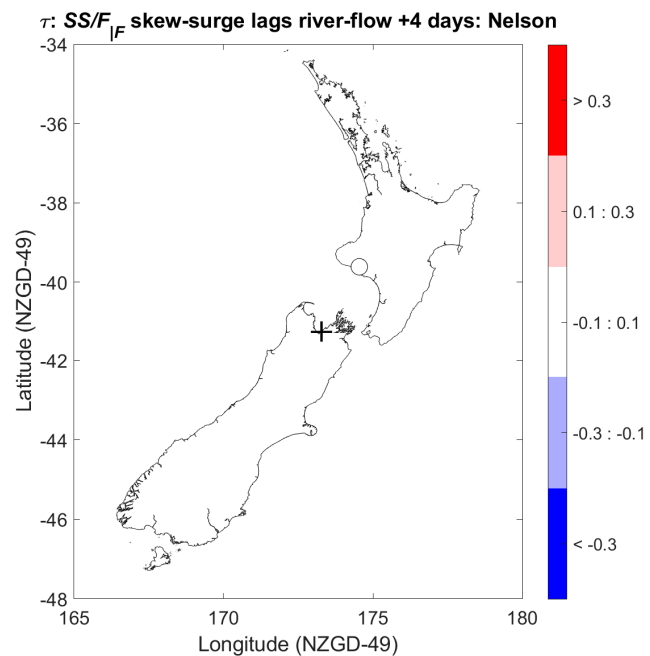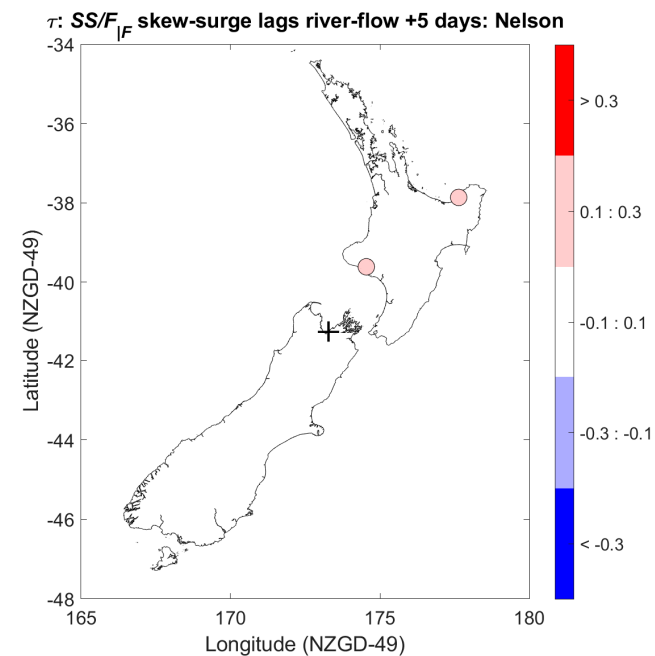

Wellington

$\tau: SS/F_F$  skew-surge precedes river-flow 5 days: Wellington

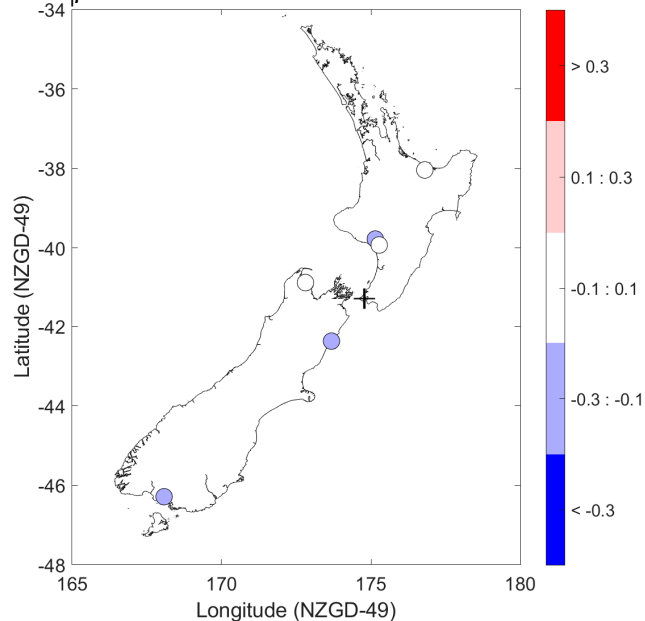

$\tau: SS/F_F$  skew-surge precedes river-flow 4 days: Wellington

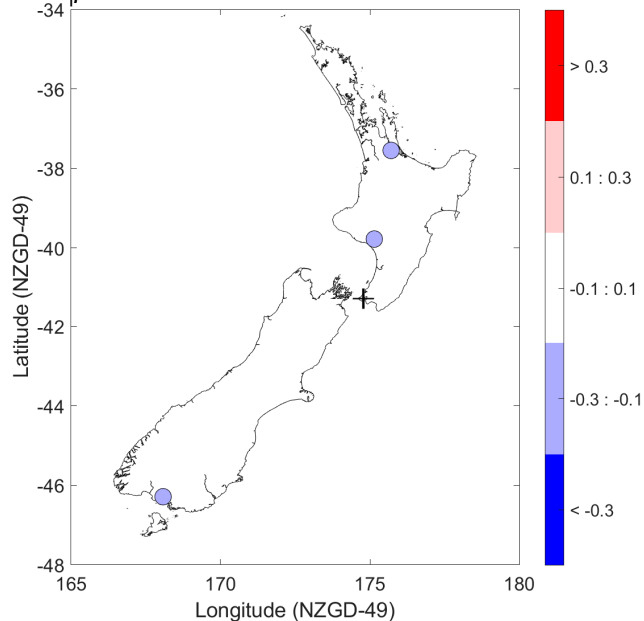

$\tau: SS/F_F$  skew-surge precedes river-flow 3 days: Wellington

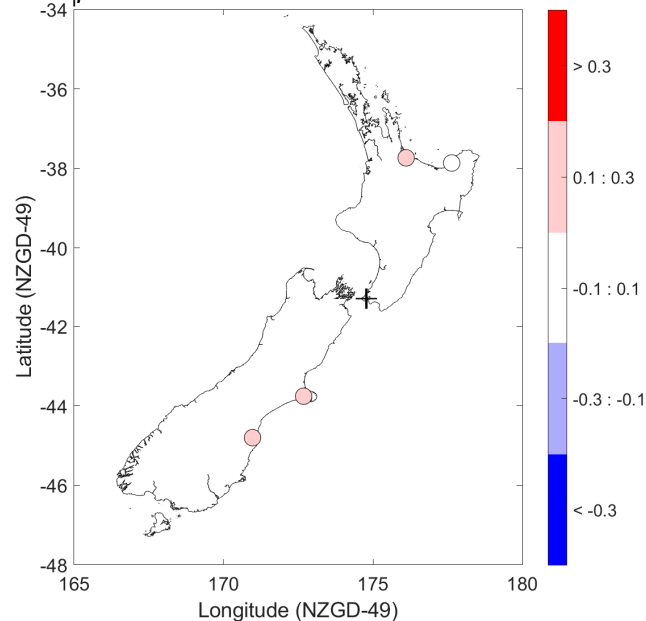

$\tau: SS/F_F$  skew-surge precedes river-flow 2 days: Wellington

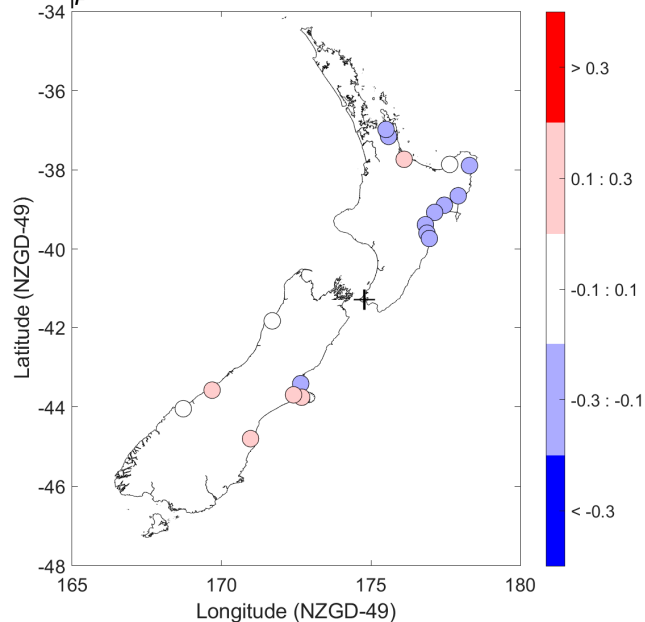

$\tau: SS/F_F$  skew-surge precedes river-flow 1 days: Wellington

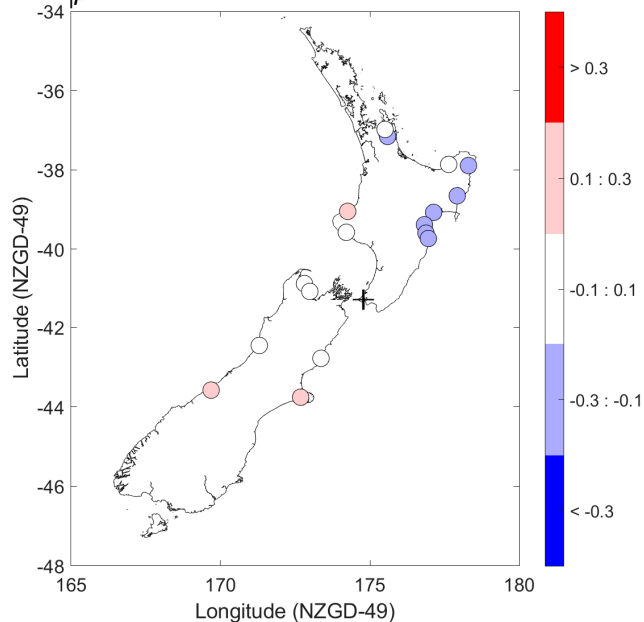

$\tau: SS/F_F$  peak skew-surge same day as river-flow: Wellington

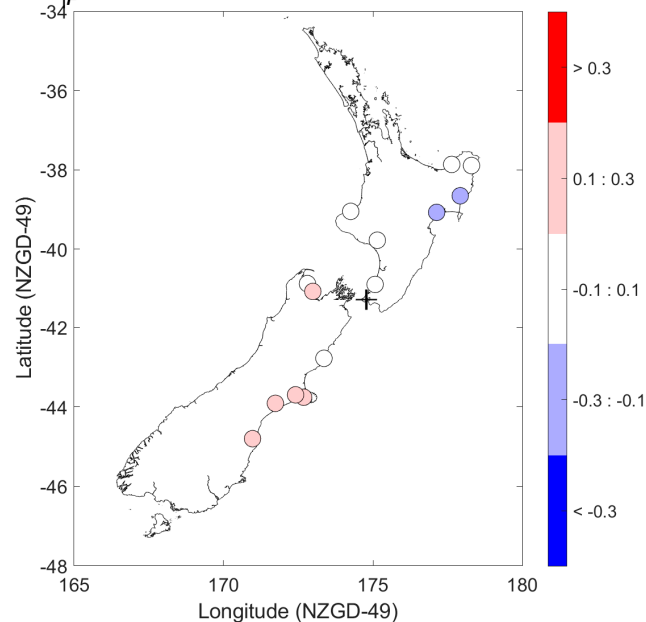

$\tau$ :  $SS/F_F$  skew-surge  $\pm 1$  days of river-flow: Wellington

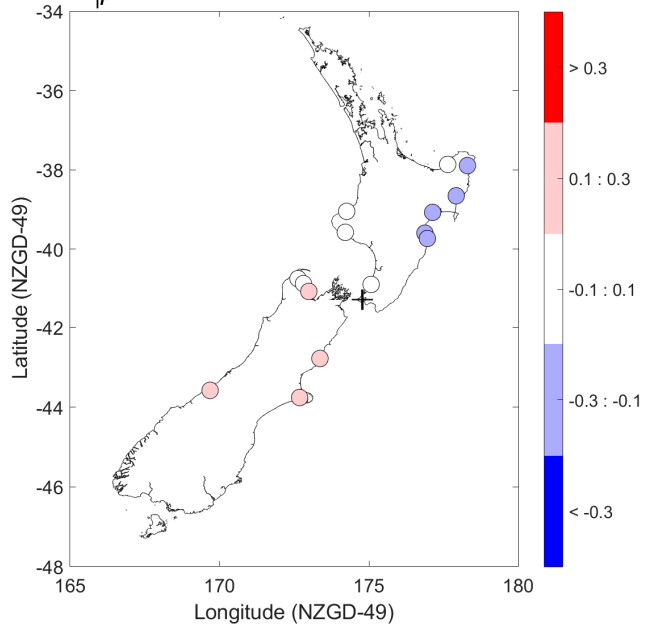

$\tau$ :  $SS/F_F$  skew-surge lags river-flow +1 days: Wellington

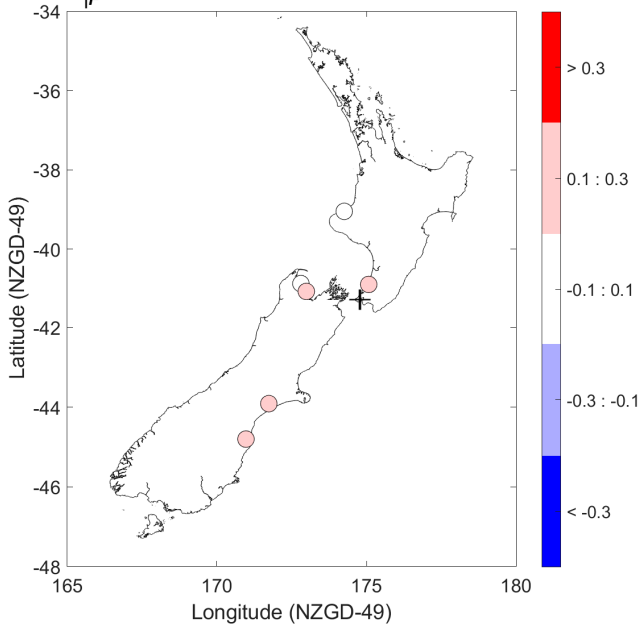

$\tau$ :  $SS/F_F$  skew-surge lags river-flow +2 days: Wellington

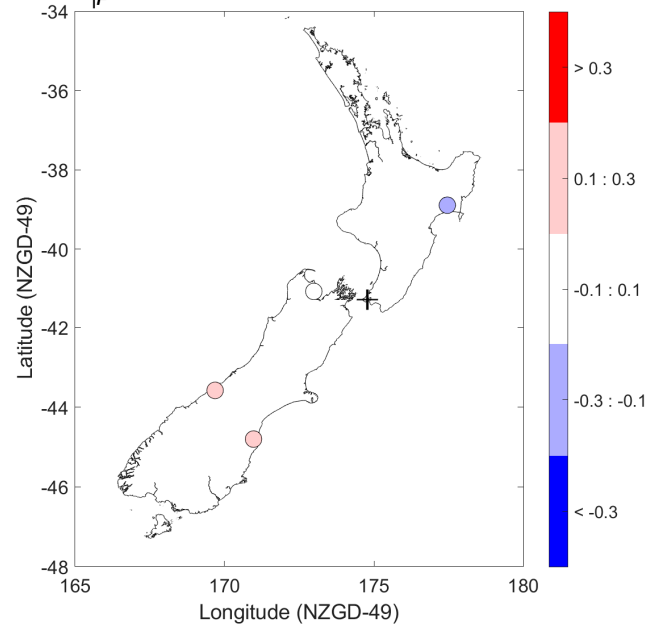

$\tau$ :  $SS/F_F$  skew-surge lags river-flow +3 days: Wellington

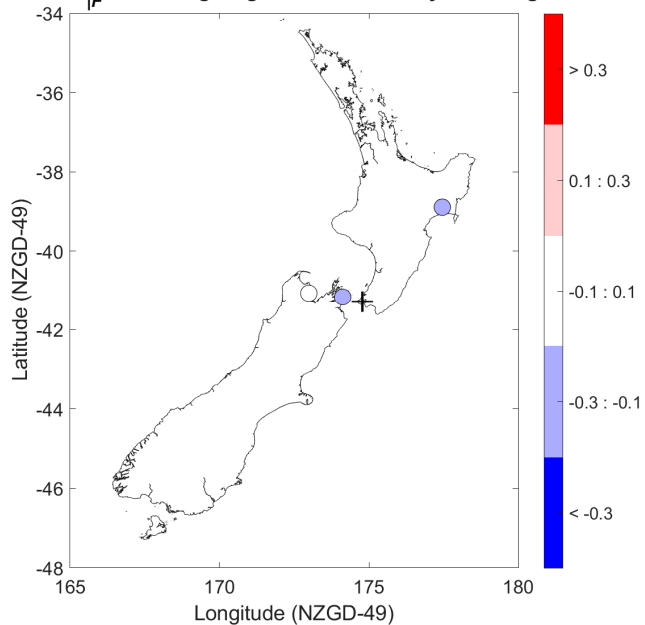

$\tau$ :  $SS/F_F$  skew-surge lags river-flow +4 days: Wellington

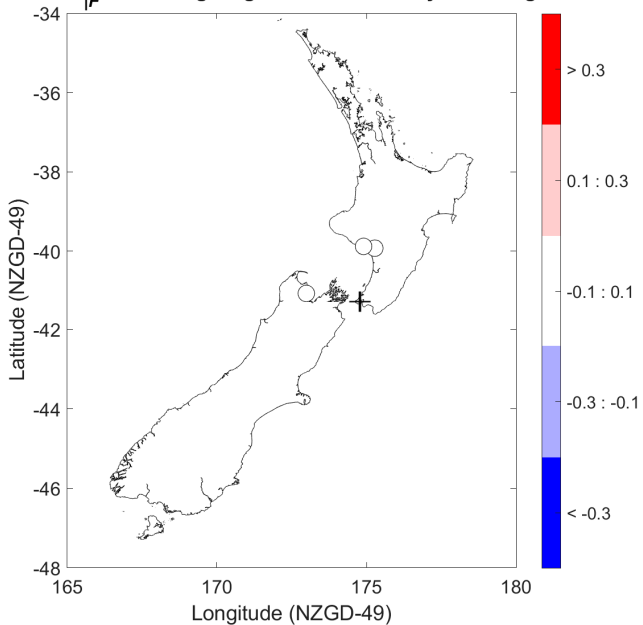

$\tau$ :  $SS/F_F$  skew-surge lags river-flow +5 days: Wellington

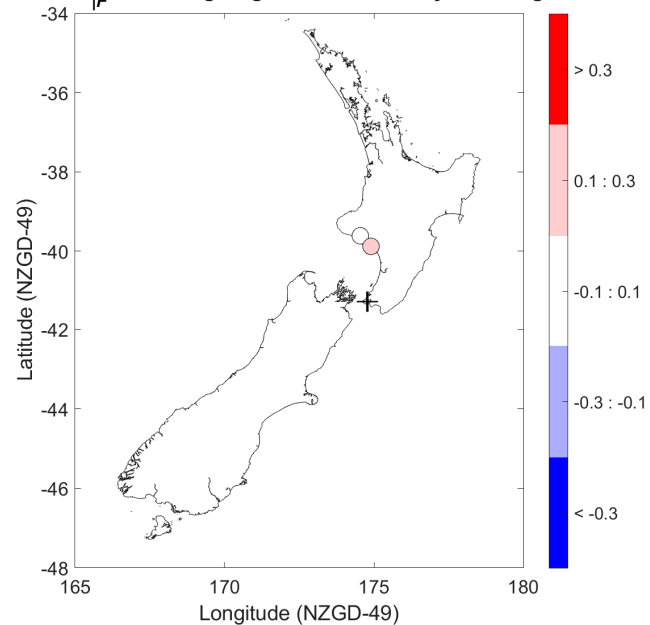



## Jackson Bay

$\tau$ :  $SS/F$  skew-surge precedes river-flow 5 days: JacksonBay

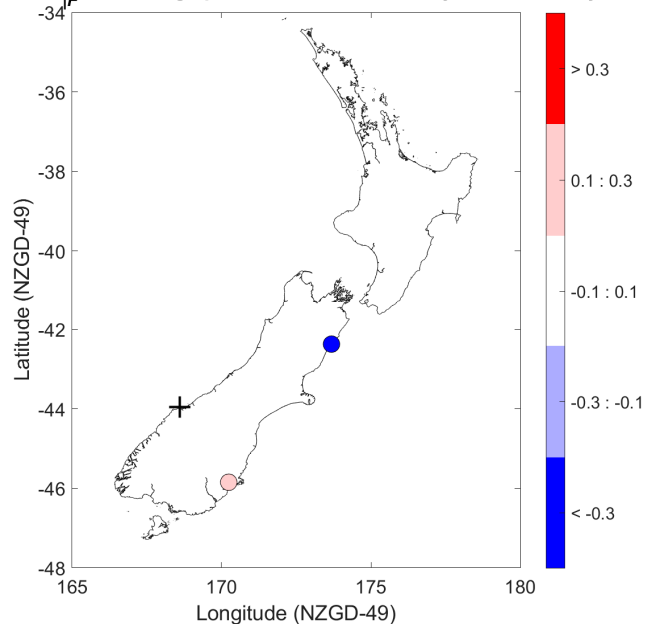

$\tau$ :  $SS/F$  skew-surge precedes river-flow 4 days: JacksonBay

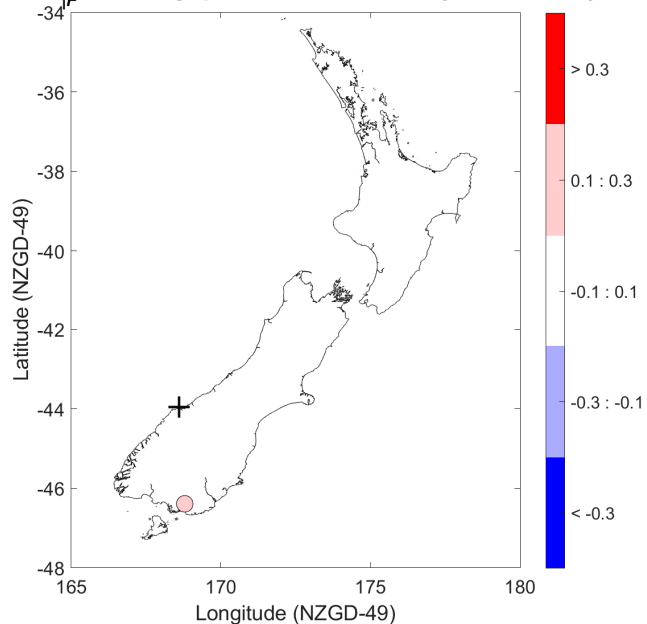

$\tau$ :  $SS/F$  skew-surge precedes river-flow 3 days: JacksonBay

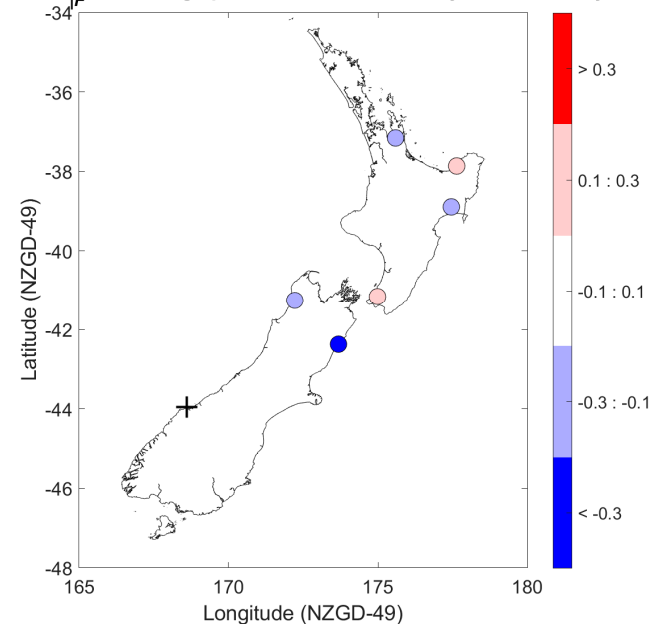

$\tau$ :  $SS/F$  skew-surge precedes river-flow 2 days: JacksonBay

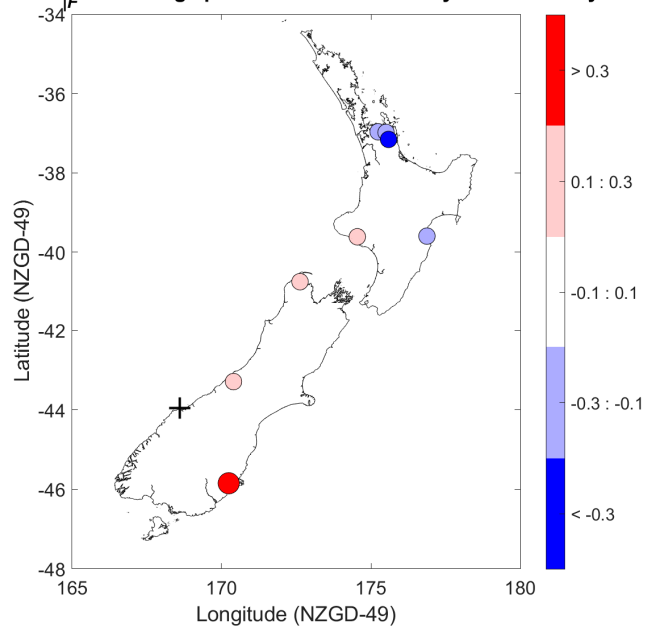

$\tau$ :  $SS/F$  skew-surge precedes river-flow 1 days: JacksonBay

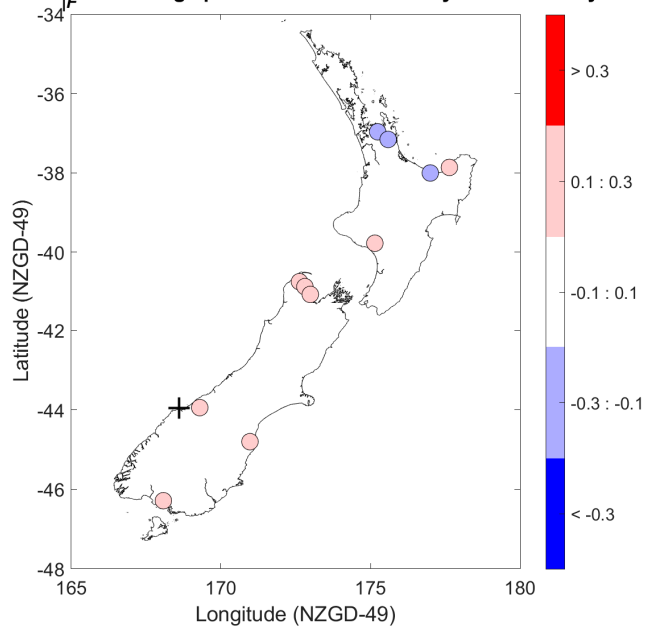

$\tau$ :  $SS/F$  peak skew-surge same day as river-flow: JacksonBay

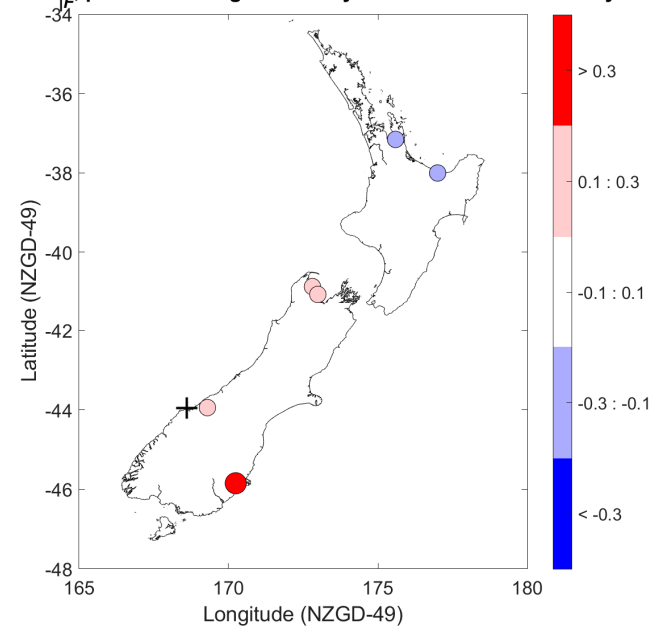

$\tau$ :  $SS/F_F$  skew-surge  $\pm 1$  days of river-flow: JacksonBay

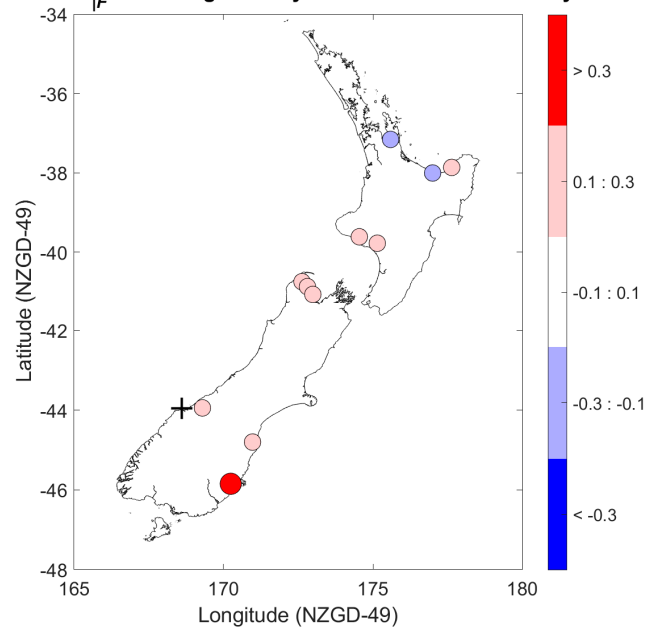

$\tau$ :  $SS/F_F$  skew-surge lags river-flow +1 days: JacksonBay

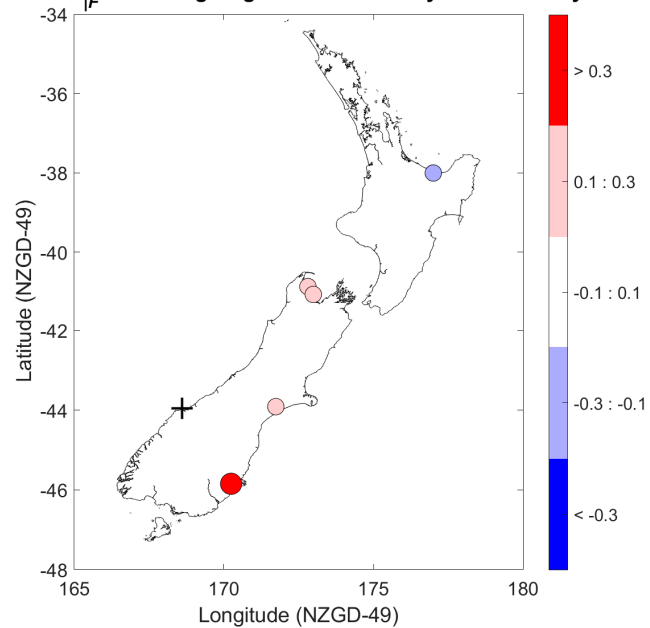

$\tau$ :  $SS/F_F$  skew-surge lags river-flow +2 days: JacksonBay

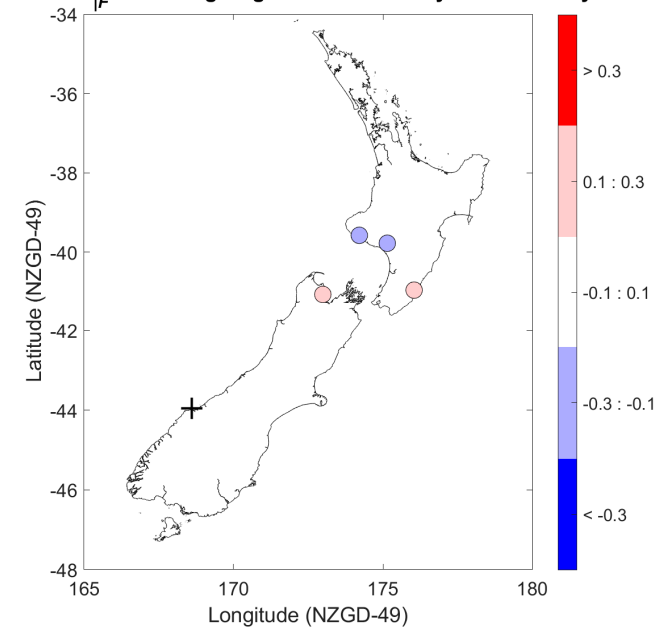

$\tau$ :  $SS/F_F$  skew-surge lags river-flow +3 days: JacksonBay

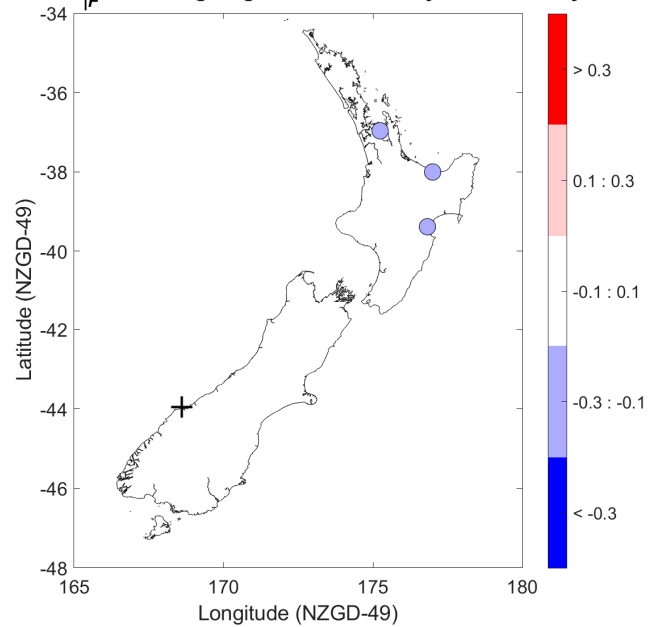

$\tau$ :  $SS/F_F$  skew-surge lags river-flow +4 days: JacksonBay

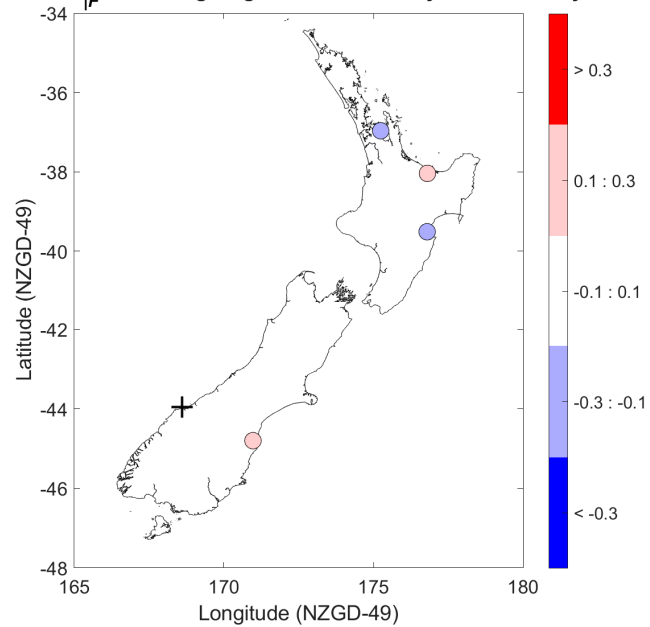

$\tau$ :  $SS/F_F$  skew-surge lags river-flow +5 days: JacksonBay

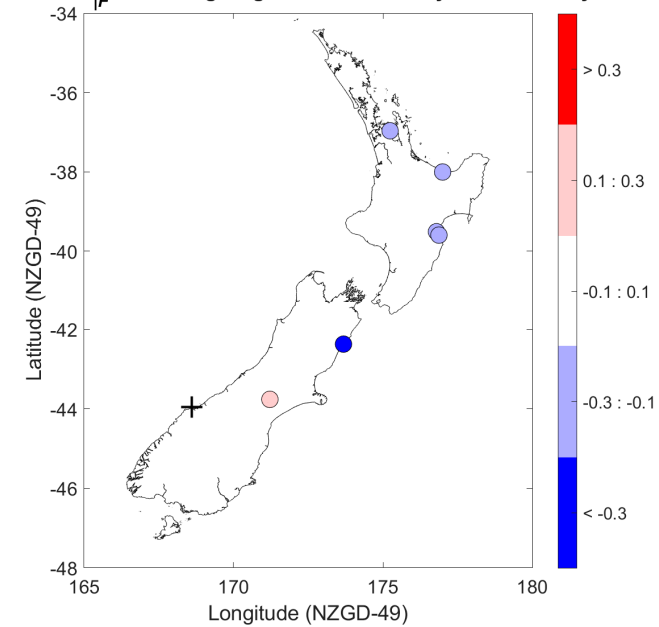

Lyttelton

$\tau$ :  $SS/F_F$  skew-surge precedes river-flow 5 days: Lyttelton

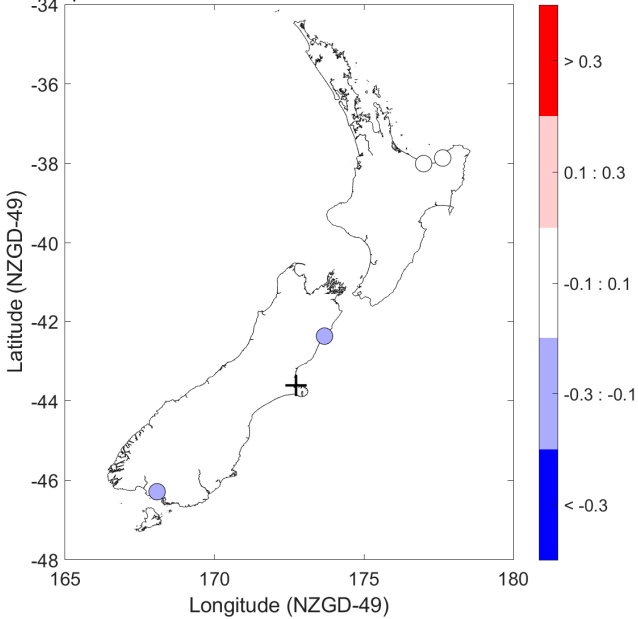

$\tau$ :  $SS/F_F$  skew-surge precedes river-flow 4 days: Lyttelton

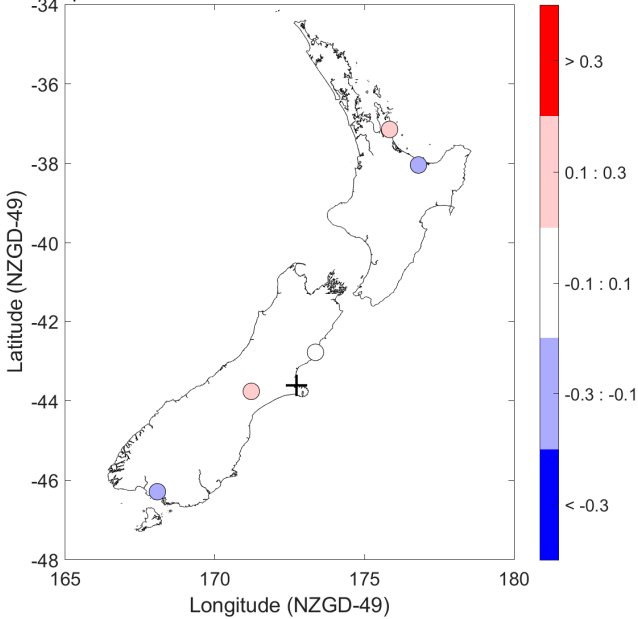

$\tau$ :  $SS/F_F$  skew-surge precedes river-flow 3 days: Lyttelton

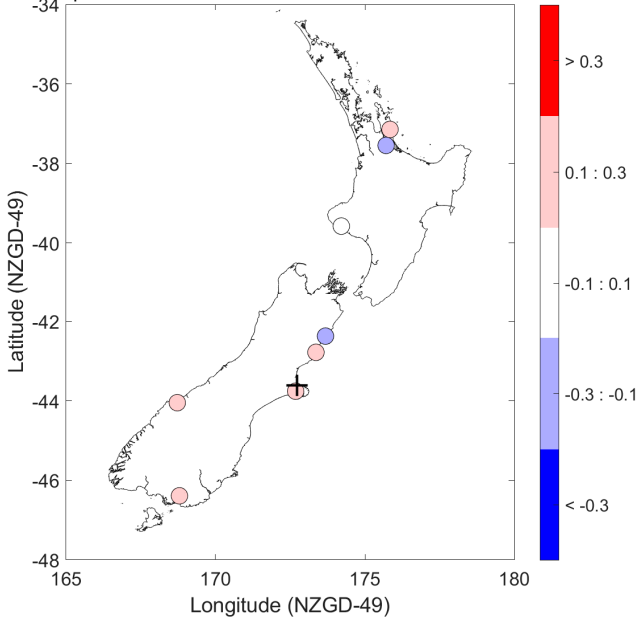

$\tau$ :  $SS/F_F$  skew-surge precedes river-flow 2 days: Lyttelton

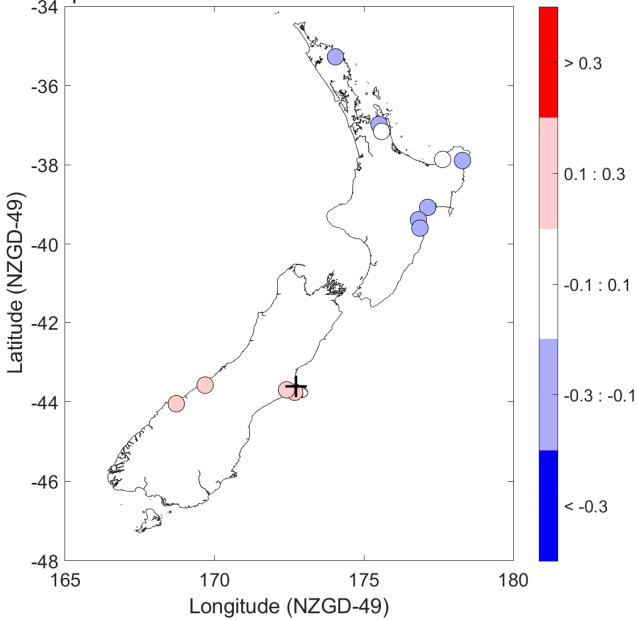

$\tau$ :  $SS/F_F$  skew-surge precedes river-flow 1 days: Lyttelton

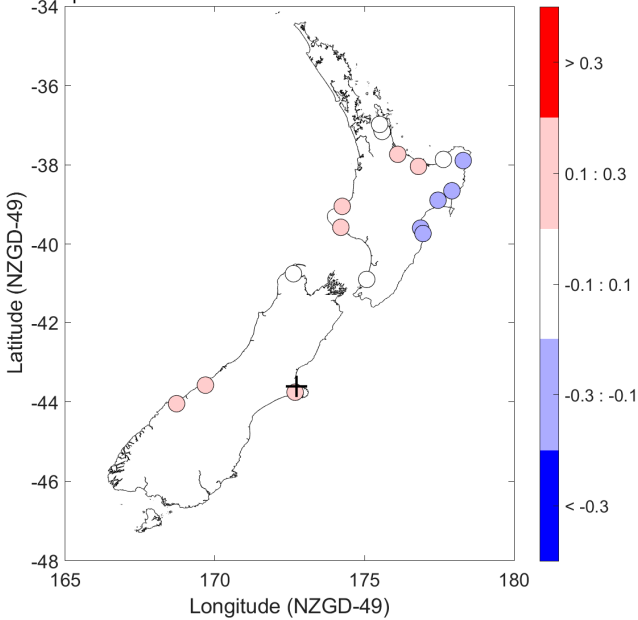

$\tau$ :  $SS/F_F$  peak skew-surge same day as river-flow: Lyttelton

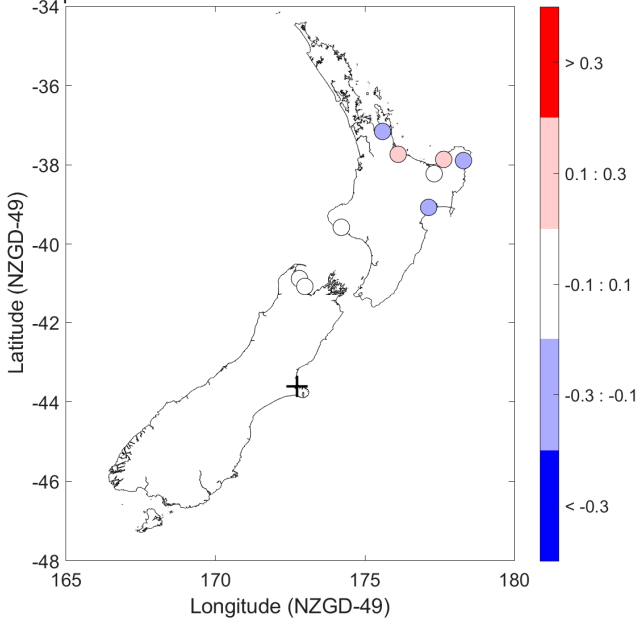

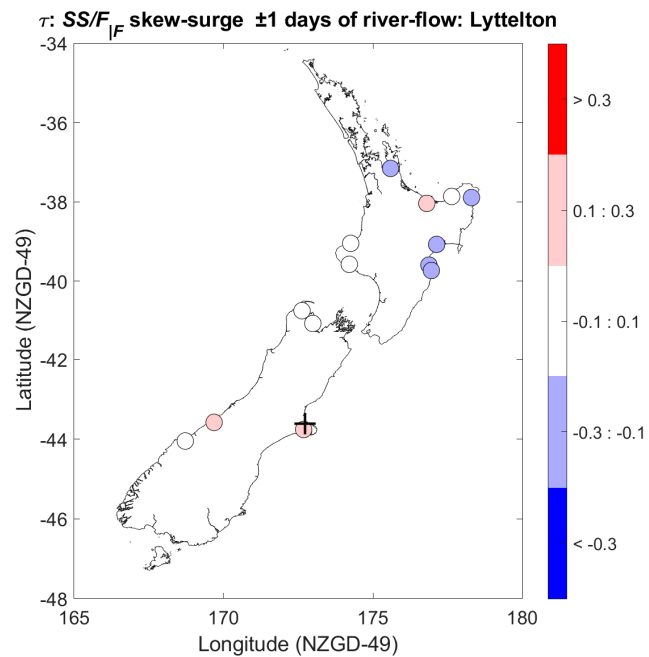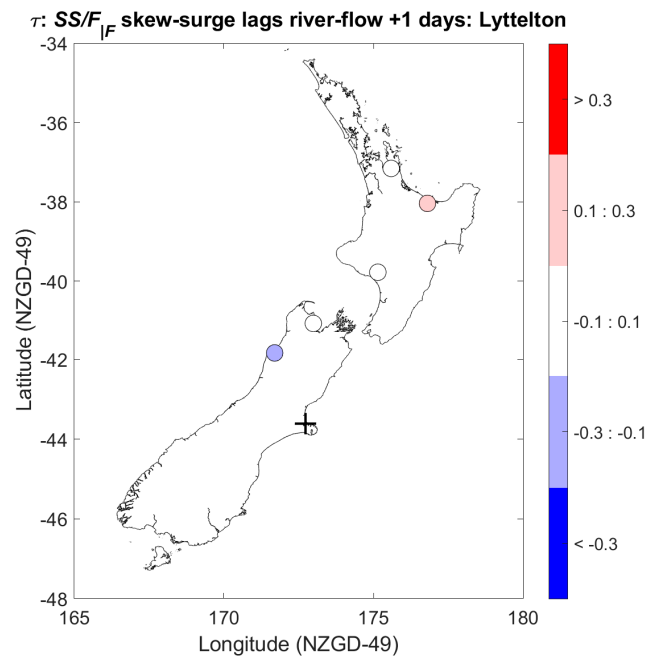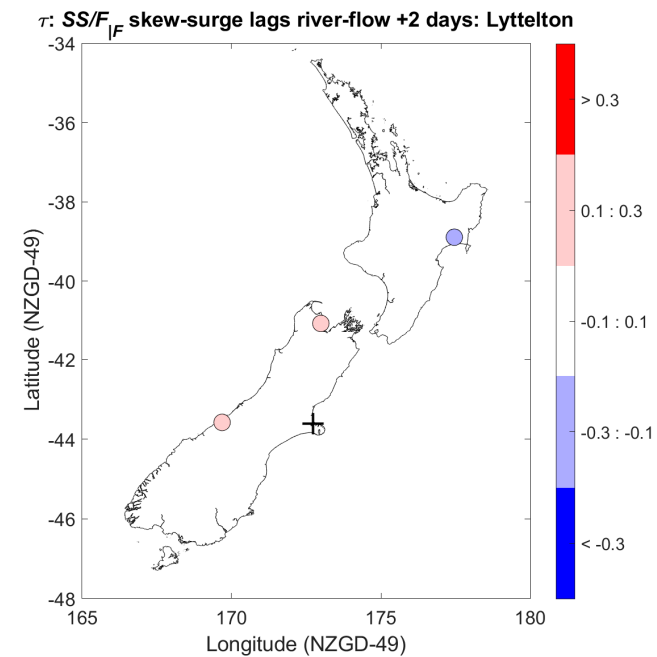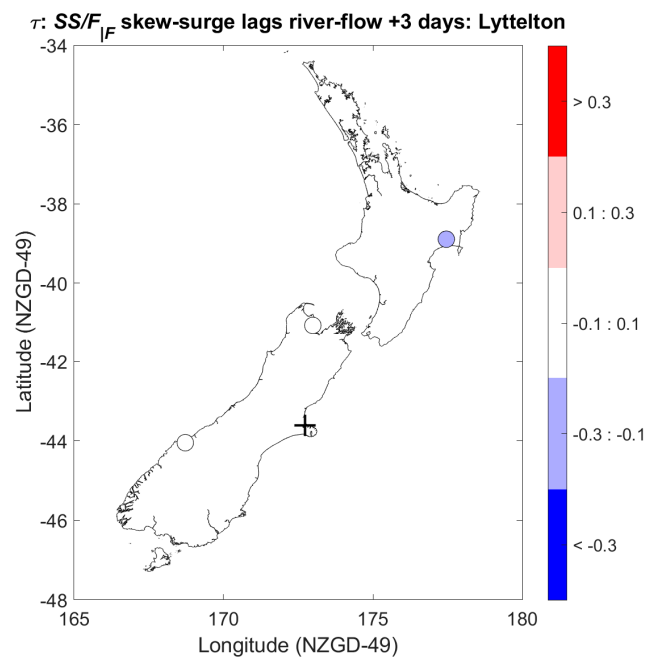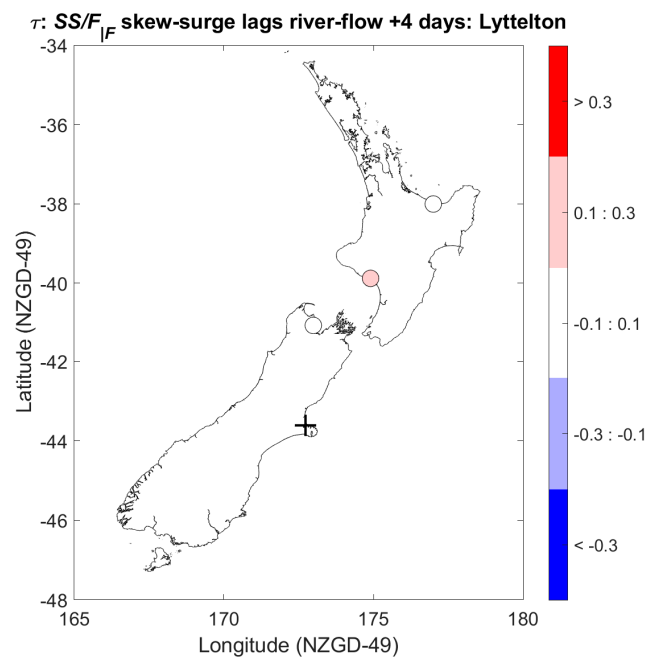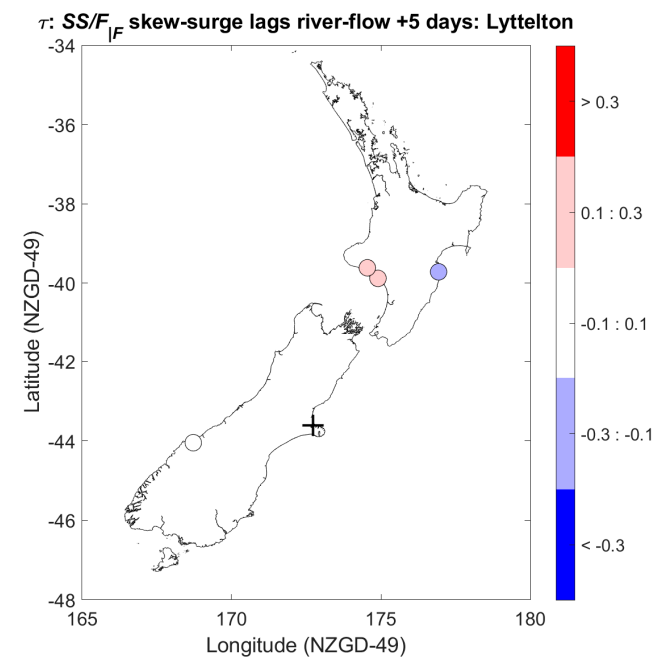

Dunedin

$\tau$ :  $SS/F_F$  skew-surge precedes river-flow 5 days: Dunedin

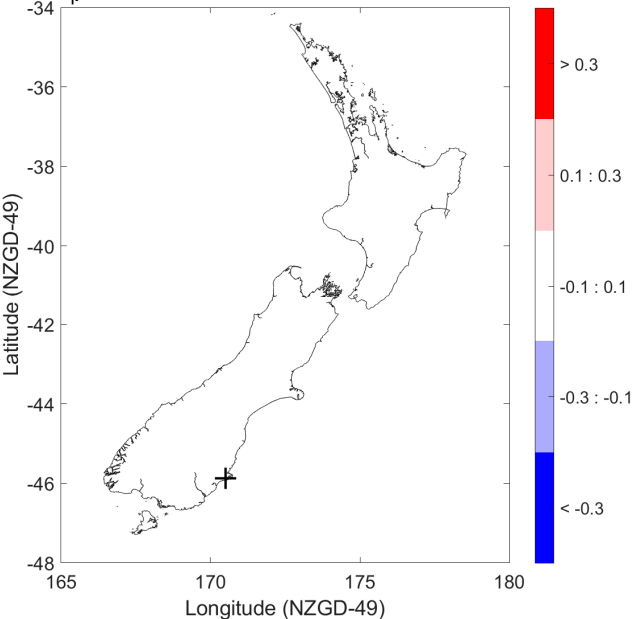

$\tau$ :  $SS/F_F$  skew-surge precedes river-flow 4 days: Dunedin

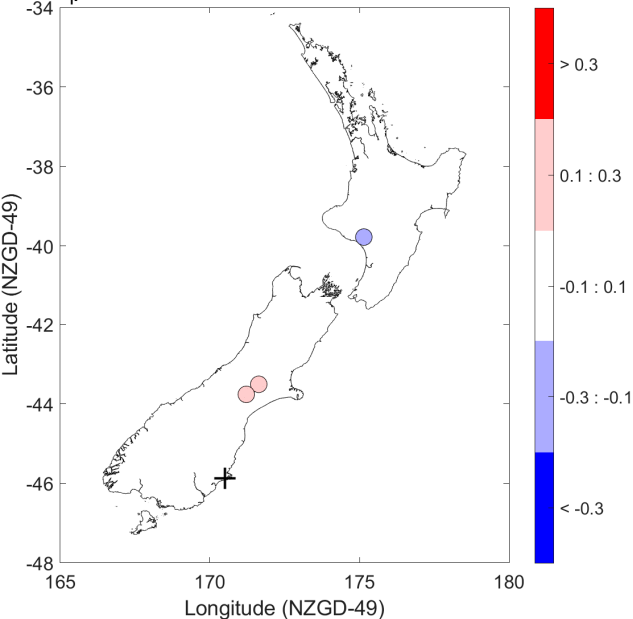

$\tau$ :  $SS/F_F$  skew-surge precedes river-flow 3 days: Dunedin

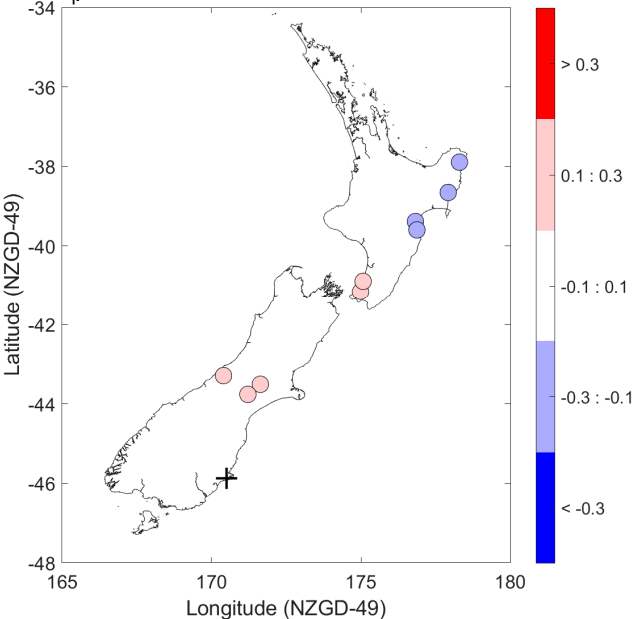

$\tau$ :  $SS/F_F$  skew-surge precedes river-flow 2 days: Dunedin

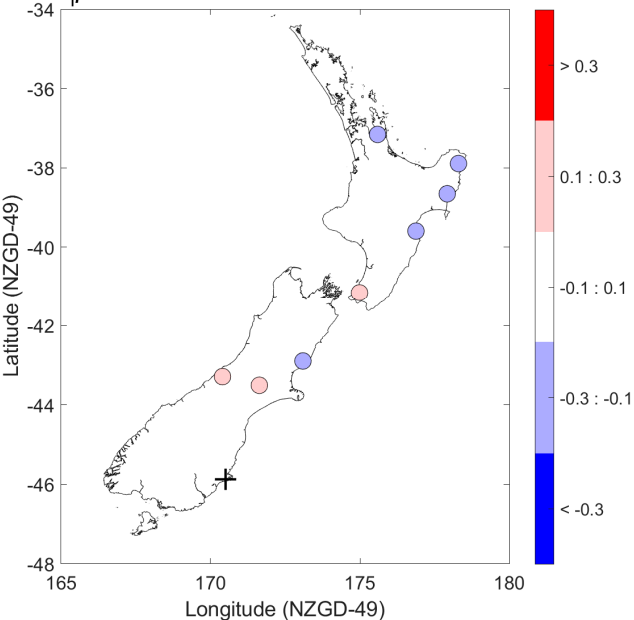

$\tau$ :  $SS/F_F$  skew-surge precedes river-flow 1 days: Dunedin

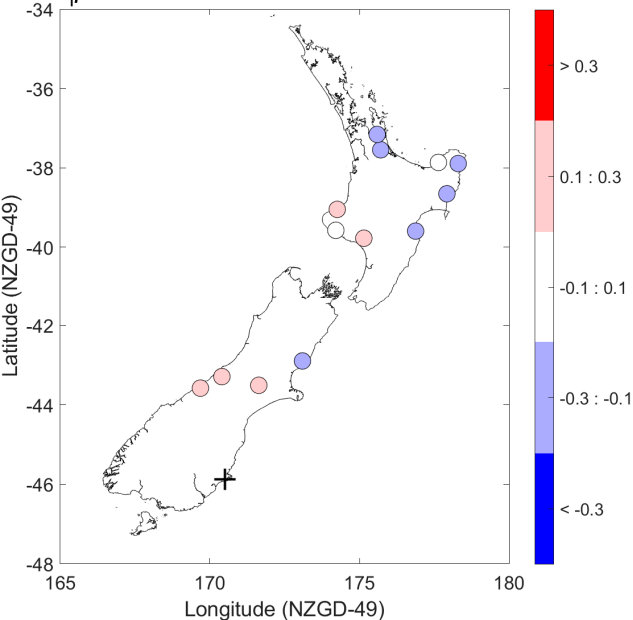

$\tau$ :  $SS/F_F$  peak skew-surge same day as river-flow: Dunedin

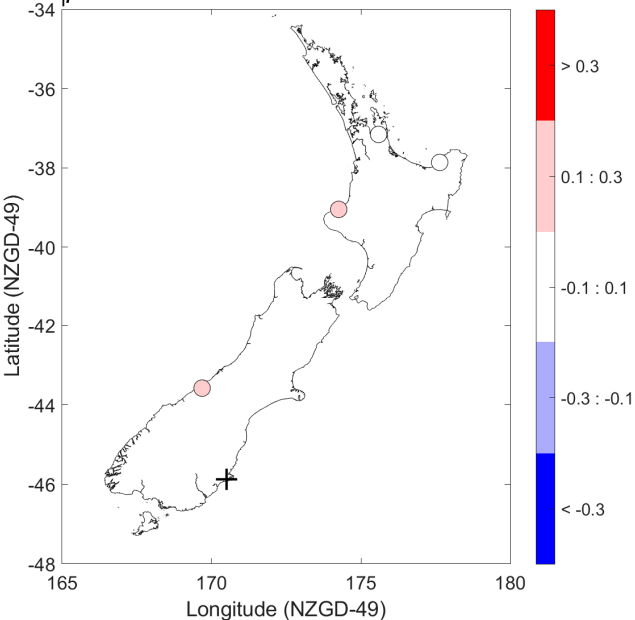

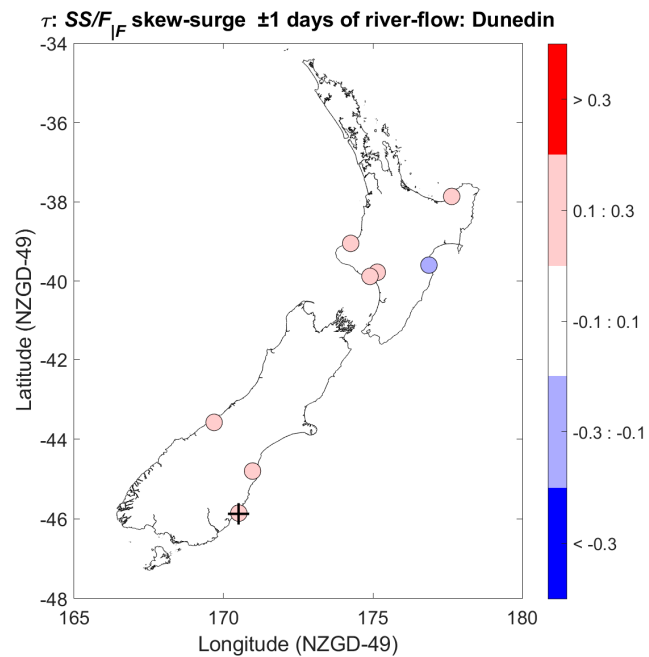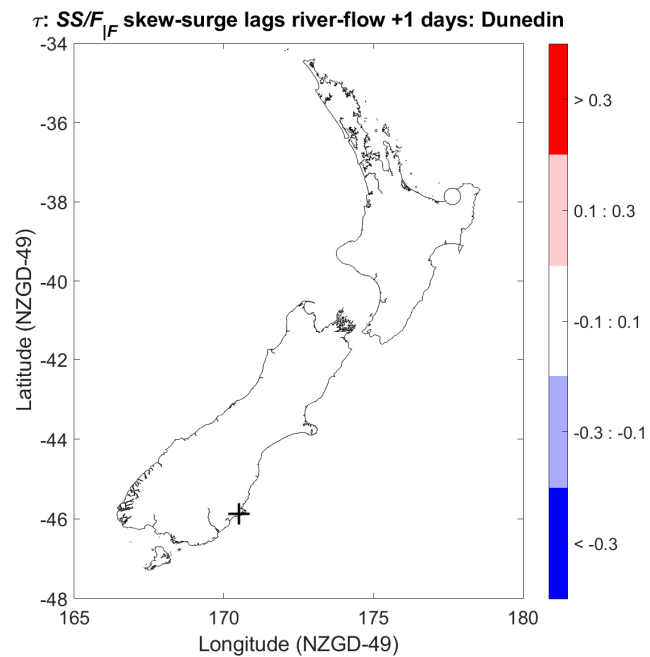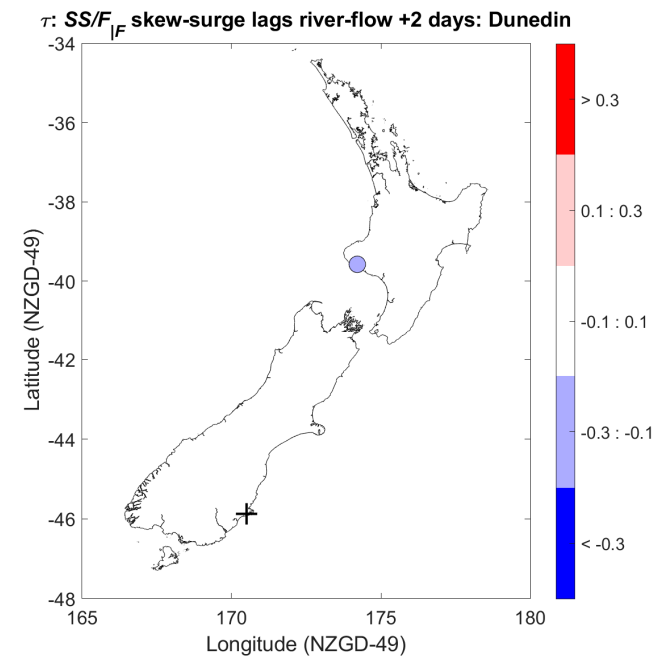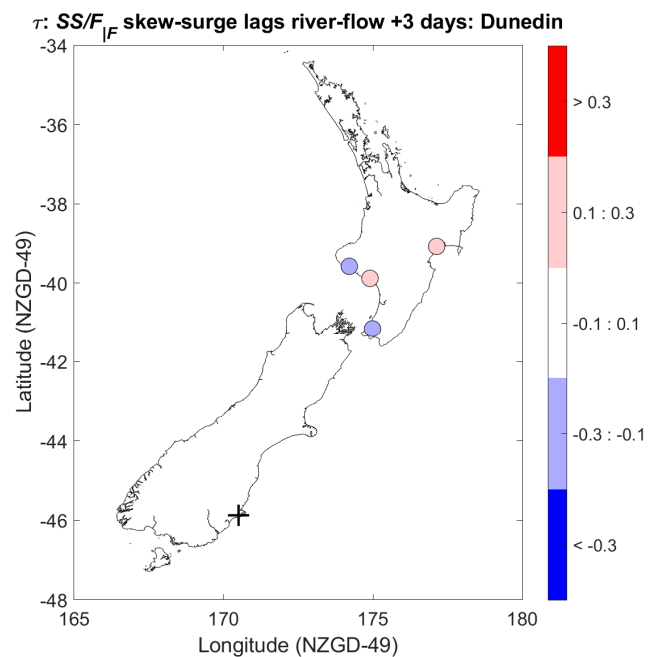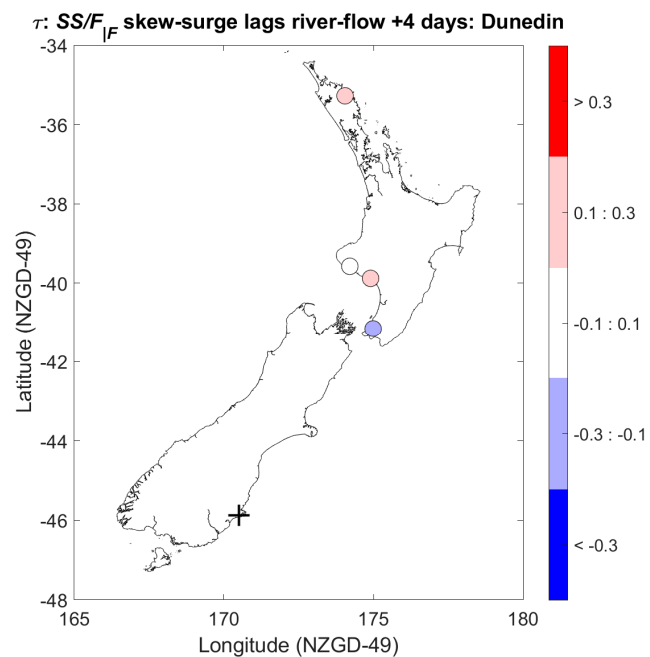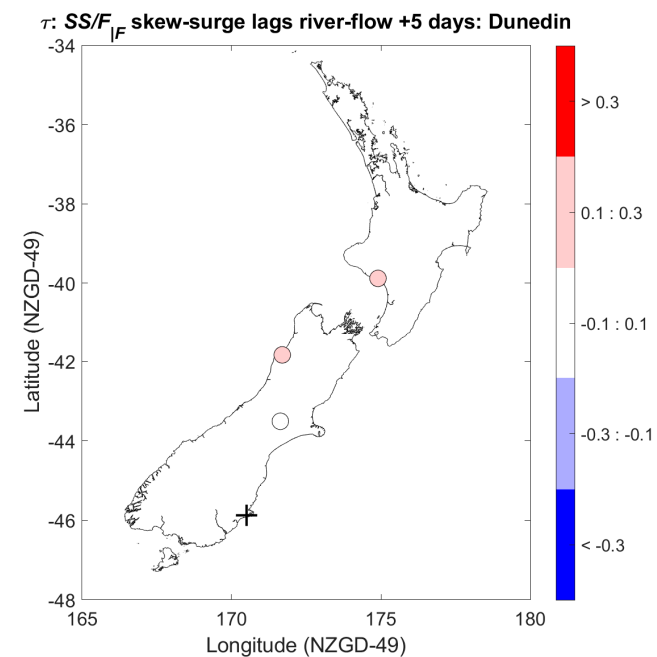

Dog Island

$\tau: SS/F_F$  skew-surge precedes river-flow 5 days: DogIsland

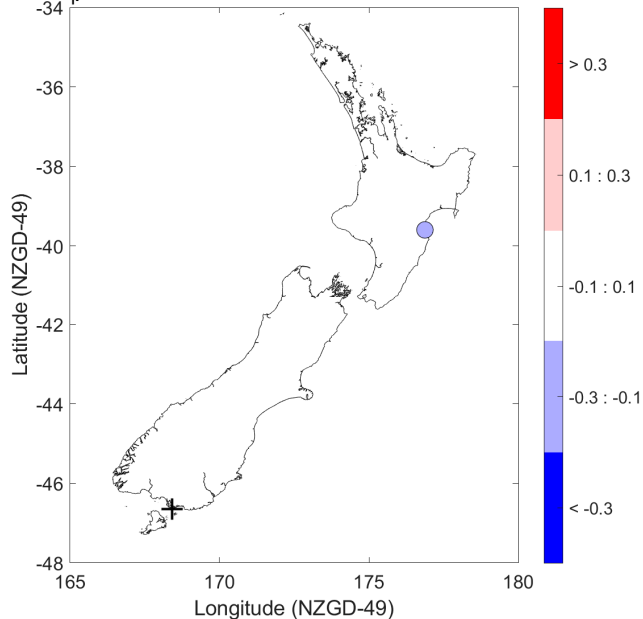

$\tau: SS/F_F$  skew-surge precedes river-flow 4 days: DogIsland

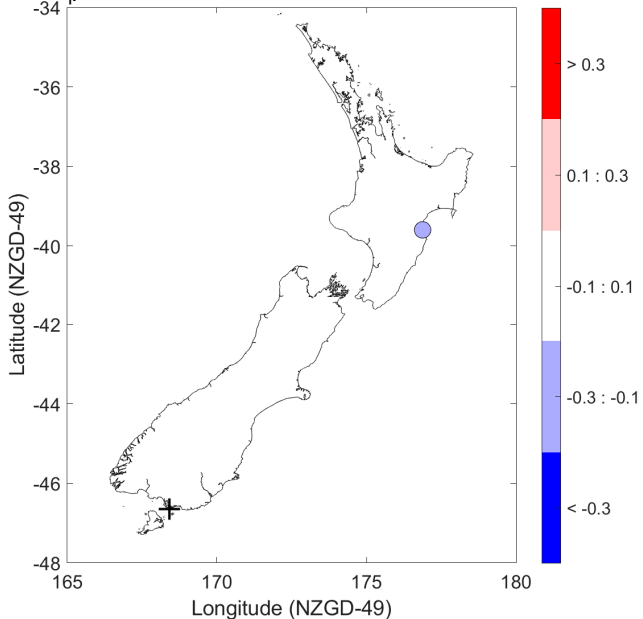

$\tau: SS/F_F$  skew-surge precedes river-flow 3 days: DogIsland

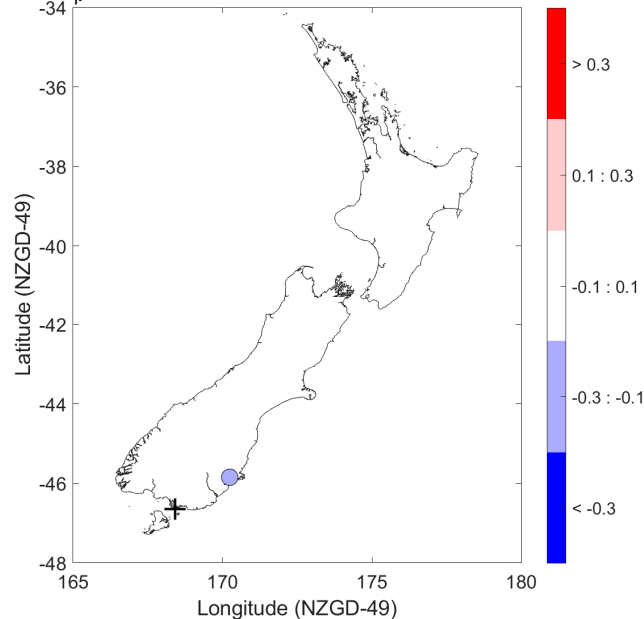

$\tau: SS/F_F$  skew-surge precedes river-flow 2 days: DogIsland

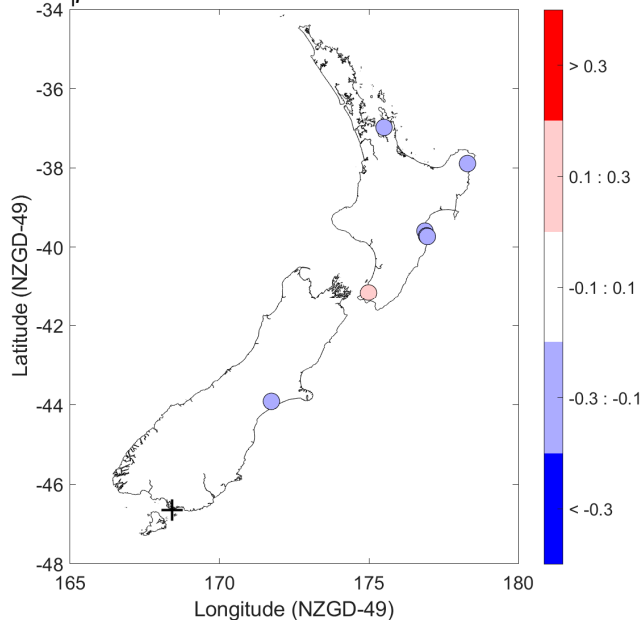

$\tau: SS/F_F$  skew-surge precedes river-flow 1 days: DogIsland

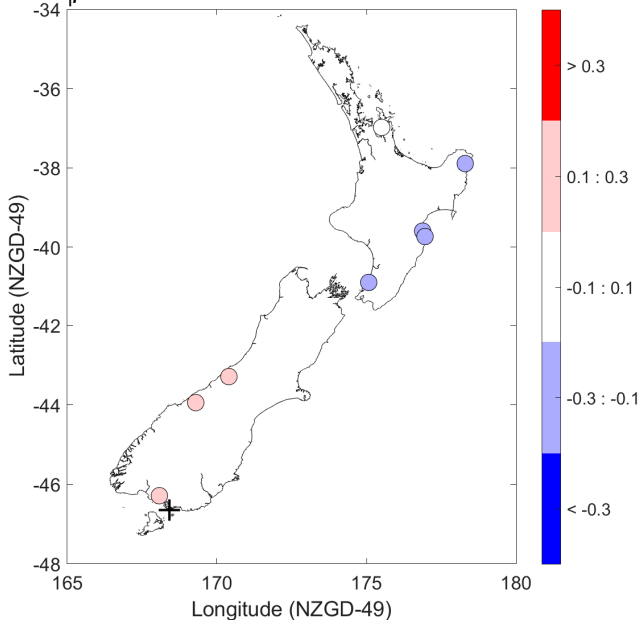

$\tau: SS/F_F$  peak skew-surge same day as river-flow: DogIsland

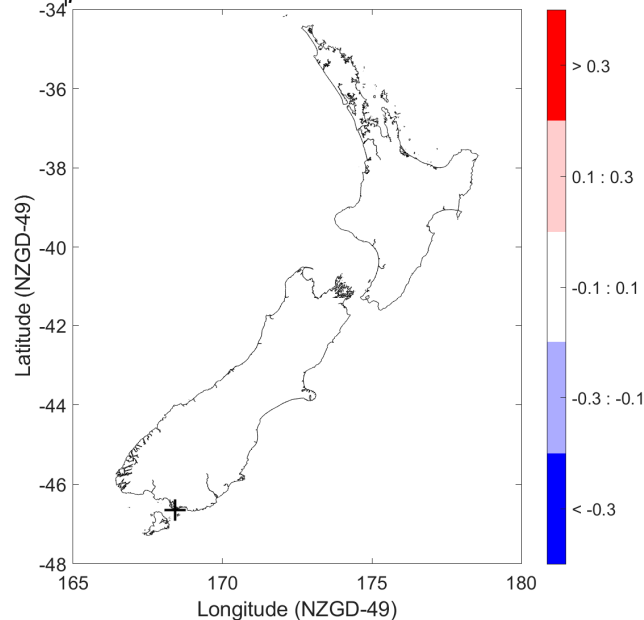

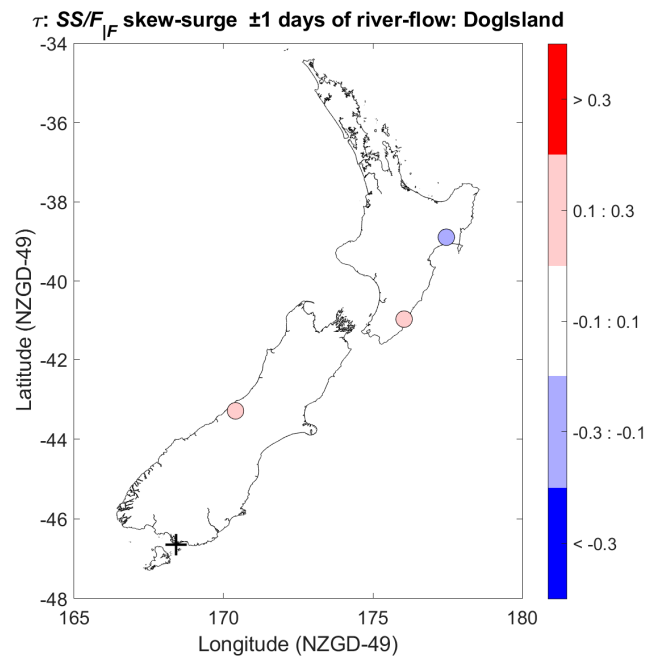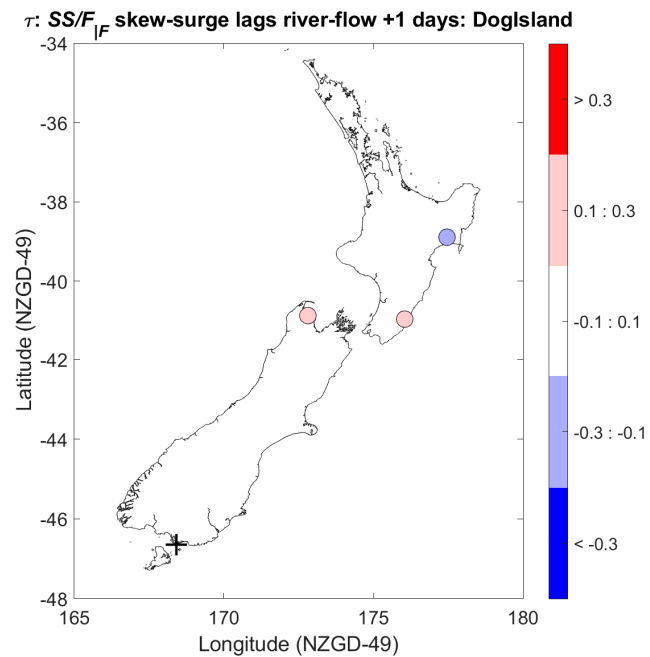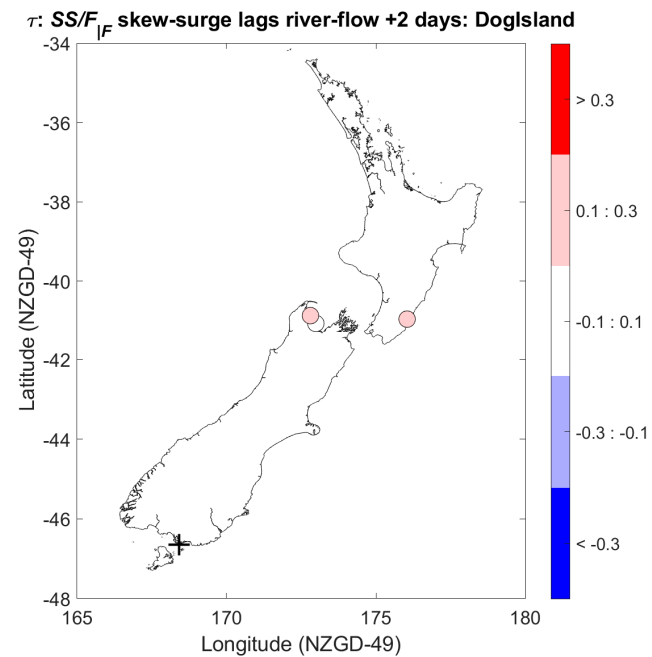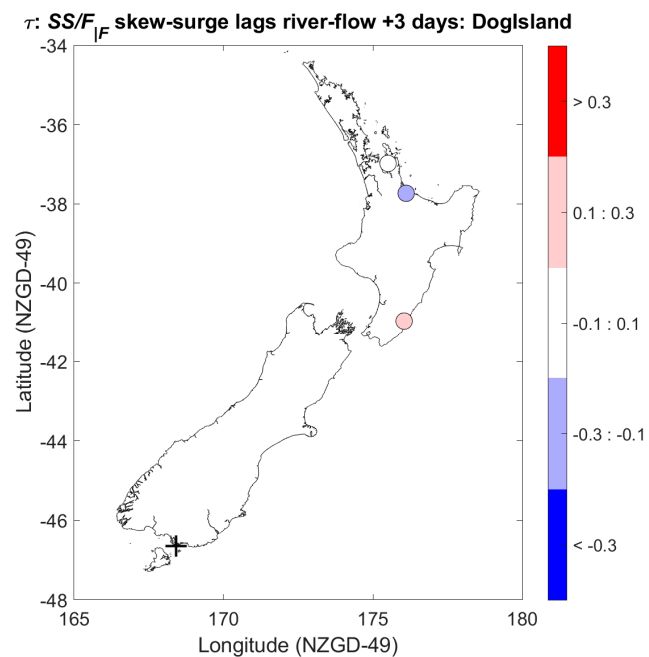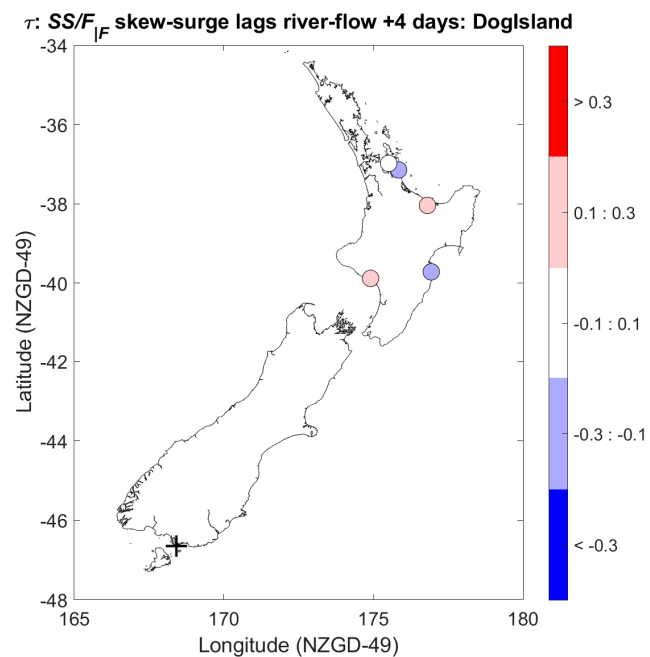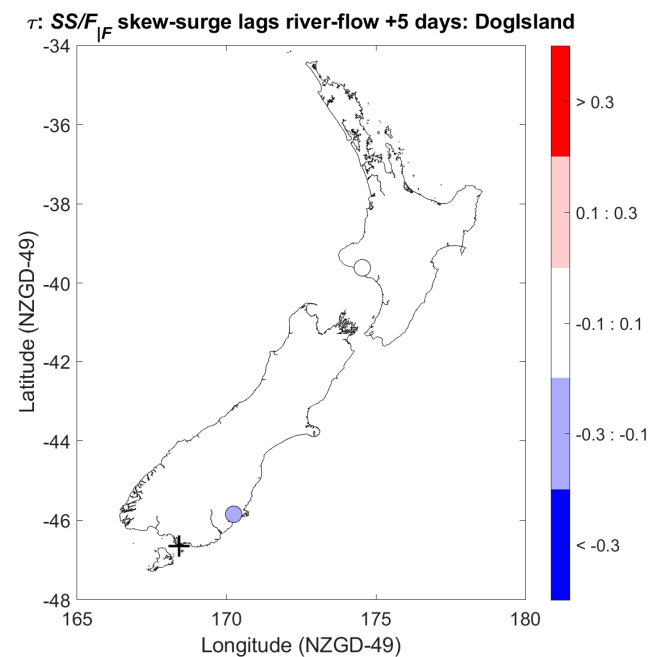

Supplement: s1 [file s1]
